# Supplementary material for: Identification and Analysis of Genes Involved in Double Fertilization in Rice
Source: Int J Mol Sci. 2021 Nov 27;22(23):12850. doi: 10.3390/ijms222312850 (PMC8657449; doi:10.3390/ijms222312850)
Supplement: Supplementary file 1 [file ijms-22-12850-s001.zip]

Archive with 25 entries (25 files):
- ijms-1479708 sup.pdf
- Table S1. The mapping results of the RNA-seq reads..xlsx
- Table S10. GO enrichment analysis of the 116 PTRGs expressed in anther but not in pistil..xls
- Table S11. KEGG enrichment analysis of the 116 PTRGs expressed in anther but not in pistil..xls
- Table S12. The 69 PTRGs not expressed in pistil and anther..xlsx
- Table S13. GO enrichment analysis of the 69 pollen tube-activated genes..xls
- Table S14. KEGG enrichment analysis of the 69 pollen tube-activated genes..xls
- Table S15. 23 pollen tube-related AGP genes..xlsx
- Table S16. The distributions of the pollen tube-related AGP, CRP and RLK genes in pistil and anther..xlsx
- Table S17. The 773 CRP genes in rice..xlsx
- Table S18. The 1558 RLK genes in rice..xlsx
- Table S19. The 332 genes related to the fusion of the male-female gametes..xlsx
- Table S2. GO enrichment analysis of the 1669 pollen tube-related genes..xls
- Table S20. GO enrichment analysis of the 332 genes involved in the recognition and fusion of the male-female gametes..xls
- Table S21. KEGG enrichment analysis of the 332 genes involved in the recognition and fusion of the male-female gametes..xls
- Table S22. The 430 genes related to the zygote formation and endosperm nuclear division..xlsx
- Table S23. GO enrichment analysis of the 430 genes related to the zygote formation and the endosperm nuclear division..xls
- Table S24. Primers used for qRT-PCR..xlsx
- Table S3. KEGG enrichment analysis of the 1669 pollen tube-related genes..xls
- Table S4. The 1287 PTRGs expressed in both pistil and anther..xlsx
- Table S5. GO enrichment analysis of the 1287 PTRGs expressed in both pistil and anther..xls
- Table S6. KEGG enrichment analysis of the 1287 PTRGs expressed in both the pistil and the anther..xls
- Table S7. The 197 PTRGs expressed in pistil but not in anther..xlsx
- Table S8. GO enrichment analysis of the 197 PTRGs expressed in pistil but not in anther..xls
- Table S9. The 116 PTRGs expressed in anther but not in pistil..xlsx
