# Supplementary material for: Identification and Analysis of Genes Involved in Double Fertilization in Rice
Source: Int J Mol Sci. 2021 Nov 27;22(23):12850. doi: 10.3390/ijms222312850 (PMC8657449; doi:10.3390/ijms222312850)
Supplement: Supplementary file 1 [file ijms-22-12850-s001.zip › Table S1. The mapping results of the RNA-seq reads..xlsx]

## Sheet: Sheet1
Table S1. The mapping results of the RNA-seq reads.
Samples	Total reads	Totally mapped	Multiply mapped	Uniquely mapped
N1-1	60399596	58798815 (97.35%)	2471493 (4.09%)	56327322 (93.26%)
N1-2	60119252	58980934 (98.11%)	2604364 (4.33%)	56376570 (93.77%)
N1-3	52191220	51219476 (98.14%)	2495066 (4.78%)	48724410 (93.36%)
N2-1	50692800	49716555 (98.07%)	2824330 (5.57%)	46892225 (92.50%)
N2-2	55413912	54305426 (98.00%)	2361937 (4.26%)	51943489 (93.74%)
N2-3	59127298	58056109 (98.19%)	2626968 (4.44%)	55429141 (93.75%)
N3-1	59762500	58538208 (97.95%)	2165342 (3.62%)	56372866 (94.33%)
N3-2	58779790	57645377 (98.07%)	2084197 (3.55%)	55561180 (94.52%)
N3-3	63138914	61881216 (98.01%)	2314509 (3.67%)	59566707 (94.34%)
M1-1	56291314	55116217 (97.91%)	1965181 (3.49%)	53151036 (94.42%)
M1-2	61560440	60168424 (97.74%)	2921507 (4.75%)	57246917 (92.99%)
M1-3	55924292	54605589 (97.64%)	2517223 (4.50%)	52088366 (93.14%)
M2-1	56695300	55493024 (97.88%)	2338925 (4.13%)	53154099 (93.75%)
M2-2	51435906	50377198 (97.94%)	2417418 (4.70%)	47959780 (93.24%)
M2-3	54116208	53089915 (98.10%)	1968228 (3.64%)	51121687 (94.47%)
M3-1	55335284	54292535 (98.12%)	2433143 (4.40%)	51859392 (93.72%)
M3-2	57149412	56073982 (98.12%)	2240044 (3.92%)	53833938 (94.20%)
M3-3	58889176	57453088 (97.56%)	2584755 (4.39%)	54868333 (93.17%)
