# Supplementary material for: Identification and Analysis of Genes Involved in Double Fertilization in Rice
Source: Int J Mol Sci. 2021 Nov 27;22(23):12850. doi: 10.3390/ijms222312850 (PMC8657449; doi:10.3390/ijms222312850)
Supplement: Supplementary file 1 [file ijms-22-12850-s001.zip › Table S2. GO enrichment analysis of the 1669 pollen tube-related genes..xls]

## Sheet: Sheet1
Table S2. GO enrichment analysis of the 1669 pollen tube-related genes.
GO ID	Term Type	Description	p-adjust	Gene Number	Type
GO:0042545	BP	cell wall modification	0.000580098	15	Cell wall
GO:0071555	BP	cell wall organization	0.000580098	45
GO:0071554	BP	cell wall organization or biogenesis	0.000580098	52
GO:0045490	BP	pectin catabolic process	0.000580098	19	Pectin
GO:0045488	BP	pectin metabolic process	0.000580098	22
GO:0010393	BP	galacturonan metabolic process	0.000580098	22	Carbohydrate
GO:0005976	BP	polysaccharide metabolic process	0.000580098	50
GO:0000272	BP	polysaccharide catabolic process	0.000596385	26
GO:0016051	BP	carbohydrate biosynthetic process	0.000621133	32
GO:0005975	BP	carbohydrate metabolic process	0.000621133	124
GO:0005992	BP	trehalose biosynthetic process	0.000943366	9
GO:0005991	BP	trehalose metabolic process	0.00115865	9
GO:0034637	BP	cellular carbohydrate biosynthetic process	0.0056432	22
GO:0046351	BP	disaccharide biosynthetic process	0.00653088	9
GO:0016052	BP	carbohydrate catabolic process	0.0156112	29
GO:0009312	BP	oligosaccharide biosynthetic process	0.0172103	9
GO:0044262	BP	cellular carbohydrate metabolic process	0.0201357	36
GO:2000022	BP	regulation of jasmonic acid mediated signaling pathway	0.000515925	8	Hormone
GO:0010817	BP	regulation of hormone levels	0.000803556	27
GO:0060918	BP	auxin transport	0.00554563	11
GO:0009914	BP	hormone transport	0.00554563	11
GO:0009926	BP	auxin polar transport	0.0301278	9
GO:0009733	BP	response to auxin	0.0483863	12
GO:0009611	BP	response to wounding	0.000580098	11	Response
GO:0034599	BP	cellular response to oxidative stress	0.00945448	9
GO:0042221	BP	response to chemical	0.00966065	39
GO:0070887	BP	cellular response to chemical stimulus	0.0345248	10
GO:0031347	BP	regulation of defense response	0.038208	10
GO:0015793	BP	glycerol transport	0.0412087	7	Transport
GO:0042044	BP	fluid transport	0.0482882	7
GO:0006833	BP	water transport	0.0482882	7
GO:0044092	BP	negative regulation of molecular function	0.000580098	29
GO:0043086	BP	negative regulation of catalytic activity	0.000580098	29
GO:0045229	BP	external encapsulating structure organization	0.000580098	47
GO:0055114	BP	oxidation-reduction process	0.000797208	139
GO:0065007	BP	biological regulation	0.00125035	258
GO:0050790	BP	regulation of catalytic activity	0.00505754	39
GO:0016311	BP	dephosphorylation	0.00538455	36
GO:0065008	BP	regulation of biological quality	0.0057253	66
GO:0065009	BP	regulation of molecular function	0.00613594	39
GO:0042737	BP	drug catabolic process	0.00697082	32
GO:0006470	BP	protein dephosphorylation	0.0120284	21
GO:0006793	BP	phosphorus metabolic process	0.0120284	179
GO:0006796	BP	phosphate-containing compound metabolic process	0.015037	177
GO:0006662	BP	glycerol ether metabolic process	0.0249625	7
GO:0018904	BP	ether metabolic process	0.0249625	7
GO:0030104	BP	water homeostasis	0.0276087	8
GO:0051346	BP	negative regulation of hydrolase activity	0.027689	11
GO:0017144	BP	drug metabolic process	0.029661	47
GO:0046620	BP	regulation of organ growth	0.0346491	7
GO:0006884	BP	cell volume homeostasis	0.0358533	8
GO:0048638	BP	regulation of developmental growth	0.038208	10
GO:0005618	CC	cell wall	0.00966065	39	Cell wall and extracellular region
GO:0030312	CC	external encapsulating structure	0.00966065	39
GO:0071944	CC	cell periphery	0.0133389	7
GO:0005576	CC	extracellular region	0.0492066	50
GO:0030599	MF	pectinesterase activity	0.000515925	18	Enzyme
GO:0045330	MF	aspartyl esterase activity	0.000515925	15
GO:0052689	MF	carboxylic ester hydrolase activity	0.000580098	24
GO:0046910	MF	pectinesterase inhibitor activity	0.000580098	14
GO:0004857	MF	enzyme inhibitor activity	0.000580098	28
GO:0042578	MF	phosphoric ester hydrolase activity	0.000621974	44
GO:0016703	MF	oxidoreductase activity, acting on single donors with incorporation of molecular oxygen, incorporation of one atom of oxygen (internal monooxygenases or internal mixed function oxidases)	0.00385454	5
GO:0004722	MF	protein serine/threonine phosphatase activity	0.0056432	16
GO:0004721	MF	phosphoprotein phosphatase activity	0.00852905	22
GO:0016788	MF	hydrolase activity, acting on ester bonds	0.00966065	81
GO:0016791	MF	phosphatase activity	0.00966065	34
GO:0016491	MF	oxidoreductase activity	0.0128756	137
GO:0010277	MF	chlorophyllide a oxygenase [overall] activity	0.0249625	4
GO:0030234	MF	enzyme regulator activity	0.0320356	32
GO:0003824	MF	catalytic activity	0.038208	628
GO:0017048	MF	Rho GTPase binding	0.0477962	5
GO:0005509	MF	calcium ion binding	0.00105567	42	Calcium
GO:0005516	MF	calmodulin binding	0.00267147	21
GO:0003714	MF	transcription corepressor activity	0.0104679	7	Transcription corepressor activity
GO:0098772	MF	molecular function regulator	0.00772832	37
GO:0005506	MF	iron ion binding	0.0144199	46
GO:0005089	MF	Rho guanyl-nucleotide exchange factor activity	0.0201357	5
GO:0051537	MF	2 iron, 2 sulfur cluster binding	0.0429235	10
