# Supplementary material for: Identification and Analysis of Genes Involved in Double Fertilization in Rice
Source: Int J Mol Sci. 2021 Nov 27;22(23):12850. doi: 10.3390/ijms222312850 (PMC8657449; doi:10.3390/ijms222312850)
Supplement: Supplementary file 1 [file ijms-22-12850-s001.zip › Table S3. KEGG enrichment analysis of the 1669 pollen tube-related genes..xls]

## Sheet: Sheet1
Table S3. KEGG enrichment analysis of the 1669 pollen tube-related genes.
Pathway ID	Description	First Category	Second Category	p-adjust	Gene number
map00500	Starch and sucrose metabolism	Metabolism	Carbohydrate metabolism	5.34369e-06	34
map00040	Pentose and glucuronate interconversions	Metabolism	Carbohydrate metabolism	0.000327499	15
map00630	Glyoxylate and dicarboxylate metabolism	Metabolism	Carbohydrate metabolism	0.0441495	12
map00592	alpha-Linolenic acid metabolism	Metabolism	Lipid metabolism	0.00265327	11
map04075	Plant hormone signal transduction	Environmental Information Processing	Signal transduction	9.04508e-06	38
map00906	Carotenoid biosynthesis	Metabolism	Metabolism of terpenoids and polyketides	0.00261115	8
