# Supplementary material for: Identification and Analysis of Genes Involved in Double Fertilization in Rice
Source: Int J Mol Sci. 2021 Nov 27;22(23):12850. doi: 10.3390/ijms222312850 (PMC8657449; doi:10.3390/ijms222312850)
Supplement: Supplementary file 1 [file ijms-22-12850-s001.zip › Table S4. The 1287 PTRGs expressed in both pistil and anther..xlsx]

## Sheet: Sheet1
Gene_id	Log2FC(N3/N0)	Pvalue	Padjust	Significant	Regulate	N0	N3	N0_1	N0_2	N0_3	N3_1	N3_2	N3_3	Gene name	Gene description
LOC_Os08g29770	6.35806	2.5e-213	8.46e-209	yes	up	1.61	153.6	1.48	1.48	1.87	138.24	127.02	195.54		RecName: Full=Endoglucanase 20; AltName: Full=Endo-1,4-beta glucanase 20; AltName: Full=OsGLU15; Flags: Precursor
LOC_Os02g02320	5.47908	1.77e-155	6e-151	yes	up	10.4667	499.89	12.39	11.5	7.51	493.69	499.24	506.74		RecName: Full=Serine carboxypeptidase 3; AltName: Full=Serine carboxypeptidase III; Flags: Precursor
LOC_Os02g57250	4.65475	2.41e-126	8.14e-122	yes	up	5.34	142.613	4.23	5.73	6.06	154.14	153.83	119.87		RecName: Full=Auxin-responsive protein IAA10; AltName: Full=Indoleacetic acid-induced protein 10
LOC_Os04g39980	5.0726	1.04e-105	3.52e-101	yes	up	1.59667	57.12	0.99	1.79	2.01	55.49	62.26	53.61		RecName: Full=2-oxoglutarate-dependent dioxygenase DAO; AltName: Full=Protein DIOXYGENASE FOR AUXIN OXIDATION
LOC_Os01g04290	4.72753	5.72e-98	1.93e-93	yes	up	15.9567	454.253	20.28	11.9	15.69	421.94	491.15	449.67		RecName: Full=Putative Pol polyprotein from transposon element Bs1; Short=ORF 1
LOC_Os05g02070	2.33477	7.34e-89	2.48e-84	yes	up	925.527	5012.49	868.29	986.89	921.4	4694.97	4977.29	5365.22		_
LOC_Os10g36500	4.75192	1.09e-88	3.69e-84	yes	up	1.93667	55.2	2.13	1.35	2.33	48.37	57.21	60.02		_
LOC_Os02g42450	5.67833	2e-85	6.76e-81	yes	up	2.62333	140.353	4.13	1.98	1.76	126.41	143.79	150.86		RecName: Full=Putative ripening-related protein 2; Flags: Precursor
LOC_Os04g51520	5.15613	2.45e-85	8.3e-81	yes	up	1.21	45.8667	1.39	0.76	1.48	41.68	53.79	42.13		RecName: Full=Probable xyloglucan endotransglucosylase/hydrolase protein 21; Short=At-XTH21; Short=XTH-21; Flags: Precursor
LOC_Os03g47610	4.30159	1.28e-84	4.32e-80	yes	up	1.12	24.2433	1.28	1.4	0.68	20.89	25.12	26.72		RecName: Full=Phosphomethylpyrimidine synthase, chloroplastic; AltName: Full=Hydroxymethylpyrimidine phosphate synthase; Short=HMP-P synthase; Short=HMP-phosphate s
LOC_Os02g45310	3.78635	1.55e-81	5.26e-77	yes	up	1.71333	25.1667	1.37	2.2	1.57	23.78	25.62	26.1		RecName: Full=Probable methyltransferase PMT15
LOC_Os07g34570	3.56196	1.99e-80	6.72e-76	yes	up	83.77	1055.56	73.84	97.07	80.4	962.86	880.78	1323.05		RecName: Full=Thiamine thiazole synthase 2, chloroplastic; AltName: Full=Thiazole biosynthetic enzyme 2; Flags: Precursor
LOC_Os03g25440	5.64422	1.16e-76	3.93e-72	yes	up	1.41333	75.9867	1.27	2.2	0.77	81.29	85.83	60.84		_
LOC_Os03g58790	2.95587	1.32e-75	4.47e-71	yes	up	30.0433	247.963	28.42	32.27	29.44	200.42	275.31	268.16		RecName: Full=Probable mitochondrial chaperone BCS1-B; AltName: Full=BCS1-like protein 2
LOC_Os06g08080	3.41882	7.56e-75	2.56e-70	yes	up	13.0833	148.977	14.21	14.03	11.01	157.69	163.99	125.25		RecName: Full=Pyrophosphate-energized vacuolar membrane proton pump; AltName: Full=Pyrophosphate-energized inorganic pyrophosphatase; Short=H(+)-PPase
LOC_Os11g04010	4.32327	3.06e-71	1.04e-66	yes	up	1.29667	27.7533	1.69	1.01	1.19	29.96	28.57	24.73		RecName: Full=Metacaspase-9; Short=AtMC9; Contains: RecName: Full=Metacaspase-9 subunit p20; Contains: RecName: Full=Metacaspase-9 subunit p10; AltName: Full=Metaca
LOC_Os05g23350	5.70205	6.34e-69	2.15e-64	yes	up	2.73667	154.087	4.07	2.63	1.51	116.03	140	206.23		_
LOC_Os06g48020	5.54082	9.38e-69	3.17e-64	yes	up	0.4	19.8533	0.42	0.27	0.51	20.53	20.41	18.62		RecName: Full=Peroxidase 45; Short=Atperox P45; AltName: Full=ATP8a; Flags: Precursor
LOC_Os03g03790	5.72373	1.82e-67	6.15e-63	yes	up	1.20667	67.4833	1.32	0.84	1.46	81.57	84.32	36.56		RecName: Full=Butyrate--CoA ligase AAE11, peroxisomal; AltName: Full=Acyl-activating enzyme 11; AltName: Full=Butyryl-CoA synthetase
LOC_Os01g10850	3.28724	1.92e-67	6.48e-63	yes	up	6.88667	71.25	6.35	5.66	8.65	76.94	70.64	66.17		RecName: Full=Peroxidase 52; Short=Atperox P52; AltName: Full=ATP49; Flags: Precursor
LOC_Os09g03190	4.73725	1.94e-67	6.57e-63	yes	up	1.07333	26.7567	1.45	0.8	0.97	31.36	24.75	24.16		_
LOC_Os02g50860	2.60308	7.37e-67	2.49e-62	yes	up	15.49	100.153	14.75	14.36	17.36	106.99	98.03	95.44		RecName: Full=Rac-like GTP-binding protein 3; AltName: Full=OsRac3
LOC_Os06g03800	3.14596	2.4e-66	8.13e-62	yes	up	2.11	20.0867	2.27	2.06	2	21.17	19.68	19.41		RecName: Full=Probable E3 ubiquitin-protein ligase XBOS36; AltName: Full=Ankyrin repeat domain and RING finger-containing protein XBOS36; AltName: Full=XB3 protein
LOC_Os08g38700	2.94585	3.79e-63	1.28e-58	yes	up	3.65	29.99	3.33	3.99	3.63	26.58	30.88	32.51		RecName: Full=BTB/POZ domain-containing protein At1g55760
LOC_Os10g35950	7.54145	7.84e-63	2.65e-58	yes	up	0.163333	33	0.23	0.2	0.06	39.51	39.82	19.67		RecName: Full=Benzyl alcohol O-benzoyltransferase; AltName: Full=Benzoyl coenzyme A:benzyl alcohol benzoyl transferase
LOC_Os09g32988	3.58651	1.52e-61	5.13e-57	yes	up	2.21333	31.0267	1.3	3.25	2.09	33.41	29.04	30.63		_
LOC_Os03g58600	4.27802	6.28e-61	2.13e-56	yes	up	0.586667	11.25	0.51	0.51	0.74	13.49	11.21	9.05		RecName: Full=Protein argonaute MEL1; AltName: Full=Protein MEIOSIS ARRESTED AT LEPTOTENE 1; Short=OsMEL1
LOC_Os05g31140	5.49083	2.22e-60	7.5e-56	yes	up	1.76	86.3533	2.99	1.39	0.9	87	75.72	96.34		RecName: Full=Lichenase-2; AltName: Full=(1-)3,1-)4)-beta-glucanase isoenzyme EII; AltName: Full=Endo-beta-1,3-1,4 glucanase II; AltName: Full=Lichenase II; Flags: Pr
LOC_Os04g38570	2.01659	1.73e-58	5.85e-54	yes	up	19.31	82.6833	17.25	20.2	20.48	77.43	82.02	88.6		RecName: Full=ABC transporter B family member 19; Short=ABC transporter ABCB.19; Short=AtABCB19; AltName: Full=Multidrug resistance protein 11; AltName: Full=P-gly
LOC_Os01g19290	5.56219	5.01e-58	1.69e-53	yes	up	0.243333	12.38	0.25	0.25	0.23	14.03	11.87	11.24		RecName: Full=WAT1-related protein At1g09380
LOC_Os04g24600	3.24323	1.02e-57	3.45e-53	yes	up	1.88	19.0033	1.93	2.07	1.64	19.96	19.95	17.1		RecName: Full=Cysteine proteinase 1; Flags: Precursor
LOC_Os06g02530	3.49096	4.83e-57	1.64e-52	yes	up	22.12	265.55	15.81	28.51	22.04	250.73	229.66	316.26		_
LOC_Os06g51060	5.64667	9.84e-56	3.33e-51	yes	up	1.20667	63.89	1.27	0.37	1.98	61.79	60.39	69.49		RecName: Full=Chitinase 1; AltName: Full=Class I chitinase a; Short=OsChia1a; AltName: Full=Pathogenesis related (PR)-3 chitinase 1; Flags: Precursor
LOC_Os05g42240	4.75687	1.56e-55	5.29e-51	yes	up	0.74	21.3433	0.96	0.61	0.65	22.92	21.21	19.9		_
LOC_Os12g40419	2.97005	3.46e-55	1.17e-50	yes	up	2.21333	18.4733	2.45	2.1	2.09	17.85	20.74	16.83		RecName: Full=Wall-associated receptor kinase-like 21; Flags: Precursor
LOC_Os02g34710	4.49837	4.31e-54	1.46e-49	yes	up	0.75	17.93	0.45	0.98	0.82	20.03	17.48	16.28		_
LOC_Os10g38090	5.26504	1.85e-53	6.26e-49	yes	up	1.63333	67.5567	2.57	1.43	0.9	77.01	78.53	47.13		RecName: Full=Cytochrome P450 704C1; AltName: Full=Cytochrome P450 CYPD
LOC_Os01g63190	5.39732	5.12e-52	1.73e-47	yes	up	0.213333	9.69333	0.27	0.25	0.12	7.75	10.43	10.9		RecName: Full=Laccase-7; AltName: Full=Benzenediol:oxygen oxidoreductase 7; AltName: Full=Diphenol oxidase 7; AltName: Full=Urishiol oxidase 7; Flags: Precursor
LOC_Os04g40510	3.34287	9.11e-52	3.08e-47	yes	up	2.62667	28.05	2.02	2.34	3.52	29.93	30.23	23.99		_
LOC_Os06g03580	3.64937	2.25e-51	7.6e-47	yes	up	2.36667	22.3433	2.37	1.93	2.8	18.99	26.9	21.14		RecName: Full=E3 ubiquitin ligase BIG BROTHER; AltName: Full=Protein ENHANCER OF DA1-1
LOC_Os05g29010	2.13819	1.67e-50	5.65e-46	yes	up	12.2067	55.9267	10.72	13.44	12.46	56.56	52.74	58.48		RecName: Full=DNA primase small subunit; AltName: Full=DNA primase 49 kDa subunit; Short=p49
LOC_Os11g37950	6.93401	2.79e-50	9.43e-46	yes	up	0.253333	33.13	0.57	0.06	0.13	37.04	30.19	32.16		RecName: Full=Wheatwin-2; AltName: Full=Pathogenesis-related protein 4b; Flags: Precursor
LOC_Os10g07290	2.37358	4.52e-50	1.53e-45	yes	up	9.57	52.6767	8	10.22	10.49	48.93	50.26	58.84		RecName: Full=Glucan endo-1,3-beta-glucosidase 10; AltName: Full=(1-)3)-beta-glucan endohydrolase 10; Short=(1-)3)-beta-glucanase 10; AltName: Full=Beta-1,3-endogl
LOC_Os02g38970	2.02471	5.71e-50	1.93e-45	yes	up	18.1633	79.2333	16.85	19.57	18.07	80.05	83.95	73.7		RecName: Full=Ankyrin repeat and death domain-containing protein 1A
LOC_Os03g18190	3.28945	1.92e-49	6.48e-45	yes	up	1.73	17.97	1.31	1.88	2	19.61	20.41	13.89		_
LOC_Os05g34854	5.67985	2.53e-49	8.55e-45	yes	up	0.21	11.37	0.25	0.07	0.31	12.37	11.27	10.47		RecName: Full=Gibberellin 20 oxidase 2; AltName: Full=GA 20-oxidase 2; AltName: Full=Gibberellin C-20 oxidase 2; AltName: Full=Os20ox2; AltName: Full=Protein semi
LOC_Os02g55410	2.40369	5.23e-48	1.77e-43	yes	up	20.9933	117.997	19.58	25.13	18.27	113.35	112.15	128.49		RecName: Full=DNA replication licensing factor MCM5; AltName: Full=Minichromosome maintenance protein 5; Short=OsMCM5
LOC_Os07g26110	4.50969	1.15e-47	3.9e-43	yes	up	0.636667	15.62	0.98	0.45	0.48	15.23	16.09	15.54		RecName: Full=CASP-like protein Os07g0442900
LOC_Os08g01530	6.44726	2.69e-46	9.1e-42	yes	up	0.22	20	0.22	0.09	0.35	16.97	19.24	23.79		_
LOC_Os09g25620	2.72729	1.33e-45	4.5e-41	yes	up	8.46333	59.5633	8.43	7.91	9.05	69.33	62.45	46.91		RecName: Full=S-adenosylmethionine decarboxylase proenzyme; Short=AdoMetDC; Short=SAMDC; Contains: RecName: Full=S-adenosylmethionine decarboxylase alpha chain; Co
LOC_Os01g60770	3.53804	7.87e-45	2.66e-40	yes	up	5.95	74.3067	6.65	6.61	4.59	60.59	61.26	101.07		RecName: Full=Expansin-A2; AltName: Full=Alpha-expansin-2; AltName: Full=OsEXP2; AltName: Full=OsEXPA2; AltName: Full=OsaEXPa1.23; AltName: Full=RiExB; AltName: F
LOC_Os12g37400	2.82527	1.23e-44	4.16e-40	yes	up	10.59	79.97	10.64	13	8.13	78.99	71.6	89.32		RecName: Full=DNA replication licensing factor MCM7; AltName: Full=Minichromosome maintenance protein 7; Short=OsMCM7
LOC_Os08g01400	7.27738	3.14e-44	1.06e-39	yes	up	0.11	18.4033	0.07	0.18	0.08	18.93	17.32	18.96		_
LOC_Os05g06840	2.81621	1.46e-43	4.94e-39	yes	up	2.60333	18.8967	2.16	3.33	2.32	17.05	19.02	20.62		RecName: Full=DNA polymerase epsilon subunit 2; AltName: Full=DNA polymerase II subunit 2; AltName: Full=DNA polymerase epsilon subunit B
LOC_Os01g50622	2.36403	8.64e-42	2.92e-37	yes	up	5.94	33.23	4.62	6.5	6.7	33.5	33.83	32.36		RecName: Full=Bifunctional nuclease 1; Short=OsBBD1
LOC_Os06g51050	3.92504	2.54e-41	8.6e-37	yes	up	2.52333	40.9067	3.21	1.97	2.39	48.89	46.2	27.63		RecName: Full=Chitinase 3; AltName: Full=Basic endochitinase 1; AltName: Full=Class I chitinase c; Short=OsChia1c; AltName: Full=Pathogenesis related (PR)-3 chitina
LOC_Os06g07210	2.85797	2.67e-41	9.04e-37	yes	up	8.69	67.0633	8.29	11.24	6.54	66.83	60.55	73.81		RecName: Full=Ribonucleoside-diphosphate reductase large subunit; AltName: Full=Ribonucleoside-diphosphate reductase R1 subunit; Short=AtRNR1
LOC_Os03g29190	2.17438	2.13e-40	7.2e-36	yes	up	3.47	16.7133	3.54	3.42	3.45	15.56	16.97	17.61		RecName: Full=Probable nucleoredoxin 1-1; Short=OsNrx1-1
LOC_Os01g46570	2.15686	2.73e-40	9.22e-36	yes	up	19.9033	92.7767	16.67	21.04	22	103.7	92.62	82.01		RecName: Full=CTP synthase 2; AltName: Full=CTP synthetase 2; AltName: Full=UTP--ammonia ligase 2
LOC_Os02g49420	3.45688	3.05e-40	1.03e-35	yes	up	20.3567	237.03	11.82	23.39	25.86	221.5	200.48	289.11		RecName: Full=Fasciclin-like arabinogalactan protein 2; Flags: Precursor
LOC_Os01g49320	5.13325	6.75e-40	2.28e-35	yes	up	0.66	25.0667	1.04	0.55	0.39	25.93	33.68	15.59		RecName: Full=Acidic endochitinase; Flags: Precursor
LOC_Os06g16290	1.59991	1.09e-39	3.68e-35	yes	up	82.42	267.83	77.01	82.71	87.54	267.54	262.37	273.58		RecName: Full=H/ACA ribonucleoprotein complex subunit 2-like protein; AltName: Full=Nhp2-like protein
LOC_Os06g04870	2.36095	1.14e-39	3.86e-35	yes	up	10.3233	57.4933	11.93	9.45	9.59	58.86	63.68	49.94		RecName: Full=Homeobox-leucine zipper protein HOX2; AltName: Full=HD-ZIP protein HOX2; AltName: Full=Homeodomain transcription factor HOX2; AltName: Full=OsHox2
LOC_Os02g55260	2.82061	1.73e-39	5.84e-35	yes	up	1.68	12.59	1.26	2.12	1.66	12.82	12.67	12.28		RecName: Full=DEAD-box ATP-dependent RNA helicase 1
LOC_Os12g03822	1.94343	2.08e-39	7.03e-35	yes	up	7.45333	29.0467	7.72	6.88	7.76	28.91	27.18	31.05		RecName: Full=Glutamate-rich WD repeat-containing protein 1
LOC_Os11g37960	4.02913	3.13e-39	1.06e-34	yes	up	25.65	453.13	37.33	26.5	13.12	446.46	493.58	419.35		RecName: Full=Wheatwin-2; AltName: Full=Pathogenesis-related protein 4b; Flags: Precursor
LOC_Os02g02870	2.06431	4.09e-39	1.38e-34	yes	up	167.703	741.373	168.92	176.39	157.8	712.76	666.88	844.48		RecName: Full=Glycine-rich protein 2
LOC_Os11g01200	1.95397	7.98e-39	2.7e-34	yes	up	10.4333	42.3567	9.65	11.62	10.03	45.42	42.76	38.89		RecName: Full=Probable LRR receptor-like serine/threonine-protein kinase At1g67720; Flags: Precursor
LOC_Os09g21430	3.44425	8.13e-39	2.75e-34	yes	up	0.63	7.54667	0.37	0.75	0.77	6.83	7.73	8.08		RecName: Full=Zinc finger BED domain-containing protein DAYSLEEPER; AltName: Full=Transposase-like protein DAYSLEEPER
LOC_Os08g43730	2.75621	1.28e-38	4.33e-34	yes	up	2.47	17.6567	2.09	2.69	2.63	20.53	18.75	13.69		_
LOC_Os08g09350	1.61378	3.78e-38	1.28e-33	yes	up	68.44	222.537	64.52	72.2	68.6	227.04	231.92	208.65		RecName: Full=Nucleolin 1; AltName: Full=Protein NUCLEOLIN LIKE 1
LOC_Os09g31380	2.41084	4.92e-38	1.66e-33	yes	up	3.32333	18.7933	3.33	3.17	3.47	19.63	20.3	16.45		RecName: Full=Lysine-specific demethylase 8; AltName: Full=JmjC domain-containing protein 5; AltName: Full=Jumonji domain-containing protein 5
LOC_Os02g35060	2.0911	5.16e-38	1.75e-33	yes	up	7.33	33.1533	6.24	7.21	8.54	31.61	34.98	32.87		RecName: Full=tRNA (guanine(10)-N2)-methyltransferase homolog; AltName: Full=tRNA guanosine-2'-O-methyltransferase TRM11 homolog
LOC_Os12g17950	6.16039	9.74e-38	3.3e-33	yes	up	0.23	17.97	0.31	0.3	0.08	10.49	16.28	27.14		_
LOC_Os04g41040	2.32442	1.63e-37	5.53e-33	yes	up	11.98	62.42	9.18	14	12.76	58.87	62.5	65.89		RecName: Full=DNA-directed RNA polymerases II and IV subunit 5A; Short=RPB5a; AltName: Full=DNA-directed RNA polymerase II subunit E; AltName: Full=RNA polymerase
LOC_Os04g10650	2.15803	1.98e-37	6.69e-33	yes	up	7.80333	37.03	7.03	8.7	7.68	33.55	34.03	43.51		RecName: Full=CDT1-like protein a, chloroplastic; Short=AtCDT1a; Flags: Precursor
LOC_Os01g09590	3.02664	3.22e-37	1.09e-32	yes	up	4.55667	39.6967	3.54	5.92	4.21	33.09	37.2	48.8		RecName: Full=Transcription factor RAX2; AltName: Full=Myb-related protein 38; Short=AtMYB38; AltName: Full=Protein REGULATOR OF AXILLARY MERISTEMS 2
LOC_Os08g44270	7.40229	5.75e-37	1.94e-32	yes	up	3.58	656.56	6.04	3.42	1.28	635.31	723.22	611.15		RecName: Full=KDEL-tailed cysteine endopeptidase CEP1; AltName: Full=Cysteine proteinase CP56; Short=AtCP56; Flags: Precursor
LOC_Os11g30210	2.84608	5.96e-37	2.02e-32	yes	up	0.436667	3.33333	0.37	0.52	0.42	3.48	3.51	3.01		RecName: Full=Disease resistance protein At4g27190
LOC_Os03g63580	4.89338	1.11e-36	3.75e-32	yes	up	0.696667	22.46	1.3	0.48	0.31	19.41	21.29	26.68		RecName: Full=Non-specific phospholipase C4
LOC_Os05g14940	2.38667	1.33e-36	4.51e-32	yes	up	2.61333	14.46	2.15	3.05	2.64	15.03	15.32	13.03		RecName: Full=Zinc finger BED domain-containing protein RICESLEEPER 1; AltName: Full=Transposase-like protein RICESLEEPER 1
LOC_Os01g24030	4.52544	1.84e-36	6.22e-32	yes	up	0.286667	6.95667	0.16	0.39	0.31	8.37	7.04	5.46		RecName: Full=Probable acyl-activating enzyme 2; AltName: Full=AMP-binding protein 2; Short=AtAMPBP2
LOC_Os02g30850	6.75214	2.44e-36	8.25e-32	yes	up	0.19	22.12	0.09	0.32	0.16	27.87	25.56	12.93		RecName: Full=Glutaredoxin-C3; AltName: Full=Protein ROXY 2
LOC_Os09g29600	2.35887	2.71e-36	9.16e-32	yes	up	6.76667	27.9967	6.41	6.54	7.35	28.95	30.89	24.15		RecName: Full=Wall-associated receptor kinase 3; Flags: Precursor
LOC_Os02g40330	4.58303	4.94e-36	1.67e-31	yes	up	0.34	11.0567	0.52	0.26	0.24	13.9	12.65	6.62		_
LOC_Os05g49840	5.84584	8.23e-36	2.78e-31	yes	up	0.156667	9.69	0.26	0.16	0.05	11.87	11.55	5.65		RecName: Full=Phospholipase A1-II 7
LOC_Os04g38620	2.01369	1.22e-35	4.11e-31	yes	up	24.3367	105.12	20.11	26.51	26.39	112.22	105.37	97.77		RecName: Full=NAP1-related protein 1; AltName: Full=Protein SET homolog 1
LOC_Os08g42630	3.07252	1.44e-35	4.88e-31	yes	up	3.32667	29.91	3.92	2.34	3.72	29.77	32.83	27.13		_
LOC_Os06g05090	1.89215	1.72e-35	5.81e-31	yes	up	20.82	82.18	18.86	22.81	20.79	90.23	79.88	76.43		RecName: Full=Protein arginine N-methyltransferase PRMT10
LOC_Os08g34984	3.34977	2.23e-35	7.54e-31	yes	up	1.36333	14.94	1.48	1.36	1.25	14.77	16.69	13.36		_
LOC_Os10g25450	3.07813	2.33e-35	7.87e-31	yes	up	5.95	53.6367	3.52	8.32	6.01	52.49	51.91	56.51		RecName: Full=Subtilisin-like protease; AltName: Full=Cucumisin-like serine protease; Flags: Precursor
LOC_Os09g39410	1.83281	2.66e-35	8.98e-31	yes	up	8.81	33.34	8.12	9.55	8.76	34.24	34.59	31.19		RecName: Full=Alcohol-forming fatty acyl-CoA reductase
LOC_Os05g51830	1.37468	2.92e-35	9.88e-31	yes	up	141.71	391.55	135.85	145.74	143.54	393.7	387.4	393.55		RecName: Full=Histone deacetylase HDT3; AltName: Full=Histone deacetylase 2c; Short=HD2c; AltName: Full=Zm-HD2c
LOC_Os08g03350	2.35276	3.26e-35	1.1e-30	yes	up	24.1767	129.81	22.66	26.73	23.14	126.18	159.41	103.84		RecName: Full=Lysine histidine transporter 1
LOC_Os05g14590	2.33301	9.59e-35	3.24e-30	yes	up	16.6067	88.99	15.37	20.97	13.48	84.13	85.84	97		RecName: Full=DNA replication licensing factor MCM6; AltName: Full=Minichromosome maintenance protein 6; Short=OsMCM6
LOC_Os01g49310	3.1101	1.26e-34	4.25e-30	yes	up	0.903333	8.10667	0.8	0.86	1.05	8.05	10.14	6.13		_
LOC_Os02g56130	2.30294	1.29e-34	4.37e-30	yes	up	53.9367	283.79	43.59	66.12	52.1	259.43	255.97	335.97		RecName: Full=Proliferating cell nuclear antigen; Short=PCNA; AltName: Full=Cyclin
LOC_Os02g40010	2.08192	1.51e-34	5.09e-30	yes	up	58.0667	263.023	66.58	56.02	51.6	257.27	287.01	244.79		RecName: Full=Adenine phosphoribosyltransferase 2; Short=APRT 2
LOC_Os06g10530	3.24025	1.82e-34	6.14e-30	yes	up	5.02333	50.85	5.13	4.18	5.76	55.26	58.56	38.73		_
LOC_Os07g41180	1.60375	2.23e-34	7.55e-30	yes	up	16.59	53.5633	15.91	15.88	17.98	54.63	50.84	55.22		RecName: Full=Caprin homolog
LOC_Os12g13950	2.47953	5.49e-34	1.86e-29	yes	up	4.54	27.7667	3.55	5.76	4.31	25.39	25.2	32.71		_
LOC_Os07g48330	4.33827	7.26e-34	2.46e-29	yes	up	1.34	30.0567	2.35	1.01	0.66	27.84	30.71	31.62		RecName: Full=Cytochrome P450 714B1; AltName: Full=GA 13-oxidase 1; AltName: Full=Gibberellin 13 oxidase 1
LOC_Os05g11980	2.26417	1.61e-33	5.45e-29	yes	up	3.91	19.96	3.91	4.7	3.12	20.54	18.68	20.66		_
LOC_Os03g02874	5.79242	3.99e-33	1.35e-28	yes	up	0.16	14.1567	0.2	0.23	0.05	8.3	9.17	25		_
LOC_Os10g30280	2.72971	4.21e-33	1.42e-28	yes	up	6.29333	44.29	4.08	7.78	7.02	41.13	42.44	49.3		RecName: Full=F-box protein At4g35930
LOC_Os10g38740	3.08726	5.54e-33	1.87e-28	yes	up	4.38667	39.8233	5.33	3.55	4.28	35.39	52.84	31.24		RecName: Full=Probable glutathione S-transferase GSTU6; AltName: Full=28 kDa cold-induced protein
LOC_Os12g03470	2.81633	7.46e-33	2.52e-28	yes	up	23.4533	176.28	29.96	22.92	17.48	194.87	187.36	146.61		RecName: Full=Alpha-L-arabinofuranosidase 1; Short=AtASD1; AltName: Full=Beta-D-xylosidase; Flags: Precursor
LOC_Os01g21070	3.81956	8.31e-33	2.81e-28	yes	up	0.966667	14.3367	0.4	1.09	1.41	14.5	13.24	15.27		RecName: Full=Endoglucanase 3; AltName: Full=Endo-1,4-beta glucanase 3; AltName: Full=OsGLU8; Flags: Precursor
LOC_Os11g03730	2.75709	1.12e-32	3.78e-28	yes	up	13.2933	98.5067	14.31	13.07	12.5	120.95	108.91	65.66		RecName: Full=Alpha-L-arabinofuranosidase 1; Short=AtASD1; AltName: Full=Beta-D-xylosidase; Flags: Precursor
LOC_Os01g05630	2.28503	2.04e-32	6.89e-28	yes	up	52.1967	273.833	47.13	54.92	54.54	245.85	220.55	355.1		RecName: Full=Histone H2B.4
LOC_Os01g36390	2.56689	3.1e-32	1.05e-27	yes	up	18.6467	117.86	19.59	23.22	13.13	116.75	110.97	125.86		RecName: Full=DNA replication licensing factor MCM4; AltName: Full=Minichromosome maintenance protein 4; Short=OsMCM4
LOC_Os12g06200	1.65549	6.07e-32	2.05e-27	yes	up	12.2867	40.23	10.68	13.5	12.68	39.2	41.31	40.18		RecName: Full=Transcription factor E2FA; AltName: Full=E2F transcription factor-3; Short=AtE2F3
LOC_Os02g01332	1.35236	6.91e-32	2.34e-27	yes	up	136.507	373.157	135.97	138.46	135.09	365.22	378.76	375.49		RecName: Full=60S ribosomal protein L9
LOC_Os04g43910	1.68723	1.09e-31	3.7e-27	yes	up	8.78	30.0933	8.74	8.51	9.09	32.45	28.82	29.01		RecName: Full=Auxin response factor 10 ARFJ_ORYSJ RecName: Full=Auxin response factor 10
LOC_Os02g54520	4.08411	1.56e-31	5.29e-27	yes	up	0.516667	9.34667	0.47	0.49	0.59	6.75	7.63	13.66		RecName: Full=Transcription factor RAX3; AltName: Full=Myb-related protein 84; Short=AtMYB84; AltName: Full=Protein REGULATOR OF AXILLARY MERISTEMS 3
LOC_Os07g12250	1.60677	1.98e-31	6.69e-27	yes	up	115.527	377.603	110.08	108.67	127.83	370.35	346.86	415.6		RecName: Full=60S ribosomal protein L24
LOC_Os04g52960	1.32884	2.06e-31	6.98e-27	yes	up	74.5133	198.873	70.95	78.48	74.11	199.7	194.97	201.95		RecName: Full=Nucleolin 2; AltName: Full=Protein NUCLEOLIN LIKE 2
LOC_Os04g39880	4.7543	6.76e-31	2.28e-26	yes	up	1.64333	28.7167	1.71	1.69	1.53	32.09	35.49	18.57		RecName: Full=Beta-glucosidase 12; Short=Os4bglu12; Flags: Precursor
LOC_Os01g52880	3.36909	8.3e-31	2.81e-26	yes	up	2.22	24.3267	1.22	2.84	2.6	21.24	20.95	30.79		RecName: Full=Probable LRR receptor-like serine/threonine-protein kinase At4g36180; Flags: Precursor
LOC_Os07g43604	4.25782	1.02e-30	3.46e-26	yes	up	0.293333	5.88667	0.25	0.41	0.22	5.62	5.28	6.76		_
LOC_Os01g68790	1.48841	1.67e-30	5.65e-26	yes	up	133.457	399.36	128.91	128.06	143.4	388.02	430.48	379.58		RecName: Full=Glycine-rich RNA-binding protein 3, mitochondrial; Short=AtGR-RBP3; AltName: Full=AtRBG3; AltName: Full=Mitochondrial RNA-binding protein 2a; Short=At
LOC_Os05g45450	3.96919	1.72e-30	5.83e-26	yes	up	1.29667	21.8567	1.89	0.69	1.31	20.26	24.11	21.2		_
LOC_Os02g50330	2.60358	2.92e-30	9.87e-26	yes	up	1.59	10.23	1.18	1.96	1.63	8.3	11.82	10.57		RecName: Full=Probable RNA-dependent RNA polymerase 1; Short=OsRDR1
LOC_Os11g04070	2.06177	3.33e-30	1.13e-25	yes	up	9.26	41.15	8.43	9.91	9.44	45.26	42.02	36.17		RecName: Full=60S acidic ribosomal protein P0
LOC_Os01g38580	5.06077	3.62e-30	1.22e-25	yes	up	0.196667	6.83667	0.1	0.38	0.11	4.76	8.97	6.78		RecName: Full=Carotenoid cleavage dioxygenase 8 homolog A, chloroplastic; Short=OsCCD8a; AltName: Full=Protein D10-like; Flags: Precursor
LOC_Os09g17850	2.54777	3.68e-30	1.25e-25	yes	up	7.24667	45.23	6.89	8	6.85	37.75	36.91	61.03		RecName: Full=Probable histone acetyltransferase type B catalytic subunit; AltName: Full=HAT B
LOC_Os06g11290	3.4417	3.91e-30	1.32e-25	yes	up	1.12667	12.9767	1.09	0.95	1.34	12.39	16.88	9.66		RecName: Full=12-oxophytodienoate reductase 1; AltName: Full=12-oxophytodienoate-10,11-reductase 1; Short=OPDA-reductase 1; Short=OsOPR1
LOC_Os11g03780	2.18933	3.92e-30	1.33e-25	yes	up	19.5533	92.55	18.85	21.03	18.78	106.52	99.6	71.53		RecName: Full=Alpha-L-arabinofuranosidase 1; Short=AtASD1; AltName: Full=Beta-D-xylosidase; Flags: Precursor
LOC_Os05g13300	2.46348	5.02e-30	1.7e-25	yes	up	1.73	10.2233	1.51	2.05	1.63	9.62	8.51	12.54		RecName: Full=ATP-dependent RNA helicase chl1; AltName: Full=Chromosome loss protein 1
LOC_Os09g36080	4.68608	5.85e-30	1.98e-25	yes	up	0.356667	9.85667	0.61	0.14	0.32	10.21	12.19	7.17		RecName: Full=Cytochrome P450 71A1; AltName: Full=ARP-2; AltName: Full=CYPLXXIA1
LOC_Os05g48840	3.59459	1.28e-29	4.32e-25	yes	up	5.54333	72.38	8.79	3.62	4.22	78.16	78.36	60.62		_
LOC_Os10g19919	9.15712	1.46e-29	4.93e-25	yes	up	0.0266667	25.6067	0.02	0.04	0.02	15.79	17.94	43.09		_
LOC_Os03g40070	2.78309	2.11e-29	7.15e-25	yes	up	2.63667	19.5	3.04	3.06	1.81	19.56	18.59	20.35		RecName: Full=Isoaspartyl peptidase/L-asparaginase 1; AltName: Full=L-asparagine amidohydrolase 1; Contains: RecName: Full=Isoaspartyl peptidase/L-asparaginase 1 s
LOC_Os03g25450	1.55669	2.94e-29	9.96e-25	yes	up	25.64	80.0433	22.17	28.61	26.14	81.2	75.95	82.98		RecName: Full=H/ACA ribonucleoprotein complex subunit 4; AltName: Full=CBF5 homolog; AltName: Full=Dyskerin; AltName: Full=Nopp-140-associated protein of 57 kDa hom
LOC_Os09g19560	1.41887	3.23e-29	1.09e-24	yes	up	33.22	94.4633	31.81	35	32.85	97.54	94.34	91.51		RecName: Full=Probable protein arginine N-methyltransferase 1
LOC_Os07g43540	2.23201	3.38e-29	1.14e-24	yes	up	5.82667	29.1667	5.16	5.33	6.99	26.72	27.59	33.19		RecName: Full=Origin recognition complex subunit 6
LOC_Os03g38350	3.62148	3.82e-29	1.29e-24	yes	up	5.71	69.6833	7.57	3.6	5.96	51.35	54.45	103.25		_
LOC_Os09g19710	1.68777	4.01e-29	1.36e-24	yes	up	109.013	374.233	106.21	112.22	108.61	419.35	374.33	329.02		RecName: Full=Hypersensitive-induced response protein 1; Short=AtHIR1
LOC_Os08g42440	1.97528	5.08e-29	1.72e-24	yes	up	6.23333	26.1433	7	5.72	5.98	25.12	28.77	24.54		RecName: Full=Zinc finger protein CONSTANS-LIKE 15
LOC_Os10g40290	6.65657	9.01e-29	3.05e-24	yes	up	0.0566667	6.27667	0.07	0.07	0.03	5.73	6.44	6.66		_
LOC_Os05g08360	1.50507	1.49e-28	5.04e-24	yes	up	75.0633	224.043	69.33	73.44	82.42	208.17	245.71	218.25		RecName: Full=Mediator of RNA polymerase II transcription subunit 36a; AltName: Full=Fibrillarin-like protein 2; AltName: Full=Histone-glutamine methyltransferase;
LOC_Os06g43220	3.53149	3e-28	1.01e-23	yes	up	1.29333	15.7233	0.63	1.63	1.62	18.38	16.94	11.85		RecName: Full=Floral homeotic protein APETALA 2
LOC_Os02g43870	1.91465	3.66e-28	1.24e-23	yes	up	4.38	17.6333	4.66	4.56	3.92	16.83	17.66	18.41		RecName: Full=Putative kinase-like protein TMKL1; Flags: Precursor
LOC_Os02g03030	2.99231	5.16e-28	1.74e-23	yes	up	2.68667	23.6267	1.83	3.39	2.84	21.71	19.04	30.13		RecName: Full=Histone-lysine N-methyltransferase ATXR6; AltName: Full=Protein SET DOMAIN GROUP 34; AltName: Full=Trithorax-related protein 6; Short=TRX-related pro
LOC_Os05g24550	1.59588	5.94e-28	2.01e-23	yes	up	73.78	237.137	80.34	74.74	66.26	226.86	240.41	244.14		RecName: Full=Cathepsin B; AltName: Full=Cathepsin B1; Flags: Precursor
LOC_Os05g39850	2.44442	7.09e-28	2.4e-23	yes	up	18.21	105.627	18.05	23.8	12.78	102.65	101.3	112.93		RecName: Full=DNA replication licensing factor MCM3; AltName: Full=Minichromosome maintenance protein 3; Short=OsMCM3
LOC_Os01g07500	4.40125	7.99e-28	2.7e-23	yes	up	0.35	7.65333	0.44	0.34	0.27	8.37	10.41	4.18		RecName: Full=Tryptophan aminotransferase-related protein 2
LOC_Os09g31031	2.89209	9.11e-28	3.08e-23	yes	up	13.34	108.067	12.59	12.86	14.57	88.32	76.63	159.25		RecName: Full=Polyubiquitin 3; Contains: RecName: Full=Ubiquitin; Flags: Precursor
LOC_Os05g42350	1.32402	9.2e-28	3.11e-23	yes	up	36.15	96.3067	36.47	36.83	35.15	94.89	94.57	99.46		RecName: Full=Sulfite reductase
LOC_Os09g32976	1.35095	9.27e-28	3.13e-23	yes	up	250.697	682.453	249.34	250.84	251.91	721.96	635.95	689.45		RecName: Full=60S ribosomal protein L7a
LOC_Os02g48870	3.0046	9.33e-28	3.16e-23	yes	up	2.56	21.9133	2.92	1.64	3.12	16.4	25.32	24.02		RecName: Full=Protein ASPARTIC PROTEASE IN GUARD CELL 2; Short=AtASPG2; Flags: Precursor
LOC_Os02g57360	3.35778	1.01e-27	3.41e-23	yes	up	0.663333	8.23667	0.57	0.75	0.67	7.79	8.5	8.42		_
LOC_Os01g38229	3.73175	1.07e-27	3.63e-23	yes	up	0.683333	9.7	0.52	1.11	0.42	9.87	11.66	7.57		RecName: Full=70 kDa peptidyl-prolyl isomerase; AltName: Full=Peptidyl-prolyl cis-trans isomerase; Short=PPIase; AltName: Full=Rotamase
LOC_Os11g03590	2.36536	1.17e-27	3.97e-23	yes	up	2.65333	14.52	2.36	2.9	2.7	15.44	12.11	16.01		_
LOC_Os04g57880	5.45749	1.27e-27	4.29e-23	yes	up	0.12	5.68667	0.13	0.13	0.1	5.52	8.7	2.84		_
LOC_Os12g03860	2.53761	1.39e-27	4.7e-23	yes	up	2.82667	17.23	3.39	2.68	2.41	16.19	16.76	18.74		RecName: Full=Protein ZINC INDUCED FACILITATOR-LIKE 1; AltName: Full=Protein ZIF-LIKE 1
LOC_Os01g59730	2.05931	1.45e-27	4.9e-23	yes	up	11.2733	50.3067	11.15	10.19	12.48	52.18	51.69	47.05		RecName: Full=60S ribosomal protein L30
LOC_Os06g33200	3.3612	1.54e-27	5.22e-23	yes	up	2.25667	24.7667	2	1.69	3.08	27.39	20.25	26.66		_
LOC_Os03g53800	1.60412	1.74e-27	5.87e-23	yes	up	44.47	143.547	44.78	46.72	41.91	132.98	161.85	135.81		RecName: Full=Lysosomal beta glucosidase; Flags: Precursor
LOC_Os08g32540	2.02614	2.03e-27	6.86e-23	yes	up	8.27	34.15	7.08	7.29	10.44	33.82	37.36	31.27		RecName: Full=Cyclin-D1-2; AltName: Full=G1/S-specific cyclin-D1-2; Short=CycD1;2
LOC_Os07g12650	1.28962	2.21e-27	7.47e-23	yes	up	244.117	640.273	252.3	242.03	238.02	642.81	615.76	662.25		RecName: Full=40S ribosomal protein S12
LOC_Os01g50970	2.30851	2.56e-27	8.65e-23	yes	up	1.97	10.4033	1.82	2.22	1.87	9.94	9.11	12.16		_
LOC_Os02g44730	3.69307	2.66e-27	9e-23	yes	up	0.383333	3.81667	0.15	0.42	0.58	3.64	4.19	3.62		RecName: Full=Hippocampus abundant transcript-like protein 1
LOC_Os04g15920	3.43028	2.91e-27	9.85e-23	yes	up	2.22667	25.5767	2.67	2.02	1.99	30.78	31.43	14.52		RecName: Full=Probable cinnamyl alcohol dehydrogenase 6; Short=OsCAD6
LOC_Os01g01170	3.27347	3.02e-27	1.02e-22	yes	up	2.82667	29.0333	1.83	4.49	2.16	25.59	26.14	35.37		_
LOC_Os09g28200	2.73076	3.15e-27	1.07e-22	yes	up	1.48	10.4167	1.35	1.2	1.89	10.33	8.92	12		RecName: Full=Heat stress transcription factor B-4c; AltName: Full=Heat stress transcription factor 22; Short=OsHsf-22
LOC_Os06g24490	9.19613	5.49e-27	1.86e-22	yes	up	0.0366667	24.3667	0.11	0	0	23.62	25.59	23.89		_
LOC_Os01g08770	1.58945	6.18e-27	2.09e-22	yes	up	9.00667	28.8267	8.95	9.62	8.45	29.02	29.96	27.5		RecName: Full=Probable U3 small nucleolar RNA-associated protein 7; Short=U3 snoRNA-associated protein 7; AltName: Full=U three protein 7
LOC_Os07g12890	4.3991	6.43e-27	2.17e-22	yes	up	0.5	11.0867	0.47	0.28	0.75	11.98	14.53	6.75		RecName: Full=Zinc transporter 8; AltName: Full=ZRT/IRT-like protein 8; Short=OsZIP8; Flags: Precursor
LOC_Os04g44230	3.91616	9.43e-27	3.19e-22	yes	up	0.33	5.26	0.46	0.22	0.31	4.87	4.91	6		RecName: Full=Cytokinin dehydrogenase 8; AltName: Full=Cytokinin oxidase 8; Short=OsCKX8; Flags: Precursor CKX8_ORYSJ RecName: Full=Cytoki
LOC_Os01g07260	2.22909	9.53e-27	3.22e-22	yes	up	19.8	98.7033	17.09	26.5	15.81	96.58	94.55	104.98		RecName: Full=Mini-chromosome maintenance complex-binding protein; Short=MCM-BP; Short=MCM-binding protein; AltName: Full=Protein E2F TARGET GENE 1
LOC_Os12g21798	1.36477	1.18e-26	3.99e-22	yes	up	86.9033	239.01	91.35	84.67	84.69	240.65	238.84	237.54		RecName: Full=40S ribosomal protein S3a; AltName: Full=CYC07 protein
LOC_Os03g18850	3.0049	1.21e-26	4.09e-22	yes	up	2.32667	20.21	2.76	2.51	1.71	17.53	18.55	24.55		RecName: Full=Pathogenesis-related protein 1; Short=AOPR1
LOC_Os03g57870	1.58304	1.39e-26	4.69e-22	yes	up	10.7933	34.4033	10.05	11.81	10.52	34.21	31.77	37.23		RecName: Full=Replication factor C subunit 5; Short=OsRFC5; AltName: Full=Activator 1 subunit 5
LOC_Os02g53690	2.15155	1.41e-26	4.76e-22	yes	up	17.9033	84.5233	18.88	13.92	20.91	96.16	83.97	73.44		RecName: Full=Growth-regulating factor 1; Short=OsGRF1; AltName: Full=Transcription activator GRF1
LOC_Os09g25100	2.82232	2.01e-26	6.81e-22	yes	up	1.15667	8.78	1.39	1.06	1.02	7.95	8.34	10.05		RecName: Full=Putative CBL-interacting protein kinase 27; AltName: Full=OsCIPK27
LOC_Os01g08320	2.19439	2.1e-26	7.1e-22	yes	up	4.42333	21.3233	4.51	4.31	4.45	23.11	23.3	17.56		RecName: Full=Auxin-responsive protein IAA1; AltName: Full=Indoleacetic acid-induced protein 1
LOC_Os07g29320	1.40836	2.14e-26	7.22e-22	yes	up	22.9167	64.79	21.15	24.67	22.93	64.12	65.94	64.31		RecName: Full=Probable rRNA-processing protein EBP2 homolog
LOC_Os11g07500	1.59821	2.39e-26	8.09e-22	yes	up	8.24	26.49	8.66	8.66	7.4	26.56	27.09	25.82		RecName: Full=Superkiller viralicidic activity 2-like 2; AltName: Full=ATP-dependent RNA helicase SKIV2L2; AltName: Full=TRAMP-like complex helicase
LOC_Os01g65130	3.59054	3.07e-26	1.04e-21	yes	up	0.746667	8.07333	1.08	0.46	0.7	8.26	10.18	5.78		RecName: Full=Protein NRT1/ PTR FAMILY 5.11; Short=AtNPF5.11
LOC_Os02g50340	3.13716	3.34e-26	1.13e-21	yes	up	0.536667	5.06667	0.68	0.44	0.49	4.47	5.7	5.03		RecName: Full=MACPF domain-containing protein At1g14780
LOC_Os02g54110	1.37694	4.2e-26	1.42e-21	yes	up	11.88	32.7533	11.3	12.76	11.58	32.5	31.04	34.72		RecName: Full=RRP12-like protein
LOC_Os01g27730	1.40984	4.78e-26	1.62e-21	yes	up	32.1233	91.2333	34.11	31.95	30.31	91.95	90.17	91.58		RecName: Full=Guanine nucleotide-binding protein-like 3 homolog
LOC_Os03g15810	2.50316	5.56e-26	1.88e-21	yes	up	1.94667	12.39	1.59	2.48	1.77	10.24	10.57	16.36		RecName: Full=Chromosome transmission fidelity protein 18 homolog
LOC_Os01g05064	3.5544	6e-26	2.03e-21	yes	up	3.46333	44.12	4.47	1.97	3.95	34.23	37.34	60.79		_
LOC_Os11g34130	1.92641	7.57e-26	2.56e-21	yes	up	2.99	11.7133	2.31	3.25	3.41	11.88	12.37	10.89		RecName: Full=Uncharacterized protein At3g49140
LOC_Os01g40110	1.5385	1.27e-25	4.3e-21	yes	up	11.5967	35.8933	10.74	11.69	12.36	35.34	34.33	38.01		RecName: Full=UBP1-associated proteins 1C
LOC_Os02g40510	1.54245	1.3e-25	4.39e-21	yes	up	14.4867	45.0433	14.68	14.91	13.87	45.8	48.56	40.77		RecName: Full=Two-component response regulator-like PRR1; AltName: Full=Pseudo-response regulator 1; Short=OsPRR1
LOC_Os01g60810	2.54244	1.41e-25	4.78e-21	yes	up	4.34	27.1333	5.73	4.03	3.26	26.63	30.05	24.72		RecName: Full=Transcription repressor OFP2; AltName: Full=Ovate family protein 2; Short=AtOFP2
LOC_Os04g45890	7.34882	1.45e-25	4.91e-21	yes	up	0.0266667	6.32333	0	0.01	0.07	5.16	3.82	9.99		_
LOC_Os03g10040	3.20174	1.49e-25	5.04e-21	yes	up	2.38333	23.3167	2.13	2.04	2.98	21.76	31.33	16.86		RecName: Full=F-box protein SNE; AltName: Full=Protein SNEEZY; AltName: Full=Sleepy protein 2
LOC_Os04g13160	2.19622	1.52e-25	5.15e-21	yes	up	7.04667	34.2767	5.28	8.89	6.97	30.74	32.02	40.07		RecName: Full=F-box/LRR-repeat protein 13
LOC_Os10g26280	2.37319	1.75e-25	5.91e-21	yes	up	2.87333	15.5033	2.15	3.17	3.3	12.49	14.39	19.63		_
LOC_Os08g42600	2.15695	1.88e-25	6.35e-21	yes	up	11.16	41.5333	7.15	18.9	7.43	41.98	39.19	43.43		RecName: Full=Retinoblastoma-related protein 1; Short=OsRBR1
LOC_Os01g47300	6.30447	1.91e-25	6.47e-21	yes	up	0.0933333	9.92	0.18	0.06	0.04	7.63	7.08	15.05		_
LOC_Os03g09940	3.43511	1.95e-25	6.6e-21	yes	up	0.793333	9.02667	0.35	1.01	1.02	7.74	8.1	11.24		RecName: Full=Sulfate transporter 2.1; AltName: Full=AST68
LOC_Os07g49230	1.75563	1.97e-25	6.67e-21	yes	up	4.21667	15.1867	4.51	4.22	3.92	16.5	15.21	13.85		RecName: Full=Ubiquitin-activating enzyme E1 3
LOC_Os04g52780	3.76585	1.99e-25	6.74e-21	yes	up	0.283333	4.15667	0.42	0.26	0.17	4.11	5.39	2.97		RecName: Full=LRR receptor-like serine/threonine-protein kinase FLS2; AltName: Full=Protein FLAGELLIN-SENSING 2; AltName: Full=Protein FLAGELLIN-SENSITIVE 2; Flags:
LOC_Os07g27390	4.50246	2.24e-25	7.59e-21	yes	up	0.566667	16.88	1.06	0.61	0.03	15.66	15.63	19.35		_
LOC_Os02g56100	2.53363	2.36e-25	7.97e-21	yes	up	3.07667	18.97	2.83	4.06	2.34	16.78	16.51	23.62		RecName: Full=Ribonucleoside-diphosphate reductase large subunit; AltName: Full=Ribonucleoside-diphosphate reductase R1 subunit; Short=AtRNR1
LOC_Os03g10500	2.20821	3.15e-25	1.06e-20	yes	up	21.9533	111.697	28.31	19.64	17.91	111.58	103.48	120.03		RecName: Full=Adenylyl-sulfate kinase 3; AltName: Full=ATP adenosine-5'-phosphosulfate 3'-phosphotransferase 3; AltName: Full=Adenosine-5'-phosphosulfate kinase 3;
LOC_Os09g36900	2.65382	3.3e-25	1.11e-20	yes	up	12.03	81.0267	11.49	14.99	9.61	67.08	63.25	112.75		RecName: Full=WD-40 repeat-containing protein MSI2
LOC_Os03g54890	1.2029	3.49e-25	1.18e-20	yes	up	321.183	789.717	304.62	325.43	333.5	817.43	750.57	801.15		RecName: Full=60S ribosomal protein L13a-4
LOC_Os01g61860	1.50057	3.49e-25	1.18e-20	yes	up	24.4767	73.58	25.08	25.29	23.06	78.19	75.56	66.99		RecName: Full=TBC1 domain family member 8; AltName: Full=BUB2-like protein 1; AltName: Full=Vascular Rab-GAP/TBC-containing protein
LOC_Os10g38940	2.89706	3.99e-25	1.35e-20	yes	up	6.80333	53.2067	3.74	9.23	7.44	55.84	57.77	46.01		RecName: Full=Beta-carotene 3-hydroxylase, chloroplastic; Short=GenCHYB; Flags: Precursor
LOC_Os07g22400	2.36873	4.4e-25	1.49e-20	yes	up	8.08667	45.95	6.99	10.8	6.47	39.93	42.13	55.79		RecName: Full=Probable DNA primase large subunit
LOC_Os01g51620	2.70494	4.69e-25	1.59e-20	yes	up	0.963333	6.39667	0.78	1.04	1.07	7.45	6	5.74		RecName: Full=KRR1 small subunit processome component homolog; AltName: Full=KRR-R motif-containing protein 1; AltName: Full=Ribosomal RNA assembly protein mis3
LOC_Os02g58220	2.68005	4.72e-25	1.6e-20	yes	up	15.24	102.993	11.01	20.73	13.98	86.3	84.62	138.06		RecName: Full=Replication protein A 32 kDa subunit A; Short=OsRPA32A; AltName: Full=OsRPA32-1; AltName: Full=Replication factor A protein 2A; AltName: Full=Replica
LOC_Os03g06980	1.47404	5.05e-25	1.71e-20	yes	up	33.96	98.1967	29.84	34.65	37.39	105.39	94.89	94.31		RecName: Full=Heterogeneous nuclear ribonucleoprotein A3; Short=hnRNP A3
LOC_Os02g10220	1.85303	5.76e-25	1.95e-20	yes	up	24.88	95.8433	20.83	27.86	25.95	83.77	88.1	115.66		RecName: Full=Chaperone protein dnaJ 6; Short=AtDjC6; Short=AtJ6
LOC_Os07g47420	1.57023	8.05e-25	2.72e-20	yes	up	41.51	131.847	42.7	36.57	45.26	138.94	124.16	132.44		RecName: Full=60S ribosome subunit biogenesis protein NIP7 homolog
LOC_Os01g64090	1.30204	1.71e-24	5.77e-20	yes	up	41.92	110.263	42.34	41.12	42.3	112.52	108.2	110.07		RecName: Full=60S ribosomal protein L10a-1
LOC_Os11g08330	1.97289	1.9e-24	6.42e-20	yes	up	7.92667	32.9967	6.44	9.78	7.56	29.52	30.28	39.19		RecName: Full=DNA polymerase delta catalytic subunit
LOC_Os05g47890	1.2103	1.92e-24	6.5e-20	yes	up	118.03	291.157	116.87	121.11	116.11	299.75	281.9	291.82		RecName: Full=Guanine nucleotide-binding protein subunit beta-like protein B; Short=GPB-LR; AltName: Full=Receptor for activated C kinase 1B
LOC_Os03g52880	1.45753	1.95e-24	6.6e-20	yes	up	6.32667	18.45	6.29	6.06	6.63	17.27	18.89	19.19		RecName: Full=Root phototropism protein 3; AltName: Full=BTB/POZ domain-containing protein RPT3; AltName: Full=Non-phototropic hypocotyl protein 3
LOC_Os01g03730	2.49613	2.06e-24	6.97e-20	yes	up	18.6367	113.113	25.81	16.51	13.59	115.41	114.01	109.92		RecName: Full=Endonuclease 4; Short=AtENDO4; AltName: Full=Deoxyribonuclease ENDO4; AltName: Full=Single-stranded-nucleate endonuclease ENDO4; Flags: Precursor
LOC_Os09g06560	2.15196	2.25e-24	7.59e-20	yes	up	4.9	23.3067	4.04	6.34	4.32	21.38	20.67	27.87		RecName: Full=WD repeat and HMG-box DNA-binding protein 1; AltName: Full=Acidic nucleoplasmic DNA-binding protein 1; Short=And-1
LOC_Os04g57730	2.24502	2.39e-24	8.07e-20	yes	up	4.51	22.43	3.16	5.07	5.3	21.13	20.08	26.08		RecName: Full=Uracil-DNA glycosylase; Short=UDG
LOC_Os01g65169	2.91894	2.61e-24	8.82e-20	yes	up	1.47	11.8	1.08	2.17	1.16	11.28	13.81	10.31		RecName: Full=Protein NRT1/ PTR FAMILY 5.10; Short=AtNPF5.10
LOC_Os04g49860	2.25953	2.67e-24	9.05e-20	yes	up	1.92667	9.81	1.49	2.61	1.68	9.16	9.75	10.52		RecName: Full=DNA replication ATP-dependent helicase/nuclease DNA2; AltName: Full=DNA replication ATP-dependent helicase-like homolog; Includes: RecName: Full=DNA
LOC_Os02g51890	1.94981	3.76e-24	1.27e-19	yes	up	4.42	18.1733	5.21	4.08	3.97	15.67	18.54	20.31		RecName: Full=RNA-binding protein 24; AltName: Full=RNA-binding motif protein 24; AltName: Full=RNA-binding protein SEB-4
LOC_Os06g29700	2.37337	4.71e-24	1.59e-19	yes	up	1.09667	5.65667	1.04	1.13	1.12	5.57	5.16	6.24		RecName: Full=F-box/FBD/LRR-repeat protein At5g22700
LOC_Os03g39740	1.54021	5.37e-24	1.82e-19	yes	up	7.11667	21.91	7.26	7.46	6.63	20.87	20.74	24.12		_
LOC_Os07g39530	5.37542	6.07e-24	2.05e-19	yes	up	0.0933333	4.10667	0.15	0.03	0.1	2.85	2.8	6.67		RecName: Full=BTB/POZ domain-containing protein At5g48130
LOC_Os05g48890	2.90721	6.87e-24	2.32e-19	yes	up	1.27333	10.1933	1.21	1.19	1.42	10.09	10.44	10.05		RecName: Full=Fasciclin-like arabinogalactan protein 9; Flags: Precursor
LOC_Os12g37580	2.44605	7.24e-24	2.45e-19	yes	up	0.493333	2.82	0.36	0.54	0.58	2.97	2.64	2.85		RecName: Full=ABC transporter C family member 10; Short=ABC transporter ABCC.10; Short=AtABCC10; AltName: Full=ATP-energized glutathione S-conjugate pump 14; AltN
LOC_Os01g71690	1.80819	7.43e-24	2.51e-19	yes	up	1.65	6.13667	1.68	1.56	1.71	6.32	6.08	6.01		RecName: Full=DNA repair protein recA homolog 2, mitochondrial; AltName: Full=Recombinase A homolog 2; Flags: Precursor
LOC_Os01g71820	6.56055	7.46e-24	2.52e-19	yes	up	0.123333	19.1033	0.16	0.08	0.13	16.29	17.02	24		RecName: Full=Glucan endo-1,3-beta-glucosidase GV; AltName: Full=(1-)3)-beta-glucan endohydrolase GV; AltName: Full=(1-)3)-beta-glucanase isoenzyme GV; AltName: Full
LOC_Os03g58810	1.23944	9.1e-24	3.08e-19	yes	up	22.0633	54.4967	21.65	22.97	21.57	54.81	52.11	56.57		RecName: Full=DEAD-box ATP-dependent RNA helicase 27
LOC_Os02g02850	1.45049	9.6e-24	3.25e-19	yes	up	11.67	33.9133	10.62	12.86	11.53	34.36	33.43	33.95		RecName: Full=Bifunctional protein FolD 4, chloroplastic; AltName: Full=Protein EMBRYO DEFECTIVE 3127; AltName: Full=Tetrahydrofolate dehydrogenase/cyclohydrolase
LOC_Os01g39136	5.822	1.01e-23	3.4e-19	yes	up	0.0533333	4.17	0.06	0.03	0.07	2.69	3.63	6.19		_
LOC_Os01g52390	1.17901	1.13e-23	3.81e-19	yes	up	105.94	255.717	107.75	105.64	104.43	253.6	251.22	262.33		_
LOC_Os04g54430	1.3059	1.52e-23	5.14e-19	yes	up	145.61	385.283	134.83	155.01	146.99	408.5	385.02	362.33		RecName: Full=Phosphopantothenoylcysteine decarboxylase subunit VHS3; AltName: Full=Viable in a HAL3 SIT4 background protein 3
LOC_Os04g30160	5.44005	2.08e-23	7.04e-19	yes	up	0.0533333	2.48667	0.08	0.06	0.02	2.27	2.76	2.43		RecName: Full=Wall-associated receptor kinase-like 10; Flags: Precursor
LOC_Os02g37870	1.47972	2.12e-23	7.17e-19	yes	up	27.1133	80.5	24.84	30.12	26.38	84.36	82.63	74.51		RecName: Full=Ribosome biogenesis protein BRX1
LOC_Os11g29380	2.37311	2.34e-23	7.92e-19	yes	up	24.0333	133.01	26.29	29.66	16.15	123.31	119.3	156.42		RecName: Full=DNA replication licensing factor MCM2; AltName: Full=Minichromosome maintenance protein 2; Short=OsMCM2
LOC_Os03g22320	1.53299	2.67e-23	9.04e-19	yes	up	10.16	32.0167	9.81	11.47	9.2	34.87	31.55	29.63		RecName: Full=U3 small nucleolar RNA-associated protein 14; Short=U3 snoRNA-associated protein 14; AltName: Full=U three protein 14
LOC_Os01g41240	2.9993	2.71e-23	9.17e-19	yes	up	2.08667	17.8533	2.87	1.33	2.06	19.33	19.49	14.74		RecName: Full=Probable strigolactone esterase D14; AltName: Full=Protein DWARF-14; AltName: Full=Protein DWARF-88; AltName: Full=Protein HIGH-TILLERING DWARF 2
LOC_Os05g10930	2.18319	2.83e-23	9.57e-19	yes	up	17.91	87.5833	13.35	18.81	21.57	72.47	84.21	106.07		RecName: Full=Glutaredoxin-C7
LOC_Os02g46990	1.30238	2.88e-23	9.74e-19	yes	up	16.26	42.59	15.97	16.67	16.14	44.09	42.87	40.81		RecName: Full=ATPase family AAA domain-containing protein 3
LOC_Os02g21660	1.22029	2.96e-23	9.99e-19	yes	up	119.023	296.54	111.1	117.4	128.57	304.43	282.33	302.86		RecName: Full=60S ribosomal protein L10a-1
LOC_Os03g11420	2.93443	3.49e-23	1.18e-18	yes	up	8.05	65.62	9.39	8.92	5.84	78.15	79.43	39.28		RecName: Full=Beta-glucosidase 6; Short=Os3bglu6; Flags: Precursor
LOC_Os10g35290	1.24381	3.62e-23	1.22e-18	yes	up	14.2067	35.2067	12.91	15.15	14.56	34.21	34.33	37.08		RecName: Full=Probable DNA-directed RNA polymerase I subunit RPA2; AltName: Full=DNA-directed RNA polymerase I polypeptide 2; Short=RNA polymerase I subunit 2
LOC_Os11g47770	2.38891	3.63e-23	1.23e-18	yes	up	6.95	39.0167	4.95	9.2	6.7	38.18	35.45	43.42		_
LOC_Os04g48130	2.1667	3.93e-23	1.33e-18	yes	up	2.69333	12.94	2.82	2.4	2.86	12.86	14.33	11.63		RecName: Full=Inactive rhomboid protein 1; Short=iRhom1; AltName: Full=Rhomboid family member 1
LOC_Os02g10500	3.27464	4.19e-23	1.42e-18	yes	up	1.94333	20.1533	2	1.64	2.19	21.57	22.3	16.59		_
LOC_Os03g46640	2.08305	6.49e-23	2.19e-18	yes	up	50.68	229.537	39.46	58.16	54.42	197.55	193.76	297.3		RecName: Full=Deoxyuridine 5'-triphosphate nucleotidohydrolase; Short=dUTPase; AltName: Full=dUTP pyrophosphatase
LOC_Os12g01370	2.64503	6.87e-23	2.32e-18	yes	up	2.96667	19.7667	3.76	2.69	2.45	22.24	22.62	14.44		RecName: Full=Omega-3 fatty acid desaturase, chloroplastic; Flags: Precursor
LOC_Os02g37862	1.1297	7.48e-23	2.53e-18	yes	up	287.38	671.963	275.23	298.44	288.47	690.09	650.1	675.7		RecName: Full=60S ribosomal protein L6-3
LOC_Os04g19114	5.14591	7.69e-23	2.6e-18	yes	up	0.0633333	2.19333	0.05	0.09	0.05	1.74	1.48	3.36		RecName: Full=Retrovirus-related Pol polyprotein from transposon 17.6; Includes: RecName: Full=Protease; Includes: RecName: Full=Reverse transcriptase; Includes: RecN
LOC_Os03g22730	1.23621	1.03e-22	3.47e-18	yes	up	63.1633	158.04	60.06	66.56	62.87	165.85	159.46	148.81		RecName: Full=Probable nucleolar protein 5-2; AltName: Full=MAR-binding NOP56/58 homolog 2; AltName: Full=Nucleolar protein 58-2
LOC_Os04g40050	2.18338	1.08e-22	3.66e-18	yes	up	6.87333	32.4633	4.89	9.05	6.68	33.09	29.66	34.64		_
LOC_Os07g44190	1.3619	1.17e-22	3.97e-18	yes	up	50.22	137.183	46.55	56.75	47.36	140.73	129.58	141.24		RecName: Full=H/ACA ribonucleoprotein complex subunit 4; AltName: Full=CBF5 homolog; AltName: Full=Dyskerin; AltName: Full=Nopp-140-associated protein of 57 kDa hom
LOC_Os07g44640	1.37989	1.23e-22	4.16e-18	yes	up	10.2267	28.2367	9.32	11.25	10.11	27.71	28.92	28.08		RecName: Full=Probable protein arginine N-methyltransferase 3
LOC_Os03g22880	1.25659	1.24e-22	4.18e-18	yes	up	94.0167	238.923	89.34	103.47	89.24	244.14	232.28	240.35		RecName: Full=Nucleolar protein 56; AltName: Full=Nucleolar protein 5A
LOC_Os03g55200	2.10963	1.58e-22	5.33e-18	yes	up	1.95333	8.99	1.79	2.21	1.86	8.08	8.33	10.56		_
LOC_Os02g53400	3.14598	1.6e-22	5.4e-18	yes	up	1.30667	17.9667	1.93	0.9	1.09	21.87	21.18	10.85		RecName: Full=Thioredoxin-like 3-1, chloroplastic
LOC_Os03g24730	2.06424	1.67e-22	5.63e-18	yes	up	1.60333	7.17	1.85	1.52	1.44	6.54	6.7	8.27		_
LOC_Os07g40930	1.50547	1.69e-22	5.71e-18	yes	up	16.7733	50.6967	15.53	18.69	16.1	51.63	53.9	46.56		RecName: Full=Ribosome biogenesis protein WDR12 homolog, partial
LOC_Os03g46090	1.78473	2.64e-22	8.94e-18	yes	up	8.77333	32.0867	8.8	9.01	8.51	35.61	35.06	25.59		RecName: Full=Type I inositol 1,4,5-trisphosphate 5-phosphatase CVP2; AltName: Full=Protein COTYLEDON VASCULAR PATTERN 2
LOC_Os11g38480	2.88794	3.27e-22	1.1e-17	yes	up	2.01	9.75	1.91	1.94	2.18	7.4	8.35	13.5		_
LOC_Os07g08330	1.14936	3.45e-22	1.17e-17	yes	up	250.47	591.217	249.75	260.43	241.23	601.49	572.7	599.46		RecName: Full=60S ribosomal protein L4-1; Short=L1
LOC_Os11g03990	1.79655	3.99e-22	1.35e-17	yes	up	12.07	44.8367	13.84	11.2	11.17	39.84	41.92	52.75		RecName: Full=Glutamate-rich WD repeat-containing protein 1
LOC_Os08g04230	6.04955	4.03e-22	1.36e-17	yes	up	0.07	4.80333	0.03	0.08	0.1	5.68	4.56	4.17		RecName: Full=Cysteine-rich repeat secretory protein 55; Flags: Precursor
LOC_Os03g11510	11.6304	4.34e-22	1.47e-17	yes	up	0	17.02	0	0	0	19.53	18.44	13.09		RecName: Full=Mitochondrial substrate carrier family protein U
LOC_Os12g38750	3.26476	4.39e-22	1.49e-17	yes	up	0.4	4.17333	0.45	0.45	0.3	5.03	4.14	3.35		RecName: Full=Probable inactive purple acid phosphatase 1; Flags: Precursor
LOC_Os01g60280	2.23271	4.79e-22	1.62e-17	yes	up	1.23667	6.19	1.35	0.97	1.39	5.19	6.04	7.34		RecName: Full=Probable LRR receptor-like serine/threonine-protein kinase At1g06840; Flags: Precursor
LOC_Os08g39810	5.40843	4.82e-22	1.63e-17	yes	up	0.176667	8.3	0.18	0.17	0.18	4.33	4.59	15.98		RecName: Full=Lysine-specific demethylase 8; AltName: Full=JmjC domain-containing protein 5; AltName: Full=Jumonji domain-containing protein 5
LOC_Os01g11550	1.73357	5.12e-22	1.73e-17	yes	up	25.0933	88.75	28.14	21.53	25.61	96.43	93.12	76.7		RecName: Full=Transcription factor PCF5
LOC_Os06g43930	3.35715	6.44e-22	2.18e-17	yes	up	0.333333	3.64667	0.38	0.35	0.27	3.29	4.44	3.21		RecName: Full=Lysosomal Pro-X carboxypeptidase; AltName: Full=Proline carboxypeptidase; AltName: Full=Prolylcarboxypeptidase; Short=PRCP; Flags: Precursor
LOC_Os12g32470	1.97845	7.38e-22	2.5e-17	yes	up	3.70333	15.6467	2.91	4.1	4.1	16.54	16.6	13.8		_
LOC_Os02g42310	2.02213	7.58e-22	2.57e-17	yes	up	2.53333	10.3567	2.39	2.78	2.43	9.45	9.56	12.06		RecName: Full=Serine carboxypeptidase-like 35; Flags: Precursor
LOC_Os10g34840	2.83083	8.53e-22	2.88e-17	yes	up	3.49667	26.5967	3.9	3.1	3.49	25.99	35.1	18.7		RecName: Full=Ripening-related protein 3; Flags: Precursor
LOC_Os02g15820	2.4486	9.26e-22	3.13e-17	yes	up	1.50667	8.81	1.77	1.79	0.96	8.6	8.87	8.96		_
LOC_Os02g57590	1.20301	9.5e-22	3.21e-17	yes	up	81.4533	199.37	74.36	84.16	85.84	190.98	212.36	194.77		RecName: Full=Probable mediator of RNA polymerase II transcription subunit 36b; AltName: Full=Histone-glutamine methyltransferase; AltName: Full=SKP1-interacting p
LOC_Os11g36960	1.64411	9.73e-22	3.29e-17	yes	up	14.35	46.9367	14.59	16.14	12.32	46.17	42.59	52.05		_
LOC_Os09g24220	2.01407	1.06e-21	3.6e-17	yes	up	3.37	14.46	2.93	4.33	2.85	13.03	13.36	16.99		RecName: Full=DNA mismatch repair protein MSH6; Short=AtMSH6; AltName: Full=MutS protein homolog 6
LOC_Os01g10690	2.29365	1.1e-21	3.73e-17	yes	up	4.71	24.56	3.86	6.01	4.26	20.81	20.8	32.07		_
LOC_Os01g56940	2.1367	1.11e-21	3.76e-17	yes	up	2.1	9.74	1.91	2.71	1.68	10.27	8.48	10.47		RecName: Full=Exonuclease 1; AltName: Full=OsEXO-1
LOC_Os11g43760	2.52165	1.17e-21	3.96e-17	yes	up	0.646667	4.12333	0.68	0.55	0.71	4.09	4.48	3.8		RecName: Full=Sn1-specific diacylglycerol lipase alpha; Short=DGL-alpha; AltName: Full=Neural stem cell-derived dendrite regulator
LOC_Os08g01680	1.95309	1.23e-21	4.17e-17	yes	up	7.36	29.5667	6.38	8.91	6.79	26.61	27.92	34.17		RecName: Full=Chromatin assembly factor 1 subunit FAS2 homolog; Short=CAF-1 subunit FAS2 homolog; AltName: Full=CAF-1 p60 homolog; AltName: Full=Protein FASCIATA 2
LOC_Os03g58720	1.51331	1.43e-21	4.84e-17	yes	up	6.61333	20.0167	5.59	7.67	6.58	19.43	19.5	21.12		RecName: Full=RNA-binding protein 28; AltName: Full=RNA-binding motif protein 28
LOC_Os03g08410	8.24693	1.53e-21	5.18e-17	yes	up	0.0333333	8.70333	0.06	0.02	0.02	11.82	11.64	2.65		RecName: Full=Probable flavin-containing monooxygenase 1
LOC_Os01g65830	1.42206	1.56e-21	5.29e-17	yes	up	10.0933	28.7533	9.17	10.02	11.09	28.99	28.16	29.11		RecName: Full=Acyl-
LOC_Os02g48630	2.37352	1.72e-21	5.82e-17	yes	up	16.7333	91.98	15.77	18.23	16.2	110.81	107.11	58.02		_
LOC_Os06g30320	1.31752	1.81e-21	6.11e-17	yes	up	9.79333	25.9533	9.85	10.11	9.42	26.76	24.37	26.73		RecName: Full=Nucleolar complex-associated protein 3
LOC_Os05g02810	2.78259	1.87e-21	6.34e-17	yes	up	1.76667	12.9133	1.29	2.05	1.96	10.04	10.99	17.71		_
LOC_Os03g19000	4.00454	1.9e-21	6.44e-17	yes	up	0.403333	6.91	0.58	0.18	0.45	7.16	6.65	6.92		RecName: Full=Peroxisomal membrane protein 11-2; AltName: Full=OsPEX11-2; AltName: Full=OsPEX11-5; AltName: Full=Peroxin-11-2
LOC_Os05g30570	4.79994	2.03e-21	6.87e-17	yes	up	0.146667	4.46	0.09	0.21	0.14	5.29	3.6	4.49		_
LOC_Os09g39780	1.65736	2.3e-21	7.78e-17	yes	up	41.2833	139.387	34.22	42.51	47.12	153.91	124.04	140.21		RecName: Full=Peptidyl-prolyl cis-trans isomerase CYP19-3; Short=PPIase CYP19-3; AltName: Full=Cyclophilin of 19 kDa 3; AltName: Full=Cyclophilin-4; AltName: Full=
LOC_Os12g43600	1.22868	2.36e-21	8e-17	yes	up	2398.21	6016.95	2165.25	2338.88	2690.51	6111.48	5686.04	6253.32		RecName: Full=Glycine-rich RNA-binding protein 2
LOC_Os01g70110	2.51458	2.43e-21	8.23e-17	yes	up	16.76	103.437	22.24	10.29	17.75	89.94	105.15	115.22		RecName: Full=NAC domain-containing protein 68; Short=ONAC068
LOC_Os05g32760	1.42464	2.69e-21	9.09e-17	yes	up	13.48	38.3433	11.29	14.88	14.27	38.18	35.78	41.07		RecName: Full=Actin cytoskeleton-regulatory complex protein PAN1
LOC_Os01g10580	2.30887	2.76e-21	9.33e-17	yes	up	1.62	8.28667	1.36	1.89	1.61	8.71	8.81	7.34		RecName: Full=Probable salt tolerance-like protein At1g78600
LOC_Os02g19850	2.0486	2.85e-21	9.63e-17	yes	up	1.25667	6.63333	1.29	1.31	1.17	6.1	6.45	7.35		_
LOC_Os03g58800	1.9086	3.2e-21	1.08e-16	yes	up	4.00333	16.0533	4.8	3.44	3.77	14.95	16.77	16.44		RecName: Full=Mitochondrial chaperone BCS1; Short=h-BCS1; AltName: Full=BCS1-like protein
LOC_Os04g36890	1.20656	3.44e-21	1.16e-16	yes	up	34.93	85.9367	34.74	36.62	33.43	88.41	83.39	86.01		RecName: Full=Peptidyl-prolyl cis-trans isomerase FKBP53; Short=PPIase FKBP53; AltName: Full=FK506-binding protein 53; Short=AtFKBP53; AltName: Full=Immunophilin F
LOC_Os02g11760	2.18059	3.45e-21	1.17e-16	yes	up	15.2267	21.59	9.26	26.37	10.05	21.67	22.93	20.17		RecName: Full=Putative pleiotropic drug resistance protein 7
LOC_Os12g41390	1.39386	3.76e-21	1.27e-16	yes	up	136.613	382.797	146.25	125.28	138.31	370.05	421.45	356.89		RecName: Full=Homocysteine S-methyltransferase 3; AltName: Full=S-methylmethionine:homocysteine methyltransferase 3; Short=SMM:Hcy S-methyltransferase 3; AltName: F
LOC_Os04g40970	2.2888	3.94e-21	1.33e-16	yes	up	1.65	8.56	1.3	2.28	1.37	7.49	8.61	9.58		RecName: Full=ATP-dependent DNA helicase Q-like 5; AltName: Full=RecQ-like protein 5; Short=AtRecQ5; Short=AtRecQl5
LOC_Os08g40930	1.83419	4.14e-21	1.4e-16	yes	up	3.82333	13.8567	2.99	4	4.48	15.02	15.08	11.47		RecName: Full=Isoamylase 1, chloroplastic; Short=AtISA1; Flags: Precursor
LOC_Os09g29710	7.5504	4.23e-21	1.43e-16	yes	up	0.0966667	19.7967	0.22	0.07	0	11.73	21.79	25.87		RecName: Full=EG45-like domain containing protein; AltName: Full=Blight-associated protein p12; AltName: Full=Plant natriuretic peptide; Short=PNP; Flags: Precursor
LOC_Os01g71270	2.61263	4.59e-21	1.55e-16	yes	up	1.58	10.35	2.18	1.31	1.25	11.71	10.32	9.02		RecName: Full=Eukaryotic peptide chain release factor subunit 1-3; Short=Eukaryotic release factor 1-3; Short=eRF1-3; AltName: Full=Omnipotent suppressor protein 1 h
LOC_Os11g40590	1.71026	4.74e-21	1.6e-16	yes	up	10.24	35.5	10.37	10.13	10.22	37.79	40.42	28.29		RecName: Full=Loricrin
LOC_Os04g52530	1.87079	5.66e-21	1.91e-16	yes	up	10.21	39.8667	11.84	8.85	9.94	34.03	44.52	41.05		_
LOC_Os03g58350	2.16155	5.67e-21	1.92e-16	yes	up	6.98667	29.8733	8.23	7.44	5.29	25.69	34.72	29.21		RecName: Full=Auxin-responsive protein IAA14; AltName: Full=Indoleacetic acid-induced protein 14
LOC_Os04g12480	1.74282	6.6e-21	2.23e-16	yes	up	4.70333	16.7233	3.88	5.78	4.45	16.11	15.62	18.44		RecName: Full=Pumilio homolog 2; Short=APUM-2; Short=AtPUM2
LOC_Os05g43830	1.34318	7.35e-21	2.49e-16	yes	up	13.8367	37.3767	14.21	13.56	13.74	38.29	38.57	35.27		RecName: Full=Proline iminopeptidase; Short=PIP; AltName: Full=Prolyl aminopeptidase; Short=PAP
LOC_Os05g39960	1.20289	7.55e-21	2.55e-16	yes	up	405.023	980.81	384.4	408.03	422.64	1021.98	873.33	1047.12		RecName: Full=40S ribosomal protein S26; AltName: Full=S31
LOC_Os01g60790	1.13812	8.46e-21	2.86e-16	yes	up	195.097	459.767	184.93	192.1	208.26	475.93	449.28	454.09		RecName: Full=40S ribosomal protein S26; AltName: Full=S31
LOC_Os05g11710	1.06174	8.74e-21	2.96e-16	yes	up	155.64	347.267	148.64	154.18	164.1	340.24	339.33	362.23		RecName: Full=60S ribosomal protein L11
LOC_Os05g47540	1.90837	8.77e-21	2.96e-16	yes	up	43.7833	174.313	44.25	43.8	43.3	200.99	195.06	126.89		RecName: Full=Phosphomethylethanolamine N-methyltransferase; Short=AtPMEAMT; AltName: Full=Phosphoethanolamine N-methyltransferase 2
LOC_Os11g04830	4.0371	8.98e-21	3.04e-16	yes	up	0.343333	6	0.38	0.38	0.27	5.99	9.36	2.65		_
LOC_Os02g40500	3.00821	1.27e-20	4.29e-16	yes	up	3.26667	31.5333	4.71	2.45	2.64	31.09	37.23	26.28		RecName: Full=Glutaredoxin-C4, chloroplastic; AltName: Full=Glutaredoxin-C2 homolog 2; Flags: Precursor
LOC_Os07g07709	1.15387	1.28e-20	4.32e-16	yes	up	200.517	478.573	205.84	190.49	205.22	480.02	482.75	472.95		RecName: Full=40S ribosomal protein S18
LOC_Os12g37519	3.47786	1.31e-20	4.45e-16	yes	up	1.94	22.8867	3.44	1.23	1.15	27.92	21.91	18.83		_
LOC_Os08g41780	2.99152	1.41e-20	4.78e-16	yes	up	2.18	18.7533	3.43	1.5	1.61	15.26	20.05	20.95		RecName: Full=Triacylglycerol lipase 2; Flags: Precursor
LOC_Os05g49620	3.72272	1.41e-20	4.78e-16	yes	up	1.33	18.7867	0.91	1.35	1.73	16.83	28.92	10.61		RecName: Full=Probable WRKY transcription factor 41; AltName: Full=WRKY DNA-binding protein 41
LOC_Os12g10670	1.78672	1.47e-20	4.96e-16	yes	up	2.36667	8.65667	2.11	2.9	2.09	8.84	9.2	7.93		RecName: Full=Protein STICHEL
LOC_Os03g52284	3.53987	1.65e-20	5.58e-16	yes	up	0.473333	5.97333	0.82	0.34	0.26	5.24	6	6.68		_
LOC_Os11g47320	1.64451	2e-20	6.75e-16	yes	up	6.30667	20.8633	5.5	7.72	5.7	20.39	19.27	22.93		RecName: Full=Protein dopey homolog PFC0245c
LOC_Os07g04150	1.43324	2.01e-20	6.8e-16	yes	up	24.84	71.3967	24.32	22.11	28.09	64.98	69.33	79.88		_
LOC_Os03g27260	1.04663	2.16e-20	7.32e-16	yes	up	202.367	446.55	195.83	202.46	208.81	448.14	426.84	464.67		RecName: Full=40S ribosomal protein S6
LOC_Os02g35940	2.18057	2.26e-20	7.64e-16	yes	up	2.20667	10.63	2.19	1.87	2.56	11.11	10.48	10.3		RecName: Full=Tuliposide A-converting enzyme 2, chloroplastic; Short=TgTCEA2; Flags: Precursor
LOC_Os08g38160	2.14557	2.36e-20	7.98e-16	yes	up	4.71333	23.9533	3.72	5.98	4.44	26.06	22.51	23.29		RecName: Full=UDP-glycosyltransferase 89A2
LOC_Os11g11390	1.13074	2.68e-20	9.07e-16	yes	up	152.66	357.603	155.18	149.4	153.4	335.12	376.66	361.03		RecName: Full=60S ribosomal protein L10-1; AltName: Full=Protein QM; AltName: Full=Putative tumor suppressor SC34
LOC_Os07g01860	1.57035	2.81e-20	9.51e-16	yes	up	5.67	17.8333	4.57	6.67	5.77	18.26	16.55	18.69		RecName: Full=Protein LONGIFOLIA 1; AltName: Full=Protein TON1 RECRUITING MOTIF 2
LOC_Os12g06910	1.4006	3.01e-20	1.02e-15	yes	up	10.44	29.2	9.54	11.45	10.33	31.98	29.21	26.41		RecName: Full=Nucleolar protein 6; AltName: Full=Nucleolar RNA-associated protein; Short=Nrap
LOC_Os07g32350	1.38396	3.18e-20	1.08e-15	yes	up	13.8967	39.4567	14.13	13.81	13.75	42.41	38.67	37.29		_
LOC_Os11g05370	1.23607	3.29e-20	1.11e-15	yes	up	210.59	540.22	213.36	207.27	211.14	530.14	482.59	607.93		RecName: Full=60S ribosomal protein L26-1
LOC_Os07g31500	2.35385	3.47e-20	1.17e-15	yes	up	16.1967	95.6933	23.41	15.13	10.05	117.66	94.35	75.07		RecName: Full=LRR receptor-like serine/threonine-protein kinase GSO1; AltName: Full=Protein GASSHO 1; Flags: Precursor
LOC_Os03g08580	3.10196	3.77e-20	1.27e-15	yes	up	3.65	33.16	4.93	3.5	2.52	37.16	43.3	19.02		_
LOC_Os01g12440	2.67651	4.56e-20	1.54e-15	yes	up	1.15333	7.83333	0.71	1.59	1.16	7.46	8.75	7.29		RecName: Full=Ethylene-responsive transcription factor CRF2; AltName: Full=Protein CYTOKININ RESPONSE FACTOR 2
LOC_Os02g44130	1.83097	5.13e-20	1.74e-15	yes	up	4.13	15.6533	4.09	3.79	4.51	16.25	13.45	17.26		RecName: Full=Zinc finger protein ZAT2; AltName: Full=Protein DUO1-ACTIVATED ZINC FINGER 1
LOC_Os01g03740	3.10361	5.28e-20	1.79e-15	yes	up	0.246667	2.25	0.29	0.27	0.18	1.92	2.31	2.52		RecName: Full=Endonuclease 2; Short=AtENDO2; AltName: Full=Deoxyribonuclease ENDO2; AltName: Full=Single-stranded-nucleate endonuclease ENDO2; Flags: Precursor
LOC_Os09g20240	2.06206	6.28e-20	2.12e-15	yes	up	2.54667	11.3167	2.2	2.7	2.74	10.79	12.37	10.79		_
LOC_Os03g60509	1.84854	6.41e-20	2.17e-15	yes	up	71.7333	276.377	68.32	55.41	91.47	269.61	305.03	254.49		RecName: Full=Chalcone--flavonone isomerase; Short=Chalcone isomerase
LOC_Os06g21480	1.34867	6.47e-20	2.19e-15	yes	up	58.7	160.15	51.64	56.68	67.78	151.42	161.44	167.59		RecName: Full=60S ribosomal protein L31
LOC_Os03g02740	2.17514	6.79e-20	2.3e-15	yes	up	5.71333	27.2233	3.76	7.66	5.72	29.07	28.63	23.97		RecName: Full=Phospholipase D beta 1; Short=AtPLDbeta1; Short=PLD beta 1; Short=PLDbeta
LOC_Os06g43620	1.70299	6.82e-20	2.31e-15	yes	up	4.37333	15.1333	4.56	4.93	3.63	13.99	14.24	17.17		RecName: Full=Adiponectin receptor protein
LOC_Os05g27940	1.0589	7.4e-20	2.5e-15	yes	up	131.573	292.733	128.65	132.79	133.28	283.74	305.39	289.07		RecName: Full=40S ribosomal protein S7
LOC_Os02g40460	1.41382	7.74e-20	2.62e-15	yes	up	14.36	38.0367	10.71	15.31	17.06	39.94	38.97	35.2		RecName: Full=Polyribonucleotide nucleotidyltransferase 2, mitochondrial; AltName: Full=Polynucleotide phosphorylase 2; Short=PNPase 2; Flags: Precursor
LOC_Os03g54130	3.87931	7.81e-20	2.64e-15	yes	up	0.32	5.02333	0.43	0.15	0.38	4.19	4.5	6.38		RecName: Full=Cysteine protease 1; AltName: Full=OsCP1; Flags: Precursor
LOC_Os11g47130	1.86842	8.2e-20	2.77e-15	yes	up	4.70333	18.2567	4.37	5.96	3.78	17.54	16.55	20.68		RecName: Full=Nuclear polyadenylated RNA-binding protein 3
LOC_Os03g01008	2.31799	8.82e-20	2.98e-15	yes	up	1.74	9.30667	1.84	1.73	1.65	8.6	7.35	11.97		_
LOC_Os09g29630	1.183	9.16e-20	3.1e-15	yes	up	15.3433	37.1	14.73	16.43	14.87	38.27	35.66	37.37		RecName: Full=tRNA (cytosine(34)-C(5))-methyltransferase; AltName: Full=Myc-induced SUN domain-containing protein; Short=Misu; AltName: Full=NOL1/NOP2/Sun domain
LOC_Os03g63400	1.11147	9.18e-20	3.11e-15	yes	up	87.14	201.303	81.73	87.86	91.83	206.54	196.69	200.68		RecName: Full=Transcription factor BTF3; AltName: Full=Nascent polypeptide-associated complex subunit beta; Short=NAC-beta; AltName: Full=RNA polymerase B transcripti
LOC_Os09g21420	3.33578	9.72e-20	3.29e-15	yes	up	0.306667	3.28333	0.14	0.5	0.28	3.52	3.15	3.18		RecName: Full=Zinc finger BED domain-containing protein RICESLEEPER 2; AltName: Full=Transposase-like protein RICESLEEPER 2
LOC_Os06g41030	1.16776	1.03e-19	3.48e-15	yes	up	120.297	286.163	115.3	131.94	113.65	293.96	250.65	313.88		_
LOC_Os08g15030	1.46164	1.17e-19	3.95e-15	yes	up	12.82	37.66	11.92	14.73	11.81	37.13	35.85	40		RecName: Full=Aspartate carbamoyltransferase, chloroplastic; AltName: Full=Aspartate transcarbamylase; Short=ATCase; Flags: Precursor
LOC_Os08g13690	1.06219	1.17e-19	3.95e-15	yes	up	236.657	527.34	234.2	244.54	231.23	516.13	547.18	518.71		RecName: Full=60S ribosomal protein L7-3
LOC_Os01g68440	1.87772	1.19e-19	4.02e-15	yes	up	3.00667	10.6367	2.41	2.93	3.68	11.91	9.12	10.88		RecName: Full=snRNA-activating protein complex subunit; Short=SNAPc subunit; AltName: Full=Protein SHOOT REDIFFERENTIATION DEFECTIVE 2
LOC_Os04g43300	2.24361	1.21e-19	4.1e-15	yes	up	6.87	34.6067	5.48	8.8	6.33	29.78	27.31	46.73		RecName: Full=Protein BREAST CANCER SUSCEPTIBILITY 1 homolog; Short=AtBRCA1
LOC_Os03g29240	1.63446	1.3e-19	4.41e-15	yes	up	28.0533	92.32	32.39	28.85	22.92	84.29	98.37	94.3		RecName: Full=Probable nucleoredoxin 1-2; Short=OsNrx1-2
LOC_Os11g32110	1.53942	1.33e-19	4.5e-15	yes	up	42.8967	132.67	45.61	47.29	35.79	138.05	138.42	121.54		RecName: Full=Auxin response factor 23; AltName: Full=OsARF1
LOC_Os08g18150	2.1808	1.51e-19	5.11e-15	yes	up	5.95333	28.6933	4.73	6.78	6.35	25.55	22.1	38.43		RecName: Full=WD repeat-containing protein 76
LOC_Os03g09910	2.46041	1.99e-19	6.71e-15	yes	up	12.6833	72.7067	10.11	11.83	16.11	80.7	91.43	45.99		RecName: Full=Aminotransferase ALD1 homolog
LOC_Os01g73160	1.30628	2.04e-19	6.91e-15	yes	up	83.2933	224.453	82.94	88.79	78.15	210.15	209.39	253.82		RecName: Full=40S ribosomal protein S10
LOC_Os08g34800	3.24841	2.07e-19	6.99e-15	yes	up	1.24	12.62	1.04	1.39	1.29	9.27	17.79	10.8		_
LOC_Os03g04590	1.03363	2.09e-19	7.05e-15	yes	up	396.683	872.337	387.46	386.32	416.27	822.72	891.66	902.63		RecName: Full=60S ribosomal protein L23; AltName: Full=Protein EMBRYO DEFECTIVE 2171
LOC_Os10g01540	1.52136	2.14e-19	7.25e-15	yes	up	6.68667	20.3833	6.73	7.19	6.14	21.45	20.9	18.8		RecName: Full=Notchless protein homolog
LOC_Os08g26820	1.7613	2.25e-19	7.6e-15	yes	up	2.81667	10.17	2.9	2.6	2.95	8.63	10.28	11.6		_
LOC_Os08g17784	1.48733	2.46e-19	8.33e-15	yes	up	4.25667	12.59	4.51	3.88	4.38	11.69	12.59	13.49		RecName: Full=Purple acid phosphatase 15; AltName: Full=Phytase; Flags: Precursor
LOC_Os10g35940	1.44391	2.9e-19	9.8e-15	yes	up	6.60667	19.1	6.78	5.91	7.13	17.65	20	19.65		RecName: Full=Folylpolyglutamate synthase; AltName: Full=DHFS-FPGS homolog B; AltName: Full=Folylpoly-gamma-glutamate synthetase; Short=FPGS; AltName: Full=Tetrah
LOC_Os12g22030	1.32839	2.91e-19	9.84e-15	yes	up	26.3367	70.5267	27.8	27.12	24.09	71.77	65.04	74.77		RecName: Full=Serine hydroxymethyltransferase 4; Short=AtSHMT4; AltName: Full=Glycine hydroxymethyltransferase 4; AltName: Full=Serine methylase 4
LOC_Os03g50220	1.95576	3.19e-19	1.08e-14	yes	up	4.36667	18.0333	3.4	5.62	4.08	16.43	17.22	20.45		RecName: Full=Homologous-pairing protein 2 homolog; AltName: Full=Protein AHP2; Short=AtAHP2; AltName: Full=Protein ARABIDOPSIS HOMOLOG PAIRING 2; AltName: Full=Pro
LOC_Os03g01530	1.48503	3.21e-19	1.08e-14	yes	up	120.823	359.58	123.44	136.34	102.69	392.46	346.25	340.03		RecName: Full=Tubulin beta-2 chain; AltName: Full=Beta-2-tubulin
LOC_Os01g11460	2.03985	3.24e-19	1.09e-14	yes	up	8.74	38.1267	6.13	9.35	10.74	30.53	39.6	44.25		RecName: Full=RING-H2 finger protein ATL2; AltName: Full=Protein ARABIDOPSIS TOXICOS EN LEVADURA 2; Short=Protein ATL2
LOC_Os02g56020	1.29868	3.33e-19	1.13e-14	yes	up	12.5767	32.0933	11.02	13.12	13.59	30.46	33.93	31.89		RecName: Full=Williams-Beuren syndrome chromosomal region 22 protein homolog
LOC_Os01g33030	1.25516	3.48e-19	1.18e-14	yes	up	23.5767	59.8967	22.6	22.38	25.75	62.51	59.68	57.5		RecName: Full=Ribosome production factor 2 homolog; AltName: Full=Brix domain-containing protein 1 homolog; AltName: Full=Ribosome biogenesis protein RPF2 homolog
LOC_Os07g10840	1.70329	3.65e-19	1.23e-14	yes	up	5.7	19.8067	6.05	5.75	5.3	15.62	22.27	21.53		RecName: Full=Probable galactinol--sucrose galactosyltransferase 2; AltName: Full=Protein SEED IMBIBITION 2; AltName: Full=Raffinose synthase 2
LOC_Os03g50120	1.48435	3.95e-19	1.34e-14	yes	up	10.0533	29.7433	9.55	11.6	9.01	29.08	27.59	32.56		RecName: Full=Zinc finger protein VAR3, chloroplastic; AltName: Full=Protein VARIEGATED 3; Flags: Precursor
LOC_Os01g67100	2.29711	3.96e-19	1.34e-14	yes	up	3.8	19.58	2.83	4.91	3.66	16.69	15.55	26.5		RecName: Full=Chromatin assembly factor 1 subunit FSM; Short=CAF-1 subunit FSM; AltName: Full=CAF-1 p150 homolog; AltName: Full=Protein FASCIATA 1 homolog; AltName
LOC_Os06g22070	1.58861	4.53e-19	1.53e-14	yes	up	17.74	56.6467	14.37	20.46	18.39	61.92	52.47	55.55		_
LOC_Os02g55110	1.42543	5.12e-19	1.73e-14	yes	up	8.63333	24.6267	8.23	10.07	7.6	25.31	23.44	25.13		RecName: Full=QWRF motif-containing protein 4
LOC_Os03g59650	1.61598	5.14e-19	1.74e-14	yes	up	3.00667	9.72667	2.58	3.26	3.18	9.8	8.46	10.92		_
LOC_Os08g23730	1.18063	5.28e-19	1.79e-14	yes	up	56.49	136.427	58.44	58.53	52.5	133.07	132.45	143.76		RecName: Full=GMP synthase
LOC_Os10g35280	1.24955	5.94e-19	2.01e-14	yes	up	10.4267	26.3633	10.6	10.76	9.92	27.34	25.83	25.92		RecName: Full=Nucleolar complex protein 2 homolog; Short=Protein NOC2 homolog
LOC_Os07g10660	1.26237	6.09e-19	2.06e-14	yes	up	52.3867	133.76	48.88	48.03	60.25	135.87	133.46	131.95		RecName: Full=40S ribosomal protein S2-4
LOC_Os01g22490	1.10882	6.14e-19	2.08e-14	yes	up	428.92	990.917	414.23	419.69	452.84	1014.21	902.09	1056.45		RecName: Full=Ubiquitin-40S ribosomal protein S27a-1; Contains: RecName: Full=Ubiquitin; Contains: RecName: Full=40S ribosomal protein S27a-1; Flags: Precursor
LOC_Os04g54240	2.55019	6.27e-19	2.12e-14	yes	up	4.85	30.4233	3.79	4.41	6.35	26.12	23.95	41.2		_
LOC_Os04g09800	2.78905	7.07e-19	2.39e-14	yes	up	0.953333	7.05667	0.8	1.46	0.6	6.53	5.9	8.74		RecName: Full=Putative SWI/SNF-related matrix-associated actin-dependent regulator of chromatin subfamily A member 3-like 3; Short=SMARCA3-like protein 3
LOC_Os02g34740	2.01785	7.07e-19	2.39e-14	yes	up	1.96333	8.89667	1.46	2.18	2.25	9.41	9.12	8.16		_
LOC_Os02g40784	1.945	7.42e-19	2.51e-14	yes	up	2.51	10.31	2.58	2.86	2.09	9.6	9	12.33		RecName: Full=Protein ECERIFERUM 1
LOC_Os06g46270	2.47577	8.31e-19	2.81e-14	yes	up	19.9667	119.687	29.34	17.61	12.95	110.11	127.59	121.36		RecName: Full=NAC domain-containing protein 21/22; Short=ANAC021/ANAC022
LOC_Os01g49290	1.25555	8.88e-19	3e-14	yes	up	229.467	583.707	237.66	246.63	204.11	594.3	552.79	604.03		RecName: Full=Guanine nucleotide-binding protein subunit beta-like protein A; Short=GPB-LR; AltName: Full=RWD; AltName: Full=Receptor for activated C kinase 1A
LOC_Os03g61600	1.15469	9.52e-19	3.22e-14	yes	up	31.29	74.1767	29.01	33.22	31.64	72.21	70.31	80.01		RecName: Full=Phosphoribosylformylglycinamidine cyclo-ligase, chloroplastic; AltName: Full=AIR synthase; Short=AIRS; AltName: Full=Phosphoribosyl-aminoimidazole syn
LOC_Os02g49620	1.22688	9.57e-19	3.24e-14	yes	up	13.67	34.1333	13.17	14.29	13.55	35.39	33.58	33.43		RecName: Full=Ribosomal RNA-processing protein 7 homolog A; AltName: Full=Gastric cancer antigen Zg14
LOC_Os02g45380	4.20196	9.6e-19	3.25e-14	yes	up	0.33	6.62667	0.42	0.46	0.11	4.49	4.9	10.49		RecName: Full=MATE efflux family protein 9; AltName: Full=Protein DETOXIFICATION 1-like 5; AltName: Full=Protein DTX6
LOC_Os01g50200	3.33043	9.98e-19	3.38e-14	yes	up	0.496667	5.31333	0.3	0.71	0.48	3.73	5.2	7.01		RecName: Full=Anthocyanidin 5,3-O-glucosyltransferase; AltName: Full=UDP-glucose: anthocyanidin 5,3-O-glucosyltransferase
LOC_Os02g53500	1.53983	1.13e-18	3.81e-14	yes	up	11.1333	34.7267	10.23	12.94	10.23	34.33	30.25	39.6		RecName: Full=Replication factor C subunit 3; Short=OsRFC3; AltName: Full=Activator 1 subunit 3
LOC_Os01g46060	1.26614	1.17e-18	3.95e-14	yes	up	9.45333	24.22	8.78	9.9	9.68	23.62	26.04	23		_
LOC_Os01g13080	1.29378	1.19e-18	4.04e-14	yes	up	136.087	358.493	128.76	126.57	152.93	374.88	321.19	379.41		RecName: Full=60S acidic ribosomal protein P3; AltName: Full=P1/P2-like
LOC_Os05g22990	1.50964	1.27e-18	4.31e-14	yes	up	6.36	19.2367	5.74	7.51	5.83	20.13	19.98	17.6		_
LOC_Os07g34650	1.88666	1.36e-18	4.6e-14	yes	up	1.81667	6.94	1.75	1.78	1.92	6.41	6.83	7.58		_
LOC_Os05g33080	1.85143	1.42e-18	4.8e-14	yes	up	2.88667	11.07	2.61	2.84	3.21	9.44	10.33	13.44		RecName: Full=Serine/threonine-protein kinase PBS1; AltName: Full=AvrPphB susceptible protein 1
LOC_Os02g14500	1.24923	1.45e-18	4.92e-14	yes	up	36.1767	91.08	31.72	35.1	41.71	87.21	90.74	95.29		_
LOC_Os07g48310	1.24165	1.49e-18	5.05e-14	yes	up	8.48667	21.3067	7.68	9.06	8.72	20.45	22.31	21.16		RecName: Full=Probable inactive receptor kinase At5g58300; Flags: Precursor
LOC_Os08g28080	1.432	1.64e-18	5.53e-14	yes	up	5.35667	15.33	4.58	5.92	5.57	15.95	15.12	14.92		RecName: Full=Coatomer subunit delta-1; AltName: Full=Delta-coat protein 1; Short=Delta-COP 1
LOC_Os06g12460	3.0882	1.65e-18	5.58e-14	yes	up	0.46	4.1	0.49	0.61	0.28	4.58	4.1	3.62		RecName: Full=Probable mannan synthase 3; AltName: Full=Cellulose synthase-like protein A3; AltName: Full=OsCslA3
LOC_Os07g28850	1.20501	1.69e-18	5.71e-14	yes	up	14.5967	35.6667	12.96	16.41	14.42	35.49	35.83	35.68		RecName: Full=Protein argonaute 18; Short=OsAGO18
LOC_Os03g08450	1.161	1.75e-18	5.92e-14	yes	up	56.9833	136.2	58.65	57.02	55.28	141.55	134.24	132.81		RecName: Full=Eukaryotic translation initiation factor 3 subunit K; Short=eIF3k; AltName: Full=eIF-3 p25
LOC_Os03g11540	2.75416	1.78e-18	6.02e-14	yes	up	11.4633	82.2833	8.47	17.66	8.26	66.42	64.51	115.92		RecName: Full=Replication protein A 70 kDa DNA-binding subunit B; Short=OsRPA70b; AltName: Full=Replication factor A protein 1B; AltName: Full=Replication protein
LOC_Os10g11870	1.36513	1.9e-18	6.43e-14	yes	up	24.3733	63.6533	22.15	25.75	25.22	59.29	57.46	74.21		_
LOC_Os04g50990	1.2138	1.93e-18	6.54e-14	yes	up	160.447	398.923	151.31	157.64	172.39	379.96	361.05	455.76		RecName: Full=60S ribosomal protein L12
LOC_Os07g05650	1.85226	2.35e-18	7.95e-14	yes	up	5.74	22.0767	4.96	5.7	6.56	17.93	21.64	26.66		_
LOC_Os09g37006	1.05465	2.59e-18	8.77e-14	yes	up	69.11	153.3	70.27	68.9	68.16	147.66	153.28	158.96		RecName: Full=Interleukin enhancer-binding factor 3-A; AltName: Full=CCAAT box transcription factor subunit; AltName: Full=Double-stranded RNA-binding protein 4F.
LOC_Os05g49030	1.04338	2.7e-18	9.12e-14	yes	up	171.23	377.687	167.56	170.47	175.66	377.02	352.29	403.75		RecName: Full=60S ribosomal protein L18a
LOC_Os05g44320	1.46715	2.82e-18	9.55e-14	yes	up	11.7967	34.62	11.55	13.9	9.94	34.04	33.75	36.07		RecName: Full=Periodic tryptophan protein 2; AltName: Full=U three protein 1; AltName: Full=U3 small nucleolar RNA-associated protein 1; Short=U3 snoRNA-associated pr
LOC_Os02g33820	3.45494	2.84e-18	9.6e-14	yes	up	1.37667	16.2833	2.28	0.93	0.92	18.02	18.74	12.09		RecName: Full=Abscisic stress-ripening protein 3
LOC_Os08g06600	1.94335	3.24e-18	1.09e-13	yes	up	7.13667	29.2233	5.24	9.6	6.57	29.52	26	32.15		_
LOC_Os07g43770	2.28801	3.42e-18	1.16e-13	yes	up	9.62	51.6033	13.18	8.09	7.59	46.02	53.68	55.11		_
LOC_Os04g55700	2.04883	3.77e-18	1.28e-13	yes	up	1.63667	7.14667	1.29	1.63	1.99	7.59	7.81	6.04		RecName: Full=Small RNA degrading nuclease 3
LOC_Os12g01430	1.19762	3.86e-18	1.31e-13	yes	up	26.0233	64.07	24.67	26.42	26.98	67.39	61.58	63.24		RecName: Full=mRNA turnover protein 4 homolog
LOC_Os09g26300	2.6406	4.66e-18	1.58e-13	yes	up	2.84	18.9633	3.24	2.04	3.24	13.08	17.74	26.07		_
LOC_Os09g37920	2.40044	4.92e-18	1.67e-13	yes	up	0.446667	2.47667	0.46	0.5	0.38	2.1	2.18	3.15		RecName: Full=Fanconi anemia group J protein homolog; Short=Protein FACJ; AltName: Full=ATP-dependent RNA helicase BRIP1; AltName: Full=BRCA1-associated C-terminal
LOC_Os12g43363	1.29327	5.31e-18	1.8e-13	yes	up	26.7933	69.0533	24.52	28.45	27.41	65.53	61.46	80.17		RecName: Full=Fatty acid 2-hydroxylase 1; Short=AtFAH1
LOC_Os02g49270	1.23584	5.53e-18	1.87e-13	yes	up	12.25	30.6267	10.49	13.48	12.78	30.72	29.84	31.32		RecName: Full=Putative ribosomal RNA methyltransferase NOP2; AltName: Full=Nucleolar protein 1; AltName: Full=Nucleolar protein 2 homolog; AltName: Full=Proliferat
LOC_Os06g47840	1.24079	5.72e-18	1.93e-13	yes	up	19.1567	48.1267	19.99	18.47	19.01	50.95	46.96	46.47		RecName: Full=Zinc finger protein 622; AltName: Full=Zinc finger-like protein 9
LOC_Os03g26910	1.50669	5.77e-18	1.95e-13	yes	up	26.1767	79.9967	27.86	29.14	21.53	76.3	74.83	88.86		RecName: Full=Probable trehalose-phosphate phosphatase 9; Short=OsTPP9; AltName: Full=Trehalose 6-phosphate phosphatase
LOC_Os11g01420	1.25437	5.87e-18	1.99e-13	yes	up	24.84	63.3433	25.89	24.22	24.41	65.88	63.27	60.88		RecName: Full=mRNA turnover protein 4 homolog
LOC_Os10g08930	1.00183	6.23e-18	2.11e-13	yes	up	289.84	622.493	271.57	290.87	307.08	620.92	595.77	650.79		RecName: Full=40S ribosomal protein S20
LOC_Os08g41400	2.31822	6.32e-18	2.14e-13	yes	up	4.10667	21.2733	3.46	6.04	2.82	22.79	22.51	18.52		_
LOC_Os12g03880	1.48871	6.33e-18	2.14e-13	yes	up	31.1667	93.17	29.61	34.44	29.45	105.43	94.42	79.66		RecName: Full=60S acidic ribosomal protein P0
LOC_Os01g73000	1.58715	6.36e-18	2.15e-13	yes	up	4.70667	15.1267	4.68	5.35	4.09	14.22	16.35	14.81		RecName: Full=E3 ubiquitin-protein ligase RGLG1; AltName: Full=RING domain ligase 1
LOC_Os07g44710	1.21915	6.41e-18	2.17e-13	yes	up	6.7	16.59	6.76	6.82	6.52	16.2	16.78	16.79		RecName: Full=Calcium/calmodulin-dependent serine/threonine-protein kinase 1; AltName: Full=Calcium/calmodulin-binding serine/threonine-protein kinase; Short=CaM-
LOC_Os07g09970	1.82766	6.96e-18	2.35e-13	yes	up	66.15	252.87	83.82	55.64	58.99	210	261.49	287.12		RecName: Full=Protein YLS3; AltName: Full=Protein YELLOW-LEAF-SPECIFIC GENE 3; AltName: Full=Xylogen-like protein 9; Short=AtXYLP9; Flags: Precursor
LOC_Os01g62200	4.78819	7.2e-18	2.44e-13	yes	up	0.11	3.12	0.05	0.2	0.08	2.51	2.76	4.09		RecName: Full=Protein UPSTREAM OF FLC
LOC_Os03g58430	1.11066	7.45e-18	2.52e-13	yes	up	223.487	515.287	200.41	228.98	241.07	539.46	484.24	522.16		RecName: Full=40S ribosomal protein S15
LOC_Os07g42450	1.05472	8e-18	2.71e-13	yes	up	140.703	311.94	143.92	142.65	135.54	317.83	303.15	314.84		RecName: Full=40S ribosomal protein SA
LOC_Os12g04010	1.26977	8.4e-18	2.84e-13	yes	up	11.43	29.2667	10.29	12.81	11.19	29.92	27.75	30.13		RecName: Full=U3 small nucleolar ribonucleoprotein protein MPP10; AltName: Full=M phase phosphoprotein 10
LOC_Os08g45060	1.74317	9.87e-18	3.34e-13	yes	up	2.89667	10.28	2.94	2.42	3.33	11.05	10.71	9.08		RecName: Full=Putative kinase-like protein TMKL1; Flags: Precursor
LOC_Os11g44380	3.50202	1.02e-17	3.46e-13	yes	up	0.863333	10.54	1.06	1.04	0.49	7.5	16.33	7.79		_
LOC_Os01g44394	1.34814	1.09e-17	3.69e-13	yes	up	14.2867	38.68	11.97	15.88	15.01	36.39	39.05	40.6		RecName: Full=Rae1-like protein At1g80670
LOC_Os03g46440	1.31771	1.17e-17	3.97e-13	yes	up	24.9467	66.7767	23.44	26.11	25.29	56.93	65.01	78.39		RecName: Full=Regulatory protein NPR4; AltName: Full=BTB/POZ domain-containing protein NPR4
LOC_Os01g05010	1.61883	1.2e-17	4.07e-13	yes	up	18.9567	61.9233	16.93	16.9	23.04	69.59	53.55	62.63		_
LOC_Os01g55940	2.49304	1.3e-17	4.4e-13	yes	up	15.7867	95.76	24.19	11.9	11.27	84.08	105	98.2		RecName: Full=Probable indole-3-acetic acid-amido synthetase GH3.2; AltName: Full=Auxin-responsive GH3-like protein 2; Short=OsGH3-2
LOC_Os12g06610	1.35698	1.32e-17	4.45e-13	yes	up	9.26333	25.26	9.1	10.39	8.3	23.82	24.41	27.55		RecName: Full=Nucleolar complex protein 2 homolog; Short=Protein NOC2 homolog
LOC_Os02g07430	1.54254	1.62e-17	5.49e-13	yes	up	31.8567	100.94	27.59	35.22	32.76	112.61	107.67	82.54		RecName: Full=MADS-box transcription factor 29; AltName: Full=OsMADS29
LOC_Os11g12650	1.79075	1.69e-17	5.71e-13	yes	up	3.61333	11.86	2.96	4.19	3.69	10.86	10.58	14.14		RecName: Full=PHD finger protein At1g33420
LOC_Os01g72240	1.22391	1.76e-17	5.96e-13	yes	up	50.2867	125.103	50.96	53.96	45.94	128.98	120.57	125.76		RecName: Full=Uridine 5'-monophosphate synthase; Short=UMP synthase; Includes: RecName: Full=Orotate phosphoribosyltransferase; Short=OPRTase; Includes: RecName: F
LOC_Os11g37970	4.71386	1.8e-17	6.07e-13	yes	up	26.9033	764.307	42.2	10.55	27.96	794.09	783.91	714.92		RecName: Full=Wheatwin-1; AltName: Full=Pathogenesis-related protein 4a; AltName: Full=Protein 0.14; AltName: Full=RNase; Flags: Precursor
LOC_Os01g58640	2.05898	1.8e-17	6.1e-13	yes	up	1.36333	6.07333	1.34	1.69	1.06	6.54	5.95	5.73		RecName: Full=Probable inactive purple acid phosphatase 1; Flags: Precursor
LOC_Os02g47140	1.01975	1.89e-17	6.41e-13	yes	up	309.357	670.993	304.8	294.07	329.2	677.94	639.33	695.71		RecName: Full=60S ribosomal protein L12-1
LOC_Os02g42690	1.92858	1.91e-17	6.45e-13	yes	up	1.21	5.32333	1.13	1.24	1.26	4.5	6	5.47		RecName: Full=E3 ubiquitin-protein ligase RMA1; AltName: Full=Protein RING membrane-anchor 1
LOC_Os12g07300	1.34779	1.96e-17	6.64e-13	yes	up	21.6567	55.9733	19.91	24.11	20.95	59.45	56.32	52.15		RecName: Full=UPF0202 protein At1g10490
LOC_Os02g07150	1.63991	1.97e-17	6.67e-13	yes	up	2.72	9.13333	2.37	2.88	2.91	10.63	8.55	8.22		RecName: Full=Urease accessory protein F; Short=AtUREF UREF_ORYSJ RecName: Full=Urease accessory protein F; Short=AtUREF
LOC_Os04g14810	2.84583	2.01e-17	6.79e-13	yes	up	1.25333	9.70333	1.27	1.54	0.95	9.8	10.66	8.65		_
LOC_Os12g07260	1.41256	2.05e-17	6.93e-13	yes	up	23.2067	65.7733	24.04	25.97	19.61	69.63	64.86	62.83		RecName: Full=Pentatricopeptide repeat-containing protein At1g80270, mitochondrial; Flags: Precursor
LOC_Os03g10600	1.37211	2.11e-17	7.14e-13	yes	up	10.6267	27.1067	10.04	11.67	10.17	27.38	26.33	27.61		_
LOC_Os03g53530	1.27869	2.2e-17	7.45e-13	yes	up	15.5367	40.08	14.44	16.9	15.27	42.15	41.32	36.77		RecName: Full=tRNA (guanine-N(7)-)-methyltransferase non-catalytic subunit WDR4; AltName: Full=WD repeat-containing protein 4
LOC_Os09g21450	2.18459	2.27e-17	7.67e-13	yes	up	3.81667	19.3033	2.6	4.72	4.13	20.38	16.33	21.2		RecName: Full=Cyclin-D2-1; AltName: Full=G1/S-specific cyclin-D2-1; Short=CycD2;1
LOC_Os07g41310	2.00406	2.27e-17	7.68e-13	yes	up	4.81667	20.64	5.31	5.46	3.68	21.37	24.1	16.45		RecName: Full=COBRA-like protein 1; AltName: Full=Protein BRITTLE CULM1-like 6; Flags: Precursor
LOC_Os04g30010	2.06762	2.28e-17	7.7e-13	yes	up	2.71333	11.99	3.59	2.07	2.48	10.59	12.04	13.34		RecName: Full=Wall-associated receptor kinase-like 1; Flags: Precursor
LOC_Os01g64820	2.02521	2.3e-17	7.77e-13	yes	up	8.17	35.3167	7.2	11.46	5.85	34.81	32.75	38.39		RecName: Full=DNA polymerase alpha catalytic subunit
LOC_Os01g60330	1.14271	2.32e-17	7.86e-13	yes	up	11.1733	26.0767	10.42	11.37	11.73	25.87	24.34	28.02		RecName: Full=Probable inactive receptor kinase At5g58300; Flags: Precursor
LOC_Os04g41300	1.33986	2.39e-17	8.09e-13	yes	up	19.01	51.37	19.36	19.21	18.46	56.59	49.4	48.12		RecName: Full=Ribosome-recycling factor; Short=RRF; AltName: Full=Ribosome-releasing factor
LOC_Os10g20450	2.26314	2.56e-17	8.66e-13	yes	up	1.76	8.95	1.77	1.38	2.13	10.01	9.82	7.02		RecName: Full=MATE efflux family protein 5; AltName: Full=Protein DETOXIFICATION 1-like 1; AltName: Full=Protein DTX3
LOC_Os01g01060	1.30267	2.6e-17	8.78e-13	yes	up	144.213	381.583	137.5	150.31	144.83	357.57	331.24	455.94		RecName: Full=40S ribosomal protein S5
LOC_Os01g17320	1.27052	2.61e-17	8.83e-13	yes	up	12.04	30.94	11.72	13.3	11.1	28.62	31.05	33.15		RecName: Full=Pentatricopeptide repeat-containing protein At1g80270, mitochondrial; Flags: Precursor
LOC_Os01g12650	1.40307	2.66e-17	8.99e-13	yes	up	23.7767	66.9067	21.27	26.1	23.96	70.07	72.69	57.96		RecName: Full=Reticulon-like protein B1; Short=AtRTNLB1; AltName: Full=VirB2-interacting protein 1
LOC_Os11g11890	1.40886	2.76e-17	9.32e-13	yes	up	11.0133	28.5233	9.32	10.54	13.18	32.63	28.29	24.65		RecName: Full=Cysteine-rich receptor-like protein kinase 10; Short=Cysteine-rich RLK10; AltName: Full=Receptor-like protein kinase 4; Flags: Precursor
LOC_Os09g12270	1.57482	2.77e-17	9.36e-13	yes	up	5.76333	18.25	5.14	6.63	5.52	20.11	18	16.64		RecName: Full=Peptidyl-prolyl cis-trans isomerase FKBP43; Short=PPIase FKBP43; AltName: Full=FK506-binding protein 43; Short=AtFKBP43; AltName: Full=Immunophilin
LOC_Os11g34390	2.07371	2.8e-17	9.47e-13	yes	up	3.45333	15.4533	2.63	3.99	3.74	16.95	17.34	12.07		RecName: Full=Putative glycosyltransferase 7; Short=AtGT7
LOC_Os02g02910	1.65863	4.31e-17	1.46e-12	yes	up	6.14333	20.5667	5.29	6.96	6.18	23.62	21.36	16.72		_
LOC_Os03g59430	2.84484	4.44e-17	1.5e-12	yes	up	0.313333	2.41667	0.35	0.31	0.28	1.94	2.56	2.75		RecName: Full=Probable galactinol--sucrose galactosyltransferase 1; AltName: Full=Protein SEED IMBIBITION 1; AltName: Full=Raffinose synthase 1
LOC_Os07g41190	1.32389	4.47e-17	1.51e-12	yes	up	11.57	30.8167	10.71	13.35	10.65	30.1	29.56	32.79		RecName: Full=U3 small nucleolar RNA-associated protein 18 homolog
LOC_Os07g16950	1.18215	4.5e-17	1.52e-12	yes	up	23.68	57.03	21.32	23.11	26.61	58.5	57.11	55.48		RecName: Full=Protein MAK16 homolog B; AltName: Full=MAK16-like protein B
LOC_Os08g35160	2.16741	5.4e-17	1.82e-12	yes	up	7.03	35.63	5.74	5.26	10.09	41.04	34.99	30.86		RecName: Full=Chaperone protein DnaJ
LOC_Os03g21530	1.30707	5.99e-17	2.03e-12	yes	up	13.6633	36.2767	13.29	15.22	12.48	34.11	33.24	41.48		RecName: Full=Ribosome biogenesis protein BMS1 homolog; AltName: Full=Ribosome assembly protein BMS1 homolog
LOC_Os09g39500	1.0916	6.36e-17	2.15e-12	yes	up	217.607	497.93	199.59	229.46	223.77	523.88	459.11	510.8		RecName: Full=Ubiquitin-60S ribosomal protein L40-2; Contains: RecName: Full=Ubiquitin; Contains: RecName: Full=60S ribosomal protein L40-2; AltName: Full=CEP52;
LOC_Os05g43970	1.59689	6.49e-17	2.19e-12	yes	up	23.2967	76.5	20.8	21.23	27.86	84.15	79.57	65.78		_
LOC_Os03g44530	1.33081	6.57e-17	2.22e-12	yes	up	6.33667	16.99	5.59	6.5	6.92	16.08	16.36	18.53		RecName: Full=Large subunit GTPase 1 homolog
LOC_Os04g01480	1.19844	7e-17	2.37e-12	yes	up	8.14333	19.8367	8.3	8.33	7.8	19.24	19.13	21.14		RecName: Full=Zinc finger CCCH domain-containing protein 24; Short=AtC3H24
LOC_Os04g35660	1.92909	7.5e-17	2.54e-12	yes	up	3.54	17.7033	3.63	4.3	2.69	17.15	19.66	16.3		RecName: Full=NAC domain-containing protein 67; Short=ONAC067
LOC_Os01g16910	1.06839	7.57e-17	2.56e-12	yes	up	35.37	78.98	33.82	36.16	36.13	82.02	73.73	81.19		RecName: Full=Mitochondrial import receptor subunit TOM40-1; AltName: Full=Translocase of outer membrane 40 kDa subunit homolog 1; Contains: RecName: Full=Mitochon
LOC_Os04g56995	4.90246	7.58e-17	2.56e-12	yes	up	0.356667	11.07	0.22	0.21	0.64	10.14	16.88	6.19		_
LOC_Os03g01900	1.20269	8.31e-17	2.81e-12	yes	up	58.91	145.91	60.15	52.93	63.65	145.31	140.54	151.88		RecName: Full=40S ribosomal protein S17-3
LOC_Os11g04190	3.29008	9.71e-17	3.29e-12	yes	up	0.246667	2.57333	0.28	0.31	0.15	3.03	2.47	2.22		RecName: Full=Probable auxin efflux carrier component 1b; AltName: Full=OsPIN1b
LOC_Os01g51020	1.82351	1.04e-16	3.53e-12	yes	up	10.4967	39.6833	8.06	10.22	13.21	42.73	36.43	39.89		RecName: Full=60S ribosomal protein L28-1
LOC_Os12g01200	1.25215	1.09e-16	3.68e-12	yes	up	7.55333	19.4833	7.93	7.95	6.78	18.72	20.12	19.61		RecName: Full=Probable LRR receptor-like serine/threonine-protein kinase At1g67720; Flags: Precursor
LOC_Os03g08440	1.04532	1.11e-16	3.77e-12	yes	up	191.837	424.607	190.54	203.06	181.91	440.78	417.4	415.64		RecName: Full=40S ribosomal protein SA
LOC_Os12g22810	1.2442	1.16e-16	3.91e-12	yes	up	29.2667	67.9267	27.3	29.35	31.15	62.17	61.38	80.23		_
LOC_Os03g44430	1.92677	1.25e-16	4.22e-12	yes	up	3.43333	13.8	2.6	3.61	4.09	13.73	16.32	11.35		RecName: Full=Phosphopantothenoylcysteine decarboxylase subunit SIS2; AltName: Full=Halotolerance protein HAL3; AltName: Full=Sit4 suppressor 2
LOC_Os01g67010	3.96737	1.31e-16	4.43e-12	yes	up	0.413333	6.97	0.65	0.48	0.11	5.74	10.34	4.83		RecName: Full=Loricrin
LOC_Os04g32540	2.20566	1.34e-16	4.53e-12	yes	up	6.56	32.2533	5.58	7.45	6.65	23.19	26.11	47.46		RecName: Full=Serine carboxypeptidase-like 45; Flags: Precursor
LOC_Os07g39350	2.91532	1.34e-16	4.54e-12	yes	up	1.16667	9.35	1.37	1.03	1.1	10.46	12.71	4.88		RecName: Full=Polyol transporter 5; AltName: Full=Protein POLYOL TRANSPORTER 5; Short=AtPLT5; AltName: Full=Sugar-proton symporter PLT5
LOC_Os12g26060	2.49551	1.35e-16	4.55e-12	yes	up	2.17	12.4867	1.99	2.73	1.79	9.05	10.51	17.9		RecName: Full=Putative bifunctional dihydrofolate reductase-thymidylate synthase; Short=DHFR-TS; Includes: RecName: Full=Dihydrofolate reductase; Includes: RecName
LOC_Os05g16240	1.69557	1.36e-16	4.6e-12	yes	up	3.85	12.9967	3.13	3.86	4.56	13.33	11.25	14.41		_
LOC_Os01g53810	1.43398	1.4e-16	4.73e-12	yes	up	15.3567	43.9567	16.86	14.42	14.79	39.91	49.83	42.13		RecName: Full=Probable glutamate carboxypeptidase 2; AltName: Full=Probable glutamate carboxypeptidase II
LOC_Os05g30420	1.44272	1.45e-16	4.92e-12	yes	up	15.5267	45.0367	14.7	13.5	18.38	46.18	43.35	45.58		RecName: Full=Nucleolar protein 16
LOC_Os09g37860	1.06365	1.46e-16	4.94e-12	yes	up	25.5267	56.73	23.61	28.01	24.96	54.75	58.23	57.21		RecName: Full=Putative ribosomal RNA methyltransferase NOP2; AltName: Full=Nucleolar protein 1; AltName: Full=Nucleolar protein 2 homolog; AltName: Full=Proliferat
LOC_Os02g52810	1.03898	1.52e-16	5.14e-12	yes	up	38.85	84.7233	35.81	42.6	38.14	81.56	84.37	88.24		_
LOC_Os03g55280	1.11896	1.57e-16	5.3e-12	yes	up	36.45	84.5133	38.11	37.2	34.04	83.26	84.94	85.34		RecName: Full=Aspartate-semialdehyde dehydrogenase; Short=ASA dehydrogenase; Short=ASADH; AltName: Full=Aspartate-beta-semialdehyde dehydrogenase
LOC_Os04g49780	1.54264	1.69e-16	5.73e-12	yes	up	4.17333	12.9467	4.54	4.6	3.38	12.73	12.07	14.04		_
LOC_Os08g08570	1.18024	1.91e-16	6.45e-12	yes	up	62.6767	151.523	57.91	65.61	64.51	166.64	145.94	141.99		_
LOC_Os01g65150	2.08623	2.07e-16	7e-12	yes	up	3.01667	13.7167	3.12	3.66	2.27	14.72	15.84	10.59		RecName: Full=Protein NRT1/ PTR FAMILY 5.10; Short=AtNPF5.10
LOC_Os05g02010	1.73181	2.09e-16	7.07e-12	yes	up	8.47333	29.86	8.66	7.09	9.67	26.07	26.5	37.01		_
LOC_Os12g03420	3.93849	2.13e-16	7.2e-12	yes	up	0.793333	13.01	0.65	0.47	1.26	11	8.6	19.43		_
LOC_Os03g42770	1.35244	2.17e-16	7.35e-12	yes	up	9.13	24.7133	7.41	10.38	9.6	25.26	24	24.88		RecName: Full=U3 small nucleolar RNA-interacting protein 2; AltName: Full=RRP9 homolog; AltName: Full=U3 small nucleolar ribonucleoprotein-associated 55 kDa protei
LOC_Os06g33520	1.28383	2.19e-16	7.42e-12	yes	up	15.2467	39.3733	13.53	18.03	14.18	40.49	37.31	40.32		RecName: Full=DEAD-box ATP-dependent RNA helicase 31
LOC_Os01g52490	1.08843	2.2e-16	7.44e-12	yes	up	99.05	225.52	89.28	99.27	108.6	225.11	211.47	239.98		RecName: Full=40S ribosomal protein S24-1
LOC_Os07g01870	1.10536	2.53e-16	8.55e-12	yes	up	133.24	305.91	137.76	132.96	129	309.47	324.09	284.17		RecName: Full=60S ribosomal protein L13a-4
LOC_Os02g58300	1.22222	2.59e-16	8.76e-12	yes	up	12.67	31.5133	12.87	13.07	12.07	33.06	30.78	30.7		_
LOC_Os08g02540	1.18371	2.76e-16	9.34e-12	yes	up	20.7	50.14	19.97	19.81	22.32	49.79	46.36	54.27		RecName: Full=Adenylate kinase; Short=AK; AltName: Full=ATP-AMP transphosphorylase; AltName: Full=ATP:AMP phosphotransferase; AltName: Full=Adenylate monophosphate
LOC_Os06g36450	1.21435	2.86e-16	9.69e-12	yes	up	10.3133	25.2133	10.31	10.7	9.93	25.78	26.49	23.37		RecName: Full=Solute carrier family 40 member 1
LOC_Os04g44320	1.63892	3.04e-16	1.03e-11	yes	up	4.67333	15.6967	4.83	4.46	4.73	15.89	18.6	12.6		RecName: Full=Probable metal-nicotianamine transporter YSL12; AltName: Full=Protein YELLOW STRIPE LIKE 12; Short=OsYSL12
LOC_Os01g08550	2.03296	3.28e-16	1.11e-11	yes	up	3.31	14.3733	2.42	4.68	2.83	13.79	14.08	15.25		_
LOC_Os01g70400	1.79874	3.32e-16	1.12e-11	yes	up	5.83667	21.6267	5.81	6.4	5.3	25.44	22.52	16.92		_
LOC_Os11g05614	3.71031	3.41e-16	1.15e-11	yes	up	0.13	1.77667	0.12	0.1	0.17	1.66	2.09	1.58		RecName: Full=NAC domain-containing protein 90; Short=ANAC090
LOC_Os02g47760	1.10275	3.46e-16	1.17e-11	yes	up	12.3067	28.19	11.29	12.88	12.75	28.12	26.65	29.8		RecName: Full=ATPase family AAA domain-containing protein 3
LOC_Os12g41715	1.08196	3.5e-16	1.18e-11	yes	up	72.6267	160.523	70.9	77.7	69.28	168.63	160.55	152.39		RecName: Full=DEAD-box ATP-dependent RNA helicase 9
LOC_Os05g40384	4.71266	3.55e-16	1.2e-11	yes	up	0.0733333	2.04	0.04	0.06	0.12	2.24	1.82	2.06		RecName: Full=Cytochrome P450 714D1; AltName: Full=Protein ELONGATED UPPERMOST INTERNODE 1; Short=EUI1
LOC_Os01g42470	1.21414	3.73e-16	1.26e-11	yes	up	16.6167	41.1533	16.15	17.05	16.65	42.08	41.93	39.45		RecName: Full=N-alpha-acetyltransferase 50; AltName: Full=N-acetyltransferase NAT13; AltName: Full=NatE catalytic subunit
LOC_Os03g61560	1.19685	3.83e-16	1.3e-11	yes	up	19.53	47.6433	17.76	21.91	18.92	46.51	44.08	52.34		RecName: Full=Pumilio homolog 24; Short=APUM-24; Short=AtPUM24
LOC_Os04g40560	2.46487	4.19e-16	1.42e-11	yes	up	6.38333	37.35	5.32	8.06	5.77	41.64	49.15	21.26		_
LOC_Os12g39400	2.78846	4.57e-16	1.55e-11	yes	up	0.773333	5.22	1.08	0.46	0.78	4.14	4.96	6.56		RecName: Full=Zinc finger protein AZF2; AltName: Full=Zinc-finger protein 2
LOC_Os12g41620	1.10878	4.61e-16	1.56e-11	yes	up	15.3767	35.2333	14.53	17.08	14.52	35.18	35.21	35.31		_
LOC_Os02g57260	1.48519	4.65e-16	1.57e-11	yes	up	58.9233	176.04	68.94	56.28	51.55	192.83	178.03	157.26		RecName: Full=3-ketoacyl-CoA thiolase 2, peroxisomal; AltName: Full=Acetyl-CoA acyltransferase 2; AltName: Full=Beta-ketothiolase 2; AltName: Full=Peroxisomal 3-ox
LOC_Os06g37440	1.13658	4.74e-16	1.6e-11	yes	up	65.2733	152.92	66.43	69.74	59.65	158.97	143.57	156.22		RecName: Full=Elongation factor 1-gamma 3; Short=EF-1-gamma 3; AltName: Full=eEF-1B gamma 3
LOC_Os08g36330	2.24989	5.48e-16	1.85e-11	yes	up	2.39	12.04	1.9	2.92	2.35	9.05	10.14	16.93		RecName: Full=DNA polymerase epsilon subunit B; AltName: Full=DNA polymerase II subunit 2 DPB2_CRYNJ RecName: Full=DNA polymerase epsilon
LOC_Os05g42300	1.56375	5.48e-16	1.85e-11	yes	up	5.44667	17.14	5.03	6.7	4.61	16.29	15.84	19.29		_
LOC_Os05g49230	1.19267	5.52e-16	1.87e-11	yes	up	31.81	77.2033	29.75	35.97	29.71	80.17	80.07	71.37		RecName: Full=Putative rRNA methyltransferase; AltName: Full=2'-O-ribose RNA methyltransferase SPB1 homolog
LOC_Os01g64100	2.08794	6.32e-16	2.14e-11	yes	up	2.38667	10.8567	2.76	2.03	2.37	8.33	12.63	11.61		RecName: Full=Acidic endochitinase; Flags: Precursor
LOC_Os09g32520	1.14157	6.32e-16	2.14e-11	yes	up	73.44	173.927	67.92	80.9	71.5	180.96	172.02	168.8		RecName: Full=60S ribosomal protein L32-1
LOC_Os02g55310	1.84737	6.5e-16	2.2e-11	yes	up	1.84	7.04	1.58	1.99	1.95	6.25	6.58	8.29		RecName: Full=Pentatricopeptide repeat-containing protein At5g27460
LOC_Os02g32760	1.38957	7.07e-16	2.39e-11	yes	up	35.43	99.8433	34.49	30.32	41.48	90.88	103.01	105.64		RecName: Full=60S acidic ribosomal protein P2A; Short=P2
LOC_Os06g08090	1.38806	7.26e-16	2.46e-11	yes	up	15.23	42.56	16.6	15.81	13.28	37.04	43.81	46.83		RecName: Full=Heparanase-like protein 3; Flags: Precursor
LOC_Os08g16810	1.79907	7.39e-16	2.5e-11	yes	up	14.3967	54.1033	17.92	13.07	12.2	46.18	52.2	63.93		_
LOC_Os01g48750	1.9538	7.57e-16	2.56e-11	yes	up	2.01333	6.99333	1.59	1.89	2.56	8.16	5.49	7.33		_
LOC_Os11g08050	7.39517	7.6e-16	2.57e-11	yes	up	0.0266667	3.79	0.06	0	0.02	5.45	3.35	2.57		RecName: Full=Ankyrin-1; Short=ANK-1; AltName: Full=Erythrocyte ankyrin
LOC_Os08g10260	2.16659	7.66e-16	2.59e-11	yes	up	1.06667	4.71667	1.33	0.78	1.09	5.49	4.8	3.86		RecName: Full=Disease resistance RPP13-like protein 4
LOC_Os05g05450	1.19011	8.54e-16	2.89e-11	yes	up	7.20333	16.9	6.74	7.33	7.54	17.09	17.06	16.55		RecName: Full=Nucleolar MIF4G domain-containing protein 1; AltName: Full=SGD1 homolog
LOC_Os03g01110	1.61702	9e-16	3.05e-11	yes	up	2.48	8.07667	2.23	3.18	2.03	7.92	8.3	8.01		RecName: Full=Probable methyltransferase TARBP1; AltName: Full=TAR RNA-binding protein 1; AltName: Full=TAR RNA-binding protein of 185 kDa; Short=TRP-185
LOC_Os02g46150	1.21159	9.08e-16	3.07e-11	yes	up	27.69	68.84	29.49	28.44	25.14	71.18	63.68	71.66		RecName: Full=UPF0160 protein MYG1, mitochondrial; Flags: Precursor
LOC_Os05g30530	1.1159	9.83e-16	3.32e-11	yes	up	83.89	194.45	89.72	83.86	78.09	200.5	187.58	195.27		RecName: Full=40S ribosomal protein S4; AltName: Full=SCAR protein SS620
LOC_Os12g43580	2.57148	1.04e-15	3.51e-11	yes	up	0.79	5.04667	1.1	0.8	0.47	4.99	5.31	4.84		_
LOC_Os03g42220	1.27859	1.04e-15	3.53e-11	yes	up	28.99	74.9833	30.4	31.82	24.75	74.5	71.41	79.04		RecName: Full=T-complex protein 1 subunit beta; Short=TCP-1-beta; AltName: Full=CCT-beta
LOC_Os03g40830	1.55657	1.05e-15	3.56e-11	yes	up	30.1967	95.2433	36.83	25	28.76	87.08	91.24	107.41		RecName: Full=Subtilisin-like protease; AltName: Full=Cucumisin-like serine protease; Flags: Precursor
LOC_Os06g49970	4.8651	1.07e-15	3.61e-11	yes	up	2.85333	89.09	4.59	2.39	1.58	101.64	112.64	52.99		RecName: Full=Alpha-amylase isozyme 2A; AltName: Full=1,4-alpha-D-glucan glucanohydrolase; AltName: Full=Alpha-amylase isozyme C2; Flags: Precursor
LOC_Os08g04210	4.6823	1.12e-15	3.77e-11	yes	up	0.326667	8.99333	0.34	0.1	0.54	5.22	4.74	17.02		RecName: Full=Cysteine-rich repeat secretory protein 55; Flags: Precursor
LOC_Os01g51030	2.39213	1.23e-15	4.16e-11	yes	up	3.74333	23.44	3.41	4.81	3.01	21.78	26.66	21.88		_
LOC_Os01g05610	1.74564	1.27e-15	4.29e-11	yes	up	40.74	146.363	35.55	41.27	45.4	127.13	113.79	198.17		RecName: Full=Histone H2B.3
LOC_Os01g09830	2.91443	1.45e-15	4.9e-11	yes	up	5.16	41.8567	2.97	5.03	7.48	27.1	35.82	62.65		RecName: Full=Monothiol glutaredoxin-S2
LOC_Os12g07740	1.19554	1.62e-15	5.47e-11	yes	up	27.23	66.5767	29.57	27.53	24.59	62.96	66.69	70.08		RecName: Full=Eukaryotic translation initiation factor 2 subunit 3; AltName: Full=Eukaryotic translation initiation factor 2 subunit gamma; Short=eIF-2-gamma; AltNam
LOC_Os06g15760	2.08421	1.62e-15	5.48e-11	yes	up	4.58667	20.8167	5.85	4.21	3.7	19.21	26.64	16.6		RecName: Full=Aspartic proteinase Asp1; Short=OSAP1; Short=OsAsp1; AltName: Full=Nucellin-like protein; Flags: Precursor
LOC_Os09g32500	1.03495	1.62e-15	5.49e-11	yes	up	126.4	277.59	115.06	123.47	140.67	276.31	274.75	281.71		RecName: Full=60S ribosomal protein L32-1
LOC_Os02g03710	3.69896	1.76e-15	5.97e-11	yes	up	1.70333	24.1233	1.15	2.59	1.37	13.46	18.13	40.78		_
LOC_Os08g36250	2.64424	1.8e-15	6.09e-11	yes	up	0.85	5.73333	1.13	0.97	0.45	5.68	6.11	5.41		_
LOC_Os01g55730	1.18949	1.84e-15	6.21e-11	yes	up	33.79	82.28	30.94	33.73	36.7	86.96	83.88	76		_
LOC_Os10g41310	1.57096	1.98e-15	6.69e-11	yes	up	9.34	29.42	8.92	9.9	9.2	31.98	33.98	22.3		_
LOC_Os04g42010	1.16425	2e-15	6.76e-11	yes	up	31.7767	76.3633	30.89	35.07	29.37	81.98	74.56	72.55		RecName: Full=La protein 1; Short=AtLa1
LOC_Os04g49790	2.01741	2.25e-15	7.59e-11	yes	up	2.16667	9.3	1.49	2.99	2.02	9.07	8.62	10.21		RecName: Full=Retrovirus-related Pol polyprotein from transposon TNT 1-94; Includes: RecName: Full=Protease; Includes: RecName: Full=Reverse transcriptase; Includes:
LOC_Os04g57700	1.11286	2.28e-15	7.72e-11	yes	up	13.66	30.8533	11.78	14.69	14.51	29.2	31.87	31.49		_
LOC_Os10g31820	1.31908	2.28e-15	7.72e-11	yes	up	12.9933	34.7033	10.92	15.32	12.74	33.36	31.9	38.85		RecName: Full=Protein fluG
LOC_Os06g40440	1.90735	2.3e-15	7.76e-11	yes	up	3.6	14.3367	2.67	4.12	4.01	15	15.61	12.4		_
LOC_Os09g29930	1.15969	2.37e-15	8.01e-11	yes	up	41.5833	96.2133	36.29	43.19	45.27	100.87	101.93	85.84		RecName: Full=Transcription factor BIM1; AltName: Full=BES1-interacting Myc-like protein 1; AltName: Full=Basic helix-loop-helix protein 46; Short=AtbHLH46; Short=
LOC_Os10g26060	1.51549	2.6e-15	8.79e-11	yes	up	2.35	6.80667	2.46	2.25	2.34	7.38	6.39	6.65		RecName: Full=Glutelin type-A 2; AltName: Full=Glutelin type II; Contains: RecName: Full=Glutelin type-A 2 acidic chain; Contains: RecName: Full=Glutelin type-A 2 ba
LOC_Os12g31800	1.08401	2.65e-15	8.95e-11	yes	up	148.78	337.163	144.26	166.78	135.3	327.03	337.13	347.33		RecName: Full=Glycine-rich RNA-binding protein 3, mitochondrial; Short=AtGR-RBP3; AltName: Full=AtRBG3; AltName: Full=Mitochondrial RNA-binding protein 2a; Short=At
LOC_Os03g17760	1.42361	2.68e-15	9.08e-11	yes	up	11.2467	31.46	11.44	9.93	12.37	35	30.5	28.88		RecName: Full=RNA-binding protein 24; AltName: Full=RNA-binding motif protein 24
LOC_Os04g56670	1.24942	2.9e-15	9.8e-11	yes	up	17.3967	44.1033	17.69	16.8	17.7	47.47	41.42	43.42		RecName: Full=U3 small nucleolar ribonucleoprotein protein IMP3; Short=U3 snoRNP protein IMP3
LOC_Os10g26050	1.50328	2.92e-15	9.88e-11	yes	up	6.05667	18.3367	6.59	6.55	5.03	18.32	19.77	16.92		RecName: Full=Probable methionine--tRNA ligase; AltName: Full=Methionyl-tRNA synthetase; Short=MetRS
LOC_Os12g43840	2.42153	2.92e-15	9.89e-11	yes	up	0.746667	4.23333	0.52	0.89	0.83	4.21	3.75	4.74		RecName: Full=Homeobox protein Wariai; AltName: Full=Homeobox protein 1; Short=DdHbx-1
LOC_Os12g04150	6.86932	2.93e-15	9.91e-11	yes	up	0.34	43.5533	0.73	0.21	0.08	31.65	31.94	67.07		RecName: Full=Probable carboxylesterase 17; AltName: Full=AtCXE17
LOC_Os12g04690	4.48381	3.05e-15	1.03e-10	yes	up	0.08	1.91333	0.07	0.08	0.09	2.05	2.81	0.88		_
LOC_Os05g38264	5.1464	3.16e-15	1.07e-10	yes	up	0.26	5.94667	0.15	0.3	0.33	5.57	6.26	6.01		_
LOC_Os07g48020	5.30488	3.21e-15	1.08e-10	yes	up	0.08	3.40667	0.13	0.03	0.08	2.99	4.5	2.73		RecName: Full=Peroxidase 2; Flags: Precursor
LOC_Os03g18840	1.27905	3.35e-15	1.13e-10	yes	up	16.72	43.15	16.04	19.31	14.81	45.17	43.9	40.38		_
LOC_Os07g47990	2.6579	3.91e-15	1.32e-10	yes	up	1.86	13.1167	2.26	2.37	0.95	14.02	15.79	9.54		RecName: Full=Peroxidase 70; AltName: Full=Plasma membrane-bound peroxidase 2b; Short=pmPOX2b; Flags: Precursor
LOC_Os12g36940	3.83182	4.07e-15	1.38e-10	yes	up	0.116667	1.79667	0.09	0.12	0.14	1.66	2.26	1.47		_
LOC_Os03g38000	1.02262	4.28e-15	1.45e-10	yes	up	299.3	649.897	314.62	303.91	279.37	649.97	661.88	637.84		RecName: Full=40S ribosomal protein S3-2
LOC_Os01g32380	2.88755	4.48e-15	1.52e-10	yes	up	4.1	32.7933	1.8	4.49	6.01	26.15	32.36	39.87		_
LOC_Os05g48290	1.37858	4.86e-15	1.64e-10	yes	up	14.3633	39.7133	14.42	16.32	12.35	42.09	41.58	35.47		RecName: Full=T-complex protein 1 subunit beta; Short=TCP-1-beta; AltName: Full=CCT-beta
LOC_Os03g37270	1.3639	5e-15	1.69e-10	yes	up	4.42333	12.1467	4.44	4.53	4.3	12.11	12.49	11.84		RecName: Full=Polyadenylate-binding protein RBP45; Short=Poly(A)-binding protein RBP45; AltName: Full=RNA-binding protein 45; Short=NplRBP45
LOC_Os02g04270	1.22323	5.61e-15	1.9e-10	yes	up	11.44	28.3933	11.52	12.85	9.95	28.39	29.34	27.45		_
LOC_Os02g08364	1.21662	5.72e-15	1.93e-10	yes	up	27.6933	66.1233	28.91	28.81	25.36	64.39	69.98	64		RecName: Full=Probable protein phosphatase 2C 11; Short=OsPP2C11
LOC_Os03g11950	2.25976	5.81e-15	1.96e-10	yes	up	1.87333	9.77667	1.31	2.15	2.16	11.77	10.43	7.13		_
LOC_Os11g26990	1.12903	5.86e-15	1.98e-10	yes	up	23.63	54.99	24.49	24.31	22.09	58.7	54.37	51.9		_
LOC_Os09g27580	1.23227	5.95e-15	2.01e-10	yes	up	8.39667	21.4567	6.84	9.13	9.22	20.11	23.15	21.11		RecName: Full=Probable potassium transporter 17; AltName: Full=OsHAK17
LOC_Os02g43820	1.93353	6.15e-15	2.08e-10	yes	up	9.69667	39.4967	11.25	6.18	11.66	39.21	42.46	36.82		RecName: Full=Ethylene-responsive transcription factor 5; Short=AtERF5; AltName: Full=Ethylene-responsive element-binding factor 5; Short=EREBP-5
LOC_Os05g11550	1.12502	7.12e-15	2.41e-10	yes	up	24.5467	57.0167	25.61	25.89	22.14	55.31	58.49	57.25		RecName: Full=Serine/threonine-protein phosphatase 5; AltName: Full=LePP5
LOC_Os07g19190	1.21125	7.41e-15	2.51e-10	yes	up	22.3333	55.0967	19.79	21.61	25.6	53.47	51.5	60.32		RecName: Full=Probable ribosome biogenesis protein RLP24
LOC_Os11g43590	1.18298	7.43e-15	2.51e-10	yes	up	13.0867	31.56	10.74	13.9	14.62	30.54	30.98	33.16		_
LOC_Os08g41620	4.18583	7.98e-15	2.7e-10	yes	up	0.0533333	0.97	0.07	0.04	0.05	0.88	1.08	0.95		RecName: Full=Ubiquitin carboxyl-terminal hydrolase 2; AltName: Full=Deubiquitinating enzyme 2; Short=AtUBP2; AltName: Full=Ubiquitin thioesterase 2; AltName: Full=
LOC_Os03g14654	9.54398	8.08e-15	2.73e-10	yes	up	0.02	16.4533	0.06	0	0	21.75	17.38	10.23		RecName: Full=Uncharacterized 29.3 kDa protein
LOC_Os06g06940	2.22465	8.34e-15	2.82e-10	yes	up	11.7767	27.82	11	8.04	16.29	21.8	25.59	36.07		RecName: Full=Putative receptor protein kinase ZmPK1; Flags: Precursor
LOC_Os06g08560	1.35613	8.91e-15	3.01e-10	yes	up	2.74667	7.46333	2.66	3.1	2.48	7.56	8.05	6.78		RecName: Full=ABC transporter C family member 13; Short=ABC transporter ABCC.13; Short=AtABCC13; AltName: Full=ATP-energized glutathione S-conjugate pump 11; AltN
LOC_Os02g40440	1.25437	8.98e-15	3.04e-10	yes	up	11.96	30.4067	11.11	12.25	12.52	27.68	28.77	34.77		RecName: Full=GDSL esterase/lipase At5g33370; AltName: Full=Extracellular lipase At5g33370; Flags: Precursor
LOC_Os01g53220	1.7646	9.41e-15	3.18e-10	yes	up	8.39667	30.3667	7.71	8.44	9.04	31.11	37.14	22.85		RecName: Full=Heat stress transcription factor C-1b; AltName: Full=Heat stress transcription factor 11; Short=rHsf11; AltName: Full=Heat stress transcription facto
LOC_Os01g62350	1.37063	1.07e-14	3.62e-10	yes	up	108.623	302.793	89.77	104.3	131.8	322.83	278.06	307.49		RecName: Full=60S ribosomal protein L36-2
LOC_Os03g18410	1.09938	1.09e-14	3.7e-10	yes	up	12.06	27.9733	12.34	12.14	11.7	27.48	28.36	28.08		RecName: Full=DNA-directed RNA polymerases I and III subunit rpac1; Short=RNA polymerases I and III subunit AC1
LOC_Os05g07820	1.35214	1.12e-14	3.79e-10	yes	up	5.17333	14.6167	4.62	5.97	4.93	13.49	12.91	17.45		RecName: Full=LRR receptor-like serine/threonine-protein kinase GSO1; AltName: Full=Protein GASSHO 1; Flags: Precursor
LOC_Os04g58830	1.12564	1.23e-14	4.16e-10	yes	up	32.8533	76.34	32.4	32.71	33.45	84.86	71.02	73.14		RecName: Full=Ribosome biogenesis regulatory protein homolog
LOC_Os02g35950	1.00963	1.26e-14	4.27e-10	yes	up	48.2633	103.517	47.88	46.26	50.65	108.89	101.87	99.79		RecName: Full=Polyadenylate-binding protein RBP45; Short=Poly(A)-binding protein RBP45; AltName: Full=RNA-binding protein 45; Short=NplRBP45
LOC_Os05g19270	1.49303	1.27e-14	4.29e-10	yes	up	3.19333	9.51333	2.48	3.68	3.42	9.13	8.7	10.71		RecName: Full=DNA mismatch repair protein MSH2; AltName: Full=MUS1
LOC_Os12g08800	1.4742	1.32e-14	4.47e-10	yes	up	1.87333	5.51	1.54	2.06	2.02	5.61	5.12	5.8		_
LOC_Os07g39920	2.19507	1.44e-14	4.86e-10	yes	up	0.833333	4.08333	1.1	0.75	0.65	4.48	4.12	3.65		RecName: Full=Formin-like protein 13; AltName: Full=OsFH13; Flags: Precursor
LOC_Os02g39330	1.82755	1.46e-14	4.93e-10	yes	up	40.4933	153.53	37.42	29.18	54.88	135.47	137.93	187.19		RecName: Full=Chitinase 6; AltName: Full=Pathogenesis related (PR)-3 chitinase 6; Flags: Precursor
LOC_Os03g15920	1.59616	1.47e-14	4.96e-10	yes	up	25.06	79.9667	24.14	24.6	26.44	84.37	96.63	58.9		_
LOC_Os12g03360	2.22499	1.5e-14	5.07e-10	yes	up	2.12667	10.4967	1.4	2.7	2.28	8.35	11.44	11.7		_
LOC_Os02g28810	1.06094	1.5e-14	5.08e-10	yes	up	176.987	394.73	180.26	184.83	165.87	413.18	404	367.01		RecName: Full=40S ribosomal protein S8
LOC_Os09g07820	1.02768	1.54e-14	5.22e-10	yes	up	22.0867	48.16	21.32	21.17	23.77	47.48	48.48	48.52		RecName: Full=Exosome complex component RRP41; AltName: Full=Exosome component 4; AltName: Full=Ribosomal RNA-processing protein 41; AltName: Full=p12A
LOC_Os02g37300	2.86753	1.63e-14	5.51e-10	yes	up	72.08	531.14	44.06	108.75	63.43	412.27	815.9	365.25		_
LOC_Os02g21580	1.68062	1.76e-14	5.94e-10	yes	up	1.56	5.30667	1.4	1.91	1.37	5.65	5.3	4.97		RecName: Full=Pentatricopeptide repeat-containing protein At1g62590
LOC_Os10g32500	2.20192	1.76e-14	5.94e-10	yes	up	1.17	5.69333	1.05	1.14	1.32	6.95	6.02	4.11		_
LOC_Os04g47300	2.34174	1.8e-14	6.07e-10	yes	up	1.56667	7.4	1.87	1.5	1.33	8.42	8.46	5.32		RecName: Full=Calcium-dependent protein kinase 29
LOC_Os06g22660	2.023	1.93e-14	6.53e-10	yes	up	3.85333	16.7267	2.66	4.15	4.75	15.83	15.73	18.62		_
LOC_Os03g26229	1.03556	2.06e-14	6.97e-10	yes	up	30.62	63.1633	27.79	30.85	33.22	61.94	63.41	64.14		RecName: Full=40S ribosomal protein S9-1
LOC_Os05g50654	1.62862	2.08e-14	7.03e-10	yes	up	12.6633	41.81	10.39	11.32	16.28	42.61	43.24	39.58		RecName: Full=Mitochondrial import receptor subunit TOM7-1; AltName: Full=Translocase of outer membrane 7 kDa subunit 1
LOC_Os03g08810	1.07742	2.09e-14	7.07e-10	yes	up	55.16	120.003	51.78	57.9	55.8	118.5	132.97	108.54		RecName: Full=H/ACA ribonucleoprotein complex subunit 1; AltName: Full=Nucleolar protein family A member 1; AltName: Full=snoRNP protein GAR1
LOC_Os07g01920	1.15319	2.11e-14	7.15e-10	yes	up	21.3933	50.6967	22.27	23.05	18.86	51.6	48.97	51.52		RecName: Full=Nucleolar GTP-binding protein 1
LOC_Os06g01960	5.29587	2.19e-14	7.42e-10	yes	up	0.156667	6.96667	0.16	0.26	0.05	4.88	6.06	9.96		_
LOC_Os09g25900	1.43489	2.54e-14	8.59e-10	yes	up	6.69333	19.31	7	6.86	6.22	20.6	21.27	16.06		RecName: Full=Probable xyloglucan glycosyltransferase 2; AltName: Full=Cellulose synthase-like protein C2; AltName: Full=OsCslC2
LOC_Os02g45820	1.33914	2.84e-14	9.61e-10	yes	up	20.2433	54.99	18.3	21.82	20.61	54.74	59.66	50.57		RecName: Full=Mitochondrial import inner membrane translocase subunit Tim13
LOC_Os04g28780	3.32123	3.02e-14	1.02e-09	yes	up	0.276667	2.92333	0.28	0.12	0.43	2.73	2.03	4.01		RecName: Full=G-type lectin S-receptor-like serine/threonine-protein kinase At2g19130; Flags: Precursor
LOC_Os05g30340	1.2582	3.31e-14	1.12e-09	yes	up	6.13	15.83	5.66	5.85	6.88	16.28	14.94	16.27		_
LOC_Os01g69970	1.22979	3.48e-14	1.18e-09	yes	up	22.44	56.02	22.47	24.62	20.23	62.39	52.4	53.27		RecName: Full=Uncharacterized WD repeat-containing protein C17D11.16
LOC_Os06g35900	1.14346	3.56e-14	1.2e-09	yes	up	13.0467	30.7633	13.74	13.05	12.35	29.28	29.89	33.12		RecName: Full=Protein BZR1 homolog 3; Short=OsBZR3; AltName: Full=Protein BRASSINAZOLE-RESISTANT 1 homolog 3
LOC_Os03g22350	1.00883	3.58e-14	1.21e-09	yes	up	23.9933	50.9433	21.52	23.82	26.64	51.6	50.96	50.27		RecName: Full=Peter Pan-like protein
LOC_Os09g34910	1.03334	3.66e-14	1.24e-09	yes	up	52.0767	113.263	53.87	54.66	47.7	114.86	115.02	109.91		RecName: Full=DEAD-box ATP-dependent RNA helicase 7
LOC_Os07g48450	1.41226	3.94e-14	1.33e-09	yes	up	73.23	211.177	90.43	66.47	62.79	207.44	208.15	217.94		RecName: Full=NAC transcription factor NAM-B1
LOC_Os06g19640	1.11441	4.05e-14	1.37e-09	yes	up	15.8767	36.9467	15.38	15.81	16.44	34.69	36.28	39.87		_
LOC_Os07g47750	1.64835	4.06e-14	1.37e-09	yes	up	12.2167	40.99	8.93	13.11	14.61	42.51	40.04	40.42		_
LOC_Os02g34990	1.68652	4.1e-14	1.39e-09	yes	up	15.2733	52.6367	17.83	13.88	14.11	42.63	46.1	69.18		_
LOC_Os11g27540	1.2568	4.24e-14	1.43e-09	yes	up	60.2467	154.087	65.79	54.92	60.03	164.12	161.63	136.51		_
LOC_Os01g50900	1.93495	4.25e-14	1.44e-09	yes	up	2.89	11.85	3.11	2.62	2.94	11.06	11.98	12.51		RecName: Full=Germin-like protein 1-2; Flags: Precursor
LOC_Os09g38440	1.40637	4.39e-14	1.49e-09	yes	up	8.99667	24.1433	7.26	9.92	9.81	26.91	25.38	20.14		RecName: Full=Histone-lysine N-methyltransferase, H3 lysine-4 specific; AltName: Full=COMPASS component SET1; AltName: Full=SET domain-containing protein 1
LOC_Os03g22180	1.05342	4.54e-14	1.53e-09	yes	up	216.113	480.007	204.66	199.45	244.23	498.36	444.75	496.91		RecName: Full=60S ribosomal protein L18-3
LOC_Os11g09110	1.6316	4.55e-14	1.54e-09	yes	up	2.38667	11.32	2.52	2.59	2.05	10.66	10.4	12.9		RecName: Full=Probable leucine-rich repeat receptor-like protein kinase At2g33170; Flags: Precursor
LOC_Os03g21160	1.59213	4.68e-14	1.58e-09	yes	up	10	31.8067	7.3	11.56	11.14	36.08	33.09	26.25		RecName: Full=Zinc finger CCCH domain-containing protein 23; Short=OsC3H23
LOC_Os01g16810	2.13486	4.88e-14	1.65e-09	yes	up	1.21667	5.68	1.15	0.92	1.58	5.22	5.5	6.32		RecName: Full=Transcription factor MYB44; AltName: Full=Myb-related protein 44; Short=AtMYB44; AltName: Full=Myb-related protein R1; Short=AtMYBR1
LOC_Os03g20450	1.25619	4.9e-14	1.66e-09	yes	up	5.55667	14.0767	5.03	6.25	5.39	13.8	12.36	16.07		RecName: Full=Probable inactive receptor kinase At5g10020; Flags: Precursor
LOC_Os12g40860	1.61631	4.94e-14	1.67e-09	yes	up	8.15333	26.0467	5.89	10.5	8.07	26.96	26.1	25.08		RecName: Full=F-box/LRR-repeat protein 17; AltName: Full=F-box-like protein 17
LOC_Os02g52460	1.78761	5.15e-14	1.74e-09	yes	up	9.91333	36.41	8.05	12.21	9.48	32.71	29.17	47.35		_
LOC_Os01g38180	1.73818	6.13e-14	2.07e-09	yes	up	1.98333	7.01333	1.91	1.58	2.46	6.8	7.31	6.93		RecName: Full=70 kDa peptidyl-prolyl isomerase; AltName: Full=Peptidyl-prolyl cis-trans isomerase; Short=PPIase; AltName: Full=Rotamase
LOC_Os04g42270	1.0829	6.75e-14	2.28e-09	yes	up	361.85	817.203	330.08	387.81	367.66	910.18	741.99	799.44		RecName: Full=60S ribosomal protein L23A
LOC_Os01g62584	2.85542	6.89e-14	2.33e-09	yes	up	2.34333	17.9867	1.09	2.78	3.16	13.19	13.86	26.91		_
LOC_Os03g63410	1.0114	6.92e-14	2.34e-09	yes	up	62.8767	134.963	63.93	67.12	57.58	137.85	132.14	134.9		RecName: Full=Elongation factor Tu, mitochondrial; Flags: Precursor
LOC_Os01g62190	4.48046	7.43e-14	2.51e-09	yes	up	0.296667	7.26	0.38	0.37	0.14	3.92	6.37	11.49		RecName: Full=Zinc finger protein ZAT7
LOC_Os01g65550	1.30852	7.79e-14	2.64e-09	yes	up	38.4833	101.52	41.43	40.08	33.94	116.37	97.68	90.51		RecName: Full=RNA-binding protein 24; AltName: Full=RNA-binding motif protein 24; AltName: Full=RNA-binding protein SEB-4
LOC_Os02g57070	1.51665	7.87e-14	2.66e-09	yes	up	8.57	26.0967	6.97	7.92	10.82	27.92	25.79	24.58		RecName: Full=Exosome complex component CSL4; AltName: Full=Exosome component 1
LOC_Os05g46430	1.04164	8.89e-14	3.01e-09	yes	up	229.537	517.287	214.99	230.33	243.29	553.83	503.62	494.41		RecName: Full=60S ribosomal protein L28-1
LOC_Os05g49770	1.50481	9.05e-14	3.06e-09	yes	up	5.39667	16.3667	6.53	5.03	4.63	17.11	16.58	15.41		RecName: Full=CTP synthase 1; AltName: Full=CTP synthetase 1; AltName: Full=UTP--ammonia ligase 1
LOC_Os01g64860	3.07033	9.25e-14	3.13e-09	yes	up	0.25	2.24667	0.11	0.4	0.24	2.31	2.36	2.07		RecName: Full=Subtilisin-like protease; AltName: Full=Cucumisin-like serine protease; Flags: Precursor
LOC_Os11g02540	4.64733	9.51e-14	3.22e-09	yes	up	0.173333	4.44	0	0.13	0.39	3.26	4.75	5.31		RecName: Full=Probable WRKY transcription factor 53; AltName: Full=WRKY DNA-binding protein 53
LOC_Os01g60640	2.02187	9.57e-14	3.23e-09	yes	up	15.5333	66.6133	12.44	13.73	20.43	66.72	89.03	44.09		RecName: Full=Probable WRKY transcription factor 30; AltName: Full=WRKY DNA-binding protein 30
LOC_Os11g37090	1.19999	9.57e-14	3.24e-09	yes	up	5.85	14.2733	5.73	5.96	5.86	14.27	15.88	12.67		RecName: Full=Pumilio homolog 12; Short=APUM-12; Short=AtPUM12
LOC_Os01g58660	9.30294	9.68e-14	3.27e-09	yes	up	0	14.7967	0	0	0	10.79	11.22	22.38		_
LOC_Os04g46620	1.17015	1.16e-13	3.91e-09	yes	up	46.47	111.47	48.31	51.61	39.49	110.79	113.25	110.37		RecName: Full=T-complex protein 1 subunit alpha; Short=TCP-1-alpha; AltName: Full=CCT-alpha
LOC_Os05g48855	1.32225	1.18e-13	3.99e-09	yes	up	22.2133	57.3433	20.66	25.22	20.76	59.02	58.59	54.42		_
LOC_Os03g17660	1.54724	1.33e-13	4.49e-09	yes	up	7.12	20.28	8.11	5.86	7.39	18.86	22.16	19.82		_
LOC_Os07g10350	1.23103	1.44e-13	4.87e-09	yes	up	24.27	57.4833	24.33	26.48	22	59.63	58.81	54.01		RecName: Full=Protein RRP5 homolog; AltName: Full=Programmed cell death protein 11
LOC_Os02g47280	2.35958	1.48e-13	5e-09	yes	up	1.84667	10.0633	1.9	1.61	2.03	13.2	10.78	6.21		RecName: Full=Growth-regulating factor 4; Short=OsGRF4; AltName: Full=Transcription activator GRF4
LOC_Os03g62200	5.50875	1.52e-13	5.13e-09	yes	up	0.0533333	2.43667	0.05	0	0.11	2.98	2.91	1.42		RecName: Full=Ammonium transporter 3 member 2; Short=OsAMT3;2
LOC_Os02g04240	1.95027	1.56e-13	5.28e-09	yes	up	3.34333	13.71	2.55	4.07	3.41	13.14	9.92	18.07		RecName: Full=Wee1-like protein kinase
LOC_Os02g30800	1.65836	1.62e-13	5.48e-09	yes	up	5.72667	19.1867	5	7.77	4.41	17.84	17.82	21.9		RecName: Full=DNA polymerase epsilon catalytic subunit A; AltName: Full=DNA polymerase 2 a; Short=AtPOL2a; AltName: Full=DNA polymerase II subunit a; AltName: Ful
LOC_Os07g07070	1.62638	1.65e-13	5.58e-09	yes	up	1.54	5.04667	1.48	1.41	1.73	5.3	5.8	4.04		RecName: Full=Leucine-rich repeat extensin-like protein 3; Short=AtLRX3; Short=LRR/EXTENSIN3; AltName: Full=Cell wall hydroxyproline-rich glycoprotein; Flags: Precu
LOC_Os01g73170	2.03974	1.71e-13	5.78e-09	yes	up	40.38	178.727	59	30.39	31.75	152.79	214.17	169.22		RecName: Full=Cationic peroxidase SPC4; Flags: Precursor
LOC_Os02g34460	1.13942	1.73e-13	5.84e-09	yes	up	28.5433	67.2833	27.07	26.24	32.32	63.29	73.04	65.52		RecName: Full=40S ribosomal protein S10
LOC_Os01g37910	1.20891	1.85e-13	6.27e-09	yes	up	33.4367	79.9033	36.95	31.27	32.09	71.77	79	88.94		RecName: Full=Vacuolar-processing enzyme; Short=VPE; Flags: Precursor
LOC_Os07g08500	2.38314	1.95e-13	6.6e-09	yes	up	6.53	32.97	4.94	9.15	5.5	24.53	26.3	48.08		RecName: Full=DNA (cytosine-5)-methyltransferase 1B; Short=OsMET1b; AltName: Full=DNA methyltransferase 1-2; Short=OsMET1-2
LOC_Os02g31140	1.92311	2.05e-13	6.93e-09	yes	up	4.04333	15.29	3.1	4.3	4.73	17.08	16.37	12.42		_
LOC_Os04g52361	1.0202	2.16e-13	7.29e-09	yes	up	116.427	252.88	102.99	117.01	129.28	262.82	248.38	247.44		RecName: Full=40S ribosomal protein S11
LOC_Os05g26040	1.25354	2.16e-13	7.3e-09	yes	up	3.5	8.84333	3.3	3.25	3.95	8.78	9.75	8		RecName: Full=Pumilio homolog 4; Short=APUM-4; Short=AtPUM4
LOC_Os09g09650	4.86825	2.19e-13	7.42e-09	yes	up	0.116667	4.20667	0.17	0.09	0.09	1.54	2.13	8.95		_
LOC_Os06g08790	1.46271	2.35e-13	7.94e-09	yes	up	7.55667	22.0933	6.2	9.87	6.6	21.95	21.71	22.62		RecName: Full=Origin recognition complex subunit 1; Short=DmORC1
LOC_Os06g03720	2.25156	2.41e-13	8.14e-09	yes	up	13.0867	66.57	9.39	17.23	12.64	51.35	46.53	101.83		RecName: Full=Ribonucleoside-diphosphate reductase small chain; AltName: Full=Ribonucleoside-diphosphate reductase R2 subunit; AltName: Full=Ribonucleotide reductase
LOC_Os07g08390	1.52042	2.5e-13	8.45e-09	yes	up	4.58667	13.8633	3.62	4.4	5.74	12.61	15.01	13.97		_
LOC_Os02g05040	1.37765	2.63e-13	8.89e-09	yes	up	2.36333	6.50667	1.91	2.74	2.44	6.23	6.28	7.01		_
LOC_Os09g12780	2.26943	2.71e-13	9.17e-09	yes	up	4.59	23.73	2.73	5.61	5.43	19.04	23.16	28.99		_
LOC_Os10g39850	2.1282	2.79e-13	9.43e-09	yes	up	1.95	8.82333	1.43	2.58	1.84	7.15	7.25	12.07		_
LOC_Os02g01350	1.41983	2.85e-13	9.64e-09	yes	up	8.89333	25.3267	8.08	10.76	7.84	22.93	22.9	30.15		_
LOC_Os06g06950	4.47355	2.87e-13	9.72e-09	yes	up	0.0933333	2.18333	0.11	0.08	0.09	2.17	2.77	1.61		_
LOC_Os09g39490	1.85995	2.88e-13	9.75e-09	yes	up	4.46667	17.3767	3.58	5.75	4.07	16.46	15.36	20.31		_
LOC_Os06g03780	1.09504	2.91e-13	9.84e-09	yes	up	13.06	29.6633	11.77	15.08	12.33	30.15	28.66	30.18		RecName: Full=Nucleolar protein 10
LOC_Os02g55080	1.1846	3.43e-13	1.16e-08	yes	up	12.82	31.77	13.19	13.25	12.02	28.68	31.58	35.05		_
LOC_Os09g36820	2.17962	3.54e-13	1.2e-08	yes	up	1.89	9.07333	1.22	1.89	2.56	7.96	7.91	11.35		_
LOC_Os08g09210	1.10334	3.8e-13	1.29e-08	yes	up	10.7033	24.5033	11.45	10.57	10.09	23.09	24.23	26.19		RecName: Full=Phosphoribosylamine--glycine ligase, chloroplastic; AltName: Full=Glycinamide ribonucleotide synthetase; Short=GARS; AltName: Full=Phosphoribosylglyci
LOC_Os02g07730	3.38645	3.81e-13	1.29e-08	yes	up	0.776667	8.94667	0.27	0.68	1.38	10.92	9.7	6.22		_
LOC_Os07g42750	1.11422	3.83e-13	1.3e-08	yes	up	12.8167	29.74	13.13	14.1	11.22	31.26	30.63	27.33		_
LOC_Os03g58890	1.86986	3.9e-13	1.32e-08	yes	up	3.47	13.46	2.86	2.81	4.74	13.04	12.47	14.87		RecName: Full=Probable prolyl 4-hydroxylase 7; Flags: Precursor
LOC_Os06g49250	1.38691	3.91e-13	1.32e-08	yes	up	21.91	63.2067	24.98	18.55	22.2	65.41	72.2	52.01		RecName: Full=Protein NRT1/ PTR FAMILY 8.5; Short=AtNPF8.5; AltName: Full=Peptide transporter PTR6
LOC_Os12g34980	1.0399	4.01e-13	1.36e-08	yes	up	10.8667	23.81	10.61	11.23	10.76	23.51	23.6	24.32		_
LOC_Os11g44910	3.01698	4.28e-13	1.45e-08	yes	up	0.87	7.50333	0.54	1.4	0.67	5.08	5.46	11.97		RecName: Full=ATP-dependent DNA helicase Q-like 1; AltName: Full=RecQ-like protein 1; Short=AtRecQ1; Short=AtRecQl1
LOC_Os02g35140	1.30711	4.39e-13	1.49e-08	yes	up	12.23	32.2367	13.36	12.67	10.66	35.72	33.1	27.89		RecName: Full=Auxin response factor 7
LOC_Os01g66500	1.36609	4.57e-13	1.54e-08	yes	up	13.35	36.6133	14.42	15.29	10.34	36.38	36.71	36.75		RecName: Full=Probable phosphoribosylformylglycinamidine synthase, chloroplastic/mitochondrial; Short=FGAM synthase; Short=FGAMS; AltName: Full=Formylglycinamide r
LOC_Os01g12250	2.00536	4.58e-13	1.55e-08	yes	up	1.86333	7.68333	1.36	2.28	1.95	6.23	6.89	9.93		_
LOC_Os01g10370	2.49486	4.67e-13	1.58e-08	yes	up	2.85	17.0067	1.33	3.58	3.64	13.6	21.28	16.14		RecName: Full=Dehydration-responsive element-binding protein 3; AltName: Full=Protein TINY 2
LOC_Os11g05570	1.34878	5.15e-13	1.74e-08	yes	up	10.7167	29.0067	9.19	11.98	10.98	28.51	33.02	25.49		RecName: Full=Ribonuclease H2 subunit A; Short=RNase H2 subunit A; AltName: Full=Ribonuclease HI large subunit; Short=RNase HI large subunit; AltName: Full=Ribonuc
LOC_Os03g05040	1.43971	5.28e-13	1.79e-08	yes	up	5.02333	14.5	4.74	6.29	4.04	14.04	13.67	15.79		_
LOC_Os12g35010	1.64816	5.34e-13	1.81e-08	yes	up	1.74667	5.81	1.5	1.78	1.96	6.28	5.53	5.62		_
LOC_Os02g18830	1.00883	5.45e-13	1.84e-08	yes	up	25.6267	55.0867	26.63	24.3	25.95	54.48	55.42	55.36		RecName: Full=Ribosomal RNA small subunit methyltransferase NEP1; AltName: Full=18S rRNA (pseudouridine-N1-)-methyltransferase NEP1; AltName: Full=Nucleolar protein
LOC_Os02g47510	5.56014	5.73e-13	1.94e-08	yes	up	0.0333333	1.68667	0.06	0	0.04	1.26	2.21	1.59		RecName: Full=Probable carotenoid cleavage dioxygenase 4, chloroplastic; Short=AtCCD4; AltName: Full=AtNCED4; Flags: Precursor
LOC_Os07g27180	1.30554	5.81e-13	1.97e-08	yes	up	4.59667	12.0633	3.99	5.34	4.46	13.24	12.39	10.56		_
LOC_Os08g11599	3.36906	5.87e-13	1.99e-08	yes	up	0.94	9.06667	0.82	0.95	1.05	9.26	5.76	12.18		_
LOC_Os04g32740	2.01031	5.91e-13	2e-08	yes	up	5.13667	22.21	7.21	3.76	4.44	19.03	27.37	20.23		RecName: Full=Nudix hydrolase 13, mitochondrial; Short=AtNUDT13; Flags: Precursor
LOC_Os12g10740	1.6159	6.06e-13	2.05e-08	yes	up	3.50333	11.41	3.65	3.74	3.12	13.09	12.65	8.49		RecName: Full=Probable leucine-rich repeat receptor-like protein kinase At5g49770; Flags: Precursor
LOC_Os07g45360	1.03322	6.24e-13	2.11e-08	yes	up	7.52333	16.2933	7.24	7.79	7.54	16.78	16.46	15.64		RecName: Full=DEAD-box ATP-dependent RNA helicase 57
LOC_Os03g46070	2.4599	6.37e-13	2.16e-08	yes	up	5.97	35.62	9.78	4.58	3.55	34.67	32.47	39.72		RecName: Full=Zeamatin; Flags: Precursor
LOC_Os02g45225	2.19843	6.76e-13	2.28e-08	yes	up	7.56333	37.0667	6.47	5.03	11.19	36.59	43.58	31.03		_
LOC_Os06g43690	1.22543	6.78e-13	2.29e-08	yes	up	11.9767	29.8133	12.74	12.96	10.23	32.21	29.16	28.07		RecName: Full=WD repeat-containing protein 36; AltName: Full=T-cell activation WD repeat-containing protein; Short=TA-WDRP
LOC_Os03g10150	1.89068	6.94e-13	2.35e-08	yes	up	3.18667	12.6667	3.16	3.42	2.98	9.4	14.6	14		_
LOC_Os07g25440	1.33651	7.4e-13	2.5e-08	yes	up	18.61	50.0933	20.06	21.06	14.71	51.73	51.59	46.96		RecName: Full=Ribosome biogenesis protein bop1; AltName: Full=Block of proliferation 1 protein
LOC_Os02g11960	1.49014	7.54e-13	2.55e-08	yes	up	3.23	9.57333	2.27	3.81	3.61	9.56	9.48	9.68		RecName: Full=ABC transporter A family member 7; Short=ABC transporter ABCA.7; Short=AtABCA7; AltName: Full=Probable ABC2 homolog 6
LOC_Os04g49680	1.646	7.82e-13	2.64e-08	yes	up	5.61667	18.82	4.9	6.39	5.56	15.33	18.73	22.4		_
LOC_Os01g13210	1.32498	8e-13	2.71e-08	yes	up	9.12667	24.3433	8.22	8.81	10.35	20.67	26.63	25.73		RecName: Full=Salt stress root protein RS1
LOC_Os08g35910	2.00051	8.03e-13	2.72e-08	yes	up	0.98	4.42667	0.87	1.2	0.87	5.2	4.59	3.49		_
LOC_Os06g40950	1.11534	8.13e-13	2.75e-08	yes	up	29.1033	59.8	25.9	30.01	31.4	61.01	59.5	58.89		RecName: Full=DNA-directed RNA polymerase I subunit rpa1; Short=RNA polymerase I subunit A1; AltName: Full=DNA-directed RNA polymerase I largest subunit; AltName: F
LOC_Os08g44540	1.89819	8.66e-13	2.93e-08	yes	up	2.82667	11.31	3.12	3.09	2.27	11.51	11.71	10.71		_
LOC_Os03g03140	1.25052	8.73e-13	2.95e-08	yes	up	11.4567	29.0233	10.56	11.82	11.99	32.58	28.36	26.13		_
LOC_Os05g45270	1.33204	8.98e-13	3.04e-08	yes	up	22.02	59.0133	17.47	21.37	27.22	58.55	61.67	56.82		RecName: Full=50S ribosomal protein L9
LOC_Os05g41610	1.90444	9.17e-13	3.1e-08	yes	up	26.2067	105.743	37.53	19.94	21.15	90.85	100.57	125.81		RecName: Full=Putative glucan endo-1,3-beta-glucosidase GVI; AltName: Full=(1-)3)-beta-glucan endohydrolase GVI; AltName: Full=(1-)3)-beta-glucanase isoenzyme GVI; Al
LOC_Os10g10620	7.66429	9.24e-13	3.12e-08	yes	up	0.0466667	10.5333	0	0.14	0	8.2	11.53	11.87		_
LOC_Os05g36050	1.62374	9.75e-13	3.3e-08	yes	up	7.49	24.28	5.07	8.59	8.81	22.87	21.45	28.52		RecName: Full=Probable serine/threonine-protein kinase At1g01540
LOC_Os09g29190	1.23906	9.99e-13	3.38e-08	yes	up	14.9333	37.84	15.75	14.66	14.39	43.4	38.82	31.3		RecName: Full=Phosphoribosylaminoimidazole-succinocarboxamide synthase, chloroplastic; AltName: Full=SAICAR synthetase; Flags: Precursor
LOC_Os03g11970	1.36585	1.02e-12	3.44e-08	yes	up	8.98667	24.69	8.59	10.98	7.39	24.54	25.42	24.11		RecName: Full=Tubulin alpha-2 chain; AltName: Full=Alpha-2-tubulin
LOC_Os01g47660	1.0029	1.06e-12	3.58e-08	yes	up	153.763	329.737	138	160.86	162.43	343.74	291.52	353.95		RecName: Full=60S ribosomal protein L18a
LOC_Os10g39840	4.12526	1.09e-12	3.68e-08	yes	up	0.183333	3.53667	0.2	0.35	0	3.24	3.74	3.63		RecName: Full=Probable xyloglucan endotransglucosylase/hydrolase protein 32; Short=At-XTH32; Short=XTH-32; Flags: Precursor
LOC_Os02g53120	1.50274	1.17e-12	3.94e-08	yes	up	5.14	14.4067	4.5	6.12	4.8	12.84	12.97	17.41		RecName: Full=Separase; AltName: Full=Protein EXTRA SPINDLE POLES; Short=AtESP; AltName: Full=Protein RADIALLY SWOLLEN 4
LOC_Os01g66290	1.4265	1.19e-12	4.03e-08	yes	up	94.9133	270.12	79.76	98.34	106.64	317.52	287.09	205.75		RecName: Full=MADS-box transcription factor 21; AltName: Full=OsMADS21; AltName: Full=RMADS207
LOC_Os09g12500	1.02923	1.23e-12	4.15e-08	yes	up	12.39	26.83	10.55	12.97	13.65	26.32	26.93	27.24		_
LOC_Os12g38180	1.08676	1.4e-12	4.74e-08	yes	up	14.8733	33.4233	12.32	14.84	17.46	34.01	35.91	30.35		RecName: Full=Heat shock 70 kDa protein
LOC_Os09g01610	1.41407	1.46e-12	4.95e-08	yes	up	4.91	13.56	4.32	5.8	4.61	14.51	13.26	12.91		RecName: Full=Clumping factor B; AltName: Full=Fibrinogen receptor B; AltName: Full=Fibrinogen-binding protein B; Flags: Precursor
LOC_Os11g23080	5.65382	1.47e-12	4.97e-08	yes	up	0.41	21.67	0.15	0.56	0.52	7.2	8.25	49.56		_
LOC_Os02g44040	2.83299	1.71e-12	5.78e-08	yes	up	0.473333	3.63333	0.34	0.73	0.35	3.26	3.55	4.09		_
LOC_Os02g54530	6.46655	1.95e-12	6.6e-08	yes	up	0.13	12.3067	0.25	0	0.14	13.14	9.1	14.68		RecName: Full=Pathogenesis-related protein PR-1; Flags: Precursor
LOC_Os11g05180	1.83118	1.99e-12	6.75e-08	yes	up	2.2	7.93	2.08	2.39	2.13	6.41	9.94	7.44		_
LOC_Os11g38210	9.2059	2.19e-12	7.4e-08	yes	up	0	14.3233	0	0	0	19.72	18.58	4.67		_
LOC_Os01g04920	1.08186	2.23e-12	7.55e-08	yes	up	12.79	29.2733	13.54	11.78	13.05	26.45	30.2	31.17		RecName: Full=GDP-mannose-dependent alpha-mannosyltransferase; AltName: Full=Guanosine diphosphomannose-dependent alpha-mannosyltransferase
LOC_Os08g44180	1.21697	2.31e-12	7.81e-08	yes	up	3.95	11.1567	3.75	4.25	3.85	11.06	10.12	12.29		_
LOC_Os03g22740	1.15994	2.5e-12	8.47e-08	yes	up	60.8333	143.173	58.92	66.67	56.91	159.92	145.23	124.37		RecName: Full=Probable nucleolar protein 5-2; AltName: Full=MAR-binding NOP56/58 homolog 2; AltName: Full=Nucleolar protein 58-2
LOC_Os09g29460	1.37255	2.74e-12	9.25e-08	yes	up	52.89	145.91	55.8	47.54	55.33	141.65	180.15	115.93		RecName: Full=Homeobox-leucine zipper protein HOX4; AltName: Full=HD-ZIP protein HOX4; AltName: Full=Homeodomain transcription factor HOX4; AltName: Full=OsHox4
LOC_Os03g63300	1.74291	2.82e-12	9.54e-08	yes	up	2.11667	7.51	1.5	2.65	2.2	6.45	7.89	8.19		RecName: Full=CTD small phosphatase-like protein 2; Short=CTDSP-like 2
LOC_Os04g42200	1.83121	3.11e-12	1.05e-07	yes	up	4.16	15.7933	2.88	4.86	4.74	13.48	15.55	18.35		_
LOC_Os01g04280	2.16782	3.19e-12	1.08e-07	yes	up	13.7333	66.1533	12.68	15.59	12.93	59.82	102.4	36.24		_
LOC_Os05g17849	1.26802	3.21e-12	1.09e-07	yes	up	9.34333	24.1167	8.44	10.37	9.22	21.19	23.95	27.21		_
LOC_Os06g22390	2.61891	3.3e-12	1.12e-07	yes	up	1.48333	9.82333	1.52	1.84	1.09	9.92	11.83	7.72		_
LOC_Os07g43980	1.17851	3.57e-12	1.21e-07	yes	up	7.67667	18.4833	6.96	8	8.07	16.56	17.62	21.27		RecName: Full=DEAD-box ATP-dependent RNA helicase 36
LOC_Os04g37760	1.74382	3.69e-12	1.25e-07	yes	up	7.50667	38.0333	7.15	7.05	8.32	48.34	42.1	23.66		_
LOC_Os06g12610	2.29132	3.73e-12	1.26e-07	yes	up	1.86667	9.83667	2.8	1.55	1.25	8.03	12.77	8.71		RecName: Full=Probable auxin efflux carrier component 1c; AltName: Full=OsPIN1c
LOC_Os05g38860	5.48407	3.78e-12	1.28e-07	yes	up	0.2	9.58	0.07	0.36	0.17	10.41	15.81	2.52		_
LOC_Os02g38470	1.68345	3.96e-12	1.34e-07	yes	up	0.993333	3.39667	0.93	1.06	0.99	2.91	2.99	4.29		RecName: Full=B3 domain-containing protein Os02g0598200
LOC_Os02g49780	1.12704	4.04e-12	1.37e-07	yes	up	15.4967	36.07	13.95	16.17	16.37	39.08	35.26	33.87		_
LOC_Os02g26850	1.15112	4.06e-12	1.37e-07	yes	up	8.39	19.8267	8.27	8.52	8.38	20.59	20.35	18.54		RecName: Full=rRNA-processing protein utp23; AltName: Full=U three protein 23
LOC_Os03g57280	1.03141	4.11e-12	1.39e-07	yes	up	11.19	24.3833	11.89	11.28	10.4	23.59	24.53	25.03		RecName: Full=Probable tRNA (guanine(26)-N(2))-dimethyltransferase 1; AltName: Full=tRNA 2,2-dimethylguanosine-26 methyltransferase 1; AltName: Full=tRNA(guanine-2
LOC_Os12g05080	1.85714	4.25e-12	1.44e-07	yes	up	1.63	6.28	1.39	1.95	1.55	6.37	7.51	4.96		RecName: Full=Protein trichome birefringence-like 11
LOC_Os06g04190	1.46014	4.49e-12	1.52e-07	yes	up	6.04	18.5567	6.14	6.71	5.27	14.88	18.63	22.16		_
LOC_Os04g31000	1.02081	4.53e-12	1.53e-07	yes	up	7.56333	16.3067	7.06	8.42	7.21	16.64	16.18	16.1		RecName: Full=Methyltransferase-like protein 13
LOC_Os07g35510	3.71264	4.57e-12	1.55e-07	yes	up	0.27	3.82333	0.56	0.09	0.16	3.09	2.96	5.42		RecName: Full=Glucan endo-1,3-beta-glucosidase 12; AltName: Full=(1-)3)-beta-glucan endohydrolase 12; Short=(1-)3)-beta-glucanase 12; AltName: Full=Beta-1,3-endogl
LOC_Os01g62300	1.1382	4.6e-12	1.55e-07	yes	up	27.9833	65.6633	31.87	24.78	27.3	66.61	68.37	62.01		_
LOC_Os05g27820	1.20975	4.73e-12	1.6e-07	yes	up	51.83	127.303	38.84	58.95	57.7	131.65	122.64	127.62		RecName: Full=Patellin-6
LOC_Os07g02850	5.37397	5.08e-12	1.72e-07	yes	up	0.13	5.96333	0.32	0	0.07	4.38	4.1	9.41		_
LOC_Os05g50640	1.42226	5.09e-12	1.72e-07	yes	up	2.61667	7.42	2.75	2.7	2.4	7.35	6.27	8.64		RecName: Full=Zinc finger BED domain-containing protein RICESLEEPER 3; AltName: Full=Transposase-like protein RICESLEEPER 3
LOC_Os09g39650	2.04021	5.12e-12	1.73e-07	yes	up	0.963333	4.16	0.7	0.92	1.27	3.4	4.94	4.14		RecName: Full=Probable LRR receptor-like serine/threonine-protein kinase At1g06840; Flags: Precursor
LOC_Os04g41875	1.98162	5.12e-12	1.73e-07	yes	up	1.83333	7.75667	1.94	2.18	1.38	5.71	8.99	8.57		RecName: Full=Carbonyl reductase
LOC_Os10g42960	3.16665	5.38e-12	1.82e-07	yes	up	0.566667	5.45333	0.8	0.45	0.45	7.01	7.23	2.12		RecName: Full=Urea-proton symporter DUR3; Short=OsDUR3; AltName: Full=High-affinity urea active transporter DUR3
LOC_Os07g02100	1.92572	5.61e-12	1.9e-07	yes	up	2.03667	8.28667	2.69	1.69	1.73	8.67	9.42	6.77		RecName: Full=Flavin-containing monooxygenase FMO GS-OX-like 8; AltName: Full=Flavin-monooxygenase glucosinolate S-oxygenase-like 8
LOC_Os01g74020	2.60311	5.75e-12	1.94e-07	yes	up	2.13	13.7267	1.72	2.64	2.03	15.28	19.16	6.74		RecName: Full=Transcription factor PCL1; AltName: Full=Protein PHYTOCLOCK 1 homolog; Short=OsPCL1
LOC_Os01g74540	1.28102	6.39e-12	2.16e-07	yes	up	25.2067	65.63	24.07	22.3	29.25	55.13	64.07	77.69		RecName: Full=Putative GATA transcription factor 22
LOC_Os12g09590	1.01296	6.61e-12	2.23e-07	yes	up	12.71	27.0733	10.57	13.73	13.83	26.88	27.64	26.7		RecName: Full=Protein SUPPRESSOR OF GENE SILENCING 3 homolog; Short=OsSGS3
LOC_Os06g04340	1.13197	6.83e-12	2.31e-07	yes	up	7.89333	18.4533	7.19	8.61	7.88	19.96	17.43	17.97		_
LOC_Os05g38850	1.57891	6.88e-12	2.33e-07	yes	up	1.59333	5.06333	1.37	2.02	1.39	4.65	4.73	5.81		RecName: Full=Probable DNA helicase MCM8; AltName: Full=Minichromosome maintenance 8
LOC_Os01g62440	1.05164	7.04e-12	2.38e-07	yes	up	6.57	14.48	6.11	7.24	6.36	14.15	15.57	13.72		RecName: Full=Ribonuclease II, chloroplastic/mitochondrial; Short=AtmtRNaseII; Short=RNase II; AltName: Full=Protein EMBRYO DEFECTIVE 2730; AltName: Full=Ribonucleo
LOC_Os09g28040	1.14662	7.22e-12	2.44e-07	yes	up	4.23333	9.42	3.3	4.42	4.98	8.95	9.75	9.56		RecName: Full=Prolyl endopeptidase-like; AltName: Full=Prolylendopeptidase-like
LOC_Os07g36490	1.2402	7.3e-12	2.47e-07	yes	up	20.55	53.46	16.79	20.91	23.95	57.22	54.79	48.37		RecName: Full=Glycine-rich RNA-binding protein 5, mitochondrial; Short=AtGR-RBP5; AltName: Full=AtRBG5; AltName: Full=Mitochondrial RNA-binding protein 2b; Short=At
LOC_Os08g27824	1.0888	7.33e-12	2.48e-07	yes	up	7.91	17.87	7.33	8.66	7.74	18.83	18.26	16.52		RecName: Full=Putative methyltransferase NSUN6; AltName: Full=NOL1/NOP2/Sun domain family member 6
LOC_Os11g06750	1.07653	7.47e-12	2.53e-07	yes	up	215.347	485.04	233.26	230.43	182.35	486.05	479.9	489.17		RecName: Full=60S ribosomal protein L3
LOC_Os01g32460	4.48202	7.52e-12	2.54e-07	yes	up	0.293333	7.26333	0.07	0.73	0.08	5.77	5.85	10.17		_
LOC_Os11g47530	7.32925	8.53e-12	2.88e-07	yes	up	0.03	4.94	0	0.04	0.05	4.37	4.99	5.46		RecName: Full=Xylanase inhibitor protein 2; AltName: Full=Class III chitinase homolog h; Flags: Precursor
LOC_Os08g25310	1.11933	8.65e-12	2.93e-07	yes	up	10.3467	23.8667	10.4	10.4	10.24	26.88	23.94	20.78		RecName: Full=Phosphatidylinositol/phosphatidylcholine transfer protein SFH13; AltName: Full=Protein SEC FOURTEEN HOMOLOGS 13; Short=AtSFH13
LOC_Os07g05190	1.40343	8.68e-12	2.94e-07	yes	up	9.53333	26.8	8.54	11.34	8.72	22.79	23.36	34.25		RecName: Full=Probable LRR receptor-like serine/threonine-protein kinase At4g20940
LOC_Os08g09900	1.49151	8.79e-12	2.97e-07	yes	up	1.10333	3.30333	1.05	1.25	1.01	3.25	3.49	3.17		RecName: Full=Zinc finger BED domain-containing protein DAYSLEEPER; AltName: Full=Transposase-like protein DAYSLEEPER
LOC_Os03g07570	1.28264	8.88e-12	3e-07	yes	up	28.5533	70.16	30.27	28.25	27.14	76.86	76.99	56.63		RecName: Full=Alanine--glyoxylate aminotransferase 2 homolog 1, mitochondrial; AltName: Full=Beta-alanine-pyruvate aminotransferase 1; Flags: Precursor
LOC_Os12g41930	1.24968	9.24e-12	3.12e-07	yes	up	40.87	103.723	43.64	45.24	33.73	97.17	92.76	121.24		RecName: Full=Suppressor protein SRP40
LOC_Os05g29750	2.16638	9.5e-12	3.21e-07	yes	up	0.983333	4.71	1.27	0.78	0.9	3.51	5.5	5.12		RecName: Full=Cytochrome P450 71C3; AltName: Full=Protein benzoxazineless 5
LOC_Os02g42210	1.14142	9.76e-12	3.3e-07	yes	up	8.14667	19.1667	8.3	8.86	7.28	19.86	18.54	19.1		RecName: Full=Pentatricopeptide repeat-containing protein At4g36680, mitochondrial; Flags: Precursor
LOC_Os01g53840	1.25225	1.03e-11	3.47e-07	yes	up	10.5033	26.58	10.98	9.87	10.66	29.28	28.91	21.55		RecName: Full=LysM domain receptor-like kinase 3; Short=LysM-containing receptor-like kinase 3; Flags: Precursor
LOC_Os01g57630	1.16378	1.06e-11	3.58e-07	yes	up	8.78667	21.1133	8.47	9.93	7.96	19.98	18.68	24.68		RecName: Full=Pentatricopeptide repeat-containing protein At1g55890, mitochondrial; Flags: Precursor
LOC_Os07g48360	1.1702	1.07e-11	3.62e-07	yes	up	9.91667	23.74	9.07	11.89	8.79	22.07	22.96	26.19		RecName: Full=ATP-dependent DNA helicase RecQ
LOC_Os07g33780	1.29557	1.09e-11	3.7e-07	yes	up	9.93667	23.9133	9.3	10.13	10.38	26.2	26.42	19.12		RecName: Full=Pleiotropic drug resistance protein 5
LOC_Os01g22090	1.10466	1.14e-11	3.87e-07	yes	up	8.58667	20.0233	7.5	8.53	9.73	20.98	19.62	19.47		_
LOC_Os03g60180	1.15421	1.17e-11	3.97e-07	yes	up	5.74333	13.6267	6.19	5.75	5.29	13.18	13.87	13.83		RecName: Full=Probable GTP-binding protein EngB
LOC_Os04g53720	1.27229	1.2e-11	4.05e-07	yes	up	2.47	6.35	2.66	2.45	2.3	6.38	5.59	7.08		RecName: Full=Uncharacterized ATP-dependent helicase C23E6.02
LOC_Os02g42380	1.60087	1.2e-11	4.05e-07	yes	up	3.62667	11.71	2.9	3.9	4.08	12.61	11.54	10.98		RecName: Full=Transcription factor TCP21; AltName: Full=Protein CCA1 HIKING EXPEDITION; AltName: Full=Protein CHE
LOC_Os02g09380	1.38201	1.21e-11	4.1e-07	yes	up	6.65	18.5067	5.97	7.38	6.6	18.42	15.78	21.32		_
LOC_Os07g34740	1.29617	1.21e-11	4.11e-07	yes	up	13.0233	34.1167	13.2	15.07	10.8	31.47	30.71	40.17		RecName: Full=Pre-rRNA-processing protein ESF1; AltName: Full=18S rRNA factor 1
LOC_Os03g62490	1.27085	1.22e-11	4.12e-07	yes	up	11.4067	29.4067	11.55	13.41	9.26	28.44	30	29.78		RecName: Full=Prohibitin-1, mitochondrial; Short=Atphb1
LOC_Os08g02410	1.00203	1.22e-11	4.13e-07	yes	up	242.47	518.577	224.47	220.21	282.73	542.04	513.56	500.13		RecName: Full=40S ribosomal protein S13-2
LOC_Os05g02040	1.71157	1.23e-11	4.17e-07	yes	up	2.16667	7.57667	2.13	2.79	1.58	6.46	7.06	9.21		RecName: Full=Replication protein A 70 kDa DNA-binding subunit C; Short=OsRPA70c; AltName: Full=Replication factor A protein 1C; AltName: Full=Replication protein
LOC_Os01g08700	1.09585	1.24e-11	4.18e-07	yes	up	65.7833	149.663	65.86	68.99	62.5	153.78	169.27	125.94		RecName: Full=Protein GIGANTEA
LOC_Os04g53700	1.25644	1.26e-11	4.26e-07	yes	up	6.62333	16.5733	5.52	7.96	6.39	16.6	16.76	16.36		RecName: Full=Histone-lysine N-methyltransferase ATXR2; AltName: Full=Protein SET DOMAIN GROUP 36; AltName: Full=Trithorax-related protein 2; Short=TRX-related pro
LOC_Os09g26960	1.70895	1.27e-11	4.28e-07	yes	up	28.7967	100.5	34.35	27.41	24.63	96.87	133.85	70.78		RecName: Full=Cytochrome P450 71A1; AltName: Full=ARP-2; AltName: Full=CYPLXXIA1
LOC_Os04g58590	1.32598	1.29e-11	4.35e-07	yes	up	7.63667	20.4667	8.71	8.21	5.99	19.04	22	20.36		RecName: Full=Polyadenylate-binding protein 1-like
LOC_Os02g54490	1.15451	1.35e-11	4.56e-07	yes	up	3.53333	8.37	3.36	3.86	3.38	8.33	7.69	9.09		RecName: Full=Anaphase-promoting complex subunit 4; AltName: Full=Cyclosome subunit 4
LOC_Os02g08190	1.13269	1.43e-11	4.83e-07	yes	up	8.51	19.8567	7.94	9.44	8.15	18.08	18.53	22.96		RecName: Full=Protein CYPRO4
LOC_Os04g42380	1.11166	1.43e-11	4.84e-07	yes	up	45.9633	106.05	39.39	45.64	52.86	110.36	111.02	96.77		RecName: Full=40S ribosomal protein S11
LOC_Os02g02340	2.06882	1.43e-11	4.85e-07	yes	up	0.993333	4.46333	1.26	0.81	0.91	3.65	4.58	5.16		RecName: Full=Glycerol-3-phosphate 2-O-acyltransferase 6; Short=AtGPAT6; AltName: Full=Glycerol-3-phosphate acyltransferase 6
LOC_Os03g07430	1.25406	1.53e-11	5.18e-07	yes	up	10.9267	27.7067	11.86	11.74	9.18	23.83	27.86	31.43		RecName: Full=Protein kinase 2B, chloroplastic; Flags: Precursor
LOC_Os08g35880	1.25779	1.57e-11	5.31e-07	yes	up	6.40667	16.22	4.91	7.75	6.56	17.39	16.29	14.98		_
LOC_Os09g27090	4.64294	1.59e-11	5.37e-07	yes	up	0.0666667	1.75667	0	0.09	0.11	1.24	1.75	2.28		_
LOC_Os12g36620	1.24167	1.62e-11	5.49e-07	yes	up	1.47	3.68333	1.49	1.51	1.41	3.59	3.3	4.16		RecName: Full=Pentatricopeptide repeat-containing protein At4g13650
LOC_Os07g07490	1.03869	1.65e-11	5.57e-07	yes	up	66.6267	145.823	72.14	70.15	57.59	146.88	141.85	148.74		RecName: Full=YTH domain-containing family protein 2
LOC_Os07g15460	1.44787	1.8e-11	6.1e-07	yes	up	2.10333	6.03	1.73	2.18	2.4	6.32	5.76	6.01		RecName: Full=Metal transporter Nramp1; Short=OsNramp1
LOC_Os04g52320	1.36445	1.88e-11	6.37e-07	yes	up	4.33667	11.81	3.72	3.95	5.34	12.64	12.1	10.69		RecName: Full=Polygalacturonase QRT3; Short=AtQRT3; Short=PG QRT3; AltName: Full=Pectinase QRT3; AltName: Full=Protein QUARTET 3; Flags: Precursor
LOC_Os03g10800	1.54372	1.93e-11	6.52e-07	yes	up	3.93333	12.4933	4.75	3.48	3.57	11.87	10.22	15.39		RecName: Full=BTB/POZ domain-containing protein NPY2; AltName: Full=Protein NAKED PINS IN YUC MUTANTS 2
LOC_Os04g56030	2.95971	2e-11	6.76e-07	yes	up	1.18667	9.82	1.35	0.48	1.73	10.36	11.6	7.5		RecName: Full=Glycine-rich cell wall structural protein 1; Flags: Precursor
LOC_Os01g07080	1.1632	2.07e-11	7e-07	yes	up	9.40333	22.5233	8.05	9.76	10.4	24.51	23.49	19.57		RecName: Full=DEAD-box ATP-dependent RNA helicase 18; AltName: Full=BRI1-KD-interacting protein 115; Short=BIP115
LOC_Os04g50660	1.12864	2.16e-11	7.3e-07	yes	up	10.5033	24.4367	9.93	12.31	9.27	25.23	25.3	22.78		RecName: Full=Transducin beta-like protein 3
LOC_Os03g53230	1.02988	2.18e-11	7.36e-07	yes	up	53.0367	115.323	51.58	57.55	49.98	104.63	106.9	134.44		RecName: Full=ATP-sulfurylase 3, chloroplastic; Flags: Precursor
LOC_Os05g28510	1.12508	2.18e-11	7.37e-07	yes	up	31.2433	72.6	33.01	34.9	25.82	69.82	70.62	77.36		RecName: Full=Importin subunit beta-1; AltName: Full=Importin-95; AltName: Full=Karyopherin subunit beta-1; AltName: Full=Karyopherin-95
LOC_Os02g12760	1.3289	2.21e-11	7.46e-07	yes	up	8.19667	22.17	7.3	8.63	8.66	21.24	27.02	18.25		RecName: Full=CASP-like protein Os02g0219900
LOC_Os04g28060	1.38326	2.22e-11	7.52e-07	yes	up	12.1967	34.05	9.28	13.72	13.59	38.27	30.68	33.2		RecName: Full=Protein CMSS1; AltName: Full=Cms1 ribosomal small subunit homolog
LOC_Os01g67054	1.28463	2.28e-11	7.72e-07	yes	up	41.5967	108.34	42.66	41.51	40.62	92.62	91.87	140.53		RecName: Full=Calreticulin-3; AltName: Full=Protein PRIORITY IN SWEET LIFE 1; Flags: Precursor
LOC_Os01g09260	8.37892	2.35e-11	7.96e-07	yes	up	0	1.87667	0	0	0	1.68	2.07	1.88		RecName: Full=Cytokinin dehydrogenase 1; AltName: Full=Cytokinin oxidase 1; Short=OsCKX1; Flags: Precursor
LOC_Os01g73950	1.09391	2.41e-11	8.15e-07	yes	up	12.6933	28.7867	12.21	13.76	12.11	31.09	30.34	24.93		RecName: Full=Pentatricopeptide repeat-containing protein At3g48250, chloroplastic; Flags: Precursor
LOC_Os01g47070	4.47056	2.49e-11	8.42e-07	yes	up	0.163333	3.7	0.15	0	0.34	4.16	4.85	2.09		RecName: Full=Acidic endochitinase; Flags: Precursor
LOC_Os01g02860	1.21787	2.56e-11	8.65e-07	yes	up	2.38667	5.87667	2	2.45	2.71	6.13	5.4	6.1		_
LOC_Os03g61019	1.0313	2.57e-11	8.7e-07	yes	up	46.7933	103.063	43.13	45.71	51.54	107.22	102.04	99.93		RecName: Full=Mitochondrial import inner membrane translocase subunit TIM10
LOC_Os03g10540	1.1271	2.61e-11	8.81e-07	yes	up	8.88	20.6333	8.12	9.6	8.92	19.49	18.67	23.74		_
LOC_Os02g06770	1.13667	2.61e-11	8.81e-07	yes	up	25.85	62.9033	22.3	27.09	28.16	57.77	69.16	61.78		_
LOC_Os05g49830	7.59209	2.68e-11	9.05e-07	yes	up	0.0233333	5.03	0	0.03	0.04	5.2	7.86	2.03		RecName: Full=Phospholipase A1-II 6
LOC_Os10g33720	1.16971	2.74e-11	9.27e-07	yes	up	18.3967	43.9	18.25	20.22	16.72	47.35	47.7	36.65		RecName: Full=Probable methyltransferase PMT1
LOC_Os02g02360	1.13527	2.77e-11	9.38e-07	yes	up	16.3633	38.32	16.75	18.6	13.74	39.06	36.17	39.73		RecName: Full=RNA-binding protein NOB1
LOC_Os08g28970	3.50507	2.78e-11	9.39e-07	yes	up	0.213333	2.65	0.26	0.15	0.23	2.47	3.63	1.85		_
LOC_Os05g43440	1.3006	2.88e-11	9.74e-07	yes	up	7.66	20.2367	8.51	7.02	7.45	22.18	19.42	19.11		RecName: Full=Single-stranded DNA-binding protein, mitochondrial; Flags: Precursor
LOC_Os03g03350	1.74371	2.88e-11	9.75e-07	yes	up	14.37	51.8167	19.25	13.63	10.23	56.2	56.47	42.78		RecName: Full=Probable polygalacturonase; Short=PG; AltName: Full=Pectinase
LOC_Os03g38950	1.21104	3.17e-11	1.07e-06	yes	up	14.8033	35.7533	13.38	13.2	17.83	35.49	38.64	33.13		_
LOC_Os01g37837	1.1019	3.19e-11	1.08e-06	yes	up	25.6167	58.7733	28.24	25.88	22.73	64.02	57.27	55.03		RecName: Full=Serine--tRNA ligase; AltName: Full=Seryl-tRNA synthetase; Short=SerRS; AltName: Full=Seryl-tRNA(Ser/Sec) synthetase
LOC_Os12g40560	1.00697	3.2e-11	1.08e-06	yes	up	15.55	33.63	16.58	16.04	14.03	33.64	31.5	35.75		_
LOC_Os12g04740	1.04038	3.3e-11	1.12e-06	yes	up	18.97	41.5433	16.38	20.63	19.9	44.4	41.93	38.3		_
LOC_Os04g48870	1.97161	3.33e-11	1.13e-06	yes	up	22.9	97.37	34.37	19.4	14.93	86.05	87.77	118.29		RecName: Full=Protein SPIRAL1-like 4
LOC_Os03g03650	1.06963	3.37e-11	1.14e-06	yes	up	9.07	20.2433	8.37	9.44	9.4	19.73	18.08	22.92		RecName: Full=DNA polymerase delta small subunit
LOC_Os12g36910	1.70197	3.4e-11	1.15e-06	yes	up	6.50333	22.47	5.57	7.46	6.48	24.15	28.63	14.63		_
LOC_Os05g48230	1.17106	3.55e-11	1.2e-06	yes	up	5.57	13.37	5.99	5.38	5.34	13.86	13.73	12.52		_
LOC_Os12g37410	1.08612	3.59e-11	1.22e-06	yes	up	153.783	349.623	178.14	133.16	150.05	333.08	346.31	369.48		RecName: Full=Ocs element-binding factor 1; Short=OCSBF-1
LOC_Os06g24180	2.73453	3.67e-11	1.24e-06	yes	up	0.29	2.04667	0.18	0.31	0.38	2.05	2.09	2		RecName: Full=Cytochrome P450 84A4
LOC_Os12g02540	1.81226	3.69e-11	1.25e-06	yes	up	1.3	4.85333	0.94	1.74	1.22	4.19	4.61	5.76		RecName: Full=BTB/POZ domain-containing protein At3g08570
LOC_Os06g07620	1.57374	3.75e-11	1.27e-06	yes	up	2.35667	7.45333	1.98	2.76	2.33	5.99	6.58	9.79		_
LOC_Os02g37180	4.33812	3.75e-11	1.27e-06	yes	up	0.546667	12.06	0.73	0.28	0.63	5.72	12.65	17.81		_
LOC_Os01g40860	1.2141	3.92e-11	1.33e-06	yes	up	7.31	18.0267	6.34	8.81	6.78	18.14	18.9	17.04		RecName: Full=Aldehyde dehydrogenase family 2 member C4; AltName: Full=ALDH1a; AltName: Full=Protein REDUCED EPIDERMAL FLUORESCENCE 1
LOC_Os08g06040	1.17293	4.04e-11	1.37e-06	yes	up	206.13	498.59	179.56	188.2	250.63	550.14	488.41	457.22		RecName: Full=60S ribosomal protein L34
LOC_Os05g06460	1.06849	4.04e-11	1.37e-06	yes	up	7.29667	16.2933	7.06	8.09	6.74	15.17	17.15	16.56		RecName: Full=Dihydrolipoyl dehydrogenase 1, chloroplastic; Short=ptLPD1; AltName: Full=Dihydrolipoamide dehydrogenase 1; AltName: Full=Protein LIPOAMIDE DEHYDROG
LOC_Os09g37070	1.1491	4.07e-11	1.38e-06	yes	up	4.54667	11.0567	4.37	5.21	4.06	10.83	10.98	11.36		RecName: Full=Pentatricopeptide repeat-containing protein At1g20300, mitochondrial; Flags: Precursor
LOC_Os04g40290	1.83189	4.15e-11	1.4e-06	yes	up	2.82	10.4067	2.26	3.82	2.38	9.24	8.06	13.92		RecName: Full=Pachytene checkpoint protein 2 homolog
LOC_Os09g36580	2.61859	4.2e-11	1.42e-06	yes	up	0.75	4.96333	0.89	0.93	0.43	3.12	6.32	5.45		RecName: Full=Thaumatin-like protein 1; Flags: Precursor
LOC_Os02g01550	1.19674	4.24e-11	1.43e-06	yes	up	4.13667	10.1267	3.57	4.51	4.33	9.63	10.01	10.74		_
LOC_Os12g42700	1.52735	4.33e-11	1.46e-06	yes	up	6.37	19.5267	5.41	8.12	5.58	17.25	16.37	24.96		_
LOC_Os07g37640	1.05393	4.55e-11	1.54e-06	yes	up	7.24333	15.9533	6.33	8.4	7	15.61	14.72	17.53		RecName: Full=Elongator complex protein 1; Short=AtELP1; AltName: Full=Elongator component 1; AltName: Full=Protein ABA-OVERLY SENSITIVE 1; AltName: Full=Protein EL
LOC_Os10g41660	2.15841	4.65e-11	1.57e-06	yes	up	1.24333	5.91333	1.44	0.82	1.47	4.74	5.46	7.54		RecName: Full=RING-H2 finger protein ATL64
LOC_Os03g12140	1.36121	4.79e-11	1.62e-06	yes	up	16.8667	45.93	11.9	18.57	20.13	43.73	40.72	53.34		RecName: Full=Glucan endo-1,3-beta-glucosidase 3; AltName: Full=(1-)3)-beta-glucan endohydrolase 3; Short=(1-)3)-beta-glucanase 3; AltName: Full=Beta-1,3-endoglucan
LOC_Os04g39220	1.15246	4.8e-11	1.62e-06	yes	up	6.49667	15.31	5.6	7.3	6.59	16.18	16.75	13		_
LOC_Os11g04020	8.48577	4.84e-11	1.64e-06	yes	up	0	1.58667	0	0	0	1.68	2.23	0.85		RecName: Full=Protein ZINC INDUCED FACILITATOR-LIKE 1; AltName: Full=Protein ZIF-LIKE 1
LOC_Os02g01920	1.20018	5.1e-11	1.72e-06	yes	up	11.9867	31.31	10.37	13.58	12.01	35.29	32.92	25.72		RecName: Full=Diphosphomevalonate decarboxylase; AltName: Full=Mevalonate (diphospho)decarboxylase; Short=MDDase; AltName: Full=Mevalonate pyrophosphate decarboxyl
LOC_Os03g45390	3.25203	5.26e-11	1.78e-06	yes	up	0.173333	1.76333	0.17	0.21	0.14	1.62	2.13	1.54		RecName: Full=Glucan endo-1,3-beta-glucosidase 8; AltName: Full=(1-)3)-beta-glucan endohydrolase 8; Short=(1-)3)-beta-glucanase 8; AltName: Full=Beta-1,3-endogluca
LOC_Os06g32580	1.24922	5.27e-11	1.78e-06	yes	up	4.69667	12.9	4.08	4.42	5.59	11.72	12.34	14.64		_
LOC_Os03g41120	2.24024	5.38e-11	1.82e-06	yes	up	0.86	4.32667	0.79	0.85	0.94	4.92	3.82	4.24		_
LOC_Os04g39444	1.2725	5.45e-11	1.84e-06	yes	up	17.41	54.3433	13.59	20.29	18.35	58.85	44.39	59.79		RecName: Full=Small nuclear ribonucleoprotein Sm D1; Short=Sm-D1; AltName: Full=Sm-D autoantigen; AltName: Full=snRNP core protein D1
LOC_Os11g07225	8.19808	5.6e-11	1.89e-06	yes	up	0.00333333	1.14667	0	0	0.01	1.58	1.11	0.75		RecName: Full=Probable LRR receptor-like serine/threonine-protein kinase At3g47570; Flags: Precursor
LOC_Os03g11530	1.05065	5.66e-11	1.91e-06	yes	up	12.3133	27.1067	11.63	13.48	11.83	27.93	29.32	24.07		RecName: Full=Probable inactive purple acid phosphatase 1; Flags: Precursor
LOC_Os01g18630	1.56115	5.82e-11	1.97e-06	yes	up	20.0267	56.18	19.67	24.91	15.5	57.44	55.98	55.12		RecName: Full=Aspartic proteinase; Flags: Precursor
LOC_Os11g04200	1.07326	5.94e-11	2.01e-06	yes	up	13.1767	29.55	12.19	15.42	11.92	29.03	27.64	31.98		RecName: Full=U3 small nucleolar ribonucleoprotein protein MPP10; AltName: Full=M phase phosphoprotein 10
LOC_Os10g33350	1.80748	6.11e-11	2.07e-06	yes	up	2.27333	8.63	2.07	2.51	2.24	9.9	8.65	7.34		RecName: Full=Desumoylating isopeptidase 1; Short=DeSI-1; AltName: Full=PPPDE peptidase domain-containing protein 2; AltName: Full=Protein FAM152B
LOC_Os04g50770	4.20475	6.13e-11	2.07e-06	yes	up	0.0866667	1.71	0.13	0.1	0.03	1.25	1.61	2.27		RecName: Full=Myb-related protein Zm1
LOC_Os01g51840	1.53653	6.23e-11	2.11e-06	yes	up	4.7	14.32	3.38	5.85	4.87	16.44	14.82	11.7		RecName: Full=Protein IQ-DOMAIN 31
LOC_Os12g39830	1.26292	6.38e-11	2.16e-06	yes	up	5.19	13.25	4.27	6.24	5.06	12.87	14.13	12.75		RecName: Full=Cyclin-D5-2; AltName: Full=G1/S-specific cyclin-D5-2; Short=CycD5;2
LOC_Os01g04710	1.03214	6.44e-11	2.18e-06	yes	up	41.6367	90.93	37.42	40.15	47.34	83.89	82.95	105.95		RecName: Full=Protein ASPARTIC PROTEASE IN GUARD CELL 1; Short=AtASPG1; Flags: Precursor
LOC_Os10g01100	1.09513	6.48e-11	2.19e-06	yes	up	6.13	13.9467	6.36	6.38	5.65	12.42	13.74	15.68		RecName: Full=G-type lectin S-receptor-like serine/threonine-protein kinase SD2-2; AltName: Full=Receptor-like kinase 4; AltName: Full=S-domain-2 (SD2) receptor kin
LOC_Os05g39150	1.16243	6.53e-11	2.21e-06	yes	up	9.48	22.56	8.74	10.96	8.74	24.27	23.19	20.22		_
LOC_Os07g42924	1.06202	6.6e-11	2.23e-06	yes	up	25.1	54.49	27.47	24.63	23.2	54.75	57.34	51.38		RecName: Full=Alcohol dehydrogenase-like 2
LOC_Os01g72710	1.0029	6.64e-11	2.25e-06	yes	up	7.74667	16.5267	7.59	7.96	7.69	16.58	15.65	17.35		_
LOC_Os06g47580	1.07726	6.67e-11	2.26e-06	yes	up	5.23667	11.6767	4.45	6.17	5.09	11.43	11.71	11.89		RecName: Full=DNA repair protein REV1; Short=AtREV1; AltName: Full=Rev1-like terminal deoxycytidyl transferase
LOC_Os05g08990	1.10552	6.83e-11	2.31e-06	yes	up	16.73	38.22	15.73	19.51	14.95	41.75	38.3	34.61		RecName: Full=Glutamine--tRNA ligase; AltName: Full=Glutaminyl-tRNA synthetase; Short=GlnRS
LOC_Os06g07200	2.33836	6.94e-11	2.35e-06	yes	up	0.786667	4.21667	0.58	0.93	0.85	4.72	4.57	3.36		RecName: Full=Syntaxin-132; Short=AtSYP132
LOC_Os08g06100	1.7767	7.21e-11	2.44e-06	yes	up	27.0067	99.6467	35.18	24.12	21.72	65.22	106.53	127.19		RecName: Full=Flavone 3'-O-methyltransferase 1; Short=OsOMT1; AltName: Full=Quercetin 3'-O-methyltransferase 1; Flags: Precursor
LOC_Os01g04080	1.2743	7.73e-11	2.61e-06	yes	up	11.93	30.97	13.21	11.04	11.54	27	29.19	36.72		_
LOC_Os11g05730	2.57919	7.87e-11	2.66e-06	yes	up	12.6	82.1033	7.54	18.14	12.12	56.18	49.4	140.73		RecName: Full=Histone H3.2; AltName: Full=Histone H3.1
LOC_Os03g29930	1.8717	8.13e-11	2.75e-06	yes	up	15.7433	61.2167	13.74	15.6	17.89	56.74	88.99	37.92		_
LOC_Os01g47290	8.25831	8.16e-11	2.76e-06	yes	up	0	3.47667	0	0	0	2.62	3.29	4.52		_
LOC_Os02g04660	1.14058	9.03e-11	3.05e-06	yes	up	17.5333	39.85	16.28	18.62	17.7	42.28	44.5	32.77		RecName: Full=Protein arginine N-methyltransferase 5; AltName: Full=Shk1 kinase-binding protein 1 homolog
LOC_Os03g14530	1.01133	9.14e-11	3.09e-06	yes	up	38.75	83.9467	34.82	38.93	42.5	79.65	77.67	94.52		RecName: Full=40S ribosomal protein S20-1
LOC_Os09g38400	1.02413	9.3e-11	3.15e-06	yes	up	81.88	180.23	65.45	92.35	87.84	175.68	178.52	186.49		RecName: Full=Phosphopantothenoylcysteine decarboxylase subunit VHS3; AltName: Full=Viable in a HAL3 SIT4 background protein 3
LOC_Os08g43040	1.00636	9.63e-11	3.26e-06	yes	up	28.73	61.4733	29.96	30.62	25.61	65.48	60.81	58.13		RecName: Full=Rosmarinate synthase; Short=CbRAS; AltName: Full=Hydroxycinnamoyl transferase; Short=CbHCT1
LOC_Os06g03790	1.06515	9.78e-11	3.31e-06	yes	up	26.83	59.9533	25.34	25.42	29.73	66.03	58.39	55.44		RecName: Full=39S ribosomal protein L47, mitochondrial; Short=L47mt; Short=MRP-L47; Flags: Precursor
LOC_Os10g39140	1.13447	9.81e-11	3.32e-06	yes	up	39.1967	92.89	36.62	45.43	35.54	75.94	101.03	101.7		RecName: Full=Flavonol synthase/flavanone 3-hydroxylase; Short=FLS
LOC_Os05g48050	1.34547	1.03e-10	3.47e-06	yes	up	8.00333	21.6133	6.79	7.92	9.3	22.9	23.76	18.18		RecName: Full=50S ribosomal protein L7/L12
LOC_Os01g11920	1.18615	1.04e-10	3.53e-06	yes	up	2.08667	5.05333	2.15	2.16	1.95	5.05	5.1	5.01		RecName: Full=Inactive TPR repeat-containing thioredoxin TTL3; AltName: Full=Tetratricopeptide repeat thioredoxin-like 3; AltName: Full=VH1-interacting TPR-containi
LOC_Os07g10420	1.04811	1.04e-10	3.53e-06	yes	up	29.4767	66.3567	32.57	29.76	26.1	64.96	69.3	64.81		_
LOC_Os11g11340	1.08292	1.06e-10	3.58e-06	yes	up	4.01	9.03333	3.59	4.58	3.86	9.16	8.45	9.49		RecName: Full=Calmodulin-interacting protein 111; Short=CaM-interacting protein 111; AltName: Full=ATPase family AAA domain-containing protein CIP111
LOC_Os07g38540	1.04854	1.14e-10	3.84e-06	yes	up	36.3467	80.3433	33.01	32.63	43.4	78.92	79.51	82.6		RecName: Full=40S ribosomal protein S13-2
LOC_Os01g58480	2.90916	1.14e-10	3.85e-06	yes	up	0.803333	6.46333	0.78	0.67	0.96	5.76	6.93	6.7		_
LOC_Os03g60730	1.15388	1.14e-10	3.86e-06	yes	up	3.14	7.52333	2.87	3.58	2.97	7.53	7.94	7.1		RecName: Full=Zinc finger BED domain-containing protein RICESLEEPER 2; AltName: Full=Transposase-like protein RICESLEEPER 2
LOC_Os06g35060	8.17797	1.18e-10	3.99e-06	yes	up	0	2.71667	0	0	0	2.11	2.83	3.21		_
LOC_Os04g47380	1.18403	1.2e-10	4.04e-06	yes	up	6.04	14.6467	6.08	6.89	5.15	15.05	15.19	13.7		RecName: Full=Putative tRNA pseudouridine synthase Pus10; AltName: Full=Coiled-coil domain-containing protein 139; AltName: Full=tRNA pseudouridine 55 synthase; S
LOC_Os10g39100	3.75598	1.22e-10	4.11e-06	yes	up	0.153333	2.18667	0.1	0.13	0.23	1.76	2.02	2.78		_
LOC_Os07g42520	1.23875	1.22e-10	4.13e-06	yes	up	16.74	42.4633	16.93	16.23	17.06	33.73	44.53	49.13		_
LOC_Os12g36830	4.86035	1.23e-10	4.16e-06	yes	up	0.13	3.86333	0.06	0	0.33	4.19	3.97	3.43		_
LOC_Os09g21520	1.27189	1.23e-10	4.18e-06	yes	up	8.07667	20.1633	8.4	9.37	6.46	20.23	18.65	21.61		RecName: Full=DEAD-box ATP-dependent RNA helicase 22
LOC_Os04g52190	5.15385	1.24e-10	4.21e-06	yes	up	0.03	0.956667	0.02	0.02	0.05	0.84	1.33	0.7		RecName: Full=Vacuolar-sorting receptor 7; Short=AtVSR7; AltName: Full=BP80-like protein f; Short=AtBP80f; AltName: Full=Epidermal growth factor receptor-like prote
LOC_Os04g33050	1.65587	1.28e-10	4.34e-06	yes	up	1.96333	7.14667	1.39	2.3	2.2	6.44	5.97	9.03		_
LOC_Os01g14790	1.01676	1.3e-10	4.4e-06	yes	up	31.4867	68.58	28.86	29.57	36.03	70.59	68.88	66.27		_
LOC_Os01g40250	1.07743	1.31e-10	4.42e-06	yes	up	8.37333	18.3067	8.21	8.99	7.92	20.45	18.34	16.13		RecName: Full=U3 small nucleolar RNA-associated protein 20; Short=U3 snoRNA-associated protein 20
LOC_Os09g10010	2.96007	1.37e-10	4.62e-06	yes	up	0.98	8.20333	0.99	0.74	1.21	8.97	7.98	7.66		_
LOC_Os04g53950	1.34372	1.39e-10	4.71e-06	yes	up	60.2067	162.34	44.77	72.06	63.79	142.74	142.89	201.39		RecName: Full=Probable xyloglucan endotransglucosylase/hydrolase protein; Flags: Precursor
LOC_Os04g46250	5.1373	1.4e-10	4.73e-06	yes	up	0.0566667	2.02	0.06	0	0.11	1.82	1.5	2.74		RecName: Full=Ethylene-responsive transcription factor 5; Short=AtERF5; AltName: Full=Ethylene-responsive element-binding factor 5; Short=EREBP-5
LOC_Os05g39160	1.70057	1.43e-10	4.82e-06	yes	up	2.58333	17.76	2.29	3.48	1.98	8.34	36.72	8.22		_
LOC_Os03g11690	1.39502	1.46e-10	4.94e-06	yes	up	2.72333	7.57667	2.08	2.78	3.31	8.11	7.83	6.79		RecName: Full=Pentatricopeptide repeat-containing protein At1g62590
LOC_Os03g03930	1.17519	1.47e-10	4.99e-06	yes	up	6.37333	15.21	5.03	7.58	6.51	15.08	14.74	15.81		RecName: Full=Poly(A) polymerase I; Short=PAP I
LOC_Os02g40490	1.04547	1.49e-10	5.04e-06	yes	up	23.9033	52.9667	23.41	23.57	24.73	51.81	46.94	60.15		RecName: Full=39S ribosomal protein L41-A, mitochondrial; Short=L41mt-A; Short=MRP-L41-A; Flags: Precursor
LOC_Os10g17650	3.02678	1.54e-10	5.2e-06	yes	up	0.313333	2.75667	0.57	0.21	0.16	3.12	2.65	2.5		RecName: Full=Beta-glucosidase 34; Short=Os10bglu34; Flags: Precursor
LOC_Os10g03750	1.93627	1.54e-10	5.2e-06	yes	up	1.58	6.47333	1.35	2.24	1.15	5.67	5.83	7.92		RecName: Full=FBD-associated F-box protein At5g18780
LOC_Os07g35370	1.63836	1.55e-10	5.23e-06	yes	up	3.88667	12.9333	4.53	4.45	2.68	13.03	14.99	10.78		RecName: Full=Cysteine-rich receptor-like protein kinase 6; Short=Cysteine-rich RLK6; AltName: Full=Receptor-like protein kinase 5; Flags: Precursor
LOC_Os03g43540	1.68777	1.56e-10	5.28e-06	yes	up	2.86667	7.60667	2.6	2.07	3.93	7.67	6.94	8.21		_
LOC_Os06g22030	1.38811	1.58e-10	5.35e-06	yes	up	2.19	6.06333	1.93	2.03	2.61	5.68	6.74	5.77		_
LOC_Os11g37080	1.18952	1.73e-10	5.84e-06	yes	up	74.7733	181.07	59	76.82	88.5	207.12	166.39	169.7		RecName: Full=Putative H/ACA ribonucleoprotein complex subunit 1-like protein 1
LOC_Os03g61270	3.64081	1.76e-10	5.94e-06	yes	up	0.286667	3.96333	0.64	0.16	0.06	3.62	4.62	3.65		RecName: Full=Mannan endo-1,4-beta-mannosidase 3; AltName: Full=Beta-mannanase 3; AltName: Full=Endo-beta-1,4-mannanase 3; AltName: Full=OsMAN3; Flags: Precursor
LOC_Os05g28280	1.16357	1.77e-10	6e-06	yes	up	68.5433	163.857	71.98	79.84	53.81	167.2	159.11	165.26		RecName: Full=Proliferation-associated protein 2G4; AltName: Full=Cell cycle protein p38-2G4 homolog; Short=hG4-1; AltName: Full=ErbB3-binding protein 1
LOC_Os06g09660	1.09662	1.8e-10	6.1e-06	yes	up	10.9433	25.4233	11.38	12.83	8.62	24.75	23.93	27.59		RecName: Full=Auxin response factor 16
LOC_Os09g14610	1.01062	1.86e-10	6.28e-06	yes	up	20.0067	39.7867	16.5	22.57	20.95	35.78	38.73	44.85		RecName: Full=Endoribonuclease Dicer homolog 2b; AltName: Full=Dicer-like protein 2b; Short=OsDCL2b
LOC_Os08g10300	2.22212	1.89e-10	6.4e-06	yes	up	0.32	1.59	0.32	0.33	0.31	1.54	2.04	1.19		RecName: Full=Probable LRR receptor-like serine/threonine-protein kinase At1g56140; Flags: Precursor
LOC_Os03g02200	1.01986	1.91e-10	6.47e-06	yes	up	16.59	35.8433	14.72	19.24	15.81	34.53	35.15	37.85		RecName: Full=Thymidine kinase
LOC_Os10g30850	1.89628	1.92e-10	6.48e-06	yes	up	6.17333	24.02	4.45	7.36	6.71	25.36	31.01	15.69		_
LOC_Os12g12080	5.7397	1.93e-10	6.54e-06	yes	up	0.0466667	4.10333	0.02	0.12	0	2.66	2.23	7.42		_
LOC_Os07g10030	1.28093	1.97e-10	6.67e-06	yes	up	7.11667	18.46	6.24	9.03	6.08	17.4	18.08	19.9		_
LOC_Os02g47370	3.27892	2.01e-10	6.79e-06	yes	up	1.39333	14.4367	0.54	1.04	2.6	9.42	19.89	14		_
LOC_Os09g32510	1.15572	2.08e-10	7.02e-06	yes	up	20.98	49.7467	21.88	20.59	20.47	52.67	56.24	40.33		RecName: Full=Transcription factor bHLH62; AltName: Full=Basic helix-loop-helix protein 62; Short=AtbHLH62; Short=bHLH 62; AltName: Full=Transcription factor EN 85
LOC_Os02g58170	1.83589	2.09e-10	7.07e-06	yes	up	7.92	30.3167	11.71	5.59	6.46	33.49	32.05	25.41		RecName: Full=Putative AC transposase; AltName: Full=ORFA
LOC_Os09g10340	6.37464	2.14e-10	7.23e-06	yes	up	0.0233333	2.07333	0.05	0.02	0	0.75	3.03	2.44		RecName: Full=Premnaspirodiene oxygenase; Short=HPO; AltName: Full=Cytochrome P450 71D55
LOC_Os11g24630	1.63921	2.15e-10	7.27e-06	yes	up	7.59333	25.0633	5.01	8.72	9.05	26.48	20.6	28.11		RecName: Full=Magnesium-dependent phosphatase 1; Short=MDP-1
LOC_Os07g46620	1.01632	2.22e-10	7.49e-06	yes	up	8.61333	18.6	8.81	8.62	8.41	17.81	17.76	20.23		RecName: Full=WD repeat-containing protein 55 homolog
LOC_Os02g04230	1.55011	2.27e-10	7.69e-06	yes	up	1.58	4.92333	1.34	1.47	1.93	4.38	5.33	5.06		RecName: Full=Mitogen-activated protein kinase 13; Short=MAP kinase 13; AltName: Full=Benzothiadiazole-induced MAP kinase 2; AltName: Full=MAP kinase 2; AltName:
LOC_Os11g02730	2.30722	2.3e-10	7.77e-06	yes	up	2.35	12.5167	3.29	1.86	1.9	9.89	8.7	18.96		_
LOC_Os09g31450	2.80599	2.31e-10	7.8e-06	yes	up	0.71	5.30333	0.81	0.55	0.77	5.08	7.69	3.14		RecName: Full=Polygalacturonase inhibitor 1; AltName: Full=Floral organ regulator 1; AltName: Full=Polygalacturonase-inhibiting protein 1; Short=PGIP-1; Flags: Pre
LOC_Os01g69290	1.06629	2.37e-10	8.02e-06	yes	up	16.8633	37.48	13.86	17.38	19.35	33.5	36.74	42.2		_
LOC_Os03g08470	1.19324	2.54e-10	8.6e-06	yes	up	179.883	440.893	220.98	166.4	152.27	430.37	419.24	473.07		RecName: Full=Ethylene-responsive transcription factor 1; AltName: Full=Ethylene-responsive element-binding factor 1; Short=EREBP-1; Short=OsEREBP1
LOC_Os01g13780	4.01827	2.57e-10	8.71e-06	yes	up	0.2	3.4	0.11	0.19	0.3	3.89	4.87	1.44		_
LOC_Os06g09310	1.98744	2.68e-10	9.05e-06	yes	up	10.8967	45.9533	10.17	9.39	13.13	29.86	73.16	34.84		RecName: Full=RING-H2 finger protein ATL60
LOC_Os08g33680	1.14648	2.72e-10	9.2e-06	yes	up	10.92	25.6633	10.75	10.86	11.15	25.65	21.93	29.41		_
LOC_Os04g37600	1.16597	2.77e-10	9.37e-06	yes	up	11.7433	27.86	10.45	11.49	13.29	31.64	28.76	23.18		RecName: Full=Mitochondrial phosphate carrier protein 3, mitochondrial; AltName: Full=Mitochondrial phosphate transporter 3; Short=MPT3; AltName: Full=Phosphate tr
LOC_Os08g32390	2.05117	2.79e-10	9.42e-06	yes	up	2.47333	10.1033	1.91	1.98	3.53	8.83	9.29	12.19		_
LOC_Os07g42910	1.58952	2.81e-10	9.52e-06	yes	up	7.52333	24.3767	10.01	6.19	6.37	25	24.48	23.65		RecName: Full=Cytochrome c oxidase subunit 6b-1; Short=AtCOX6b-1
LOC_Os09g16520	3.16322	2.82e-10	9.54e-06	yes	up	0.586667	5.58	0.17	0.71	0.88	4.88	4.59	7.27		RecName: Full=Delta(5) fatty acid desaturase A; Short=Delta-5 fatty acid desaturase A
LOC_Os03g44660	1.07209	2.84e-10	9.59e-06	yes	up	8.86333	19.84	8.12	9	9.47	21.93	18.89	18.7		RecName: Full=Cytosolic 5'-nucleotidase 3A; AltName: Full=Cytosolic 5'-nucleotidase 3; AltName: Full=Cytosolic 5'-nucleotidase III; Short=cN-III; AltName: Full=Py
LOC_Os10g25060	4.71412	2.88e-10	9.74e-06	yes	up	0.11	3.04	0.16	0.06	0.11	3.9	4.38	0.84		_
LOC_Os06g03920	1.39997	2.9e-10	9.82e-06	yes	up	6.83667	19.2933	6.14	8.46	5.91	20.45	18.99	18.44		_
LOC_Os06g14370	1.37702	2.91e-10	9.85e-06	yes	up	71.1833	218.143	74.99	83.44	55.12	241.5	234.88	178.05		RecName: Full=Probable peroxygenase 4; Short=AtPXG4; AltName: Full=Caleosin-4
LOC_Os07g23900	1.10904	3.01e-10	1.02e-05	yes	up	4.44667	10.1867	3.79	4.82	4.73	9.98	10.11	10.47		_
LOC_Os06g15480	1.45146	3.06e-10	1.03e-05	yes	up	11.4833	33.9533	9.89	9.32	15.24	28.99	31.84	41.03		RecName: Full=Transcription factor PERIANTHIA; AltName: Full=bZIP transcription factor 46; Short=AtbZIP46
LOC_Os08g40590	1.03885	3.09e-10	1.05e-05	yes	up	18.14	39.03	14.96	20.55	18.91	37.76	42.46	36.87		RecName: Full=Oxysterol-binding protein-related protein 4B; AltName: Full=OSBP-related protein 4B
LOC_Os12g41680	2.14136	3.2e-10	1.08e-05	yes	up	1.62	7.68667	2.46	1.41	0.99	7.25	7.64	8.17		RecName: Full=NAC domain-containing protein 21/22; Short=ANAC021/ANAC022
LOC_Os04g43140	1.05019	3.22e-10	1.09e-05	yes	up	12.9333	28.4833	12.17	14.87	11.76	27	26	32.45		RecName: Full=DEAD-box ATP-dependent RNA helicase 13 RH13_ORYSJ RecName: Full=DEAD-box ATP-dependent RNA helicase 13
LOC_Os01g06660	1.65074	3.46e-10	1.17e-05	yes	up	0.936667	3.13	0.87	1.01	0.93	2.92	2.95	3.52		RecName: Full=Pyruvate decarboxylase 1; Short=PDC
LOC_Os08g07290	1.15379	3.47e-10	1.18e-05	yes	up	4.40667	10.1167	4.51	4.9	3.81	10.98	9.54	9.83		_
LOC_Os03g59480	1.4652	3.61e-10	1.22e-05	yes	up	6.92333	19.9467	5.42	9.19	6.16	19.85	16.22	23.77		RecName: Full=Leucine-rich repeat extensin-like protein 3; Short=AtLRX3; Short=LRR/EXTENSIN3; AltName: Full=Cell wall hydroxyproline-rich glycoprotein; Flags: Precu
LOC_Os03g05270	1.9356	3.85e-10	1.3e-05	yes	up	1.19333	4.94333	0.91	1.66	1.01	4.82	5.39	4.62		RecName: Full=RING finger and CHY zinc finger domain-containing protein 1; AltName: Full=Androgen receptor N-terminal-interacting protein; AltName: Full=CH-rich-in
LOC_Os06g12990	1.10981	4.2e-10	1.42e-05	yes	up	9.87333	22.6967	8.77	10.54	10.31	22.92	24.18	20.99		RecName: Full=tRNA (guanine-N(7)-)-methyltransferase; AltName: Full=tRNA (guanine(46)-N(7))-methyltransferase; AltName: Full=tRNA(m7G46)-methyltransferase
LOC_Os06g17070	6.43569	4.26e-10	1.44e-05	yes	up	0.12	11.21	0.3	0.03	0.03	12.57	10.44	10.62		_
LOC_Os03g46600	1.26992	4.26e-10	1.44e-05	yes	up	29.83	76.94	21.87	31.76	35.86	76.98	66.51	87.33		RecName: Full=Acidic leucine-rich nuclear phosphoprotein 32-related protein 2; AltName: Full=ANP32/acidic nuclear phosphoprotein-like protein 2
LOC_Os06g31210	1.01718	4.33e-10	1.46e-05	yes	up	29.8433	64.3333	32.3	31.49	25.74	66.42	66.72	59.86		RecName: Full=Probable methionine--tRNA ligase; AltName: Full=Methionyl-tRNA synthetase; Short=MetRS
LOC_Os09g37060	1.59668	4.41e-10	1.49e-05	yes	up	8.2	26.4267	6.45	9.97	8.18	20.37	22.42	36.49		RecName: Full=Serine/threonine protein phosphatase 2A 57 kDa regulatory subunit B' alpha isoform; Short=AtB' alpha; Short=PP2A, B' subunit, alpha isoform
LOC_Os01g14980	1.24248	4.57e-10	1.55e-05	yes	up	35.6067	90.4033	28.9	39.34	38.58	79.2	78.97	113.04		RecName: Full=Replication protein A 14 kDa subunit; Short=OsRPA14; AltName: Full=Replication factor A protein 3; AltName: Full=Replication protein A 3
LOC_Os06g14620	1.4913	4.6e-10	1.56e-05	yes	up	48.85	146.92	40.72	61.62	44.21	124.85	116.21	199.7		RecName: Full=Ribonucleoside-diphosphate reductase small chain; AltName: Full=Ribonucleoside-diphosphate reductase R2 subunit; AltName: Full=Ribonucleotide reductase
LOC_Os02g46650	1.38175	4.8e-10	1.62e-05	yes	up	6.4	17.7367	4.95	7.02	7.23	16.3	14.21	22.7		RecName: Full=Ubiquitin carboxyl-terminal hydrolase 36; AltName: Full=Deubiquitinating enzyme 36; AltName: Full=Ubiquitin thioesterase 36; AltName: Full=Ubiquitin
LOC_Os02g07820	1.48125	4.99e-10	1.69e-05	yes	up	4.99	14.76	3.74	4.97	6.26	14.47	17.38	12.43		_
LOC_Os02g37160	5.37813	5.03e-10	1.7e-05	yes	up	0.0633333	2.96667	0.19	0	0	1.63	2.74	4.53		_
LOC_Os07g25960	4.72918	5.24e-10	1.77e-05	yes	up	0.103333	3.03333	0.27	0.04	0	3.18	2.01	3.91		_
LOC_Os03g38010	1.54575	5.28e-10	1.78e-05	yes	up	10.76	33.2233	7.59	15.09	9.6	30.21	30.15	39.31		_
LOC_Os12g44160	1.63841	5.31e-10	1.79e-05	yes	up	1.96	6.55333	1.74	2.05	2.09	6.8	7.79	5.07		_
LOC_Os03g29460	1.04634	5.38e-10	1.82e-05	yes	up	509.267	1126.18	438.69	470.37	618.74	1213.09	1015.58	1149.88		RecName: Full=60S ribosomal protein L27a-3
LOC_Os09g02360	1.82034	5.62e-10	1.9e-05	yes	up	2.25667	8.48	1.85	2.62	2.3	7.51	6.05	11.88		RecName: Full=Cyclin-D3-2; AltName: Full=G1/S-specific cyclin-D3-2; Short=CycD3;2
LOC_Os11g38650	1.59716	5.63e-10	1.9e-05	yes	up	19.8367	64.5567	27.07	17.17	15.27	52.35	62.01	79.31		RecName: Full=UDP-glycosyltransferase 72B3
LOC_Os01g48060	1.40693	5.63e-10	1.9e-05	yes	up	10.31	29.1033	9.63	11.48	9.82	36.9	29.53	20.88		RecName: Full=Auxin response factor 2; AltName: Full=ETTIN-like protein 2; AltName: Full=OsETTIN2
LOC_Os11g34160	1.01399	5.9e-10	2e-05	yes	up	5.57667	12	4.75	5.86	6.12	12.23	12.45	11.32		RecName: Full=Protein ROOT PRIMORDIUM DEFECTIVE 1
LOC_Os11g01220	1.01963	5.95e-10	2.01e-05	yes	up	6.96333	12.59	6.97	7.94	5.98	12.06	13.28	12.43		_
LOC_Os03g02110	1.02046	5.95e-10	2.01e-05	yes	up	7.56333	16.2767	7.28	8.16	7.25	17.28	17.71	13.84		_
LOC_Os11g47550	6.89682	6.29e-10	2.13e-05	yes	up	0.03	3.63333	0	0	0.09	2.51	3.1	5.29		RecName: Full=Xylanase inhibitor protein 2; AltName: Full=Class III chitinase homolog h; Flags: Precursor
LOC_Os02g51280	1.05756	6.43e-10	2.18e-05	yes	up	12.18	26.8633	9.89	13.02	13.63	24.6	25.23	30.76		RecName: Full=Transcription factor TCP15
LOC_Os01g07560	1.36646	7.4e-10	2.5e-05	yes	up	1.85	5.09333	2.18	1.86	1.51	5.62	5.04	4.62		RecName: Full=Probable LRR receptor-like serine/threonine-protein kinase At4g26540; Flags: Precursor
LOC_Os04g52640	1.04161	7.51e-10	2.54e-05	yes	up	3.07667	6.77	2.92	2.78	3.53	6.27	6.7	7.34		RecName: Full=Probable LRR receptor-like serine/threonine-protein kinase At1g56130; Flags: Precursor
LOC_Os06g07896	1.75884	7.86e-10	2.66e-05	yes	up	1.52667	5.51667	1.29	1.5	1.79	4.67	4.71	7.17		RecName: Full=30S ribosomal protein S15
LOC_Os02g56600	1.39381	7.87e-10	2.66e-05	yes	up	3.28333	9.22	3.87	2.91	3.07	8.11	10.75	8.8		RecName: Full=NAC transcription factor NAM-1; Short=HvNAM-1
LOC_Os02g33670	4.15056	8.21e-10	2.78e-05	yes	up	0.0966667	1.86667	0.13	0.09	0.07	1.23	1.78	2.59		_
LOC_Os10g34580	1.18184	8.41e-10	2.85e-05	yes	up	4.29333	10.34	3.7	4.26	4.92	11.04	8.96	11.02		_
LOC_Os01g03940	1.75091	8.45e-10	2.86e-05	yes	up	14.78	53.17	14.96	9.3	20.08	48.86	41.68	68.97		_
LOC_Os09g16330	1.13842	8.55e-10	2.89e-05	yes	up	6.67667	12.7933	6.81	5.57	7.65	10.79	14.41	13.18		RecName: Full=Probable pleiotropic drug resistance protein 2
LOC_Os11g47800	1.16426	8.78e-10	2.97e-05	yes	up	3.46667	8.27667	3.65	3.25	3.5	8.51	7.83	8.49		RecName: Full=Probable GTP-binding protein OBGM, mitochondrial; Flags: Precursor
LOC_Os01g60780	1.87448	8.79e-10	2.97e-05	yes	up	2.50333	9.88	1.47	2.9	3.14	11.22	10.98	7.44		RecName: Full=Uncharacterized membrane protein At1g06890
LOC_Os12g10180	1.24238	9.16e-10	3.1e-05	yes	up	1.06667	2.64	0.95	0.98	1.27	2.65	2.62	2.65		RecName: Full=Putative disease resistance protein RGA4; AltName: Full=RGA4-blb
LOC_Os07g03810	1.99793	9.5e-10	3.21e-05	yes	up	1.63333	4.92	1.49	1.83	1.58	3.78	4.16	6.82		RecName: Full=L-type lectin-domain containing receptor kinase IV.1; Short=Arabidopsis thaliana lectin-receptor kinase e; Short=AthlecRK-e; Short=LecRK-IV.1; AltNam
LOC_Os01g53040	2.25551	9.8e-10	3.31e-05	yes	up	0.406667	2.05	0.37	0.41	0.44	2.08	2.02	2.05		RecName: Full=Probable WRKY transcription factor 65; AltName: Full=WRKY DNA-binding protein 65
LOC_Os08g27170	3.07165	1e-09	3.39e-05	yes	up	0.576667	5.07333	0.52	0.2	1.01	6.61	5.62	2.99		_
LOC_Os02g52370	1.02108	1.01e-09	3.41e-05	yes	up	9.02667	19.3567	7.68	9.28	10.12	19.52	20.36	18.19		RecName: Full=Armadillo repeat-containing protein 6
LOC_Os07g09010	1.28816	1.01e-09	3.41e-05	yes	up	13.8167	35.9167	12.65	14.02	14.78	26.05	35.32	46.38		_
LOC_Os02g03900	4.33835	1.01e-09	3.42e-05	yes	up	0.0533333	1.2	0.02	0.09	0.05	1.2	1.2	1.2		RecName: Full=Metal transporter NRAT1; AltName: Full=Protein NRAMP ALUMINUM TRANSPORTER 1
LOC_Os01g18140	2.35464	1.01e-09	3.43e-05	yes	up	0.683333	3.59	0.77	0.83	0.45	5.05	3.03	2.69		_
LOC_Os12g39630	1.77441	1.03e-09	3.47e-05	yes	up	12.4867	45.73	13.21	12.32	11.93	52.63	59.73	24.83		RecName: Full=Serine/threonine-protein kinase SAPK9; AltName: Full=Osmotic stress/abscisic acid-activated protein kinase 9
LOC_Os10g21660	1.25117	1.03e-09	3.47e-05	yes	up	3.20333	8.00333	2.26	3.61	3.74	8.04	7.83	8.14		_
LOC_Os08g39270	1.25552	1.03e-09	3.48e-05	yes	up	28.6933	72.6733	22.4	25.33	38.35	75.64	68.87	73.51		RecName: Full=Fasciclin-like arabinogalactan protein 7; Flags: Precursor
LOC_Os12g03540	1.07755	1.05e-09	3.56e-05	yes	up	16.0633	36.4667	16.15	17.92	14.12	40.99	35.8	32.61		_
LOC_Os07g23244	1.07101	1.09e-09	3.7e-05	yes	up	20.84	46.5233	16.12	23.24	23.16	46.82	47.18	45.57		_
LOC_Os03g02750	1.31161	1.14e-09	3.84e-05	yes	up	236.563	627.997	306.88	188.85	213.96	627.71	676.93	579.35		RecName: Full=Subtilisin-like protease; AltName: Full=Cucumisin-like serine protease; Flags: Precursor
LOC_Os05g38880	7.90296	1.14e-09	3.86e-05	yes	up	0	6	0	0	0	5.04	8.18	4.78		_
LOC_Os03g02840	1.28388	1.15e-09	3.9e-05	yes	up	2.80333	7.24	2.92	2.86	2.63	6.41	8.07	7.24		_
LOC_Os05g15470	7.92763	1.16e-09	3.92e-05	yes	up	0	8.37	0	0	0	5.99	6.57	12.55		RecName: Full=Retrovirus-related Pol polyprotein from transposon 17.6; Includes: RecName: Full=Protease; Includes: RecName: Full=Reverse transcriptase; Includes: RecN
LOC_Os04g54960	1.70533	1.21e-09	4.1e-05	yes	up	2.17333	7.58333	2.3	1.99	2.23	7.05	7.57	8.13		_
LOC_Os08g27720	3.13538	1.27e-09	4.28e-05	yes	up	0.566667	5.4	1.16	0.2	0.34	5.64	5.3	5.26		RecName: Full=Pirin-like protein
LOC_Os03g38940	1.22759	1.3e-09	4.4e-05	yes	up	3.65333	8.97667	3.09	3.51	4.36	9.54	8.18	9.21		_
LOC_Os11g46000	8.50346	1.36e-09	4.6e-05	yes	up	0.04	14.2367	0	0.02	0.1	4.32	6.87	31.52		_
LOC_Os03g61700	1.70121	1.42e-09	4.8e-05	yes	up	1.49333	5.14333	1.29	1.7	1.49	4.38	4.03	7.02		_
LOC_Os09g39430	1.40447	1.46e-09	4.93e-05	yes	up	17.2333	48.4167	12.23	18.94	20.53	40.08	42.91	62.26		RecName: Full=GDSL esterase/lipase At5g03610; AltName: Full=Extracellular lipase At5g03610; Flags: Precursor
LOC_Os04g46920	1.31282	1.48e-09	5e-05	yes	up	9.43	25.5	8.27	10.63	9.39	28.64	27.98	19.88		RecName: Full=Uncharacterized protein C683.02c
LOC_Os05g43920	1.17358	1.5e-09	5.06e-05	yes	up	2.85667	6.77667	2.64	3.16	2.77	6.6	5.88	7.85		RecName: Full=Auxin response factor 14
LOC_Os02g44300	2.1531	1.52e-09	5.15e-05	yes	up	0.803333	3.95	0.91	1	0.5	3.41	4.22	4.22		RecName: Full=Vesicle-associated protein 1-3; AltName: Full=Plant VAP homolog 13; Short=AtPVA13; AltName: Full=VAMP-associated protein 1-3; Contains: RecName: Full
LOC_Os10g38780	2.41725	1.56e-09	5.26e-05	yes	up	1.28667	7.23667	0.7	1.12	2.04	5.02	9.32	7.37		RecName: Full=Probable glutathione S-transferase GSTU6; AltName: Full=28 kDa cold-induced protein
LOC_Os05g49860	1.82531	1.58e-09	5.36e-05	yes	up	59.25	226.487	47.85	79.33	50.57	170.41	157.95	351.1		RecName: Full=Histone H2B.9
LOC_Os02g51490	1.17963	1.64e-09	5.56e-05	yes	up	5.5	13.5333	5.43	6.38	4.69	12.57	14.85	13.18		RecName: Full=Alkylated DNA repair protein alkB homolog 8; AltName: Full=Probable alpha-ketoglutarate-dependent dioxygenase ABH8; AltName: Full=S-adenosyl-L-methi
LOC_Os02g13510	2.35029	1.66e-09	5.6e-05	yes	up	1.18333	6.47667	1.5	0.96	1.09	3.75	4.37	11.31		RecName: Full=Receptor protein kinase CLAVATA1; Flags: Precursor
LOC_Os09g06770	4.01219	1.66e-09	5.6e-05	yes	up	0.46	7.94333	0.85	0.25	0.28	9.16	11.54	3.13		RecName: Full=Uncharacterized RING finger protein P32A8.03c
LOC_Os07g10630	1.00577	1.72e-09	5.82e-05	yes	up	3.73333	7.97333	3.63	4.18	3.39	7.58	7.79	8.55		RecName: Full=Leucine-rich repeat receptor-like tyrosine-protein kinase At2g41820; Flags: Precursor
LOC_Os03g15840	1.25417	1.81e-09	6.13e-05	yes	up	5.83	14.7767	5.56	6.39	5.54	15.96	16.78	11.59		RecName: Full=GDP-mannose-dependent alpha-mannosyltransferase; AltName: Full=Guanosine diphosphomannose-dependent alpha-mannosyltransferase
LOC_Os01g62880	1.44958	1.81e-09	6.14e-05	yes	up	2.78667	8.08333	2.57	3.23	2.56	7.96	9.41	6.88		RecName: Full=Aldo-keto reductase family 4 member C11
LOC_Os04g55500	1.03332	1.82e-09	6.15e-05	yes	up	12.1067	26.25	9.7	14.49	12.13	26.98	25.7	26.07		RecName: Full=Crossover junction endonuclease EME1; AltName: Full=Essential meiotic endonuclease 1; Short=OsEME1
LOC_Os05g46950	1.0443	1.82e-09	6.16e-05	yes	up	36.6367	81.38	28.16	39.04	42.71	81.03	78.43	84.68		_
LOC_Os11g16530	1.4372	1.92e-09	6.48e-05	yes	up	1.43	4.19	1.01	1.48	1.8	4.17	4.46	3.94		RecName: Full=Putative late blight resistance protein homolog R1B-8
LOC_Os03g02580	1.1846	1.94e-09	6.58e-05	yes	up	3.94333	10.94	4.9	3.36	3.57	8.81	12.16	11.85		_
LOC_Os01g22336	2.30289	1.97e-09	6.67e-05	yes	up	2.31667	12.16	2.08	3.06	1.81	13.84	16.26	6.38		RecName: Full=Peroxidase 1; AltName: Full=Plasma membrane-bound peroxidase 1; Short=pmPOX1; Flags: Precursor
LOC_Os11g04360	6.71445	1.99e-09	6.72e-05	yes	up	0.0233333	2.72667	0.04	0.03	0	2.5	1.87	3.81		RecName: Full=Probable carboxylesterase 17; AltName: Full=AtCXE17
LOC_Os09g06620	4.3762	2.04e-09	6.91e-05	yes	up	0.1	2.21	0.04	0.18	0.08	1.88	1.41	3.34		_
LOC_Os06g23114	2.69201	2.12e-09	7.16e-05	yes	up	0.42	2.94333	0.62	0.5	0.14	2.29	3.47	3.07		RecName: Full=Primary amine oxidase; AltName: Full=Amine oxidase
LOC_Os06g06290	1.49184	2.17e-09	7.35e-05	yes	up	209.363	619.363	285.37	162.05	180.67	515.3	587.87	754.92		RecName: Full=GDSL esterase/lipase At5g45910; AltName: Full=Extracellular lipase At5g45910; Flags: Precursor
LOC_Os01g53350	3.19474	2.23e-09	7.56e-05	yes	up	0.35	3.39333	0.18	0.4	0.47	1.69	2.4	6.09		RecName: Full=UDP-glycosyltransferase 72B2
LOC_Os03g54850	1.9492	2.27e-09	7.68e-05	yes	up	0.773333	2.96667	0.78	0.48	1.06	2.27	2.96	3.67		_
LOC_Os07g03820	4.85457	2.3e-09	7.78e-05	yes	up	0.0333333	1.00333	0.02	0.02	0.06	1.08	0.69	1.24		RecName: Full=L-type lectin-domain containing receptor kinase IV.1; Short=Arabidopsis thaliana lectin-receptor kinase e; Short=AthlecRK-e; Short=LecRK-IV.1; AltNam
LOC_Os07g39090	1.05178	2.3e-09	7.79e-05	yes	up	2.87667	6.33	2.68	3.2	2.75	6.3	5.77	6.92		RecName: Full=Putative pentatricopeptide repeat-containing protein At3g23330
LOC_Os12g38460	1.41773	2.34e-09	7.9e-05	yes	up	0.836667	2.29	0.89	0.85	0.77	2.32	2.46	2.09		RecName: Full=Cortactin-binding protein 2; Short=CortBP2
LOC_Os08g31410	1.52517	2.45e-09	8.28e-05	yes	up	3.29667	10.08	2.65	3.19	4.05	10.37	12.52	7.35		RecName: Full=Sulfate transporter 1.2
LOC_Os11g42450	2.63795	2.58e-09	8.72e-05	yes	up	1.1	7.21667	0.76	0.53	2.01	6.57	5.37	9.71		RecName: Full=Probably inactive leucine-rich repeat receptor-like protein kinase At2g25790; Flags: Precursor
LOC_Os01g66379	1.26473	2.68e-09	9.07e-05	yes	up	3.41333	8.69667	2.97	3.65	3.62	8.31	8.4	9.38		RecName: Full=Peptide chain release factor 2; Short=RF-2
LOC_Os03g08200	6.45061	2.7e-09	9.12e-05	yes	up	0.05	4.43	0.05	0.05	0.05	7.27	5.29	0.73		RecName: Full=Protein LURP-one-related 6
LOC_Os03g19980	1.28429	2.76e-09	9.35e-05	yes	up	1.99333	5.17667	1.99	2.21	1.78	4.43	5.43	5.67		RecName: Full=Pentatricopeptide repeat-containing protein At2g22410, mitochondrial; Flags: Precursor
LOC_Os01g32170	1.11527	2.81e-09	9.49e-05	yes	up	3.53	8.17333	3.5	3.74	3.35	7.32	8	9.2		RecName: Full=Pentatricopeptide repeat-containing protein At5g11310, mitochondrial; Flags: Precursor
LOC_Os06g46940	1.08341	2.87e-09	9.71e-05	yes	up	17.2033	51.7333	14.36	14.6	22.65	50.36	52.07	52.77		RecName: Full=Beta-glucosidase 25; Short=Os6bglu25; Flags: Precursor
LOC_Os07g38280	1.12456	2.91e-09	9.83e-05	yes	up	4.12333	9.55667	4.2	3.92	4.25	10.99	9.69	7.99		RecName: Full=Zinc-metallopeptidase, peroxisomal; AltName: Full=Peroxisomal M16 protease
LOC_Os03g59620	1.27979	2.91e-09	9.86e-05	yes	up	4.44333	11.52	5	5	3.33	10.1	12.2	12.26		RecName: Full=Triacylglycerol lipase SDP1; AltName: Full=Protein SUGAR-DEPENDENT 1
LOC_Os08g16830	1.89642	2.99e-09	0.000101221	yes	up	5.95333	23.5933	4.31	7.96	5.59	30.55	24.17	16.06		_
LOC_Os12g42150	1.08354	3.05e-09	0.000103016	yes	up	17.1767	38.67	14.52	15.4	21.61	37.95	38.76	39.3		_
LOC_Os04g35420	1.37111	3.11e-09	0.000105231	yes	up	5.96333	16.4033	4.4	7.63	5.86	15.06	13.6	20.55		RecName: Full=ATP-dependent DNA helicase Q-like 4A; AltName: Full=RecQ-like protein 4A; Short=AtRecQ4A; Short=AtRecQl4A; AltName: Full=SGS1-like protein; Short=AtS
LOC_Os05g50080	1.60893	3.14e-09	0.000106249	yes	up	1.90333	6.14667	1.46	1.9	2.35	5.55	5.44	7.45		RecName: Full=Zinc finger CCCH domain-containing protein 39; Short=OsC3H39
LOC_Os06g45140	2.05061	3.15e-09	0.000106562	yes	up	3.16	13.8833	4.69	2.54	2.25	16.66	16.04	8.95		RecName: Full=Light-inducible protein CPRF2; AltName: Full=Common plant regulatory factor 2; Short=CPRF-2
LOC_Os04g42240	6.59679	3.19e-09	0.000107834	yes	up	0.01	1.49667	0.03	0	0	1.51	1.83	1.15		_
LOC_Os03g22610	1.06018	3.2e-09	0.00010812	yes	up	5.42667	11.9233	5.61	5.59	5.08	13.21	11.07	11.49		RecName: Full=CRS2-like protein, chloroplastic; AltName: Full=Chloroplastic RNA splicing factor 2-like protein; Flags: Precursor
LOC_Os03g17340	1.23979	3.32e-09	0.000112341	yes	up	2.48333	6.27	2.65	2.36	2.44	5.12	6.57	7.12		_
LOC_Os02g39820	1.10075	3.41e-09	0.000115328	yes	up	15.7467	36.0567	18.11	16.51	12.62	36.77	35.04	36.36		RecName: Full=Protein NUCLEAR FUSION DEFECTIVE 5, mitochondrial; Flags: Precursor
LOC_Os02g46660	1.4891	3.53e-09	0.000119383	yes	up	2.92	8.74667	2.95	3	2.81	8.43	10.5	7.31		RecName: Full=Uncharacterized membrane protein At4g09580
LOC_Os09g30250	1.62283	3.58e-09	0.000121201	yes	up	1.35333	4.36	0.97	1.39	1.7	5.05	4.7	3.33		RecName: Full=Subtilisin-like protease SBT5.3; AltName: Full=Auxin-induced in root cultures protein 3; AltName: Full=Subtilase subfamily 5 member 3; Short=AtSBT5.3;
LOC_Os08g37104	1.12544	3.62e-09	0.000122433	yes	up	5.19	12.1767	4.71	5.92	4.94	11.28	14.39	10.86		_
LOC_Os11g10530	1.36487	3.64e-09	0.000123114	yes	up	10.62	31.29	7.33	10.88	13.65	31.98	29.73	32.16		_
LOC_Os07g48960	1.00982	3.86e-09	0.000130462	yes	up	14.85	31.81	15.87	15.7	12.98	35.38	31.28	28.77		RecName: Full=Lon protease homolog, mitochondrial; Flags: Precursor
LOC_Os10g40360	1.49722	3.87e-09	0.000130992	yes	up	1.27333	3.82667	1.23	1.3	1.29	4.2	3.36	3.92		RecName: Full=Proline dehydrogenase 2, mitochondrial; AltName: Full=Osmotic stress-induced proline dehydrogenase; AltName: Full=Proline oxidase; Flags: Precursor
LOC_Os08g36220	1.6894	3.88e-09	0.000131086	yes	up	2.12667	7.48	1.93	1.5	2.95	7.07	7.11	8.26		RecName: Full=Homeobox-leucine zipper protein HOX27; AltName: Full=HD-ZIP protein HOX27; AltName: Full=Homeodomain transcription factor HOX27; AltName: Full=OsHox2
LOC_Os07g05960	1.00656	3.97e-09	0.000134328	yes	up	4.38667	9.35667	4.2	4.67	4.29	9.19	8	10.88		_
LOC_Os01g27040	1.03741	4.04e-09	0.000136682	yes	up	63.3033	137.767	60.77	76.28	52.86	134.93	127.26	151.11		RecName: Full=Probable chromatin-remodeling complex ATPase chain; AltName: Full=ISW2-like; AltName: Full=Sucrose nonfermenting protein 2 homolog
LOC_Os01g71830	7.42358	4.06e-09	0.00013722	yes	up	0.0133333	2.70667	0.04	0	0	2.01	2.67	3.44		RecName: Full=Glucan endo-1,3-beta-glucosidase GV; AltName: Full=(1-)3)-beta-glucan endohydrolase GV; AltName: Full=(1-)3)-beta-glucanase isoenzyme GV; AltName: Full
LOC_Os05g03740	1.65947	4.07e-09	0.000137722	yes	up	2.18667	7.22333	1.69	2.28	2.59	5.06	9.33	7.28		RecName: Full=Trihelix transcription factor GT-3a; AltName: Full=Trihelix DNA-binding protein GT-3a
LOC_Os10g42754	1.08156	4.13e-09	0.000139639	yes	up	3.89	7.13333	3.29	4.16	4.22	6.6	7.34	7.46		_
LOC_Os09g31280	1.30958	4.18e-09	0.000141396	yes	up	3.66	9.68667	2.96	3.82	4.2	10.33	9.64	9.09		RecName: Full=OTU domain-containing protein At3g57810
LOC_Os02g44108	2.65107	4.22e-09	0.000142721	yes	up	0.943333	6.51	1.71	0.65	0.47	7	7.41	5.12		RecName: Full=Expansin-B11; AltName: Full=Beta-expansin-11; AltName: Full=OsEXPB11; AltName: Full=OsaEXPb1.20; Flags: Precursor
LOC_Os02g02890	1.10551	4.22e-09	0.000142792	yes	up	1243.66	2865.07	1103.95	1399.04	1228	2459.09	2447.14	3688.99		RecName: Full=Peptidyl-prolyl cis-trans isomerase; Short=PPIase; AltName: Full=Cyclophilin; AltName: Full=Cyclosporin A-binding protein; AltName: Full=Rotamase
LOC_Os11g04380	1.77423	4.42e-09	0.000149638	yes	up	2.38	8.74	2.67	2.04	2.43	6.84	6.88	12.5		RecName: Full=Probable sugar phosphate/phosphate translocator At4g32390
LOC_Os05g45430	1.33354	4.55e-09	0.000153787	yes	up	12.03	32.1967	9.3	12.96	13.83	27.42	26.7	42.47		RecName: Full=LRR receptor-like serine/threonine-protein kinase GSO1; AltName: Full=Protein GASSHO 1; Flags: Precursor
LOC_Os07g06560	7.72503	4.64e-09	0.00015698	yes	up	0	3.86	0	0	0	2.49	3.22	5.87		RecName: Full=RING-H2 finger protein ATL70
LOC_Os09g27590	2.81288	4.75e-09	0.000160587	yes	up	0.566667	4.30333	0.71	0.39	0.6	2.57	4.13	6.21		_
LOC_Os01g55950	1.14293	4.78e-09	0.000161494	yes	up	2.14667	4.96333	2.09	1.93	2.42	5	4.05	5.84		RecName: Full=Putative formamidase C869.04; AltName: Full=Formamide amidohydrolase
LOC_Os05g48880	1.17459	4.83e-09	0.000163247	yes	up	7.07333	17.6367	5.42	8.17	7.63	17.18	16.63	19.1		RecName: Full=E3 SUMO-protein ligase MMS21; AltName: Full=MMS21 homolog; Short=AtMMS21; AltName: Full=Protein HIGH PLOIDY 2
LOC_Os01g56360	2.08084	4.85e-09	0.000164141	yes	up	0.496667	2.22	0.41	0.47	0.61	1.98	2.07	2.61		RecName: Full=O-acyltransferase WSD1; AltName: Full=Diacylglycerol O-acyltransferase; Short=DGAT; AltName: Full=Long-chain-alcohol O-fatty-acyltransferase; AltName:
LOC_Os11g06910	1.0485	5.01e-09	0.000169522	yes	up	8.36333	18.3467	7.61	10.09	7.39	17.14	17.4	20.5		RecName: Full=Filament-like plant protein; Short=LeFPP
LOC_Os05g08450	1.09391	5.07e-09	0.000171559	yes	up	6.73333	15.2933	6.15	6.97	7.08	15.01	13.05	17.82		_
LOC_Os06g43760	1.10727	5.11e-09	0.000172954	yes	up	25.2267	57.8933	28.08	27.4	20.2	60.62	61.56	51.5		RecName: Full=Isoleucine--tRNA ligase, cytoplasmic; AltName: Full=Isoleucyl-tRNA synthetase; Short=IRS; Short=IleRS
LOC_Os04g44620	1.16977	5.12e-09	0.000173122	yes	up	3.12667	8.17333	2.91	3.54	2.93	8.59	7.7	8.23		_
LOC_Os10g32470	1.74169	5.17e-09	0.000174704	yes	up	1.03667	3.71333	1.34	1.11	0.66	3.68	3.79	3.67		_
LOC_Os12g35070	3.48419	5.18e-09	0.000175051	yes	up	0.786667	9.48667	0.29	0.83	1.24	6.33	12.66	9.47		_
LOC_Os07g46460	1.08891	5.18e-09	0.000175344	yes	up	19.75	45.1	20.95	21.05	17.25	49.95	49.15	36.2		RecName: Full=Ferredoxin-dependent glutamate synthase, chloroplastic; AltName: Full=Fd-GOGAT; Flags: Precursor
LOC_Os09g39220	1.07802	5.2e-09	0.000175964	yes	up	5.70333	12.82	5.65	5.33	6.13	12.81	12.9	12.75		RecName: Full=Delta(14)-sterol reductase; AltName: Full=C-14 sterol reductase; AltName: Full=Protein FACKEL; AltName: Full=Sterol C14-reductase
LOC_Os05g42000	3.21992	5.28e-09	0.000178635	yes	up	0.126667	1.18	0.12	0.14	0.12	0.86	1.44	1.24		RecName: Full=Peroxidase 3; Short=Atperox P3; AltName: Full=ATPRC; AltName: Full=RCI3A; AltName: Full=Rare cold-inducible protein; Flags: Precursor
LOC_Os09g01360	1.96036	5.48e-09	0.000185354	yes	up	1.80333	7.48333	1.49	2.7	1.22	6.18	5.6	10.67		_
LOC_Os10g27470	1.40281	5.49e-09	0.00018569	yes	up	2.79333	7.86667	1.87	3.11	3.4	7.65	7.95	8		_
LOC_Os10g28230	1.62536	5.81e-09	0.000196547	yes	up	67.8633	223.693	43.93	87.83	71.83	194.04	164.27	312.77		RecName: Full=Probable histone H2A variant 2
LOC_Os01g67310	1.53058	5.85e-09	0.000197798	yes	up	3.26	9.67667	2.07	3.17	4.54	10.63	9.62	8.78		RecName: Full=Patatin-like protein 2; Short=OsPLP2
LOC_Os03g22190	1.01071	5.86e-09	0.000198292	yes	up	3.04333	6.50333	2.77	3.27	3.09	6	5.81	7.7		RecName: Full=Fanconi anemia group I protein homolog; Short=Protein FACI
LOC_Os03g59330	3.31213	5.96e-09	0.000201654	yes	up	3.86667	41.52	6.8	2.92	1.88	43.31	44.81	36.44		RecName: Full=Polygalacturonase; Short=PG; AltName: Full=Pectinase; Flags: Precursor
LOC_Os02g43300	1.57002	6.24e-09	0.000211034	yes	up	4.98667	15.5767	3.24	5.87	5.85	14.1	12.63	20		RecName: Full=Trihelix transcription factor GTL1; AltName: Full=GT2-LIKE protein 1; Short=AtGTL1; Short=Protein GT-2-LIKE1; AltName: Full=Trihelix DNA-binding prot
LOC_Os10g38820	1.60062	6.3e-09	0.000212939	yes	up	2.99	9.66	3.04	3.02	2.91	9.8	12.35	6.83		RecName: Full=Transcription factor RF2a
LOC_Os01g08850	1.25878	6.69e-09	0.000226129	yes	up	5.68667	14.4233	4.71	6.31	6.04	14.94	16.83	11.5		RecName: Full=Polynucleotide 5'-hydroxyl-kinase NOL9; AltName: Full=Nucleolar protein 9 homolog
LOC_Os08g41730	2.20098	7.07e-09	0.000239169	yes	up	1.19	5.87	1.35	1.36	0.86	5.48	7.77	4.36		RecName: Full=Proteasome subunit beta type-1; AltName: Full=20S proteasome alpha subunit F; AltName: Full=20S proteasome subunit beta-6
LOC_Os06g45920	2.40013	7.18e-09	0.00024284	yes	up	0.933333	4.75	1.41	0.55	0.84	6.37	4.56	3.32		_
LOC_Os09g27890	1.46424	7.34e-09	0.000248398	yes	up	8.95	26.1967	5.99	10.51	10.35	21.95	22.43	34.21		RecName: Full=LysM domain-containing GPI-anchored protein 1; Flags: Precursor
LOC_Os01g01840	4.14515	7.52e-09	0.000254487	yes	up	0.0566667	2.46	0.02	0.15	0	1.57	1.6	4.21		_
LOC_Os03g13370	1.08751	7.55e-09	0.000255381	yes	up	6.74667	15.2033	5.39	8.38	6.47	15.16	15.06	15.39		RecName: Full=Anaphase-promoting complex subunit 6; AltName: Full=Cell division cycle protein 16 homolog; Short=CDC16 homolog; AltName: Full=Cyclosome subunit 6;
LOC_Os09g12240	1.51905	7.6e-09	0.000257175	yes	up	1.25667	3.82667	0.94	1.72	1.11	3.8	4.39	3.29		RecName: Full=Receptor-like protein kinase BRI1-like 3; AltName: Full=BRASSINOSTEROID INSENSITIVE 1-like protein 3; Flags: Precursor
LOC_Os01g74410	2.30342	7.84e-09	0.000265225	yes	up	1.11333	5.87333	1.82	0.81	0.71	5.03	7.56	5.03		RecName: Full=Transcription factor MYB59; AltName: Full=Myb-related protein 59; Short=AtMYB59
LOC_Os06g13670	1.8817	7.88e-09	0.000266591	yes	up	2.09667	8.25333	1.59	2.99	1.71	7.76	6.12	10.88		RecName: Full=E2F transcription factor-like E2FE; AltName: Full=DP-E2F-like protein 1; AltName: Full=E2F-like repressor E2L3
LOC_Os08g40919	1.55727	8.2e-09	0.000277288	yes	up	23.0033	71.0233	16.63	23.58	28.8	84.04	84.27	44.76		_
LOC_Os05g18750	1.34967	8.2e-09	0.000277359	yes	up	5.24667	14.2467	4.43	5.55	5.76	14.72	15.94	12.08		_
LOC_Os03g53900	2.11046	8.25e-09	0.000279046	yes	up	11.0033	51.8233	16.21	10.63	6.17	60.25	65.73	29.49		_
LOC_Os01g73550	1.02226	8.38e-09	0.000283555	yes	up	15.9967	34.5867	15.47	17.86	14.66	38.35	35.97	29.44		RecName: Full=Mitochondrial-processing peptidase subunit alpha; AltName: Full=Alpha-MPP; AltName: Full=Ubiquinol-cytochrome-c reductase subunit II; Flags: Precursor
LOC_Os06g49130	1.05398	8.83e-09	0.000298513	yes	up	1.62	3.57667	1.62	1.77	1.47	3.66	3.26	3.81		RecName: Full=Probable histone acetyltransferase HAC-like 2
LOC_Os11g08110	1.31757	9.13e-09	0.000308878	yes	up	4.16667	11.1167	3.18	5.16	4.16	11.19	12.63	9.53		_
LOC_Os04g55710	1.20333	9.22e-09	0.00031182	yes	up	32.34	86.08	31.99	28.36	36.67	69.98	76.5	111.76		RecName: Full=Probable isoaspartyl peptidase/L-asparaginase 2; AltName: Full=L-asparagine amidohydrolase 2; Contains: RecName: Full=Isoaspartyl peptidase/L-asparag
LOC_Os05g33130	5.04599	9.29e-09	0.000314312	yes	up	0.0466667	1.69333	0.07	0.07	0	1.98	1.74	1.36		RecName: Full=Chitinase 2; AltName: Full=Class I chitinase b; Short=OsChia1b; AltName: Full=Pathogenesis related (PR)-3 chitinase 2; Flags: Precursor
LOC_Os02g41680	1.90735	9.49e-09	0.000321046	yes	up	10.3633	41.1033	9.45	8.96	12.68	40.33	62.55	20.43		RecName: Full=Phenylalanine ammonia-lyase
LOC_Os01g28474	2.55598	9.74e-09	0.000329364	yes	up	1.74333	11.1167	3.09	0.86	1.28	9.18	7.8	16.37		RecName: Full=Rosmarinate synthase; Short=MoRAS; AltName: Full=Hydroxycinnamoyl-CoA:hydroxyphenyllactate hydroxycinnamoyltransferase
LOC_Os01g40980	1.03883	9.78e-09	0.000330887	yes	up	5.16333	11.16	4.01	5.7	5.78	11.19	10.37	11.92		RecName: Full=Regulator of telomere elongation helicase 1 homolog
LOC_Os02g50372	1.5099	9.88e-09	0.000334281	yes	up	1.97333	6	1.76	1.64	2.52	6.24	6.29	5.47		_
LOC_Os06g37570	1.82745	1.01e-08	0.00034256	yes	up	0.96	3.66	1.13	1.08	0.67	3.55	3.49	3.94		_
LOC_Os09g34180	1.21383	1.09e-08	0.000367079	yes	up	1.93333	4.78	2.06	1.83	1.91	4.65	5.41	4.28		RecName: Full=Formin-like protein 15; AltName: Full=OsFH15; Flags: Precursor
LOC_Os01g57910	1.00687	1.09e-08	0.000368772	yes	up	12.61	27.1167	11.52	13.31	13	24.12	26.72	30.51		RecName: Full=RNA-binding protein PNO1
LOC_Os11g43810	1.00892	1.14e-08	0.000385099	yes	up	3.96	8.48333	3.87	4.53	3.48	9.13	7.79	8.53		_
LOC_Os03g43750	5.62994	1.15e-08	0.000387595	yes	up	0.173333	9.76	0.36	0.14	0.02	10.82	10.14	8.32		_
LOC_Os04g14690	1.17568	1.15e-08	0.000388253	yes	up	13.1033	31.6633	14.49	13.07	11.75	33.81	36.27	24.91		RecName: Full=Probable flavin-containing monooxygenase 1
LOC_Os07g38840	1.90403	1.16e-08	0.000391354	yes	up	1.17	5.03	1.76	0.64	1.11	4.37	5.44	5.28		_
LOC_Os02g43850	1.23184	1.24e-08	0.000420006	yes	up	14.4867	35.9233	16.43	14.44	12.59	40.34	39.56	27.87		_
LOC_Os05g31254	2.07173	1.24e-08	0.000420411	yes	up	1.47333	6.58333	0.85	2.4	1.17	5.66	5.46	8.63		RecName: Full=PAX-interacting protein 1; AltName: Full=PAX transactivation activation domain-interacting protein; AltName: Full=SMAD wing for transcriptional activ
LOC_Os04g41960	1.2671	1.33e-08	0.000450998	yes	up	57.3433	148.693	41.9	65.03	65.1	128.82	189.41	127.85		RecName: Full=2-alkenal reductase (NADP(+)-dependent); AltName: Full=Alkenal double bound reductase; AltName: Full=Allylic alcohol dehydrogenase 1; Short=allyl-ADH1;
LOC_Os05g03110	1.49474	1.34e-08	0.000451856	yes	up	2.38667	7.18667	2.14	3.07	1.95	7.4	6.41	7.75		_
LOC_Os04g31050	1.36868	1.36e-08	0.000458412	yes	up	8.65333	23.81	7.02	10.8	8.14	20.85	19.44	31.14		_
LOC_Os05g06990	1.0343	1.39e-08	0.000469749	yes	up	8.63333	18.55	9.43	8	8.47	17.74	16.95	20.96		RecName: Full=Receptor-like protein kinase HERK 1; AltName: Full=Protein HERCULES RECEPTOR KINASE 1; Flags: Precursor
LOC_Os03g14642	7.19275	1.4e-08	0.000473512	yes	up	0.02	3.48667	0	0.06	0	4.03	2.78	3.65		RecName: Full=Viral protein TPX
LOC_Os12g43830	1.18564	1.4e-08	0.000473888	yes	up	10.0267	24.3733	10.38	10.95	8.75	28.83	22.46	21.83		_
LOC_Os05g01440	1.31203	1.43e-08	0.000484472	yes	up	1.09667	2.91	1.01	1.33	0.95	2.9	3.29	2.54		RecName: Full=Probable phosphoribosylformylglycinamidine synthase, chloroplastic/mitochondrial; Short=FGAM synthase; Short=FGAMS; AltName: Full=Formylglycinamide r
LOC_Os09g23200	1.4022	1.44e-08	0.000487462	yes	up	2	5.61667	1.68	2.32	2	5.74	5.86	5.25		RecName: Full=Probable transcription factor RL9; AltName: Full=Protein ROLLED LEAF 9
LOC_Os04g40180	1.14551	1.45e-08	0.000491329	yes	up	12.2233	28.95	11.94	14.09	10.64	30.39	24.14	32.32		_
LOC_Os11g47809	3.67624	1.5e-08	0.000506345	yes	up	0.716667	10.0733	1.06	0.6	0.49	4.84	4.8	20.58		RecName: Full=Metallothionein-like protein 1A; AltName: Full=Class I metallothionein-like protein 1A; AltName: Full=OsMT-I-1a; P0C5B3.
LOC_Os02g36880	1.76694	1.52e-08	0.000513359	yes	up	2.07333	7.59667	1.57	2.12	2.53	7.73	9.71	5.35		RecName: Full=NAC domain-containing protein 100; Short=ANAC100; Short=AtNAC5
LOC_Os08g01100	2.14346	1.57e-08	0.000532619	yes	up	20.5767	97.6833	14.23	27.81	19.69	62.75	56.85	173.45		RecName: Full=HMG1/2-like protein
LOC_Os03g56660	1.19842	1.58e-08	0.000533371	yes	up	2.07667	5.12	2.06	2.38	1.79	5.43	4.78	5.15		_
LOC_Os06g44500	1.07482	1.59e-08	0.000538111	yes	up	27.8733	62.7833	27.15	29.41	27.06	54.59	53.28	80.48		_
LOC_Os12g22620	1.30747	1.64e-08	0.000553959	yes	up	2.37667	6.26	2.23	2.53	2.37	7.06	5.49	6.23		_
LOC_Os05g51020	1.11082	1.64e-08	0.000553969	yes	up	4.18333	10.1733	3.2	4.32	5.03	9.41	9.03	12.08		RecName: Full=Protein trichome birefringence-like 36
LOC_Os07g41410	3.54548	1.65e-08	0.00055688	yes	up	11.47	123.243	3.35	22.36	8.7	90.4	150.04	129.29		RecName: Full=Protein EGG APPARATUS-1; AltName: Full=ZmEA1
LOC_Os07g02940	1.63401	1.65e-08	0.000556996	yes	up	4.52667	15.0167	2.89	4.8	5.89	14.15	13.63	17.27		_
LOC_Os01g60730	2.00877	1.67e-08	0.000565708	yes	up	2.61333	11.19	1.97	4.11	1.76	10.85	14.36	8.36		RecName: Full=RING-H2 finger protein ATL72
LOC_Os04g53360	1.48267	1.74e-08	0.000587944	yes	up	2.32333	6.93667	2.06	3.05	1.86	6.05	6.23	8.53		_
LOC_Os08g04120	1.01418	1.82e-08	0.000614468	yes	up	5.25333	11.2633	5.32	4.72	5.72	12.23	11.67	9.89		_
LOC_Os06g09880	1.22465	1.89e-08	0.00063782	yes	up	1.85667	4.62	1.88	2.26	1.43	4.19	5	4.67		RecName: Full=Pentatricopeptide repeat-containing protein At3g18110, chloroplastic; AltName: Full=Protein EMBRYO DEFECTIVE 1270; Flags: Precursor
LOC_Os11g10290	1.67893	1.9e-08	0.000642253	yes	up	1.70333	5.81333	2.06	1.45	1.6	6.85	6.68	3.91		RecName: Full=G-type lectin S-receptor-like serine/threonine-protein kinase At1g61440; Flags: Precursor
LOC_Os03g04970	1.36154	1.91e-08	0.000644624	yes	up	29.0733	79.9667	31.95	31.48	23.79	63.73	65.18	110.99		RecName: Full=Chaperonin CPN60-1, mitochondrial; AltName: Full=HSP60-1; Flags: Precursor
LOC_Os05g51690	1.01898	1.99e-08	0.000674129	yes	up	8.53667	18.2733	8.76	9.41	7.44	17.24	18.73	18.85		RecName: Full=Zinc finger protein CONSTANS-LIKE 5
LOC_Os10g03100	4.17698	2.14e-08	0.000725116	yes	up	0.0533333	0.976667	0.07	0.05	0.04	1.24	1.31	0.38		RecName: Full=Probably inactive leucine-rich repeat receptor-like protein kinase At5g06940; Flags: Precursor
LOC_Os01g43060	1.24118	2.16e-08	0.000731013	yes	up	8.63667	21.93	7.16	8.04	10.71	22.19	24.59	19.01		_
LOC_Os08g16610	1.6982	2.17e-08	0.000732292	yes	up	3.06	10.5233	2.07	4.29	2.82	9.46	7.66	14.45		RecName: Full=Sister chromatid cohesion 1 protein 3; AltName: Full=SCC1 homolog 3; Short=AtRAD21-2
LOC_Os07g46720	1.66372	2.18e-08	0.000736457	yes	up	2.00667	6.67	1.1	2.2	2.72	7.49	5.88	6.64		RecName: Full=Nucleolar protein 56; AltName: Full=Ribosome biosynthesis protein sik1
LOC_Os12g10320	1.44393	2.19e-08	0.000740831	yes	up	19.5967	57.3433	27.1	17.93	13.76	50.69	56.28	65.06		RecName: Full=Glucuronoxylan 4-O-methyltransferase 1
LOC_Os03g10740	1.61236	2.21e-08	0.000746609	yes	up	4.85333	15.8433	4.41	3.92	6.23	15.45	18.78	13.3		_
LOC_Os03g11650	1.35106	2.21e-08	0.000748515	yes	up	1.17667	3.53	1.14	1.15	1.24	3.39	3.87	3.33		RecName: Full=Microtubule-associated protein 70-4; Short=AtMAP70-4; AltName: Full=70 kDa microtubule-associated protein 4
LOC_Os07g44630	1.12976	2.23e-08	0.000753665	yes	up	12.76	29.6967	11.73	15.86	10.69	27.15	32.28	29.66		RecName: Full=Thymidylate kinase; AltName: Full=dTMP kinase
LOC_Os10g05940	1.17095	2.26e-08	0.000762794	yes	up	11.57	27.9967	10.08	11.51	13.12	29.75	26.46	27.78		_
LOC_Os03g13274	1.23012	2.33e-08	0.000786626	yes	up	7.30667	17.9833	6.79	7.99	7.14	20.16	20.58	13.21		RecName: Full=Protein NRT1/ PTR FAMILY 8.1; Short=AtNPF8.1; AltName: Full=Peptide transporter PTR1
LOC_Os04g15580	7.61375	2.34e-08	0.000792392	yes	up	0	0.6	0	0	0	0.64	0.9	0.26		RecName: Full=G-type lectin S-receptor-like serine/threonine-protein kinase At1g11330; Flags: Precursor
LOC_Os05g30430	1.17531	2.37e-08	0.000800832	yes	up	4.23667	10.12	3.33	4.53	4.85	10.52	10.35	9.49		_
LOC_Os04g51190	1.03244	2.4e-08	0.000812993	yes	up	20.25	43.9567	19.21	18.52	23.02	50	45.56	36.31		RecName: Full=Growth-regulating factor 3; Short=OsGRF3; AltName: Full=Transcription activator GRF3
LOC_Os07g26595	3.8203	2.58e-08	0.000872596	yes	up	0.0333333	0.516667	0.07	0.01	0.02	0.59	0.37	0.59		_
LOC_Os02g38290	7.43226	2.6e-08	0.000878799	yes	up	0	0.703333	0	0	0	0.45	0.92	0.74		RecName: Full=Cytochrome P450 94A2; AltName: Full=P450-dependent fatty acid omega-hydroxylase
LOC_Os10g25810	6.20865	2.67e-08	0.000902873	yes	up	0.0366667	2.74333	0.05	0	0.06	2.6	2.59	3.04		_
LOC_Os05g25260	1.20145	2.69e-08	0.000908143	yes	up	19.6567	47.9367	14.52	21.25	23.2	37.01	49.49	57.31		RecName: Full=Ethylene-responsive transcription factor CRF3; AltName: Full=Protein CYTOKININ RESPONSE FACTOR 3
LOC_Os04g53320	1.74559	2.73e-08	0.0009217	yes	up	3.2	11.5933	3.56	3.19	2.85	10.83	8.85	15.1		_
LOC_Os10g38040	2.12918	2.73e-08	0.000924893	yes	up	2.10667	9.93	2.11	2.23	1.98	5.5	8.21	16.08		_
LOC_Os06g10230	1.01098	2.75e-08	0.00092935	yes	up	12.0367	25.7633	12.09	13.21	10.81	28.09	28	21.2		RecName: Full=LRR receptor-like serine/threonine-protein kinase ERECTA; AltName: Full=Protein QUANTITATIVE RESISTANCE TO PLECTOSPHAERELLA 1; AltName: Full=Protein
LOC_Os01g70220	1.06924	2.75e-08	0.000930632	yes	up	8.60667	19.23	8.3	10.53	6.99	17.93	19.33	20.43		RecName: Full=Histone-lysine N-methyltransferase, H3 lysine-9 specific SUVH4; AltName: Full=Histone H3-K9 methyltransferase 4; Short=H3-K9-HMTase 4; AltName: Full=
LOC_Os03g27990	1.28953	2.77e-08	0.0009383	yes	up	1.97	5.11667	2.04	1.9	1.97	5.64	5.69	4.02		RecName: Full=Protein STRUBBELIG-RECEPTOR FAMILY 6; AltName: Full=Leucine-rich repeat receptor kinase-like protein SRF6; Flags: Precursor
LOC_Os01g35030	1.17584	2.81e-08	0.000949512	yes	up	1.53	3.64667	1.22	1.62	1.75	4.05	3.48	3.41		RecName: Full=ABC transporter B family member 4; Short=ABC transporter ABCB.4; Short=AtABCB4; AltName: Full=Multidrug resistance protein 4; AltName: Full=P-glycopro
LOC_Os05g44260	4.93876	2.81e-08	0.000949599	yes	up	0.386667	13.55	0	0.85	0.31	11.4	15.58	13.67		_
LOC_Os05g33570	1.19491	2.92e-08	0.000986623	yes	up	9.05333	22.2133	11.02	8.14	8	22.56	25.56	18.52		RecName: Full=Pyruvate, phosphate dikinase 1, chloroplastic; AltName: Full=OsPPDKB; AltName: Full=Pyruvate, orthophosphate dikinase 1; Flags: Precursor
LOC_Os02g42330	1.10887	3.04e-08	0.00102846	yes	up	13.3267	30.9067	14.48	12.64	12.86	33.53	34.59	24.6		RecName: Full=Bifunctional nitrilase/nitrile hydratase NIT4; Short=OsNIT4; AltName: Full=Cyanoalanine nitrilase; AltName: Full=Nitrilase 4
LOC_Os04g12639	6.75599	3.07e-08	0.00103711	yes	up	0.0233333	2.73333	0	0.07	0	1.38	1.26	5.56		_
LOC_Os01g07110	1.04375	3.13e-08	0.00105705	yes	up	3.27	7.12667	3.05	3.78	2.98	6.63	6.32	8.43		RecName: Full=Breast cancer type 2 susceptibility protein homolog; AltName: Full=Fanconi anemia group D1 protein homolog
LOC_Os06g15370	1.13176	3.19e-08	0.00107927	yes	up	23.4933	55.0867	28.65	22.52	19.31	48.29	61.74	55.23		RecName: Full=Protein NRT1/ PTR FAMILY 3.1; Short=AtNPF3.1
LOC_Os05g05300	1.10576	3.31e-08	0.00111947	yes	up	2.48333	5.65333	1.9	2.74	2.81	5.47	5.2	6.29		RecName: Full=Uncharacterized CRM domain-containing protein At3g25440, chloroplastic; Flags: Precursor
LOC_Os12g11370	1.39288	3.38e-08	0.00114362	yes	up	3.72	11.3167	5.31	2.62	3.23	8.61	7.51	17.83		RecName: Full=Probable leucine-rich repeat receptor-like protein kinase At1g35710; Flags: Precursor
LOC_Os07g46380	1.47857	3.39e-08	0.00114514	yes	up	2.53	7.55	2.92	2.77	1.9	6.34	9.63	6.68		_
LOC_Os08g27290	2.80162	3.4e-08	0.00114924	yes	up	0.196667	1.53333	0.2	0.21	0.18	1.6	1.15	1.85		_
LOC_Os10g05690	2.06887	3.42e-08	0.001157	yes	up	0.4	1.76667	0.44	0.3	0.46	1.75	1.7	1.85		RecName: Full=Auxin transporter-like protein 3
LOC_Os02g49470	4.07567	3.43e-08	0.00116133	yes	up	0.0733333	4.95333	0	0.04	0.18	6.38	4.95	3.53		RecName: Full=Protein TIC 20-v, chloroplastic; AltName: Full=Translocon at the inner envelope membrane of chloroplasts 20-V; Short=AtTIC20-v; Flags: Precursor
LOC_Os07g36930	1.03059	3.56e-08	0.00120357	yes	up	9.60667	20.8	7.84	10.04	10.94	22.88	20.87	18.65		_
LOC_Os09g17930	1.05921	3.65e-08	0.00123363	yes	up	7.10667	15.7567	6.35	8.39	6.58	14.55	14.16	18.56		RecName: Full=DEAD-box ATP-dependent RNA helicase 42
LOC_Os03g59240	1.09242	3.65e-08	0.0012352	yes	up	16.48	36.9767	11.74	20.03	17.67	36.32	38.15	36.46		_
LOC_Os07g08460	1.26372	3.73e-08	0.00126082	yes	up	15.51	39.9867	14.16	17.28	15.09	37.93	29.23	52.8		RecName: Full=Auxin-responsive protein IAA24; AltName: Full=Indoleacetic acid-induced protein 24
LOC_Os01g07530	1.80623	3.75e-08	0.00126792	yes	up	0.733333	2.7	0.61	0.52	1.07	2.28	2.48	3.34		RecName: Full=Galactinol--sucrose galactosyltransferase; AltName: Full=Raffinose synthase
LOC_Os01g08800	1.56191	3.8e-08	0.00128395	yes	up	2.16	6.6	1.36	2.35	2.77	6.09	5.72	7.99		RecName: Full=Cytochrome P450 86A2; AltName: Full=Protein ABERRANT INDUCTION OF TYPE THREE 1
LOC_Os09g28780	1.65899	3.85e-08	0.00130349	yes	up	9.41667	34.9967	12.35	8.86	7.04	38.36	32.51	34.12		_
LOC_Os12g42960	1.23021	3.87e-08	0.00130903	yes	up	1.92	4.8	1.85	2.05	1.86	5.07	4.95	4.38		_
LOC_Os01g71340	7.43193	4.16e-08	0.00140689	yes	up	0	1.15333	0	0	0	0.58	1.34	1.54		RecName: Full=Glucan endo-1,3-beta-glucosidase, acidic isoform; AltName: Full=(1-)3)-beta-glucan endohydrolase; Short=(1-)3)-beta-glucanase; AltName: Full=Beta-1,3-e
LOC_Os11g34460	1.24115	4.16e-08	0.00140748	yes	up	18.2767	46.9	22.12	19.83	12.88	40.66	48.85	51.19		RecName: Full=Adagio-like protein 3
LOC_Os01g22500	1.04003	4.27e-08	0.001443	yes	up	6.6	14.4667	6.71	6.6	6.49	14.62	12.87	15.91		RecName: Full=Craniofacial development protein 1; AltName: Full=Bucentaur
LOC_Os01g50720	2.45598	4.51e-08	0.00152638	yes	up	0.533333	3.11	0.26	0.88	0.46	2.76	3.83	2.74		RecName: Full=Myb-related protein Hv33
LOC_Os01g38980	1.69269	4.52e-08	0.00153005	yes	up	11.01	37.6433	8.23	14.92	9.88	34.52	54.94	23.47		_
LOC_Os04g35790	1.21427	4.6e-08	0.00155485	yes	up	3.46	8.55667	3.9	3.29	3.19	8.02	8.98	8.67		_
LOC_Os09g01140	1.64827	4.75e-08	0.00160737	yes	up	2.31333	7.84	1.99	2.54	2.41	6.06	5.66	11.8		_
LOC_Os08g29660	2.01747	4.81e-08	0.00162646	yes	up	4.87667	20.8067	3.71	4.85	6.07	17.39	34.39	10.64		RecName: Full=Probable WRKY transcription factor 53; AltName: Full=WRKY DNA-binding protein 53
LOC_Os04g33880	1.64407	4.81e-08	0.00162733	yes	up	2.35	7.89	2.61	2.24	2.2	6.2	8.42	9.05		RecName: Full=HVA22-like protein j; Short=AtHVA22j
LOC_Os07g44030	1.92682	4.85e-08	0.0016386	yes	up	0.966667	3.98	0.6	0.87	1.43	3.88	3.4	4.66		RecName: Full=TSL-kinase interacting protein 1; AltName: Full=Myb-related protein TKI1
LOC_Os04g32930	1.3651	4.89e-08	0.00165208	yes	up	2.17333	5.93	1.66	2.52	2.34	6.47	5	6.32		RecName: Full=DNA cross-link repair protein SNM1; Short=AtSNM1
LOC_Os04g34530	1.51071	4.89e-08	0.0016533	yes	up	1.79	5.4	1.46	2.12	1.79	4.98	5.05	6.17		RecName: Full=WAT1-related protein At1g09380
LOC_Os10g01570	1.80378	4.94e-08	0.00167151	yes	up	8.05667	29.3867	5.97	11.14	7.06	21.61	21.45	45.1		RecName: Full=DNA (cytosine-5)-methyltransferase 2; AltName: Full=Chromomethylase 2; AltName: Full=DNA cytosine methyltransferase MET5; AltName: Full=Zea methyltran
LOC_Os02g38120	1.29498	4.98e-08	0.0016831	yes	up	1.31	3.41	1.14	1.38	1.41	3.17	3.51	3.55		RecName: Full=Coleoptile phototropism protein 1; AltName: Full=BTB/POZ domain-containing protein CPT1; AltName: Full=Non-phototropic hypocotyl 3-like protein; Short
LOC_Os08g08860	1.06453	5e-08	0.00169254	yes	up	3.43333	7.63667	3.66	3.17	3.47	7.27	7.25	8.39		RecName: Full=CRS2-associated factor 2, mitochondrial; Flags: Precursor
LOC_Os04g04060	1.26962	5.08e-08	0.00171777	yes	up	1.53667	4.10667	1.74	1.38	1.49	3.8	3.92	4.6		RecName: Full=Dynamin-related protein 4C
LOC_Os05g41370	4.06003	5.12e-08	0.00173171	yes	up	0.0533333	0.75	0.03	0.03	0.1	0.76	0.94	0.55		RecName: Full=Cysteine-rich receptor-like protein kinase 25; Short=Cysteine-rich RLK25; Flags: Precursor
LOC_Os03g16960	7.35827	5.19e-08	0.00175565	yes	up	0	1.25333	0	0	0	0.75	1.21	1.8		RecName: Full=Cysteine-rich repeat secretory protein 55; Flags: Precursor
LOC_Os04g57670	1.06051	5.2e-08	0.0017576	yes	up	1.53333	3.64	1.68	1.62	1.3	3.54	3.52	3.86		RecName: Full=Pentatricopeptide repeat-containing protein At3g50420
LOC_Os03g29630	1.77349	5.2e-08	0.00175859	yes	up	1.16667	4.10333	0.71	1.51	1.28	4.35	3.68	4.28		RecName: Full=Ubiquitin-like-specific protease ESD4; AltName: Full=Protein EARLY IN SHORT DAYS 4; Short=AtESD4
LOC_Os05g48360	1.19322	5.3e-08	0.00179123	yes	up	3.33667	8.07667	2.9	3.3	3.81	7.96	9.61	6.66		RecName: Full=MACPF domain-containing protein At4g24290
LOC_Os07g37100	1.62634	5.47e-08	0.0018511	yes	up	18.7633	62.5267	28.89	14.99	12.41	57.55	69.6	60.43		RecName: Full=Equilibrative nucleotide transporter 3; Short=AtENT3; AltName: Full=Nucleoside transporter ENT3; AltName: Full=Protein FLUOROURIDINE RESISTANT 1
LOC_Os11g35340	1.0353	5.58e-08	0.0018881	yes	up	5.57667	11.8867	5.52	5.38	5.83	12.67	12.57	10.42		_
LOC_Os07g49510	1.44396	5.93e-08	0.00200393	yes	up	2.93667	8.50333	2.58	2.61	3.62	7.85	7.55	10.11		_
LOC_Os05g50360	1.18088	6.19e-08	0.00209429	yes	up	7.68333	18.92	6.89	9.03	7.13	21.69	17.98	17.09		RecName: Full=Anaphase-promoting complex subunit 10; Short=APC10; AltName: Full=Cyclosome subunit 10
LOC_Os03g51230	1.04045	6.2e-08	0.0020965	yes	up	12.5567	27.3233	10.67	15.66	11.34	25.34	25.11	31.52		RecName: Full=ATP-dependent DNA helicase DDM1; AltName: Full=Protein CHROMATIN REMODELING 1; Short=CHR01; AltName: Full=Protein DECREASED DNA METHYLATION 1; Short=A
LOC_Os08g03990	1.04599	6.25e-08	0.00211463	yes	up	20.1	44.3333	20.56	24.14	15.6	42.2	41.17	49.63		_
LOC_Os05g51110	2.32686	6.28e-08	0.00212328	yes	up	0.176667	0.94	0.19	0.22	0.12	1	0.86	0.96		RecName: Full=Paired amphipathic helix protein Sin3-like 3; AltName: Full=Histone deacetylase complex subunit Sin3; Short=AtSin3; AltName: Full=Transcriptional cor
LOC_Os01g31940	1.85018	6.3e-08	0.00213188	yes	up	1.6	6.17	2.03	1	1.77	4.67	6.61	7.23		RecName: Full=Probable purine permease 4; Short=AtPUP4
LOC_Os05g35140	4.85999	6.37e-08	0.00215544	yes	up	0.0533333	1.79333	0.03	0.13	0	2.22	2.36	0.8		RecName: Full=Bidirectional sugar transporter SWEET1b; Short=OsSWEET1b
LOC_Os09g29490	1.14655	6.39e-08	0.00216204	yes	up	9.70667	23.01	11.61	8.96	8.55	20.39	26.79	21.85		RecName: Full=Peroxidase 17; Short=Atperox P17; AltName: Full=ATP25a; Flags: Precursor
LOC_Os01g72570	1.11757	6.67e-08	0.00225446	yes	up	9.36333	21.6167	9.16	6.94	11.99	21.38	21.86	21.61		_
LOC_Os04g53380	1.08774	6.76e-08	0.00228517	yes	up	6.60333	14.8633	6.63	7.98	5.2	16.87	14.52	13.2		_
LOC_Os02g37970	2.08111	6.76e-08	0.00228638	yes	up	1.16667	5.19	0.62	1.15	1.73	5.83	4.52	5.22		_
LOC_Os12g15240	1.57756	6.76e-08	0.00228715	yes	up	1.00333	3.17333	0.74	1.17	1.1	2.81	2.46	4.25		_
LOC_Os06g28790	5.42812	6.81e-08	0.00230381	yes	up	0.09	4.97	0.27	0	0	5.23	2.96	6.72		_
LOC_Os05g40920	1.84039	6.91e-08	0.00233784	yes	up	0.983333	3.87667	0.84	1.01	1.1	4.8	4.08	2.75		_
LOC_Os08g16820	3.01691	6.96e-08	0.00235541	yes	up	1.07667	9.38667	0.56	2.16	0.51	12.01	9.91	6.24		_
LOC_Os01g25500	2.69045	7.04e-08	0.00238128	yes	up	1.05333	7.35667	1.25	0.96	0.95	8.82	7.02	6.23		_
LOC_Os10g33440	1.85117	7.11e-08	0.00240334	yes	up	2.46667	12.64	1.82	2.64	2.94	7.87	8.41	21.64		RecName: Full=Putative disease resistance protein RGA3; AltName: Full=Blight resistance protein B149; AltName: Full=RGA1-blb
LOC_Os01g57350	1.11471	7.11e-08	0.0024054	yes	up	21.59	51.4467	22.73	24.45	17.59	44.73	49.9	59.71		RecName: Full=Sphingosine kinase 2
LOC_Os01g02130	2.2778	7.24e-08	0.00245006	yes	up	1.16333	5.98333	1.16	0.65	1.68	6.5	6.96	4.49		_
LOC_Os03g40770	4.12727	7.78e-08	0.00263139	yes	up	0.12	1.86667	0.04	0.04	0.28	2.27	1.9	1.43		_
LOC_Os08g42760	1.09379	7.86e-08	0.00265862	yes	up	6.43333	14.5567	5.79	7.76	5.75	12.89	14.14	16.64		RecName: Full=Probable RNA methyltransferase At5g51130
LOC_Os02g54310	1.68449	8.02e-08	0.00271223	yes	up	1.13333	3.60667	1.08	1.13	1.19	3.25	3.49	4.08		_
LOC_Os10g03780	1.21459	8.12e-08	0.00274707	yes	up	2.17333	5.37	1.95	2.8	1.77	5.35	5.18	5.58		RecName: Full=Putative F-box/FBD/LRR-repeat protein At1g78760
LOC_Os01g57440	1.25725	8.18e-08	0.00276479	yes	up	2.56667	7.18	1.98	3.25	2.47	7.84	6.74	6.96		RecName: Full=5' exonuclease Apollo; AltName: Full=DNA cross-link repair 1B protein; AltName: Full=SNM1 homolog B
LOC_Os02g20870	1.06612	8.33e-08	0.00281868	yes	up	5.27333	11.65	3.95	6	5.87	11.91	10.91	12.13		_
LOC_Os04g42634	5.75101	8.48e-08	0.00286761	yes	up	0.0533333	3.12333	0.16	0	0	3.91	4.43	1.03		_
LOC_Os01g27650	1.52047	8.54e-08	0.00288868	yes	up	1.06667	3.27667	1.03	1.34	0.83	3.01	3.5	3.32		RecName: Full=Pentatricopeptide repeat-containing protein At2g33680
LOC_Os04g47420	1.21906	8.6e-08	0.00290782	yes	up	22.3167	55.55	27.49	15.72	23.74	50.55	61.96	54.14		RecName: Full=Lysine histidine transporter-like 8; AltName: Full=Amino acid transporter-like protein 1
LOC_Os10g34960	7.34893	8.81e-08	0.00298109	yes	up	0	1.18667	0	0	0	0.83	1.2	1.53		RecName: Full=Polyubiquitin-C; Contains: RecName: Full=Ubiquitin; Contains: RecName: Full=Ubiquitin-related 1; Contains: RecName: Full=Ubiquitin-related 2; Flags: P
LOC_Os03g28080	1.55466	9.33e-08	0.00315468	yes	up	2.75667	8.60667	2.93	1.94	3.4	10.3	7.93	7.59		RecName: Full=E3 ubiquitin-protein ligase EL5; AltName: Full=Protein ELICITOR 5
LOC_Os04g35650	1.1329	9.49e-08	0.00320988	yes	up	3.73667	8.75333	4.44	3.75	3.02	8.01	8.68	9.57		RecName: Full=Pentatricopeptide repeat-containing protein At3g26540
LOC_Os05g49370	6.38868	9.49e-08	0.0032106	yes	up	0.25	22.9633	0.64	0	0.11	20.5	25.58	22.81		_
LOC_Os08g33710	1.69022	9.82e-08	0.00332266	yes	up	59.93	208.363	94.61	33.88	51.3	210.05	219.73	195.31		RecName: Full=Extracellular ribonuclease LE; Short=RNase LE; Flags: Precursor
LOC_Os04g49620	1.53866	1e-07	0.00338703	yes	up	6.06667	17.8033	4.46	6	7.74	18.93	22.49	11.99		_
LOC_Os04g35890	1.32352	1.01e-07	0.00341355	yes	up	1.64	3.76	1.65	1.51	1.76	3.44	4.36	3.48		RecName: Full=Serine/threonine-protein kinase-like protein CCR4; AltName: Full=CRINKLY 4-related kinase 1; Short=AtCRK1; AltName: Full=Protein CRINKLY 4 RELATED 4;
LOC_Os11g02310	1.23218	1.02e-07	0.00343291	yes	up	0.956667	2.37333	0.83	1.04	1	2.51	2.34	2.27		RecName: Full=Pentatricopeptide repeat-containing protein At4g18840
LOC_Os02g57870	1.09556	1.02e-07	0.00345649	yes	up	6.28333	14.1967	4.92	7.11	6.82	16.28	12.71	13.6		_
LOC_Os07g22670	1.22037	1.02e-07	0.00346579	yes	up	4.62	11.4467	3.83	5.8	4.23	10.86	13.66	9.82		_
LOC_Os09g11480	1.38027	1.03e-07	0.0034728	yes	up	23.4933	66.2333	33.08	18.62	18.78	56.58	76.16	65.96		RecName: Full=Ethylene-responsive transcription factor RAP2-2; Short=AtRAP2.2; AltName: Full=Protein RELATED TO APETALA2 2
LOC_Os10g41150	1.05358	1.03e-07	0.00348466	yes	up	8.50667	18.6833	6.73	8.68	10.11	19.13	20.69	16.23		RecName: Full=8-amino-7-oxononanoate synthase; Short=AONS; AltName: Full=7-keto-8-amino-pelargonic acid synthase; Short=7-KAP synthase; Short=KAPA synthase; AltName
LOC_Os07g33690	1.09156	1.03e-07	0.00349286	yes	up	1.13	2.54667	1	1.13	1.26	2.39	2.41	2.84		RecName: Full=Disease resistance protein RGA2; AltName: Full=Blight resistance protein RPI; AltName: Full=RGA2-blb
LOC_Os12g03370	2.97523	1.04e-07	0.00350072	yes	up	0.36	3	0.29	0.46	0.33	2.08	5.12	1.8		_
LOC_Os05g51470	1.01087	1.06e-07	0.00357821	yes	up	5.79667	12.2167	6.41	4.95	6.03	10.68	13.26	12.71		_
LOC_Os07g15270	1.03907	1.08e-07	0.00364457	yes	up	3.79667	8.31	3.68	4.55	3.16	7.99	8.07	8.87		_
LOC_Os01g72520	1.17718	1.11e-07	0.00374779	yes	up	37.37	90.08	43	34.23	34.88	93.04	110.59	66.61		RecName: Full=Non-specific phospholipase C2; Flags: Precursor
LOC_Os01g40720	1.58199	1.12e-07	0.00379125	yes	up	1.38667	4.46	1.91	1.33	0.92	4.34	3.98	5.06		RecName: Full=Putative pentatricopeptide repeat-containing protein At5g09950
LOC_Os03g59160	1.29583	1.12e-07	0.00380413	yes	up	4.08333	10.8133	3.22	4.22	4.81	9.46	9.41	13.57		RecName: Full=Elongation factor P; Short=EF-P
LOC_Os02g45620	3.5568	1.13e-07	0.00381436	yes	up	0.176667	2.14667	0.15	0.1	0.28	2.02	1.8	2.62		RecName: Full=Transcription repressor OFP6; AltName: Full=Ovate family protein 6; Short=AtOFP6
LOC_Os02g15560	2.64343	1.15e-07	0.00388769	yes	up	0.216667	1.4	0.32	0.22	0.11	0.74	1.46	2		RecName: Full=Epstein-Barr nuclear antigen 1; Short=EBNA-1; Short=EBV nuclear antigen 1
LOC_Os11g01875	1.13213	1.16e-07	0.00391842	yes	up	1.49333	3.57333	1.37	1.47	1.64	3.26	3.55	3.91		_
LOC_Os09g34200	1.34378	1.2e-07	0.00404612	yes	up	1.62667	4.37333	1.35	1.68	1.85	5.06	3.77	4.29		_
LOC_Os01g49010	1.14885	1.2e-07	0.00407144	yes	up	5.88	13.8767	6.06	5.7	5.88	11.32	12.98	17.33		RecName: Full=Origin recognition complex subunit 4
LOC_Os08g32400	1.13541	1.21e-07	0.00409817	yes	up	3.98667	9.70667	3.81	3.77	4.38	9.5	11.36	8.26		_
LOC_Os05g41100	1.05501	1.26e-07	0.00424901	yes	up	16.1433	35.8333	17.6	17.66	13.17	33.52	31.11	42.87		RecName: Full=Protein kri1
LOC_Os03g63510	1.16083	1.26e-07	0.0042646	yes	up	2.01333	4.78667	1.99	2.08	1.97	4.24	5.45	4.67		RecName: Full=Putative pentatricopeptide repeat-containing protein At1g03510
LOC_Os12g25120	1.26322	1.27e-07	0.00431115	yes	up	26.8533	68.8733	21.6	26.22	32.74	54.98	57.42	94.22		RecName: Full=Probable histone H2A.7
LOC_Os01g42350	1.05726	1.3e-07	0.00440261	yes	up	2.91	18.7067	4.21	3.05	1.47	17.38	16.55	22.19		RecName: Full=Probable pleiotropic drug resistance protein 1
LOC_Os04g46310	1.00586	1.31e-07	0.00444054	yes	up	23.7467	46.2333	23.2	24.66	23.38	49.42	46.2	43.08		RecName: Full=Uncharacterized protein At3g06530
LOC_Os01g55510	1.57088	1.32e-07	0.00445409	yes	up	15.1533	48.5967	10.94	16.29	18.23	34.71	39.59	71.49		RecName: Full=Dynein light chain 1, cytoplasmic; AltName: Full=Dynein light chain LC8-type 1 DYL1_BOVIN RecName: Full=Dynein light chain 1,
LOC_Os01g32090	1.02223	1.32e-07	0.00445557	yes	up	0.796667	1.75667	0.71	0.87	0.81	1.64	1.69	1.94		RecName: Full=Pentatricopeptide repeat-containing protein At1g71060, mitochondrial; Flags: Precursor
LOC_Os06g03540	1.36541	1.4e-07	0.00473078	yes	up	2.45	6.81667	2.14	3.27	1.94	5.91	5.89	8.65		RecName: Full=Oligopeptide transporter 7; Short=AtOPT7
LOC_Os04g49220	1.29604	1.42e-07	0.0047864	yes	up	3.44333	8.93	2.31	3.88	4.14	9.78	8.91	8.1		RecName: Full=Mitochondrial import inner membrane translocase subunit Tim13
LOC_Os04g32090	1.14348	1.56e-07	0.00526172	yes	up	3.89	9.17	3.88	4.68	3.11	8.38	8.41	10.72		RecName: Full=RecQ-mediated genome instability protein 1; AltName: Full=BLM-associated protein of 75 kDa homolog; Short=BLAP75
LOC_Os12g38400	1.01326	1.56e-07	0.00528457	yes	up	25.2633	53.73	17.98	27.71	30.1	52.07	54.21	54.91		RecName: Full=Protein rough sheath 2 homolog; AltName: Full=OsPHAN; AltName: Full=OsRS2; AltName: Full=Protein PHANTASTICA homolog
LOC_Os02g52830	1.2003	1.57e-07	0.00529451	yes	up	4.57	10.99	3.26	4.36	6.09	10.15	10.72	12.1		_
LOC_Os03g51240	1.1822	1.57e-07	0.0052996	yes	up	7.92333	19.04	9.15	8.49	6.13	15.9	21.44	19.78		RecName: Full=Glucan endo-1,3-beta-glucosidase 7; AltName: Full=(1-)3)-beta-glucan endohydrolase 7; Short=(1-)3)-beta-glucanase 7; AltName: Full=Beta-1,3-endogluca
LOC_Os07g37570	1.10904	1.57e-07	0.00530711	yes	up	16.49	38.2767	14.65	16.13	18.69	43.71	33.5	37.62		_
LOC_Os03g60200	1.08212	1.64e-07	0.00553667	yes	up	1.55	3.49333	1.55	1.52	1.58	3.53	3.65	3.3		RecName: Full=Pentatricopeptide repeat-containing protein At2g41080
LOC_Os01g11160	1.23133	1.65e-07	0.00557692	yes	up	8.54	21.3167	9.07	7.18	9.37	21.02	27.12	15.81		RecName: Full=Cationic amino acid transporter 5
LOC_Os12g01220	1.64843	1.73e-07	0.00584326	yes	up	0.783333	2.58667	0.44	1.02	0.89	2.28	2.42	3.06		_
LOC_Os07g18120	1.29324	1.75e-07	0.00592739	yes	up	1.29333	3.34667	0.95	1.68	1.25	3.34	2.93	3.77		RecName: Full=Putative aldehyde oxidase-like protein
LOC_Os03g36760	1.30954	1.78e-07	0.00602324	yes	up	1.33667	3.54	1.48	1.48	1.05	3.14	3.09	4.39		_
LOC_Os05g28040	3.43377	1.82e-07	0.00615771	yes	up	0.143333	1.66667	0.18	0.21	0.04	1.2	1.75	2.05		RecName: Full=Protein G1-like9
LOC_Os02g54190	3.36487	1.84e-07	0.00622575	yes	up	0.12	1.23667	0.05	0.07	0.24	1.55	0.94	1.22		RecName: Full=Probable pectinesterase/pectinesterase inhibitor 16; Includes: RecName: Full=Pectinesterase inhibitor 16; AltName: Full=Pectin methylesterase inhibit
LOC_Os11g47630	5.95846	1.85e-07	0.00626055	yes	up	0.0466667	2.97667	0.07	0	0.07	3.73	2.79	2.41		RecName: Full=Zinc finger protein ZAT7
LOC_Os06g04310	5.94726	1.87e-07	0.00631232	yes	up	0.04	1.8	0.08	0.04	0	1.4	1.93	2.07		_
LOC_Os03g20570	1.12049	1.88e-07	0.00634521	yes	up	7.03667	16.3833	8.39	6.04	6.68	16.11	15.87	17.17		RecName: Full=tRNA-specific adenosine deaminase 2; AltName: Full=Deaminase domain-containing protein 1; AltName: Full=tRNA-specific adenosine-34 deaminase subunit
LOC_Os07g10880	1.16176	1.9e-07	0.00642435	yes	up	3.55333	8.68	2.95	3.93	3.78	7.9	8.27	9.87		_
LOC_Os07g42220	1.30012	1.9e-07	0.00644149	yes	up	12.6333	33.6367	10.27	13.06	14.57	26.05	39.03	35.83		_
LOC_Os05g32420	3.31653	1.93e-07	0.00653299	yes	up	7.16667	76.72	12.05	6.56	2.89	86.76	97.11	46.29		_
LOC_Os04g06590	1.882	1.94e-07	0.00657696	yes	up	0.75	2.88333	0.75	1	0.5	1.86	2.21	4.58		_
LOC_Os07g43570	1.96661	2.12e-07	0.00718263	yes	up	1.11333	5.04667	1.32	1.17	0.85	6.34	6.45	2.35		RecName: Full=Cysteine-rich receptor-like protein kinase 19; Short=Cysteine-rich RLK19; Flags: Precursor
LOC_Os05g11750	1.12025	2.13e-07	0.00720674	yes	up	7.97333	18.49	5.51	9.16	9.25	19.05	19.47	16.95		RecName: Full=Serine/threonine-protein kinase PBS1; AltName: Full=AvrPphB susceptible protein 1
LOC_Os06g48180	1.42864	2.17e-07	0.00733521	yes	up	10.4167	30.41	12.32	10.49	8.44	30.71	39.83	20.69		RecName: Full=Probable xyloglucan endotransglucosylase/hydrolase protein 25; Short=At-XTH25; Short=XTH-25; Flags: Precursor
LOC_Os07g35290	1.45902	2.19e-07	0.00740106	yes	up	1.84	5.33667	1.09	2.03	2.4	5.12	5.78	5.11		RecName: Full=Cysteine-rich receptor-like protein kinase 4; Short=Cysteine-rich RLK4; Flags: Precursor
LOC_Os01g11470	2.2543	2.2e-07	0.00744773	yes	up	1.42333	4.53667	0.59	2.87	0.81	2.98	4.82	5.81		_
LOC_Os09g20180	7.09532	2.28e-07	0.00771082	yes	up	0	1.67667	0	0	0	1.26	1.3	2.47		_
LOC_Os06g14780	2.81367	2.35e-07	0.00794138	yes	up	0.263333	1.92333	0.5	0.11	0.18	1.88	1.52	2.37		_
LOC_Os02g15690	1.33951	2.37e-07	0.00799978	yes	up	5.55667	13.76	3.92	7.09	5.66	12.73	12.04	16.51		RecName: Full=Probable polygalacturonase; Short=PG; AltName: Full=Pectinase
LOC_Os03g47260	1.22136	2.42e-07	0.00818098	yes	up	4.99333	12.4433	4.86	4.34	5.78	11.69	10.94	14.7		_
LOC_Os01g51770	1.26506	2.44e-07	0.00824843	yes	up	5.86	14.9533	5.28	5.93	6.37	18.12	15.81	10.93		RecName: Full=Mitochondrial outer membrane protein porin 4; AltName: Full=Voltage-dependent anion-selective channel protein 4; Short=OsVDAC4
LOC_Os07g01490	1.1453	2.68e-07	0.00906021	yes	up	10.11	19.8233	7.54	10.28	12.51	19.01	17.22	23.24		RecName: Full=Kinesin-1; AltName: Full=Kinesin-like protein A
LOC_Os05g39320	2.19049	2.68e-07	0.00907223	yes	up	0.543333	2.67333	0.86	0.31	0.46	3.06	2.51	2.45		RecName: Full=Pyruvate decarboxylase 1; Short=PDC
LOC_Os04g46480	1.10665	2.69e-07	0.00908823	yes	up	5.33	12.4167	6.34	5.37	4.28	11.6	12.46	13.19		_
LOC_Os09g15330	1.0342	2.76e-07	0.00932446	yes	up	18.5367	40.4567	21.51	16.48	17.62	39.3	48.08	33.99		RecName: Full=Sugar transport protein 7; AltName: Full=Hexose transporter 7
LOC_Os12g02030	5.10802	2.92e-07	0.00986965	yes	up	0.0466667	1.68333	0	0.09	0.05	1.94	1.47	1.64		RecName: Full=BTB/POZ domain-containing protein At1g01640
LOC_Os10g11200	1.09684	2.92e-07	0.00987125	yes	up	6.08333	13.82	6.35	5.04	6.86	15.19	15.05	11.22		RecName: Full=Long chain base biosynthesis protein 1c
LOC_Os08g10130	6.63036	2.99e-07	0.0101085	yes	up	0.0233333	2.62667	0.07	0	0	2.72	2.64	2.52		_
LOC_Os08g05290	1.21064	3e-07	0.0101433	yes	up	9.62	23.4433	6.29	11.5	11.07	26.45	24.48	19.4		RecName: Full=Leucine-rich repeat receptor-like protein kinase TDR; AltName: Full=Protein PHLOEM INTERCALATED WITH XYLEM; AltName: Full=Tracheary element differentia
LOC_Os04g06520	1.4366	3.04e-07	0.010292	yes	up	6.23667	18.0833	4.9	9.09	4.72	16.89	20.09	17.27		_
LOC_Os12g36930	1.02447	3.05e-07	0.0103196	yes	up	24.08	52.87	21.38	21.79	29.07	55.29	47.47	55.85		_
LOC_Os08g02360	1.07186	3.1e-07	0.0105005	yes	up	5.01	11.2633	5.24	4.98	4.81	11.83	10.92	11.04		RecName: Full=Exosome complex component MTR3; AltName: Full=Exosome component 6; AltName: Full=mRNA transport regulator 3 homolog
LOC_Os11g03710	1.13963	3.14e-07	0.010622	yes	up	15.58	37.1667	13.88	13.88	18.98	34.61	37.81	39.08		RecName: Full=Mitochondrial import inner membrane translocase subunit TIM8
LOC_Os01g53260	4.63139	3.18e-07	0.0107668	yes	up	0.0866667	2.33333	0.21	0	0.05	1.73	1.04	4.23		RecName: Full=Probable WRKY transcription factor 24; AltName: Full=WRKY DNA-binding protein 24
LOC_Os05g51570	1.69323	3.19e-07	0.0107754	yes	up	1.65333	5.76	2.41	1.24	1.31	6.33	4.84	6.11		RecName: Full=Vacuolar-processing enzyme; Short=VPE; AltName: Full=Proteinase B; Flags: Precursor
LOC_Os10g01134	1.3345	3.28e-07	0.0110923	yes	up	18.01	48.4467	17.07	13.64	23.32	35.78	43.37	66.19		RecName: Full=Serine carboxypeptidase-like 18; Flags: Precursor
LOC_Os02g51040	1.04704	3.28e-07	0.0111015	yes	up	100.897	220.937	69.79	127.51	105.39	221.35	227.21	214.25		RecName: Full=Expansin-A5; AltName: Full=Alpha-expansin-5; AltName: Full=OsEXP5; AltName: Full=OsEXPA5; AltName: Full=OsaEXPa1.20; Flags: Precursor
LOC_Os12g34510	1.58219	3.3e-07	0.0111685	yes	up	69.8167	225.92	63.69	66.4	79.36	149.46	152.85	375.45		RecName: Full=Probable histone H2AXb
LOC_Os05g44930	6.18722	3.38e-07	0.0114474	yes	up	0.00666667	0.65	0.01	0.01	0	0.88	0.86	0.21		RecName: Full=Probable leucine-rich repeat receptor-like protein kinase At2g28990; Flags: Precursor
LOC_Os04g58734	5.20501	3.56e-07	0.0120412	yes	up	0.05	2.06	0.15	0	0	2.4	2.35	1.43		_
LOC_Os01g57960	1.28977	3.72e-07	0.0125782	yes	up	44.48	113.343	38.64	35.51	59.29	146.36	102.52	91.15		RecName: Full=Transposon Ty3-I Gag-Pol polyprotein; AltName: Full=Gag3-Pol3; AltName: Full=Transposon Ty3-2 TYA-TYB polyprotein; Contains: RecName: Full=Capsid pr
LOC_Os02g13310	1.0532	3.77e-07	0.0127566	yes	up	5.87	12.8333	6.5	5.68	5.43	13.68	14.54	10.28		RecName: Full=Homeobox protein ATH1
LOC_Os02g04500	1.21889	3.81e-07	0.012876	yes	up	3.06	7.58	3.81	2.71	2.66	7.2	7.39	8.15		RecName: Full=Ribosomal RNA small subunit methyltransferase H; AltName: Full=16S rRNA m(4)C1402 methyltransferase; AltName: Full=rRNA (cytosine-N(4)-)-methyltransf
LOC_Os01g42030	4.17955	3.81e-07	0.0128799	yes	up	0.586667	11.28	0.5	0.64	0.62	4.12	5	24.72		RecName: Full=Mitochondrial chaperone BCS1; AltName: Full=BCS1-like protein
LOC_Os08g36570	1.76751	3.95e-07	0.0133741	yes	up	3.35	12.1433	2.74	4.09	3.22	8.38	8.11	19.94		RecName: Full=F-box protein At1g10780
LOC_Os05g38210	1.0676	4.01e-07	0.0135517	yes	up	6.45	14.4133	5.78	6.18	7.39	12.44	14.15	16.65		RecName: Full=Mitochondrial acidic protein MAM33; Flags: Precursor
LOC_Os07g05620	1.20505	4.02e-07	0.0135959	yes	up	264.253	652.077	348.36	229.46	214.94	714.15	714.47	527.61		RecName: Full=CBL-interacting protein kinase 23; AltName: Full=OsCIPK23
LOC_Os02g32030	1.01754	4.08e-07	0.0137962	yes	up	230.637	498.28	267.58	253.6	170.73	493.96	509.11	491.77		RecName: Full=Elongation factor 2; Short=EF-2
LOC_Os04g50212	2.53068	4.15e-07	0.0140423	yes	up	0.373333	2.11	0.28	0.49	0.35	2.49	1.98	1.86		RecName: Full=Probable sugar phosphate/phosphate translocator At4g32390
LOC_Os01g48874	2.34382	4.24e-07	0.0143258	yes	up	0.346667	1.84333	0.14	0.42	0.48	1.6	2.36	1.57		RecName: Full=O-acyltransferase WSD1; AltName: Full=Diacylglycerol O-acyltransferase; Short=DGAT; AltName: Full=Long-chain-alcohol O-fatty-acyltransferase; AltName:
LOC_Os07g26740	1.32174	4.39e-07	0.0148492	yes	up	37.6833	108.643	39.02	44.28	29.75	108.29	94.69	122.95		RecName: Full=60S ribosomal protein L44
LOC_Os11g03660	3.36795	4.43e-07	0.0149662	yes	up	0.283333	3.11333	0.25	0.24	0.36	3.06	3.15	3.13		_
LOC_Os02g34700	1.07014	4.46e-07	0.0150669	yes	up	1.54333	3.44667	1.45	1.75	1.43	3.37	3.7	3.27		RecName: Full=Putative pentatricopeptide repeat-containing protein At5g40405
LOC_Os03g15550	1.41413	4.49e-07	0.0151864	yes	up	1.06667	2.97667	0.87	1.25	1.08	3.14	3.45	2.34		RecName: Full=Phosphatidylinositol 4-phosphate 5-kinase 2; Short=AtPIP5K2; AltName: Full=1-phosphatidylinositol 4-phosphate kinase 2; AltName: Full=Diphosphoinosit
LOC_Os08g04240	6.99848	4.51e-07	0.0152553	yes	up	0	0.873333	0	0	0	0.95	0.51	1.16		RecName: Full=Cysteine-rich repeat secretory protein 55; Flags: Precursor
LOC_Os06g10750	2.24391	4.52e-07	0.0152794	yes	up	0.316667	1.59333	0.27	0.34	0.34	1.37	1.95	1.46		RecName: Full=WAT1-related protein At1g21890
LOC_Os02g21430	1.32748	4.63e-07	0.0156559	yes	up	0.806667	2.16667	0.85	0.88	0.69	1.87	2.36	2.27		RecName: Full=Protein MEI2-like 5; Short=OML5; AltName: Full=MEI2-like protein 5
LOC_Os09g25290	2.37977	4.71e-07	0.0159363	yes	up	0.296667	1.62667	0.24	0.26	0.39	1.71	2.01	1.16		RecName: Full=DNA-3-methyladenine glycosylase 1; AltName: Full=3-methyladenine-DNA glycosylase I, constitutive; Short=TAG I; AltName: Full=DNA-3-methyladenine glycosi
LOC_Os06g20354	1.24346	5.25e-07	0.0177678	yes	up	3.44333	8.69667	2.31	4.16	3.86	8.75	9.05	8.29		RecName: Full=60S ribosomal protein L15-1
LOC_Os07g32570	1.02032	5.3e-07	0.0179374	yes	up	42.6333	90.9233	44.84	34.75	48.31	72.02	86.62	114.13		RecName: Full=Probable 5'-adenylylsulfate reductase 1, chloroplastic; AltName: Full=Adenosine 5'-phosphosulfate 5'-adenylylsulfate sulfotransferase 1; Short=APS sul
LOC_Os06g40940	1.38778	5.31e-07	0.0179741	yes	up	4.31667	11.8033	4.64	4.8	3.51	8.95	10.46	16		RecName: Full=Glycine dehydrogenase (decarboxylating) 1, mitochondrial; AltName: Full=Glycine cleavage system P protein 1; AltName: Full=Glycine decarboxylase 1; A
LOC_Os09g01000	1.45556	5.33e-07	0.018029	yes	up	2410.34	6737.41	1898.72	1683.16	3649.14	9075.66	5444.92	5691.66		_
LOC_Os05g32270	1.00753	5.34e-07	0.0180755	yes	up	17.3967	37.4167	14.05	19.89	18.25	42.22	38.65	31.38		RecName: Full=AP2-like ethylene-responsive transcription factor At2g41710
LOC_Os02g05300	2.47904	5.48e-07	0.0185493	yes	up	0.26	1.27333	0.11	0.21	0.46	1.56	1.42	0.84		_
LOC_Os07g12590	1.28963	5.6e-07	0.018924	yes	up	1.41333	3.69667	1.33	1.77	1.14	3.51	3.71	3.87		_
LOC_Os05g09500	1.49732	5.74e-07	0.0194197	yes	up	1.68667	5.09333	2.05	1.64	1.37	5.78	5.69	3.81		RecName: Full=Hexokinase-7; AltName: Full=Hexokinase-6
LOC_Os03g20440	1.85036	5.77e-07	0.0195211	yes	up	1.49	5.69667	1.12	1.6	1.75	4.65	8	4.44		_
LOC_Os01g24940	1.11044	5.78e-07	0.0195423	yes	up	5.97333	13.6933	4.68	7.53	5.71	12.6	11.91	16.57		RecName: Full=Poly
LOC_Os11g39220	1.00107	5.82e-07	0.019699	yes	up	11.6033	24.8233	13.01	12.57	9.23	23.65	28.11	22.71		RecName: Full=Acyl-coenzyme A oxidase 2, peroxisomal; Short=AOX 2; AltName: Full=Long-chain acyl-CoA oxidase; Short=AtCX2; Flags: Precursor
LOC_Os02g33705	1.51767	5.84e-07	0.0197578	yes	up	1.38	4.19667	1.19	1.4	1.55	3.21	4.11	5.27		_
LOC_Os03g48480	1.48576	5.96e-07	0.0201624	yes	up	3.78	11.3467	3.96	3.24	4.14	8.81	9.36	15.87		RecName: Full=Putative esterase HI_1161
LOC_Os03g17870	3.4877	5.98e-07	0.0202387	yes	up	12.46	166.897	15.73	16.4	5.25	265	120.97	114.72		RecName: Full=Metallothionein-like protein 1B; AltName: Full=Class I metallothionein-like protein 1B; AltName: Full=OsMT-I-1b
LOC_Os08g43480	1.75908	5.99e-07	0.0202533	yes	up	0.93	3.30333	0.85	1.11	0.83	3.54	3.27	3.1		RecName: Full=E3 ubiquitin ligase BIG BROTHER-related; Short=AtBBR
LOC_Os03g45960	3.67701	6.02e-07	0.0203623	yes	up	0.163333	2.19333	0.19	0	0.3	3.15	2.14	1.29		RecName: Full=Zeamatin; Flags: Precursor
LOC_Os08g07550	1.11758	6.05e-07	0.0204737	yes	up	7.67	17.7533	6.24	7.55	9.22	17.44	17.05	18.77		_
LOC_Os04g52920	1.29106	6.11e-07	0.020653	yes	up	2.17	4.22	1.58	2.05	2.88	4.33	4.06	4.27		_
LOC_Os01g05900	1.17307	6.16e-07	0.0208238	yes	up	82.47	200.697	66.48	97.37	83.56	168.35	156.47	277.27		RecName: Full=Histone H2B.10
LOC_Os03g49200	1.75214	6.32e-07	0.0213646	yes	up	1.76	6.74	0.95	2.35	1.98	5.05	4.45	10.72		RecName: Full=Denticleless protein homolog
LOC_Os10g28000	1.57825	6.38e-07	0.0215737	yes	up	1.61667	4.64667	0.99	1.9	1.96	5.28	4.7	3.96		RecName: Full=Glutathione reductase, chloroplastic; Short=GR; Short=GRase; Flags: Precursor
LOC_Os07g36130	1.40936	6.47e-07	0.0218699	yes	up	70.8867	212.097	46.26	73.88	92.52	173.25	176.22	286.82		RecName: Full=Probable histone H2A.1
LOC_Os02g01610	1.26295	6.61e-07	0.0223522	yes	up	1.03333	2.69333	1.23	1.03	0.84	2.69	2.64	2.75		RecName: Full=Putative pentatricopeptide repeat-containing protein At1g68930
LOC_Os11g03430	1.48069	6.75e-07	0.0228293	yes	up	2.06667	6.17333	2.18	2.42	1.6	5.29	4.59	8.64		RecName: Full=Cell division control protein 45 homolog; AltName: Full=Suppressor of nda4 protein
LOC_Os01g27160	1.18809	6.82e-07	0.023057	yes	up	1.90667	4.63667	1.99	2.3	1.43	4.75	4.49	4.67		RecName: Full=Cullin-1
LOC_Os07g35280	3.24579	6.9e-07	0.0233272	yes	up	0.126667	1.19333	0.02	0.07	0.29	1.03	1.39	1.16		RecName: Full=Cysteine-rich receptor-like protein kinase 10; Short=Cysteine-rich RLK10; AltName: Full=Receptor-like protein kinase 4; Flags: Precursor
LOC_Os09g29420	1.02731	7.19e-07	0.0243182	yes	up	7.17	15.7333	5.88	8.34	7.29	18.62	15.16	13.42		RecName: Full=Queuine tRNA-ribosyltransferase; AltName: Full=Guanine insertion enzyme; AltName: Full=tRNA-guanine transglycosylase
LOC_Os11g34700	1.34887	7.22e-07	0.0244024	yes	up	0.83	2.21333	0.92	0.94	0.63	2.17	2	2.47		_
LOC_Os01g17330	2.13072	7.36e-07	0.0248759	yes	up	0.673333	3.13	0.71	0.41	0.9	3	2.79	3.6		RecName: Full=Eukaryotic translation initiation factor 6-2; Short=AteIF-6;2
LOC_Os04g56780	6.84355	7.47e-07	0.0252619	yes	up	0	1.45	0	0	0	1.46	1.74	1.15		RecName: Full=WUSCHEL-related homeobox 1A; AltName: Full=OsWOX1A; Short=OsWOX1; AltName: Full=Protein WUS
LOC_Os01g66730	1.44182	7.99e-07	0.0270173	yes	up	1.61333	4.69667	1.56	1.56	1.72	5.18	4.59	4.32		RecName: Full=Putative exosome complex component rrp40; AltName: Full=Exosome component 3; AltName: Full=Ribosomal RNA-processing protein 40
LOC_Os05g49100	3.27682	8.15e-07	0.0275698	yes	up	0.123333	1.27667	0.16	0.05	0.16	1.03	0.91	1.89		RecName: Full=Probable WRKY transcription factor 71; AltName: Full=WRKY DNA-binding protein 71
LOC_Os02g47650	1.15624	8.34e-07	0.028212	yes	up	57.1533	147.917	56.67	48.51	66.28	114.47	137.06	192.22		_
LOC_Os06g01990	2.39707	8.4e-07	0.0283984	yes	up	0.98	5.46667	1.15	0.52	1.27	6.23	7.31	2.86		RecName: Full=Haloacid dehalogenase-like hydrolase domain-containing protein Sgpp; AltName: Full=Subclass I phosphosugar phosphatase; Short=AtSgpp
LOC_Os07g47470	1.41884	8.43e-07	0.0285144	yes	up	1.94333	5.57333	2.01	2.48	1.34	5.6	5.07	6.05		RecName: Full=Pentatricopeptide repeat-containing protein At2g32630
LOC_Os02g38130	1.27503	8.59e-07	0.0290516	yes	up	2.91	7.45	1.91	3.47	3.35	7.21	6.7	8.44		RecName: Full=NAC domain-containing protein 8; Short=ANAC008
LOC_Os05g51520	1.05846	8.66e-07	0.0292822	yes	up	7.51667	16.7733	9.19	7.07	6.29	14.86	17.05	18.41		_
LOC_Os02g40420	1.70326	8.74e-07	0.0295456	yes	up	0.666667	2.33333	0.58	0.95	0.47	2.09	2	2.91		_
LOC_Os10g06800	2.65013	8.79e-07	0.0297225	yes	up	0.47	3.17	0.63	0.36	0.42	4.28	2.04	3.19		RecName: Full=Calcium-dependent protein kinase 3; AltName: Full=Calcium-dependent protein kinase isoform CDPK6; Short=AtCDPK6
LOC_Os08g30770	1.23413	9.03e-07	0.0305449	yes	up	0.893333	2.23667	0.84	1.04	0.8	2.07	2.11	2.53		RecName: Full=ABC transporter A family member 7; Short=ABC transporter ABCA.7; Short=AtABCA7; AltName: Full=Probable ABC2 homolog 6
LOC_Os06g14220	4.57968	9.03e-07	0.0305505	yes	up	0.0666667	1.64667	0	0.11	0.09	1.29	2.88	0.77		RecName: Full=Cytosolic sulfotransferase 5; Short=AtSOT5; AltName: Full=Flavonoid 7-sulfotransferase 3a; Short=AtST3a
LOC_Os05g46470	1.80093	9.46e-07	0.0319802	yes	up	2.55667	9.66333	2.54	3.27	1.86	8.96	8.01	12.02		_
LOC_Os05g50100	2.62495	9.49e-07	0.0320995	yes	up	0.953333	6.19667	0.8	0.45	1.61	7.27	8.2	3.12		_
LOC_Os12g18530	1.02335	9.5e-07	0.0321272	yes	up	1.46667	3.16	1.29	1.5	1.61	2.94	3.46	3.08		_
LOC_Os08g35870	1.08534	9.76e-07	0.0329957	yes	up	4.35667	9.71333	3.28	5.24	4.55	10.1	10.32	8.72		_
LOC_Os05g12330	2.91901	9.79e-07	0.033092	yes	up	0.67	5.44333	0.17	1.29	0.55	5.04	6.66	4.63		RecName: Full=KAT8 regulatory NSL complex subunit 3; AltName: Full=NSL complex protein NSL3; AltName: Full=Non-specific lethal 3 homolog; AltName: Full=Serum inhi
LOC_Os01g64900	1.09401	9.86e-07	0.0333308	yes	up	5.98333	13.54	4.93	7.22	5.8	12.19	10.74	17.69		_
LOC_Os12g13720	1.03446	9.93e-07	0.0335965	yes	up	1.36	2.96	1.17	1.63	1.28	3.29	2.91	2.68		RecName: Full=ABC transporter G family member 43; Short=ABC transporter ABCG.43; Short=AtABCG43; AltName: Full=Putative pleiotropic drug resistance protein 15
LOC_Os03g25330	5.30916	9.96e-07	0.0336749	yes	up	0.03	1.36333	0.09	0	0	0.62	1.13	2.34		RecName: Full=Peroxidase 2; AltName: Full=Plasma membrane-bound peroxidase 2; Short=pmPOX2; Flags: Precursor
LOC_Os01g67740	1.63568	1.01e-06	0.034122	yes	up	6.39333	21.16	5.51	9.88	3.79	17.4	16.3	29.78		RecName: Full=Structural maintenance of chromosomes protein 2-1; Short=AtSMC2-1; AltName: Full=Chromosome-associated protein E-1; Short=AtCAP-E1; AltName: Full=Pr
LOC_Os02g33790	1.86198	1.01e-06	0.0342123	yes	up	1.57	6.11333	1.16	1.8	1.75	4.64	6.88	6.82		_
LOC_Os03g47270	1.44971	1.01e-06	0.0343029	yes	up	138.99	411.147	216.91	93.61	106.45	384.12	382.49	466.83		RecName: Full=ATP-dependent RNA helicase DED1
LOC_Os09g26760	1.81348	1.04e-06	0.0350564	yes	up	1.06	3.92333	0.69	1.67	0.82	3.21	2.94	5.62		RecName: Full=DNA cross-link repair protein SNM1; Short=AtSNM1
LOC_Os01g70130	1.2531	1.05e-06	0.0353489	yes	up	3.93	8.89667	4.66	3.56	3.57	8.86	11.13	6.7		RecName: Full=Probable serine/threonine-protein kinase At1g54610
LOC_Os06g14050	5.16588	1.07e-06	0.0360959	yes	up	0.0166667	0.686667	0.02	0.03	0	0.85	0.91	0.3		RecName: Full=MACPF domain-containing protein At1g14780
LOC_Os12g41230	1.04396	1.07e-06	0.0362009	yes	up	41.11	90.1933	38.94	50.13	34.26	80.95	74.62	115.01		RecName: Full=Protein tesmin/TSO1-like CXC 2; Short=AtTCX2; AltName: Full=Protein TSO1-like 2; Short=Protein SOL2
LOC_Os08g44640	1.42761	1.08e-06	0.0364023	yes	up	1.08667	3.03333	1.13	0.92	1.21	3.24	2.84	3.02		RecName: Full=Serine carboxypeptidase-like 51; Flags: Precursor
LOC_Os12g03130	1.87236	1.08e-06	0.0364551	yes	up	1.37333	5.36667	1.11	2.03	0.98	3.7	3.99	8.41		RecName: Full=Cell division control protein 45 homolog; AltName: Full=Suppressor of nda4 protein
LOC_Os01g09470	1.23462	1.09e-06	0.0368821	yes	up	2.09333	5.23	1.75	2.18	2.35	5.04	4.36	6.29		RecName: Full=Protein IQ-DOMAIN 31
LOC_Os03g05440	1.99451	1.09e-06	0.0370034	yes	up	0.523333	2.36667	0.48	0.39	0.7	2.46	2.74	1.9		RecName: Full=UPF0496 protein 3
LOC_Os01g06920	1.33259	1.1e-06	0.0373413	yes	up	2.45	6.05333	1.69	2.96	2.7	6.87	4.63	6.66		RecName: Full=Receptor-like protein 12; Short=AtRLP12; Flags: Precursor
LOC_Os02g36940	1.22423	1.1e-06	0.037362	yes	up	12.39	30.6433	10.33	13.32	13.52	33.84	37.02	21.07		RecName: Full=Cell number regulator 2; AltName: Full=ZmCNR02
LOC_Os02g17330	1.25184	1.14e-06	0.0385132	yes	up	2.79	7.04333	2.14	3.23	3	7.59	7.96	5.58		RecName: Full=Branched-chain-amino-acid aminotransferase-like protein 3, chloroplastic; Flags: Precursor
LOC_Os05g49940	2.68281	1.16e-06	0.0392188	yes	up	1	6.75	0.59	0.36	2.05	6.46	7.8	5.99		_
LOC_Os02g08470	1.18779	1.18e-06	0.0400129	yes	up	5.83	11.1633	4.35	6.2	6.94	10.68	11.29	11.52		_
LOC_Os03g56950	1.52924	1.21e-06	0.0410687	yes	up	6.1	18.6233	8.33	4.74	5.23	21.14	22.92	11.81		RecName: Full=Transcription factor PIF5; AltName: Full=Basic helix-loop-helix protein 65; Short=AtbHLH65; Short=bHLH 65; AltName: Full=Phytochrome interacting facto
LOC_Os07g18510	1.49004	1.23e-06	0.0414688	yes	up	3.91333	11.6467	2.99	5.18	3.57	10.5	7.9	16.54		_
LOC_Os03g56850	1.06004	1.23e-06	0.0414725	yes	up	2	4.47667	2.15	2.11	1.74	4.84	4.78	3.81		RecName: Full=Pentatricopeptide repeat-containing protein At4g21300
LOC_Os04g35100	1.56133	1.26e-06	0.0426306	yes	up	1.61333	5.19667	1.2	1.25	2.39	4.1	4.78	6.71		RecName: Full=PI-PLC X domain-containing protein At5g67130; Flags: Precursor
LOC_Os06g48660	1.48709	1.27e-06	0.0429375	yes	up	0.633333	1.91	0.7	0.68	0.52	2.01	1.75	1.97		RecName: Full=Pentatricopeptide repeat-containing protein At1g11290
LOC_Os10g36360	1.83827	1.29e-06	0.0437264	yes	up	2.55	9.54	1.91	1.85	3.89	10.1	9.96	8.56		_
LOC_Os03g24950	1.19527	1.34e-06	0.0452746	yes	up	6.68	16.3333	7.34	4.75	7.95	17.91	18.67	12.42		_
LOC_Os06g15620	1.079	1.34e-06	0.0454507	yes	up	87.9633	198.477	66.67	91.22	106	168.58	165.59	261.26		RecName: Full=Gibberellin-regulated protein 13; AltName: Full=GAST1 protein homolog 13; Flags: Precursor
LOC_Os07g31430	2.09783	1.36e-06	0.0459082	yes	up	0.593333	2.70667	0.71	0.33	0.74	2.1	2.35	3.67		_
LOC_Os04g53850	2.11054	1.37e-06	0.0462159	yes	up	1.45667	6.53667	2.26	1.36	0.75	3.83	6.14	9.64		RecName: Full=Dihydroflavonol-4-reductase; Short=DFR; AltName: Full=Dihydrokaempferol 4-reductase
LOC_Os11g39580	6.97787	1.38e-06	0.0467112	yes	up	0	0.906667	0	0	0	0.83	0.34	1.55		_
LOC_Os03g21870	1.90773	1.39e-06	0.0468954	yes	up	0.92	3.67667	0.72	1.08	0.96	2.94	4.75	3.34		RecName: Full=Transcription repressor OFP3; AltName: Full=Ovate family protein 3; Short=AtOFP3
LOC_Os02g48570	1.56619	1.39e-06	0.0470578	yes	up	0.63	1.90333	0.46	0.73	0.7	2.02	1.71	1.98		RecName: Full=Protein NRT1/ PTR FAMILY 7.3; Short=AtNPF7.3; AltName: Full=Nitrate transporter 1.5
LOC_Os08g38092	1.62392	1.39e-06	0.0471254	yes	up	0.84	2.74	0.68	0.78	1.06	2.45	2.98	2.79		RecName: Full=Alpha/beta hydrolase domain-containing protein 17A; Flags: Precursor
LOC_Os05g25630	1.88922	1.41e-06	0.0476769	yes	up	31.4033	130.313	55.88	17.73	20.6	128	141.43	121.51		_
LOC_Os07g36920	1.82569	1.43e-06	0.048319	yes	up	0.64	2.40333	0.51	0.8	0.61	2.63	2.74	1.84		_
LOC_Os10g30610	1.05139	1.47e-06	0.0497719	yes	up	1.51	3.19333	1.34	1.35	1.84	3.09	3.19	3.3		RecName: Full=ABC transporter G family member 28; Short=ABC transporter ABCG.28; Short=AtABCG28; AltName: Full=Putative white-brown complex homolog protein 29; Sho
LOC_Os01g03840	2.79759	1.47e-06	0.0498303	yes	up	0.883333	5.56667	0.1	1.09	1.46	6.56	5.96	4.18		RecName: Full=Zinc finger protein STAMENLESS 1; AltName: Full=OsJAG; AltName: Full=Zinc finger protein OPEN BEAK
LOC_Os02g47400	1.18595	1.47e-06	0.0498749	yes	up	2.14	5.13667	1.73	2.09	2.6	4.33	5.92	5.16		_
LOC_Os01g06320	-6.56328	0	0	yes	down	346.213	3.89333	327.92	382.65	328.07	4.1	4.27	3.31		RecName: Full=Protein REVEILLE 8; AltName: Full=MYB-like transcription factor; AltName: Full=Protein LHY-CCA1-like 5
LOC_Os02g45570	-5.56326	3.94e-206	1.33e-201	yes	down	195.793	4.51667	191.43	174.39	221.56	4.47	4.51	4.57		RecName: Full=Growth-regulating factor 10; Short=OsGRF10; AltName: Full=Transcription activator GRF10
LOC_Os07g44290	-5.45841	8.89e-161	3.01e-156	yes	down	53.05	1.28	54.97	46.24	57.94	1.18	1.15	1.51		RecName: Full=CBL-interacting protein kinase 21; AltName: Full=OsCIPK21
LOC_Os01g45090	-4.45689	7.95e-160	2.69e-155	yes	down	302.983	14.3767	286.68	287.88	334.39	14.54	11.45	17.14		RecName: Full=Transcription factor MYB24; AltName: Full=Myb-related protein 24; Short=AtMYB24
LOC_Os11g29290	-4.93775	3.61e-117	1.22e-112	yes	down	109.643	3.82667	131	103.18	94.75	3.06	4.11	4.31		RecName: Full=Cytochrome P450 94B3; AltName: Full=Jasmonoyl-isoleucine-12-hydroxylase
LOC_Os01g63930	-4.48491	7.5e-113	2.54e-108	yes	down	26.1933	1.25333	27.28	26.61	24.69	0.92	1.39	1.45		RecName: Full=Cytochrome P450 94C1
LOC_Os01g50400	-3.55725	2.22e-105	7.49e-101	yes	down	347.587	31.45	347.91	339.27	355.58	36.7	30.58	27.07		RecName: Full=Mitogen-activated protein kinase kinase kinase YODA; AltName: Full=YODA MAPKK kinase
LOC_Os12g12580	-4.50293	1.31e-102	4.42e-98	yes	down	245.863	11.5333	308.2	205.66	223.73	11.28	10.39	12.93		RecName: Full=2-alkenal reductase (NADP(+)-dependent); AltName: Full=Alkenal double bound reductase; AltName: Full=Allylic alcohol dehydrogenase 1; Short=allyl-ADH1;
LOC_Os07g48130	-2.96804	1.48e-96	5e-92	yes	down	184.053	24.7367	189.76	173.49	188.91	21.85	24.46	27.9		RecName: Full=Probable potassium transporter 9; AltName: Full=OsHAK9
LOC_Os06g40170	-5.13394	7.18e-96	2.43e-91	yes	down	200.74	6.05667	254.84	159.76	187.62	7.2	6.47	4.5		RecName: Full=Phospholipase D alpha 2; Short=PLD alpha 2; AltName: Full=Choline phosphatase 2; AltName: Full=Phosphatidylcholine-hydrolyzing phospholipase D 2
LOC_Os03g51920	-4.10247	4.04e-90	1.37e-85	yes	down	17.38	1.08	17.01	17.88	17.25	1.2	1.09	0.95		RecName: Full=Probable zinc metalloprotease EGY3, chloroplastic; AltName: Full=Protein ETHYLENE-DEPENDENT GRAVITROPISM-DEFICIENT AND YELLOW-GREEN 3; Short=OsEGY3; F
LOC_Os04g54620	-4.9994	1.33e-88	4.51e-84	yes	down	1697.87	56.4867	1544.9	1481.33	2067.38	60.44	66.9	42.12		_
LOC_Os08g28710	-3.42032	1.57e-86	5.32e-82	yes	down	55.1	5.47	50.38	64.17	50.75	4.8	6.04	5.57		RecName: Full=Putative serine/threonine-protein kinase-like protein CCR3; AltName: Full=Protein CRINKLY 4 RELATED 3; Short=AtCRR3; Flags: Precursor
LOC_Os07g40250	-3.62569	3.73e-85	1.26e-80	yes	down	30.8567	2.62	30.63	26.63	35.31	2.74	2.67	2.45		RecName: Full=Momilactone A synthase; Short=OsMAS
LOC_Os01g06560	-5.15098	4.86e-85	1.64e-80	yes	down	137.837	4.11333	137.18	123.27	153.06	3.4	6.13	2.81		_
LOC_Os06g50950	-4.98163	1.3e-78	4.41e-74	yes	down	128.377	4.25	150.82	118.64	115.67	4.27	5.79	2.69		RecName: Full=GDSL esterase/lipase At5g55050; AltName: Full=Extracellular lipase At5g55050; Flags: Precursor
LOC_Os03g28940	-3.59781	1.97e-77	6.67e-73	yes	down	812.553	71.8033	957.81	739.17	740.68	71.07	83.32	61.02		RecName: Full=Protein TIFY 10B; AltName: Full=Jasmonate ZIM domain-containing protein 2
LOC_Os02g02140	-4.33748	8.41e-77	2.84e-72	yes	down	7.78667	0.406667	7.39	7.39	8.58	0.35	0.38	0.49		RecName: Full=Leucine-rich repeat receptor-like protein kinase PXL2; AltName: Full=Protein PHLOEM INTERCALATED WITH XYLEM-LIKE 2; Flags: Precursor
LOC_Os04g46280	-3.03298	1.76e-76	5.95e-72	yes	down	92.5067	12.03	88.62	99.22	89.68	9.93	13.9	12.26		RecName: Full=Nudix hydrolase 8; Short=AtNUDT8
LOC_Os06g44010	-6.04166	2.34e-76	7.91e-72	yes	down	68.92	1.11	52.24	52.66	101.86	1.03	1.58	0.72		RecName: Full=Probable WRKY transcription factor 40; AltName: Full=WRKY DNA-binding protein 40
LOC_Os01g50410	-3.68941	7.49e-75	2.53e-70	yes	down	387.857	31.97	352.96	397.53	413.08	30.05	41.17	24.69		RecName: Full=Mitogen-activated protein kinase kinase kinase A; AltName: Full=MAPK/ERK kinase 1; Short=MEK kinase 1; Short=MEKK 1; AltName: Full=MAPK/ERK kinase A;
LOC_Os01g01870	-3.84729	2.19e-70	7.42e-66	yes	down	127.243	9.44333	122.99	128.61	130.13	6.31	9.73	12.29		_
LOC_Os09g28880	-3.36705	2.25e-70	7.61e-66	yes	down	53.36	5.67667	59.6	52.07	48.41	6.34	5.17	5.52		RecName: Full=Protein MIZU-KUSSEI 1
LOC_Os06g10210	-3.10758	1.28e-69	4.34e-65	yes	down	82.7433	10.0967	69.64	80.43	98.16	9.97	8.68	11.64		RecName: Full=Fatty-acid-binding protein 2; Short=AtFAP2; AltName: Full=Chalcone-flavanone isomerase family protein 2
LOC_Os03g32314	-3.0286	1.19e-67	4.04e-63	yes	down	433.34	55.84	499.61	393.07	407.34	48.83	64.45	54.24		RecName: Full=Allene oxide cyclase 3, chloroplastic; Flags: Precursor
LOC_Os10g25290	-3.41748	6.39e-67	2.16e-62	yes	down	594.017	59.3333	618.5	532.85	630.7	60.69	71.85	45.46		_
LOC_Os05g49140	-3.28884	3.3e-66	1.12e-61	yes	down	315.223	34.4167	358.67	262.25	324.75	32.64	40.57	30.04		RecName: Full=Mitogen-activated protein kinase 7; Short=MAP kinase 7; AltName: Full=MAP kinase 6; AltName: Full=OsMAPK6
LOC_Os09g34150	-3.6635	4.54e-66	1.53e-61	yes	down	80.61	6.73	65	86.32	90.51	7.33	8.01	4.85		RecName: Full=Disease resistance protein RPP13; AltName: Full=Resistance to Peronospora parasitica protein 13
LOC_Os02g51710	-2.5639	9.07e-64	3.07e-59	yes	down	392.68	70.8333	372.8	365.46	439.78	74.85	74.62	63.03		_
LOC_Os12g42280	-5.06467	1.98e-62	6.69e-58	yes	down	13.53	0.433333	17.48	12.97	10.14	0.4	0.42	0.48		RecName: Full=9-cis-epoxycarotenoid dioxygenase 1, chloroplastic; AltName: Full=Protein VIVIPAROUS14; Short=VP-14; Flags: Precursor
LOC_Os09g33580	-3.87482	2.6e-62	8.8e-58	yes	down	36.62	2.67	43.32	35.44	31.1	3.15	2.24	2.62		RecName: Full=Transcription factor bHLH137; AltName: Full=Basic helix-loop-helix protein 137; Short=AtbHLH137; Short=bHLH 137; AltName: Full=Transcription factor E
LOC_Os09g36200	-3.42854	5.99e-62	2.03e-57	yes	down	65.5633	6.44667	64.47	53.03	79.19	5.18	6.28	7.88		RecName: Full=Protein STAY-GREEN, chloroplastic; AltName: Full=Protein STAYGREEN; Flags: Precursor
LOC_Os12g03040	-5.00156	1.22e-61	4.13e-57	yes	down	69.75	2.35333	95.69	53.01	60.55	1.72	1.94	3.4		RecName: Full=NAC transcription factor NAM-A1; Short=TtNAM-A1
LOC_Os07g43160	-4.30499	2.73e-61	9.22e-57	yes	down	95.0133	5.17667	114.99	101.38	68.67	4.5	6.81	4.22		RecName: Full=Probable trehalose-phosphate phosphatase 3; Short=OsTPP3; AltName: Full=Trehalose 6-phosphate phosphatase
LOC_Os07g38130	-2.07314	7.85e-61	2.65e-56	yes	down	1237.25	313.42	1257	1172.12	1282.62	320.89	322.47	296.9		RecName: Full=Polygalacturonase inhibitor 1; AltName: Full=Floral organ regulator 1; AltName: Full=Polygalacturonase-inhibiting protein 1; Short=PGIP-1; Flags: Pre
LOC_Os08g38210	-2.16807	1.41e-59	4.78e-55	yes	down	128.673	31.0433	112.48	137.5	136.04	30.61	33.59	28.93		RecName: Full=Transcription factor BIM1; AltName: Full=BES1-interacting Myc-like protein 1; AltName: Full=Basic helix-loop-helix protein 46; Short=AtbHLH46; Short=
LOC_Os02g52780	-3.70684	1.9e-59	6.43e-55	yes	down	50.2833	3.97667	44.52	63.77	42.56	3.07	3.94	4.92		RecName: Full=ABSCISIC ACID-INSENSITIVE 5-like protein 7; AltName: Full=ABA-responsive element-binding protein 2; AltName: Full=Abscisic acid responsive elements-b
LOC_Os12g39310	-4.79052	2.35e-59	7.94e-55	yes	down	51.7967	1.99333	52.58	50.54	52.27	2.14	2.85	0.99		RecName: Full=Cytochrome P450 81D11
LOC_Os03g60260	-2.9981	2.61e-59	8.83e-55	yes	down	38.49	5.09	43.73	33.92	37.82	4.91	5.28	5.08		_
LOC_Os02g01590	-3.28866	3.4e-58	1.15e-53	yes	down	152.14	16.6333	183.38	156.19	116.85	17.42	16.83	15.65		RecName: Full=Beta-fructofuranosidase 1; AltName: Full=Invertase 1; AltName: Full=Sucrose 1; Flags: Precursor
LOC_Os07g08750	-3.46475	3.43e-58	1.16e-53	yes	down	89.88	11.55	102.19	83.76	83.69	18.81	9.71	6.13		RecName: Full=Probable serine/threonine-protein kinase WNK3; Short=OsWNK3; AltName: Full=Protein kinase with no lysine 3
LOC_Os09g04160	-2.42278	1.38e-57	4.66e-53	yes	down	32.2067	6.33333	28.26	34	34.36	5.87	6.78	6.35		_
LOC_Os04g59260	-3.6143	4.12e-57	1.39e-52	yes	down	141.457	12.3067	157.25	126.38	140.74	15.05	13.21	8.66		RecName: Full=Cationic peroxidase SPC4; Flags: Precursor
LOC_Os01g06590	-3.52722	4.75e-57	1.61e-52	yes	down	202.513	18.6033	236.39	177.88	193.27	17	24.04	14.77		RecName: Full=E3 ubiquitin-protein ligase MBR2; AltName: Full=HAL3-interacting protein 1 homolog; Short=AtHIP1; AltName: Full=MED25-binding RING-H2 protein 2; AltNa
LOC_Os06g34020	-4.61775	8.78e-57	2.97e-52	yes	down	17.1833	1.00667	16.82	21.81	12.92	1.42	1.14	0.46		RecName: Full=Glucan endo-1,3-beta-glucosidase 11; AltName: Full=(1-)3)-beta-glucan endohydrolase 11; Short=(1-)3)-beta-glucanase 11; AltName: Full=Beta-1,3-endogl
LOC_Os08g06110	-3.57657	2.11e-56	7.12e-52	yes	down	115.16	10.09	99.89	116.19	129.4	12.19	11.14	6.94		RecName: Full=Protein CCA1; AltName: Full=MYB-related transcription factor CCA1; AltName: Full=Protein CIRCADIAN CLOCK ASSOCIATED 1
LOC_Os02g39000	-3.42451	3.08e-56	1.04e-51	yes	down	55.55	5.50333	51.65	44.48	70.52	5.41	4.72	6.38		_
LOC_Os01g14630	-5.00078	7.37e-56	2.49e-51	yes	down	28.8567	0.97	31.24	24.41	30.92	1.57	0.79	0.55		RecName: Full=Heterodimeric geranylgeranyl pyrophosphate synthase large subunit 1, chloroplastic; Short=GGPP synthase 1; Short=GGPS1; AltName: Full=(2E,6E)-farnesy
LOC_Os03g55800	-2.95412	1.43e-55	4.85e-51	yes	down	216.907	29.4567	249.31	201.69	199.72	30.38	33.37	24.62		RecName: Full=Allene oxide synthase 1, chloroplastic; AltName: Full=Cytochrome P450 74A1; AltName: Full=Hydroperoxide dehydrase 1; Flags: Precursor
LOC_Os07g26630	-3.84494	1.7e-55	5.76e-51	yes	down	76.3167	5.7	94.18	80.21	54.56	5.57	6.48	5.05		RecName: Full=Aquaporin PIP2-4; AltName: Full=OsPIP2;4; AltName: Full=Plasma membrane intrinsic protein 2-4
LOC_Os02g41904	-3.77193	4.9e-55	1.66e-50	yes	down	209.053	16.5967	192.35	195.71	239.1	12.66	13.01	24.12		RecName: Full=Defensin-like protein P322; AltName: Full=Probable protease inhibitor P322; Flags: Precursor
LOC_Os01g17396	-4.29561	8.19e-55	2.77e-50	yes	down	12.96	0.7	12.75	12.85	13.28	0.4	0.74	0.96		_
LOC_Os03g30570	-2.14519	2.94e-54	9.94e-50	yes	down	81.6533	19.7133	79.86	81.48	83.62	17.76	19.21	22.17		RecName: Full=Ninja-family protein Os03g0419100
LOC_Os03g02460	-3.54983	3.13e-54	1.06e-49	yes	down	42.75	3.79333	51.56	31.55	45.14	3.88	3.88	3.62		RecName: Full=Short-chain dehydrogenase TIC 32, chloroplastic; AltName: Full=Translocon at the inner envelope membrane of chloroplasts 32; Short=AtTIC32
LOC_Os01g10040	-2.70552	7.11e-54	2.4e-49	yes	down	59.79	9.55667	62.96	52.02	64.39	10.26	9.73	8.68		RecName: Full=Cytochrome P450 90D2; AltName: Full=C6-oxidase
LOC_Os01g51290	-1.78548	2.79e-53	9.42e-49	yes	down	127.023	39.0033	127.47	127.9	125.7	38.74	39.74	38.53		RecName: Full=Receptor-like serine/threonine-protein kinase ALE2; AltName: Full=Protein ABNORMAL LEAF SHAPE 2; Flags: Precursor
LOC_Os07g42370	-2.87067	2.96e-53	1e-48	yes	down	1872.43	275.427	2262.14	1669.17	1685.98	247.67	311.92	266.69		RecName: Full=Protein TIFY 11B; AltName: Full=Jasmonate ZIM domain-containing protein 6
LOC_Os12g02720	-3.19185	3.17e-53	1.07e-48	yes	down	26.05	3.02667	23.84	29.37	24.94	3.18	2.47	3.43		RecName: Full=Protein LURP-one-related 8
LOC_Os05g37250	-4.3593	4.03e-53	1.36e-48	yes	down	76.35	3.96	79.81	74.93	74.31	3.12	6.18	2.58		RecName: Full=Cytochrome P450 94C1
LOC_Os10g36550	-1.90128	6.37e-53	2.15e-48	yes	down	302.787	87.2233	309.55	289.73	309.08	92.36	85.94	83.37		_
LOC_Os05g04470	-3.59459	1.45e-52	4.89e-48	yes	down	60.6833	5.37667	74.18	53.83	54.04	5.89	6.16	4.08		RecName: Full=Peroxidase 5; Flags: Precursor
LOC_Os02g26700	-2.20331	3.2e-52	1.08e-47	yes	down	1099.84	256.847	1071.5	972.59	1255.42	237.38	260.12	273.04		RecName: Full=Cation transport regulator-like protein 2
LOC_Os03g15000	-2.72702	9.02e-52	3.05e-47	yes	down	111.4	17.9667	131.61	100.29	102.3	17.56	19.49	16.85		RecName: Full=Probable E3 ubiquitin-protein ligase LOG2; AltName: Full=Protein LOSS OF GDU2; AltName: Full=RING finger protein 215
LOC_Os01g45550	-2.18007	1.78e-50	6.03e-46	yes	down	45.7833	10.7667	47.09	48.63	41.63	10.71	10.86	10.73		RecName: Full=Probable auxin efflux carrier component 3a; AltName: Full=OsPIN3a
LOC_Os08g04630	-3.14236	2.77e-50	9.38e-46	yes	down	64.0733	7.75	75.34	54.43	62.45	6.66	6.88	9.71		RecName: Full=External alternative NAD(P)H-ubiquinone oxidoreductase B2, mitochondrial; AltName: Full=External alternative NADH dehydrogenase NDB2; AltName: Full=NA
LOC_Os06g37080	-2.17204	3.62e-50	1.23e-45	yes	down	205.82	48.7133	226.28	187.1	204.08	46.12	49.26	50.76		RecName: Full=L-ascorbate oxidase; Short=ASO; Short=Ascorbase; Flags: Precursor
LOC_Os08g03310	-2.77609	4.1e-50	1.39e-45	yes	down	21.22	3.30333	24.33	20.24	19.09	3.46	3.11	3.34		RecName: Full=Zinc finger CCCH domain-containing protein 54; Short=OsC3H54
LOC_Os01g10110	-3.07898	4.6e-50	1.55e-45	yes	down	76.06	9.56667	79.65	65.83	82.7	9.96	11.52	7.22		RecName: Full=Cytokinin dehydrogenase 2; AltName: Full=Cytokinin oxidase 2; Short=OsCKX2; AltName: Full=QTL grain number 1a; Short=Gn1a; Flags: Precursor
LOC_Os06g36740	-2.29038	6.73e-50	2.27e-45	yes	down	122.88	26.7433	123.04	108.57	137.03	26.34	28.8	25.09		RecName: Full=Pollen-specific protein SF21
LOC_Os07g23640	-3.60375	9.57e-50	3.24e-45	yes	down	18.2933	1.6	15.97	19.3	19.61	1.37	1.42	2.01		RecName: Full=Protein TsetseEP; AltName: Full=EP-repeat protein; Flags: Precursor
LOC_Os03g16670	-2.24105	1.73e-49	5.83e-45	yes	down	564.173	127.193	567.77	528.79	595.96	122.07	145.68	113.83		_
LOC_Os01g40094	-2.60137	1.25e-48	4.22e-44	yes	down	204.76	35.83	175.32	246.79	192.17	32.7	32.72	42.07		RecName: Full=Probable protein phosphatase 2C 6; Short=OsPP2C06
LOC_Os04g41570	-2.29114	1.61e-48	5.44e-44	yes	down	206.457	44.85	192.33	185.16	241.88	44.68	47.94	41.93		RecName: Full=Transcription factor bHLH113; AltName: Full=Basic helix-loop-helix protein 113; Short=AtbHLH113; Short=bHLH 113; AltName: Full=Transcription factor E
LOC_Os01g03360	-2.4489	1.63e-48	5.51e-44	yes	down	1740.11	340.44	1914.09	1596.17	1710.06	391.81	316.24	313.27		RecName: Full=Bowman-Birk type bran trypsin inhibitor; AltName: Full=OSE727A; AltName: Full=Protein RBBI3-3; AltName: Full=RBTI; Flags: Precursor
LOC_Os12g35610	-3.55722	3.95e-48	1.34e-43	yes	down	8.25	0.743333	7.19	9.74	7.82	0.75	0.55	0.93		RecName: Full=Respiratory burst oxidase homolog protein B; AltName: Full=NADPH oxidase RBOHB; Short=OsrbohB
LOC_Os01g46350	-2.36036	4.24e-48	1.43e-43	yes	down	19.02	3.89667	19.41	19	18.65	4.14	3.47	4.08		RecName: Full=Protein trichome birefringence-like 38
LOC_Os12g39320	-2.43247	1.29e-46	4.36e-42	yes	down	16.0967	3.17667	16.31	16.75	15.23	3.44	3.16	2.93		RecName: Full=CSC1-like protein HYP1; AltName: Full=HYPOTHETICAL PROTEIN 1
LOC_Os06g48040	-2.15218	1.38e-46	4.67e-42	yes	down	40.77	9.75667	40.72	43.12	38.47	8.86	10.86	9.55		RecName: Full=Probable E3 ubiquitin-protein ligase HIP1; AltName: Full=HAL3-interacting protein 1; Short=OsHIP1; AltName: Full=RING-H2 finger HIP1
LOC_Os01g45700	-2.50604	2.34e-46	7.92e-42	yes	down	219.687	41.52	247.12	182.02	229.92	43.45	41.45	39.66		RecName: Full=Leucine-rich repeat extensin-like protein 3; Short=AtLRX3; Short=LRR/EXTENSIN3; AltName: Full=Cell wall hydroxyproline-rich glycoprotein; Flags: Precu
LOC_Os03g08320	-4.7875	2.5e-46	8.44e-42	yes	down	1094.18	41.63	1235.42	1004.96	1042.15	38.52	66.36	20.01		_
LOC_Os04g17100	-2.09889	4.94e-46	1.67e-41	yes	down	1119	277.847	1063.33	1155.44	1138.23	250.24	322.59	260.71		RecName: Full=Heavy metal-associated isoprenylated plant protein 26; Short=AtHIPP26; AltName: Full=Farnesylated protein 6; Short=AtFP6; Flags: Precursor
LOC_Os05g33820	-2.40487	5.25e-46	1.78e-41	yes	down	51.93	10.45	52.92	56.27	46.6	9.29	11.95	10.11		RecName: Full=Lipase; AltName: Full=Triacylglycerol lipase; Contains: RecName: Full=Lipase 86 kDa form; Contains: RecName: Full=Lipase 46 kDa form; Flags: Precursor
LOC_Os04g35430	-3.34163	5.41e-46	1.83e-41	yes	down	4.29333	0.45	4.4	4.33	4.15	0.35	0.43	0.57		RecName: Full=Chromodomain-helicase-DNA-binding protein Mi-2 homolog; AltName: Full=ATP-dependent helicase Mi-2; Short=dMi-2
LOC_Os04g15840	-2.48123	8.22e-46	2.78e-41	yes	down	68.62	13.1267	64.29	74.44	67.13	11.74	11.62	16.02		RecName: Full=Expansin-A1; AltName: Full=Alpha-expansin-1; AltName: Full=OsEXP1; AltName: Full=OsEXPA1; AltName: Full=OsaEXPa1.16; AltName: Full=RiExA; Flags: Prec
LOC_Os01g43760	-3.22898	1.06e-45	3.59e-41	yes	down	15.3933	1.71	14.88	13.12	18.18	1.62	1.46	2.05		RecName: Full=Cytochrome P450 72A15
LOC_Os07g38290	-2.36752	1.11e-45	3.74e-41	yes	down	63.52	12.61	63.46	59.82	67.28	10.52	13.47	13.84		RecName: Full=Mavicyanin
LOC_Os03g03450	-3.14326	3.14e-45	1.06e-40	yes	down	146.057	18.52	180.59	104.01	153.57	21.61	17.17	16.78		RecName: Full=Anthranilate phosphoribosyltransferase, chloroplastic; Flags: Precursor
LOC_Os05g50990	-2.18476	3.84e-45	1.3e-40	yes	down	50.98	11.9167	51.38	56.7	44.86	12.11	12.2	11.44		RecName: Full=Inactive TPR repeat-containing thioredoxin TTL3; AltName: Full=Tetratricopeptide repeat thioredoxin-like 3; AltName: Full=VH1-interacting TPR-containi
LOC_Os02g57160	-3.80457	4.96e-45	1.68e-40	yes	down	64.35	4.93333	76.75	61.16	55.14	3.25	4.43	7.12		RecName: Full=Uncharacterized protein sll0005
LOC_Os12g16620	-5.96699	6.88e-45	2.33e-40	yes	down	13.6733	0.236667	11.29	14.71	15.02	0.31	0.32	0.08		_
LOC_Os01g12840	-3.12833	8.85e-45	2.99e-40	yes	down	70.5533	8.57	84.53	66.42	60.71	8.98	10.12	6.61		_
LOC_Os02g17240	-2.97517	9.92e-45	3.35e-40	yes	down	64.3933	8.66333	51.59	68.85	72.74	10.24	6.36	9.39		RecName: Full=Rho guanine nucleotide exchange factor 8; Short=AtRopGEF8; AltName: Full=Rho of plants guanine nucleotide exchange factor 8
LOC_Os03g08070	-2.28078	1.01e-44	3.41e-40	yes	down	61.3267	11.3067	67.74	54.08	62.16	11.75	9.96	12.21		RecName: Full=Copper-transporting ATPase PAA2, chloroplastic; AltName: Full=Protein HEAVY METAL ATPASE 8; Flags: Precursor
LOC_Os07g37730	-4.18566	6.33e-44	2.14e-39	yes	down	68.1167	3.87667	59.97	39.73	104.65	4.09	3.93	3.61		RecName: Full=Internal alternative NAD(P)H-ubiquinone oxidoreductase A1, mitochondrial; AltName: Full=Internal alternative NADH dehydrogenase NDA1; AltName: Full=In
LOC_Os01g10890	-2.62239	7.28e-44	2.46e-39	yes	down	83.3833	14.8433	89.31	77.53	83.31	17.46	11.24	15.83		RecName: Full=CBL-interacting protein kinase 5; AltName: Full=OsCIPK05
LOC_Os05g43460	-3.05449	1.17e-43	3.94e-39	yes	down	26.11	3.36667	27.71	25.4	25.22	3.48	2.7	3.92		RecName: Full=Protein LURP-one-related 12
LOC_Os01g45670	-2.70038	1.27e-43	4.3e-39	yes	down	45.5267	7.36667	43.41	41.71	51.46	7.27	8.61	6.22		_
LOC_Os03g38540	-2.91715	4.81e-43	1.63e-38	yes	down	260.7	36.3167	312.21	231.98	237.91	39.67	41.53	27.75		_
LOC_Os07g42510	-3.52312	1.65e-42	5.58e-38	yes	down	25.9433	2.40667	27.61	20.72	29.5	2.42	3.09	1.71		RecName: Full=Ethylene-responsive transcription factor 1; AltName: Full=Ethylene-responsive element-binding factor 1; Short=EREBP-1; Short=OsEREBP1
LOC_Os03g05910	-4.0655	1.98e-42	6.69e-38	yes	down	30.3033	1.93667	23.37	22.3	45.24	2.11	1.69	2.01		RecName: Full=FAD-dependent urate hydroxylase
LOC_Os01g43480	-2.75065	3.1e-42	1.05e-37	yes	down	70.3	10.88	79	53.24	78.66	10.05	11.96	10.63		RecName: Full=Spastin
LOC_Os04g25440	-2.94703	3.46e-42	1.17e-37	yes	down	35.2	4.87667	41.34	28.72	35.54	4.11	4.58	5.94		RecName: Full=UDP-glycosyltransferase 85A2
LOC_Os03g28260	-4.23017	5.86e-42	1.98e-37	yes	down	94.8933	5.4	96.28	118.19	70.21	4.89	8.05	3.26		_
LOC_Os02g11070	-2.92195	7.22e-42	2.44e-37	yes	down	191.04	26.45	167.12	181.99	224.01	19.76	34.41	25.18		RecName: Full=3-ketoacyl-CoA synthase 11; Short=KCS-11; AltName: Full=Very long-chain fatty acid condensing enzyme 11; Short=VLCFA condensing enzyme 11
LOC_Os02g40700	-3.75249	8.92e-42	3.02e-37	yes	down	41.5567	3.31	44.47	37.88	42.32	2.63	2.28	5.02		_
LOC_Os01g56810	-4.1475	9.06e-42	3.06e-37	yes	down	65.41	3.96667	68.56	65.96	61.71	3.77	5.99	2.14		RecName: Full=Cytokinin dehydrogenase 5; AltName: Full=Cytokinin oxidase 5; Short=OsCKX5; Flags: Precursor
LOC_Os05g09020	-2.29904	1.35e-41	4.55e-37	yes	down	118.603	25.75	104.67	127.26	123.88	25.86	29.14	22.25		RecName: Full=Probable WRKY transcription factor 50; AltName: Full=WRKY DNA-binding protein 50
LOC_Os03g38970	-2.44888	1.38e-41	4.65e-37	yes	down	89.03	16.7933	104.81	79.02	83.26	15.67	17.62	17.09		RecName: Full=Paladin
LOC_Os06g51380	-2.9163	1.46e-41	4.95e-37	yes	down	49.7767	7.05333	47.23	37.77	64.33	6.6	7.52	7.04		RecName: Full=DNA-binding protein RHL1; AltName: Full=Protein ELONGATED HYPOCOTYL 7; AltName: Full=Protein ROOT HAIRLESS 1
LOC_Os03g22490	-1.71844	3.25e-41	1.1e-36	yes	down	179.363	58.1033	177.34	170.19	190.56	54.99	62.08	57.24		_
LOC_Os05g08750	-2.90685	3.91e-41	1.32e-36	yes	down	25.2	3.58	26.02	24.56	25.02	4.64	2.89	3.21		RecName: Full=Anthocyanidin 3-O-glucoside 5-O-glucosyltransferase 2; AltName: Full=UDP-glucose:anthocyanin 5-O-glucosyltransferase 3R6; Short=p3R6; Flags: Precursor
LOC_Os08g35740	-2.49725	5.69e-41	1.92e-36	yes	down	220.99	41.8767	264.6	187.77	210.6	39.44	46.2	39.99		RecName: Full=12-oxophytodienoate reductase 7; AltName: Full=12-oxophytodienoate-10,11-reductase 7; Short=OPDA-reductase 7; Short=OsOPR7
LOC_Os04g44354	-3.47807	7.72e-41	2.61e-36	yes	down	12.43	1.14	10.47	12.22	14.6	0.68	1.26	1.48		RecName: Full=UDP-glycosyltransferase 82A1
LOC_Os12g43720	-2.09729	2.16e-40	7.29e-36	yes	down	39.7867	9.98	43.53	38.12	37.71	10.15	9.71	10.08		RecName: Full=CSC1-like protein RXW8
LOC_Os07g32660	-3.45066	2.54e-40	8.59e-36	yes	down	34.6233	3.36667	31.39	37.63	34.85	2.81	2.29	5		RecName: Full=L-ascorbate oxidase homolog; Flags: Precursor
LOC_Os10g41760	-2.70165	2.58e-40	8.74e-36	yes	down	24.1567	10.2333	24.11	25.77	22.59	11.82	9.81	9.07		RecName: Full=Chlorophyllide a oxygenase, chloroplastic; Short=Chlorophyll a oxygenase; AltName: Full=Chlorophyll b synthase; Flags: Precursor
LOC_Os02g50900	-3.38206	2.72e-40	9.19e-36	yes	down	17.19	1.75667	19.25	14.02	18.3	1.92	2.02	1.33		_
LOC_Os03g59090	-2.67373	2.91e-40	9.86e-36	yes	down	30.3633	5.06	28.18	30.09	32.82	3.92	4.74	6.52		_
LOC_Os10g42430	-1.77736	6.12e-40	2.07e-35	yes	down	131.497	41.3233	138.79	125.32	130.38	39.12	46.33	38.52		RecName: Full=Transcription factor MYC2; Short=AtMYC2; AltName: Full=Basic helix-loop-helix protein 6; Short=AtbHLH6; Short=bHLH 6; AltName: Full=Protein JASMONATE
LOC_Os03g07870	-2.90186	7.65e-40	2.59e-35	yes	down	63.9967	9.17667	60.25	66.79	64.95	6.5	8.81	12.22		_
LOC_Os02g09450	-2.823	1.42e-39	4.79e-35	yes	down	19.9267	2.98667	18.05	17.52	24.21	3.28	2.3	3.38		RecName: Full=Probable glycerophosphoryl diester phosphodiesterase 2; Flags: Precursor
LOC_Os06g51360	-1.97384	2.53e-39	8.54e-35	yes	down	38.26	10.3333	38.16	36.73	39.89	8.9	10.5	11.6		RecName: Full=LysM and putative peptidoglycan-binding domain-containing protein 1
LOC_Os02g37690	-3.02578	2.73e-39	9.24e-35	yes	down	19.8867	2.6	20.1	19.35	20.21	2.69	3.29	1.82		RecName: Full=UDP-glycosyltransferase 91B1
LOC_Os05g29990	-3.08241	3.03e-39	1.02e-34	yes	down	239.97	30.8167	317.19	189.28	213.44	30.87	36.15	25.43		RecName: Full=UDP-glucuronic acid decarboxylase 4; AltName: Full=UDP-XYL synthase 4; AltName: Full=UDP-glucuronate decarboxylase 4; Short=UGD; Short=UXS-4
LOC_Os03g14010	-3.16956	3.15e-39	1.07e-34	yes	down	84.3367	10.01	77.75	87.54	87.72	7.84	7.58	14.61		_
LOC_Os05g01530	-3.68787	3.68e-39	1.24e-34	yes	down	31.0033	2.65333	32	29.66	31.35	2.88	1.59	3.49		_
LOC_Os04g10350	-2.31454	3.73e-39	1.26e-34	yes	down	60.3367	13.0367	69.09	55.12	56.8	11.8	14.22	13.09		RecName: Full=1-aminocyclopropane-1-carboxylate oxidase homolog 2
LOC_Os09g30438	-5.59334	3.85e-39	1.3e-34	yes	down	7.82333	0.17	6.75	8.46	8.26	0.06	0.22	0.23		_
LOC_Os04g49550	-2.46732	4.84e-39	1.64e-34	yes	down	49.85	9.60333	44.16	44.09	61.3	9.25	9.98	9.58		RecName: Full=RING-H2 finger protein ATL45; AltName: Full=RING-H2 zinc finger protein RHA3b
LOC_Os05g04680	-3.3397	7.42e-39	2.51e-34	yes	down	29.1233	3.07667	26.67	29.02	31.68	3.11	3.97	2.15		_
LOC_Os02g05830	-2.6548	1.33e-38	4.49e-34	yes	down	45.16	7.50333	33.26	51.73	50.49	7.15	7.21	8.15		RecName: Full=Ribulose bisphosphate carboxylase small chain, chloroplastic; Short=RuBisCO small subunit; Flags: Precursor
LOC_Os08g37874	-2.42038	1.61e-38	5.45e-34	yes	down	27.9333	5.50667	27.79	23.4	32.61	5.43	5.14	5.95		RecName: Full=Probable nitronate monooxygenase; AltName: Full=Nitroalkane oxidase
LOC_Os06g01760	-3.42548	2.09e-38	7.07e-34	yes	down	63.54	6.30667	63.47	82.84	44.31	4.49	7.04	7.39		_
LOC_Os02g51760	-2.32697	2.1e-38	7.1e-34	yes	down	155.263	32.8033	128.34	163.01	174.44	28.81	39.68	29.92		_
LOC_Os05g48300	-2.53374	7.72e-38	2.61e-33	yes	down	29.59	5.44333	29.26	25.18	34.33	6.08	4.88	5.37		RecName: Full=Probable purine permease 4; Short=AtPUP4
LOC_Os08g42960	-2.22448	8.47e-38	2.86e-33	yes	down	47.4933	10.72	54.32	39.56	48.6	10.47	10.76	10.93		RecName: Full=Ankyrin repeat-containing protein At5g02620
LOC_Os01g17390	-2.22114	9.48e-38	3.21e-33	yes	down	134.83	30.6733	125.83	121.53	157.13	34.28	25.55	32.19		RecName: Full=F-box protein At2g41170
LOC_Os12g38860	-2.40796	1.08e-37	3.65e-33	yes	down	97.6433	19.4833	87.2	90.89	114.84	22.77	15.51	20.17		RecName: Full=Probable serine/threonine-protein kinase At1g54610
LOC_Os07g46852	-2.87629	1.31e-37	4.43e-33	yes	down	41.2367	6.08333	52.11	33.34	38.26	6.1	6.23	5.92		RecName: Full=Short-chain dehydrogenase reductase 2a; Short=AtSDR2a
LOC_Os01g62760	-2.85718	2.32e-37	7.85e-33	yes	down	133.73	19.5633	126	151.24	123.95	12.97	22	23.72		RecName: Full=Probable protein phosphatase 2C 9; Short=OsPP2C09
LOC_Os01g14510	-5.48839	2.34e-37	7.91e-33	yes	down	8.59333	0.2	7.61	9.8	8.37	0.06	0.11	0.43		RecName: Full=Receptor-like serine/threonine-protein kinase At1g78530
LOC_Os11g39190	-2.14256	3.21e-37	1.08e-32	yes	down	11.8767	2.84667	10.54	13.22	11.87	2.76	3.11	2.67		_
LOC_Os10g25230	-4.17094	3.58e-37	1.21e-32	yes	down	51.7933	3.05	33.88	61.13	60.37	2.1	4.76	2.29		RecName: Full=Protein TIFY 3A; AltName: Full=Jasmonate ZIM domain-containing protein 11
LOC_Os03g05920	-2.39789	4.15e-37	1.4e-32	yes	down	37.8667	7.63333	35.68	33.13	44.79	8.58	7.66	6.66		RecName: Full=FAD-dependent urate hydroxylase
LOC_Os08g04560	-2.85366	4.56e-37	1.54e-32	yes	down	15.42	2.28667	16.48	14.74	15.04	2.01	1.82	3.03		RecName: Full=Tyrosine/DOPA decarboxylase 1; Includes: RecName: Full=DOPA decarboxylase; Short=DDC; Includes: RecName: Full=Tyrosine decarboxylase
LOC_Os03g21890	-1.44829	5.59e-37	1.89e-32	yes	down	101.863	38.56	97.79	98.67	109.13	37.31	39.5	38.87		RecName: Full=Putative potassium transporter 8; AltName: Full=OsHAK8
LOC_Os01g46800	-2.97245	6.69e-37	2.26e-32	yes	down	40.9367	5.15	28.56	50.38	43.87	4.12	4.58	6.75		RecName: Full=Probable WRKY transcription factor 41; AltName: Full=WRKY DNA-binding protein 41
LOC_Os08g37840	-3.39235	7.96e-37	2.69e-32	yes	down	239.857	24.2033	189.34	233.59	296.64	23.04	33.73	15.84		_
LOC_Os03g51650	-2.42113	8.42e-37	2.85e-32	yes	down	371.01	73.63	426.59	308.02	378.42	72.96	84.41	63.52		_
LOC_Os07g02460	-3.9579	8.87e-37	3e-32	yes	down	30.1933	2.08667	32.06	30.09	28.43	1.28	1.76	3.22		_
LOC_Os03g05900	-4.67547	1.38e-36	4.68e-32	yes	down	15.8133	0.663333	20.77	11.49	15.18	0.66	1.02	0.31		RecName: Full=Zeaxanthin epoxidase, chloroplastic; Flags: Precursor
LOC_Os01g73110	-2.86822	1.7e-36	5.75e-32	yes	down	56.9067	7.27333	42.11	55.55	73.06	6.65	8.09	7.08		_
LOC_Os01g67540	-3.12956	1.71e-36	5.77e-32	yes	down	10.2567	1.29	11.67	9.46	9.64	1.52	1.38	0.97		RecName: Full=4-coumarate--CoA ligase-like 6
LOC_Os02g40260	-5.36384	2.15e-36	7.28e-32	yes	down	7.71	0.2	5.93	7.99	9.21	0.22	0.06	0.32		RecName: Full=Uncharacterized protein At4g06744; Flags: Precursor
LOC_Os09g27820	-4.0746	3.62e-36	1.22e-31	yes	down	50.0867	3.16333	42.84	55.33	52.09	2.22	5.31	1.96		RecName: Full=1-aminocyclopropane-1-carboxylate oxidase 1; Short=ACC oxidase 1; AltName: Full=Ethylene-forming enzyme; Short=EFE
LOC_Os09g09290	-2.37695	3.75e-36	1.27e-31	yes	down	5.28	1.07333	5.86	5.24	4.74	1.04	1	1.18		_
LOC_Os03g51580	-1.60926	3.99e-36	1.35e-31	yes	down	67.81	23.27	61.3	69.53	72.6	24.09	23.06	22.66		RecName: Full=Transcription factor bHLH18; AltName: Full=Basic helix-loop-helix protein 18; Short=AtbHLH18; Short=bHLH 18; AltName: Full=Transcription factor EN 2
LOC_Os01g54210	-2.73156	4.66e-36	1.57e-31	yes	down	46.52	7.46667	51.32	39.88	48.36	6.96	9.48	5.96		RecName: Full=GATA transcription factor 12
LOC_Os06g14030	-4.14473	5.94e-36	2.01e-31	yes	down	22.6867	1.36667	21.52	34.39	12.15	1.41	1.51	1.18		RecName: Full=Potassium channel KOR1; AltName: Full=K(+) outward-rectifying channel 1
LOC_Os08g37345	-3.1285	7.81e-36	2.64e-31	yes	down	15.0933	1.83	16.56	13.86	14.86	1.95	2.05	1.49		RecName: Full=Putative DNA-binding protein ESCAROLA
LOC_Os01g64360	-3.21071	8.07e-36	2.73e-31	yes	down	80.2133	9.20333	57.2	96.42	87.02	7.54	12.46	7.61		RecName: Full=Transcription factor DIVARICATA
LOC_Os08g34900	-2.41748	1.03e-35	3.47e-31	yes	down	68.5	13.6033	66.65	67.3	71.55	14.91	15.76	10.14		RecName: Full=Probable pectinesterase/pectinesterase inhibitor 34; Includes: RecName: Full=Pectinesterase inhibitor 34; AltName: Full=Pectin methylesterase inhibit
LOC_Os03g10140	-1.91947	1.08e-35	3.64e-31	yes	down	71.8333	20.3033	69.08	64.84	81.58	19.06	22.19	19.66		RecName: Full=Zinc finger protein MAGPIE
LOC_Os05g06720	-2.69058	1.22e-35	4.11e-31	yes	down	53.62	8.29333	60.05	50.23	50.58	6.92	10.52	7.44		RecName: Full=GDSL esterase/lipase At1g09390; AltName: Full=Extracellular lipase At1g09390; Flags: Precursor
LOC_Os08g02850	-2.18732	1.33e-35	4.5e-31	yes	down	56.6	13.0367	63.26	57.73	48.81	13.08	14.32	11.71		RecName: Full=UPF0392 protein Os08g0121900
LOC_Os02g51730	-4.01919	1.35e-35	4.57e-31	yes	down	5.98333	0.393333	6.91	5.4	5.64	0.33	0.3	0.55		RecName: Full=Inactive TPR repeat-containing thioredoxin TTL3; AltName: Full=Tetratricopeptide repeat thioredoxin-like 3; AltName: Full=VH1-interacting TPR-containi
LOC_Os02g40840	-2.58942	2.53e-35	8.56e-31	yes	down	39.7933	7.06667	45.93	34.14	39.31	5.4	8.11	7.69		RecName: Full=Long-chain-alcohol oxidase FAO2; AltName: Full=Long-chain fatty alcohol oxidase 2
LOC_Os05g49420	-2.23375	2.84e-35	9.59e-31	yes	down	54.5167	12.3767	61.36	54.11	48.08	11.54	14.1	11.49		RecName: Full=Common plant regulatory factor 1; Short=CPRF-1
LOC_Os02g52230	-2.24122	3.56e-35	1.2e-30	yes	down	222.75	50.3333	257.72	228.05	182.48	45.78	51.87	53.35		RecName: Full=Transport inhibitor response 1-like protein; Short=TIR1-like protein
LOC_Os03g01260	-3.98155	3.79e-35	1.28e-30	yes	down	116.053	7.89333	109.12	126.57	112.47	4.03	6.51	13.14		RecName: Full=Expansin-B8; AltName: Full=Beta-expansin-8; AltName: Full=OsEXPB8; AltName: Full=OsaEXPb1.11; Flags: Precursor
LOC_Os06g40890	-2.88846	5.92e-35	2e-30	yes	down	23.42	3.36667	21.12	25.25	23.89	3.77	2.25	4.08		RecName: Full=Exopolygalacturonase; Short=ExoPG; AltName: Full=Galacturan 1,4-alpha-galacturonidase; AltName: Full=Pectinase; Flags: Precursor
LOC_Os05g30010	-1.82931	6.72e-35	2.27e-30	yes	down	16.7233	6.31333	16.58	17.99	15.6	5.99	5.32	7.63		_
LOC_Os12g25690	-2.10369	7.66e-35	2.59e-30	yes	down	131.913	32.5633	153.72	120.2	121.82	33.08	30.26	34.35		RecName: Full=UDP-glucose 6-dehydrogenase 4; Short=UDP-Glc dehydrogenase 4; Short=UDP-GlcDH 4; Short=UDPGDH 4; AltName: Full=Os-UGD4
LOC_Os02g46460	-2.74435	7.98e-35	2.7e-30	yes	down	29.16	4.43	29.84	25.05	32.59	4.44	5.45	3.4		RecName: Full=Protein NRT1/ PTR FAMILY 7.2; Short=AtNPF7.2; AltName: Full=Nitrate transporter 1.8
LOC_Os04g58200	-2.90072	1.05e-34	3.55e-30	yes	down	104.89	14.91	87.46	114.36	112.85	11.54	11.98	21.21		RecName: Full=Protochlorophyllide reductase A, chloroplastic; Short=PCR A; AltName: Full=NADPH-protochlorophyllide oxidoreductase A; Short=POR A; Flags: Precursor
LOC_Os10g27480	-2.564	1.18e-34	4e-30	yes	down	87.6267	15.7267	82.39	84.51	95.98	17.76	10.97	18.45		_
LOC_Os03g16700	-2.11817	1.52e-34	5.13e-30	yes	down	75.56	18.15	82.7	76.82	67.16	15.91	20.78	17.76		RecName: Full=Telomere repeat-binding protein 5; AltName: Full=Protein TRF-LIKE 2
LOC_Os02g55820	-4.17214	1.95e-34	6.59e-30	yes	down	8.46333	0.55	6.32	8.03	11.04	0.73	0.29	0.63		RecName: Full=Citrate synthase, mitochondrial; Flags: Precursor
LOC_Os03g30300	-2.10004	2.35e-34	7.96e-30	yes	down	60.8467	16.4933	58.31	53.97	70.26	15.04	14.99	19.45		RecName: Full=Probable 6-phosphogluconolactonase 1; Short=6PGL 1
LOC_Os07g34130	-3.15381	3.27e-34	1.1e-29	yes	down	10.98	1.30667	8.58	12.24	12.12	1.6	0.92	1.4		RecName: Full=TBC1 domain family member 25
LOC_Os01g48410	-2.91845	4.33e-34	1.46e-29	yes	down	104.81	14.6867	92.99	97.13	124.31	18.4	9.58	16.08		RecName: Full=Rho guanine nucleotide exchange factor 8; Short=AtRopGEF8; AltName: Full=Rho of plants guanine nucleotide exchange factor 8
LOC_Os02g25900	-2.04767	6.31e-34	2.13e-29	yes	down	49.2267	12.6367	48.04	48.88	50.76	13.82	10.05	14.04		RecName: Full=Disease resistance protein RPM1; AltName: Full=Resistance to Pseudomonas syringae protein 3
LOC_Os02g51680	-2.5678	8.58e-34	2.9e-29	yes	down	186.5	33.6233	213.95	186.82	158.73	31.84	41.77	27.26		RecName: Full=Probable trehalose-phosphate phosphatase 4; Short=OsTPP4; AltName: Full=Trehalose 6-phosphate phosphatase
LOC_Os01g42520	-1.68479	8.97e-34	3.03e-29	yes	down	588.8	195.243	625.62	597.18	543.6	193.82	205.36	186.55		_
LOC_Os01g50750	-4.32255	2.38e-33	8.03e-29	yes	down	6.40667	0.34	7.24	5.76	6.22	0.3	0.31	0.41		RecName: Full=E3 ubiquitin-protein ligase RNF38; AltName: Full=RING finger protein 38
LOC_Os01g57420	-2.05505	2.85e-33	9.65e-29	yes	down	53.13	12.8667	45.49	51.18	62.72	14.84	10.98	12.78		RecName: Full=Diacylglycerol kinase 5; Short=AtDGK5; Short=DAG kinase 5; AltName: Full=Diglyceride kinase 5; Short=DGK 5
LOC_Os08g44020	-2.87873	3.34e-33	1.13e-28	yes	down	293.813	42.82	331.91	298.98	250.55	49.13	50.96	28.37		_
LOC_Os02g21700	-3.01715	3.38e-33	1.14e-28	yes	down	19.1333	2.53667	23.73	17.03	16.64	2.68	2.77	2.16		RecName: Full=Mitogen-activated protein kinase kinase kinase 2; AltName: Full=Arabidopsis NPK1-related protein kinase 2
LOC_Os11g23220	-2.99644	4e-33	1.35e-28	yes	down	24.6	3.28	19.57	20.98	33.25	3.45	2.84	3.55		RecName: Full=Myosin-3; AltName: Full=Myosin VIII A; Short=AtVIIIA
LOC_Os05g51750	-2.37601	4.82e-33	1.63e-28	yes	down	18.2633	2.99333	16.85	18.16	19.78	2.73	2	4.25		_
LOC_Os04g49954	-2.68337	5.63e-33	1.9e-28	yes	down	102.283	16.5533	120.06	84.66	102.13	17.04	18.95	13.67		_
LOC_Os03g18070	-1.86138	6.84e-33	2.31e-28	yes	down	118.94	34.96	132.2	107.9	116.72	32.92	33.71	38.25		RecName: Full=Omega-3 fatty acid desaturase, chloroplastic; Flags: Precursor
LOC_Os02g55970	-2.63212	6.85e-33	2.32e-28	yes	down	26.6467	4.56667	28.03	23.09	28.82	4.99	5.4	3.31		RecName: Full=Putative clathrin assembly protein At5g35200
LOC_Os05g01120	-2.2049	1.22e-32	4.11e-28	yes	down	19.33	4.47333	20.14	21.19	16.66	4.38	4.77	4.27		_
LOC_Os04g47720	-2.86295	1.22e-32	4.12e-28	yes	down	16.8633	2.46	16.56	12.64	21.39	2.47	2.26	2.65		RecName: Full=Putative cis-zeatin O-glucosyltransferase
LOC_Os12g01510	-2.57927	1.25e-32	4.22e-28	yes	down	35.0167	6.24667	34.59	36.29	34.17	6.93	7.45	4.36		RecName: Full=Probable inactive receptor-like protein kinase At3g56050; Flags: Precursor
LOC_Os10g33040	-2.39525	1.45e-32	4.91e-28	yes	down	17.7333	3.58667	18.51	17.14	17.55	3.38	2.79	4.59		RecName: Full=Probable leucine-rich repeat receptor-like protein kinase At1g35710; Flags: Precursor
LOC_Os01g09320	-1.60413	2.06e-32	6.98e-28	yes	down	175.253	60.9333	169.79	168.13	187.84	55.47	59.02	68.31		RecName: Full=NADP-dependent malic enzyme, chloroplastic; Short=NADP-ME; Flags: Precursor
LOC_Os03g11734	-3.5034	2.54e-32	8.59e-28	yes	down	74.31	6.94333	75.27	79.71	67.95	9.97	7.1	3.76		RecName: Full=MATE efflux family protein FRD3; AltName: Full=MATE citrate transporter; AltName: Full=Protein DTX43; AltName: Full=Protein FERRIC REDUCTASE DEFECTIVE
LOC_Os03g13820	-2.41005	3.4e-32	1.15e-27	yes	down	36.7733	7.24	43.66	31.68	34.98	6.59	8.22	6.91		RecName: Full=Proline-rich receptor-like protein kinase PERK13; AltName: Full=Proline-rich extensin-like receptor kinase 13; Short=AtPERK13; AltName: Full=Protein
LOC_Os06g42020	-2.07424	3.64e-32	1.23e-27	yes	down	31.1267	7.88	32.47	32.74	28.17	6.54	8.46	8.64		RecName: Full=Probable mannan synthase 9; AltName: Full=Cellulose synthase-like protein A9; AltName: Full=OsCslA9
LOC_Os02g13850	-1.5661	3.7e-32	1.25e-27	yes	down	54.2933	19.4967	53.7	50.95	58.23	19.96	20.34	18.19		RecName: Full=Probable LRR receptor-like serine/threonine-protein kinase At1g53440; Flags: Precursor
LOC_Os07g41280	-2.00174	3.8e-32	1.29e-27	yes	down	73.35	19.48	80.21	64.6	75.24	21.39	19.39	17.66		RecName: Full=Probable 6-phosphogluconolactonase 2; Short=6PGL 2
LOC_Os06g25010	-4.95008	4.28e-32	1.45e-27	yes	down	22.4767	0.77	16.65	22.35	28.43	0.57	1.47	0.27		RecName: Full=Xylanase inhibitor protein 1; Short=XIP-1; Short=XIP-I; AltName: Full=Class III chitinase homolog; Flags: Precursor
LOC_Os01g03340	-2.22429	4.41e-32	1.49e-27	yes	down	1828.38	417.907	2096.78	1627.98	1760.38	486.7	412.91	354.11		RecName: Full=Bowman-Birk type bran trypsin inhibitor; AltName: Full=OSE727A; AltName: Full=Protein RBBI3-3; AltName: Full=RBTI; Flags: Precursor
LOC_Os06g45090	-2.01497	5.68e-32	1.92e-27	yes	down	60.61	15.71	54.79	54.14	72.9	14.65	17.36	15.12		_
LOC_Os01g33300	-2.89045	6.33e-32	2.14e-27	yes	down	21.78	3.13	21.72	20.67	22.95	3.2	2.06	4.13		RecName: Full=Exopolygalacturonase; Short=ExoPG; AltName: Full=Galacturan 1,4-alpha-galacturonidase; AltName: Full=Pectinase; Flags: Precursor
LOC_Os12g31860	-2.06042	7.02e-32	2.37e-27	yes	down	65.3067	17.0267	74.99	65.76	55.17	17.52	16.12	17.44		RecName: Full=Ureide permease 5; Short=AtUPS5
LOC_Os04g44530	-2.66971	7.73e-32	2.62e-27	yes	down	117.493	20.24	155.95	98.48	98.05	18.97	23.16	18.59		_
LOC_Os01g57030	-3.7567	9.65e-32	3.27e-27	yes	down	42.02	3.39	48.92	46.14	31	2.81	3.03	4.33		_
LOC_Os01g12520	-1.85235	9.97e-32	3.37e-27	yes	down	167.597	50.14	163.56	154.85	184.38	43.82	48	58.6		RecName: Full=Mitochondrial arginine transporter BAC2; AltName: Full=Mitochondrial basic amino acid carrier 2; Short=AtMBAC2
LOC_Os07g04990	-3.30881	1.3e-31	4.41e-27	yes	down	125.553	13.6667	155.05	78.71	142.9	10.34	12.26	18.4		RecName: Full=Uncharacterized oxidoreductase At1g06690, chloroplastic; Flags: Precursor
LOC_Os01g72360	-4.79425	1.41e-31	4.77e-27	yes	down	44.24	1.69	30.04	44.39	58.29	0.74	3.19	1.14		_
LOC_Os09g26780	-2.59854	1.64e-31	5.54e-27	yes	down	279.263	49.46	359.38	206.24	272.17	44.9	53.58	49.9		RecName: Full=Protein TIFY 10A; AltName: Full=Jasmonate ZIM domain-containing protein 1
LOC_Os10g35644	-2.42427	1.91e-31	6.47e-27	yes	down	26.52	5.32333	23.62	27.14	28.8	5.22	6.5	4.25		_
LOC_Os08g42750	-2.79516	2.2e-31	7.44e-27	yes	down	33.7733	5.28333	30.42	29.38	41.52	5.46	3.7	6.69		RecName: Full=Calcium-dependent protein kinase 13
LOC_Os08g32060	-4.03231	3.24e-31	1.1e-26	yes	down	4.23	0.27	3.12	4.95	4.62	0.28	0.2	0.33		RecName: Full=U-box domain-containing protein 19; AltName: Full=Plant U-box protein 19
LOC_Os05g03040	-3.05053	7.34e-31	2.48e-26	yes	down	92.1233	11.94	131.34	71.65	73.38	13.26	12.13	10.43		RecName: Full=Floral homeotic protein APETALA 2
LOC_Os05g48650	-3.19444	7.75e-31	2.62e-26	yes	down	22.5967	2.64	18.02	23.55	26.22	2.96	3.09	1.87		_
LOC_Os02g07900	-2.5469	8.72e-31	2.95e-26	yes	down	126.877	23.0533	115.7	124.13	140.8	26.35	15.43	27.38		RecName: Full=Putative clathrin assembly protein At5g57200
LOC_Os03g08110	-1.88615	8.79e-31	2.97e-26	yes	down	36.5033	10.48	37.5	30.66	41.35	10.38	11	10.06		_
LOC_Os03g50030	-2.10924	8.9e-31	3.01e-26	yes	down	96.44	23.7933	78.77	88.62	121.93	24.47	23.1	23.81		RecName: Full=Phospholipase A2 homolog 3; Flags: Precursor
LOC_Os02g54590	-2.76602	1.8e-30	6.08e-26	yes	down	4.99	0.783333	5.1	5.16	4.71	0.95	0.66	0.74		RecName: Full=U-box domain-containing protein 52; AltName: Full=Plant U-box protein 52; Includes: RecName: Full=E3 ubiquitin ligase; Includes: RecName: Full=Serine
LOC_Os03g64070	-2.53872	2.02e-30	6.83e-26	yes	down	35.7867	6.59	42.52	32.05	32.79	6.31	7.87	5.59		RecName: Full=Probable cytokinin riboside 5'-monophosphate phosphoribohydrolase LOGL5; AltName: Full=Protein LONELY GUY-like 5
LOC_Os12g07700	-3.21621	2.77e-30	9.38e-26	yes	down	74.2633	8.50333	56.68	73.54	92.57	11.22	5.14	9.15		RecName: Full=NifU-like protein 1, chloroplastic; AltName: Full=OsNifu1; Flags: Precursor
LOC_Os07g25690	-2.62529	2.9e-30	9.8e-26	yes	down	425.377	73.72	462.76	400	413.37	98.24	67.91	55.01		_
LOC_Os08g41320	-2.29126	3.73e-30	1.26e-25	yes	down	140.027	30.49	152.89	150.9	116.29	34.17	32.73	24.57		RecName: Full=Transcription factor bHLH78; AltName: Full=Basic helix-loop-helix protein 78; Short=AtbHLH78; Short=bHLH 78; AltName: Full=Transcription factor EN 86
LOC_Os06g46460	-5.81712	3.88e-30	1.31e-25	yes	down	30.0367	0.576667	36.49	30.59	23.03	0.46	0.85	0.42		_
LOC_Os04g51660	-4.29969	4.4e-30	1.49e-25	yes	down	18.8467	1.02	19.22	19.12	18.2	0.45	0.7	1.91		RecName: Full=Phenolic glucoside malonyltransferase 1
LOC_Os06g13720	-2.43711	4.91e-30	1.66e-25	yes	down	12.9	2.54333	14.16	11.81	12.73	2.38	2.29	2.96		RecName: Full=Pyruvate dehydrogenase E1 component subunit alpha-2, mitochondrial; Short=PDHE1-A; Flags: Precursor
LOC_Os03g57880	-1.59054	5.11e-30	1.73e-25	yes	down	63.8867	22.6133	62.2	65.88	63.58	21.39	25.33	21.12		RecName: Full=Glucan endo-1,3-beta-glucosidase 8; AltName: Full=(1-)3)-beta-glucan endohydrolase 8; Short=(1-)3)-beta-glucanase 8; AltName: Full=Beta-1,3-endogluca
LOC_Os08g36860	-2.80499	5.56e-30	1.88e-25	yes	down	59.1133	9.03	78.7	46.62	52.02	9.89	9.73	7.47		RecName: Full=Abscisic acid 8'-hydroxylase 2; Short=ABA 8'-hydroxylase 2; AltName: Full=Cytochrome P450 707A6; AltName: Full=OsABA8ox2
LOC_Os02g42970	-5.33173	6.7e-30	2.26e-25	yes	down	6.43	0.256667	8.62	6.54	4.13	0.1	0.3	0.37		RecName: Full=NAC domain-containing protein 7; Short=ANAC007; AltName: Full=Protein EMBRYO DEFECTIVE 2749; AltName: Full=Protein VASCULAR RELATED NAC-DOMAIN 4
LOC_Os04g36040	-3.27528	6.72e-30	2.27e-25	yes	down	12.21	1.34667	15.71	12.43	8.49	1.28	1.61	1.15		RecName: Full=Protein NRT1/ PTR FAMILY 4.4; Short=AtNPF4.4; AltName: Full=Nitrate transporter 1.13
LOC_Os05g07010	-7.95945	7.19e-30	2.43e-25	yes	down	119.95	0.503333	111.89	132.97	114.99	0.24	1.09	0.18		RecName: Full=Protein REVEILLE 8; AltName: Full=MYB-like transcription factor; AltName: Full=Protein LHY-CCA1-like 5
LOC_Os07g09050	-2.54329	7.72e-30	2.61e-25	yes	down	8.18	1.49667	8.91	7.11	8.52	1.53	1.25	1.71		RecName: Full=Probable glycosyltransferase At5g03795
LOC_Os03g61960	-2.97023	8.88e-30	3e-25	yes	down	915.727	126.35	1163.29	746.93	836.96	101.14	98	179.91		RecName: Full=Ferredoxin-3, chloroplastic; AltName: Full=Ferredoxin III; Short=Fd III; Flags: Precursor
LOC_Os06g03610	-2.61813	9.07e-30	3.07e-25	yes	down	58.4567	10.1	54.92	53.63	66.82	11.72	6.63	11.95		RecName: Full=Probable receptor-like protein kinase At4g39110; Flags: Precursor
LOC_Os01g51430	-1.87575	1.01e-29	3.41e-25	yes	down	32.9367	9.71667	35.21	30.57	33.03	9.26	9.82	10.07		RecName: Full=Protein REVERSION-TO-ETHYLENE SENSITIVITY1
LOC_Os06g43870	-1.61549	1.11e-29	3.74e-25	yes	down	36.7233	12.7667	34.67	38.67	36.83	13.02	12.92	12.36		_
LOC_Os12g12860	-2.5994	1.12e-29	3.79e-25	yes	down	73.4033	13.56	67.3	69.35	83.56	15.19	9.37	16.12		RecName: Full=Calcium-dependent protein kinase 32
LOC_Os03g19270	-2.88225	1.18e-29	3.99e-25	yes	down	15.2067	2.15333	13.08	17.8	14.74	2.06	2.44	1.96		_
LOC_Os04g59120	-2.69719	1.21e-29	4.09e-25	yes	down	80.74	13.3267	103.53	76.76	61.93	15	13.99	10.99		RecName: Full=WAT1-related protein At5g07050
LOC_Os02g35300	-2.77396	2.25e-29	7.6e-25	yes	down	24.4933	3.7	20.94	20.4	32.14	4.08	2.65	4.37		RecName: Full=Probable serine/threonine-protein kinase At1g54610
LOC_Os03g37120	-3.06705	2.28e-29	7.71e-25	yes	down	20.3867	2.57333	15.81	18.34	27.01	2.42	1.79	3.51		RecName: Full=Proline-rich receptor-like protein kinase PERK12; AltName: Full=Proline-rich extensin-like receptor kinase 12; Short=AtPERK12; AltName: Full=Protein
LOC_Os02g55649	-3.76531	2.33e-29	7.89e-25	yes	down	21.58	1.71333	23.44	16.01	25.29	1.96	1.55	1.63		RecName: Full=Uncharacterized protein OsI_009113; AltName: Full=Unknown protein AN04 from 2D-PAGE of anther
LOC_Os04g52730	-1.92744	3.58e-29	1.21e-24	yes	down	120.92	33.9367	139.12	109.11	114.53	32.22	37.68	31.91		RecName: Full=Probable UDP-arabinose 4-epimerase 2; AltName: Full=OsUEL-2; AltName: Full=UDP-D-xylose 4-epimerase 2; AltName: Full=UDP-galactose 4-epimerase-like p
LOC_Os02g48470	-2.19509	3.73e-29	1.26e-24	yes	down	57.8133	13.7167	56.89	54	62.55	13.56	12.99	14.6		_
LOC_Os02g26210	-3.47768	3.93e-29	1.33e-24	yes	down	9.1	0.873333	9.61	7.54	10.15	0.75	0.9	0.97		RecName: Full=Flowering-promoting factor 1-like protein 3; AltName: Full=FPF1-like protein 3
LOC_Os04g45020	-2.72766	4.01e-29	1.36e-24	yes	down	10.9167	1.75333	10.31	9.29	13.15	1.51	1.71	2.04		RecName: Full=Transcription factor LAF1; AltName: Full=Myb-related protein 18; Short=AtMYB18; AltName: Full=Protein LONG AFTER FAR-RED LIGHT 1
LOC_Os03g13860	-2.32926	4.48e-29	1.52e-24	yes	down	30.2367	6.44667	34.25	30.53	25.93	7.51	6.11	5.72		RecName: Full=Uncharacterized GTP-binding protein At5g64813
LOC_Os03g61530	-2.89595	5.49e-29	1.86e-24	yes	down	53.8967	7.76333	45.15	46.87	69.67	8.66	5.5	9.13		_
LOC_Os02g05670	-3.06197	5.9e-29	1.99e-24	yes	down	419.37	52.9933	329.76	375.6	552.75	61.54	32.22	65.22		_
LOC_Os12g42910	-2.6716	6.11e-29	2.06e-24	yes	down	15.3	2.56667	18.98	11.84	15.08	2.39	2.71	2.6		RecName: Full=Cation/calcium exchanger 1; Short=AtCCX1; AltName: Full=Protein CATION EXCHANGER 7
LOC_Os05g46530	-3.00176	6.14e-29	2.08e-24	yes	down	963.66	127.627	727.57	837.38	1326.03	130.24	85.95	166.69		_
LOC_Os05g37450	-2.04322	6.35e-29	2.15e-24	yes	down	39.5333	10.1833	38.09	43.95	36.56	8.94	9.2	12.41		_
LOC_Os07g39270	-1.75123	1.12e-28	3.78e-24	yes	down	51.3267	16.2867	55.07	52.82	46.09	15.3	16.69	16.87		RecName: Full=Heterodimeric geranylgeranyl pyrophosphate synthase large subunit 1, chloroplastic; Short=GGPP synthase 1; Short=GGPS1; AltName: Full=(2E,6E)-farnesy
LOC_Os05g20570	-3.14831	1.12e-28	3.79e-24	yes	down	23.7633	2.86667	22.42	21.55	27.32	3.05	1.68	3.87		_
LOC_Os03g19610	-2.1021	1.39e-28	4.69e-24	yes	down	30.7233	7.61333	26.97	30.68	34.52	8.18	6.14	8.52		RecName: Full=Probable pectinesterase 67; Short=PE 67; AltName: Full=Pectin methylesterase 67; Short=AtPME67; Flags: Precursor
LOC_Os03g04000	-1.63123	1.81e-28	6.11e-24	yes	down	32.9233	11.3233	34.57	32.45	31.75	10.8	12.11	11.06		RecName: Full=4-coumarate--CoA ligase-like 4
LOC_Os07g40220	-2.12594	2.06e-28	6.98e-24	yes	down	141.297	34.64	110.14	150.1	163.65	28.98	38.6	36.34		_
LOC_Os02g02450	-2.73665	2.26e-28	7.66e-24	yes	down	164.933	25.9567	163.05	132	199.75	31.65	17.04	29.18		RecName: Full=Probable metal-nicotianamine transporter YSL7; AltName: Full=Protein YELLOW STRIPE LIKE 7; Short=OsYSL7
LOC_Os12g06800	-1.49963	2.5e-28	8.45e-24	yes	down	70.6667	26.6067	67.59	75.73	68.68	27.77	27.7	24.35		RecName: Full=Protein FAM135A
LOC_Os11g01490	-1.89758	2.75e-28	9.29e-24	yes	down	19.21	5.65667	20.84	19.84	16.95	6.01	5.22	5.74		RecName: Full=Nucleosome assembly protein 1;1; Short=NtNAP1;1; AltName: Full=Nucleosome assembly protein 1-like 1; Short=NtNAP1_L1; Flags: Precursor
LOC_Os01g03310	-8.38938	2.76e-28	9.34e-24	yes	down	26.45	0.09	31.6	24.07	23.68	0.14	0.13	0		RecName: Full=Bowman-Birk type bran trypsin inhibitor; AltName: Full=OSE727A; AltName: Full=Protein RBBI3-3; AltName: Full=RBTI; Flags: Precursor
LOC_Os02g39010	-1.75967	3.45e-28	1.17e-23	yes	down	87.7567	32.1033	98.11	84.09	81.07	32.24	36.64	27.43		RecName: Full=Cyclin-dependent kinase G-1; Short=CDKG;1
LOC_Os10g40090	-2.89358	3.46e-28	1.17e-23	yes	down	346.33	49.6933	334.64	341.03	363.32	65.08	28.59	55.41		RecName: Full=Expansin-B9; AltName: Full=Beta-expansin-9; AltName: Full=OsEXPB9; AltName: Full=OsaEXPb1.6; Flags: Precursor
LOC_Os03g56310	-2.10962	3.68e-28	1.24e-23	yes	down	65.2	16.1733	79.31	61.64	54.65	16.42	15.9	16.2		RecName: Full=5'-nucleotidase domain-containing protein 4
LOC_Os09g36520	-2.28229	4.06e-28	1.37e-23	yes	down	48.79	10.72	52.52	43.59	50.26	8.1	10.49	13.57		_
LOC_Os01g15270	-2.41435	4.21e-28	1.42e-23	yes	down	3180.92	637.67	2986.27	2669.77	3886.72	602.03	812.58	498.4		_
LOC_Os09g23350	-2.15946	4.24e-28	1.44e-23	yes	down	67.6067	16.0633	75.26	74.93	52.63	15.08	18.12	14.99		RecName: Full=Alpha,alpha-trehalose-phosphate synthase
LOC_Os02g14840	-3.79657	4.78e-28	1.62e-23	yes	down	30.0867	2.30667	41.13	21.77	27.36	3.45	2.22	1.25		RecName: Full=Potassium channel KAT1
LOC_Os01g67490	-2.3149	5.55e-28	1.88e-23	yes	down	24.5633	5.16	25.33	26.61	21.75	5.19	6.12	4.17		RecName: Full=OTU domain-containing protein At3g57810
LOC_Os01g55520	-2.49407	5.82e-28	1.97e-23	yes	down	12.59	2.39333	10.06	12.66	15.05	2.35	1.97	2.86		RecName: Full=Rop guanine nucleotide exchange factor 9; Short=AtRopGEF9; AltName: Full=Rho of plants guanine nucleotide exchange factor 9
LOC_Os10g32810	-2.52224	6.38e-28	2.16e-23	yes	down	248.893	45.8267	195.36	223.65	327.67	48.21	34.04	55.23		RecName: Full=Beta-amylase 1, chloroplastic; AltName: Full=1,4-alpha-D-glucan maltohydrolase; AltName: Full=Beta-amylase 7; AltName: Full=Thioredoxin-regulated beta
LOC_Os04g03760	-3.75238	7.32e-28	2.47e-23	yes	down	17.0867	1.26667	13.19	12.54	25.53	1.69	1.01	1.1		_
LOC_Os01g59360	-2.47012	7.6e-28	2.57e-23	yes	down	127.527	24.44	117.39	119.73	145.46	27.86	16.24	29.22		RecName: Full=Calcium-dependent protein kinase 34
LOC_Os06g39230	-1.91875	7.63e-28	2.58e-23	yes	down	78.3267	22.0333	68.37	86.11	80.5	19.13	19.93	27.04		RecName: Full=Aldehyde dehydrogenase family 2 member C4; AltName: Full=ALDH1a; AltName: Full=Protein REDUCED EPIDERMAL FLUORESCENCE 1
LOC_Os04g38780	-2.07487	8.97e-28	3.03e-23	yes	down	34.6233	8.86333	32.45	30.66	40.76	7.25	8.93	10.41		RecName: Full=MADS-box transcription factor 57; AltName: Full=OsMADS57
LOC_Os05g16824	-2.75433	1.05e-27	3.57e-23	yes	down	74.53	11.8267	77.44	56.64	89.51	12.96	14.51	8.01		RecName: Full=Probable LRR receptor-like serine/threonine-protein kinase At1g56130; Flags: Precursor
LOC_Os08g02880	-2.71729	1.06e-27	3.58e-23	yes	down	29.9167	4.91	29.17	29.07	31.51	5.48	3.54	5.71		_
LOC_Os05g04550	-1.61291	1.17e-27	3.95e-23	yes	down	58.21	20.1733	61.58	57.31	55.74	21.19	20.56	18.77		RecName: Full=CBL-interacting protein kinase 17; AltName: Full=OsCIPK17
LOC_Os08g16660	-1.68172	1.17e-27	3.96e-23	yes	down	15.98	5.29	14.97	16.1	16.87	5.43	5.32	5.12		RecName: Full=Aspartic proteinase nepenthesin-1; AltName: Full=Nepenthesin-I; Flags: Precursor
LOC_Os04g01980	-2.46409	1.36e-27	4.59e-23	yes	down	20.85	4.03667	20.96	19.06	22.53	4.21	4.7	3.2		RecName: Full=Probable carbohydrate esterase At4g34215
LOC_Os02g01150	-2.28926	1.93e-27	6.52e-23	yes	down	6.57667	1.44	7.3	6.03	6.4	1.38	1.56	1.38		RecName: Full=Glycerate dehydrogenase; Short=GDH; AltName: Full=NADH-dependent hydroxypyruvate reductase; Short=HPR
LOC_Os09g37100	-1.83435	1.93e-27	6.54e-23	yes	down	18.7767	5.53	18.69	19.41	18.23	6.48	5.28	4.83		RecName: Full=Phospholipase D beta 1; Short=AtPLDbeta1; Short=PLD beta 1; Short=PLDbeta
LOC_Os05g33580	-3.39991	2e-27	6.77e-23	yes	down	67.1367	6.78	43.4	57.68	100.33	7.32	4.72	8.3		_
LOC_Os09g22000	-3.52283	2.19e-27	7.4e-23	yes	down	159.17	14.9067	193.39	203.57	80.55	12.03	13.17	19.52		_
LOC_Os01g06340	-2.95822	2.32e-27	7.83e-23	yes	down	18.18	2.51	20.59	15.92	18.03	2.01	2.45	3.07		_
LOC_Os03g09170	-2.85983	2.48e-27	8.38e-23	yes	down	37.4333	5.49667	35.82	42.07	34.41	4.01	8.03	4.45		RecName: Full=Ethylene-responsive transcription factor RAP2-13; AltName: Full=Ethylene-responsive transcription factor ERF058; AltName: Full=Protein RELATED TO APE
LOC_Os10g26500	-2.12183	3.46e-27	1.17e-22	yes	down	40.0767	9.82333	44.26	30.99	44.98	9.3	10.02	10.15		RecName: Full=Homeobox-leucine zipper protein HOX23; AltName: Full=HD-ZIP protein HOX23; AltName: Full=Homeodomain transcription factor HOX23; AltName: Full=OsHox2
LOC_Os05g40740	-2.55363	4.9e-27	1.66e-22	yes	down	215.043	38.8167	173.8	202.14	269.19	39.3	27.19	49.96		RecName: Full=L-ascorbate oxidase homolog; Flags: Precursor
LOC_Os01g55370	-2.24603	5.45e-27	1.84e-22	yes	down	28.8167	6.47667	30.21	27.03	29.21	4.92	8.15	6.36		_
LOC_Os05g41220	-2.08091	5.86e-27	1.98e-22	yes	down	103.05	25.79	100.62	103.45	105.08	28.41	29.75	19.21		RecName: Full=SNF1-related protein kinase regulatory subunit beta-1; Short=AKIN subunit beta-1; Short=AKINB1; Short=AKINbeta1
LOC_Os12g39620	-1.97666	6.94e-27	2.35e-22	yes	down	59.3667	15.8567	64.33	54.79	58.98	13.55	19.39	14.63		RecName: Full=Probable disease resistance protein At4g33300
LOC_Os12g05440	-2.71445	8.77e-27	2.97e-22	yes	down	69.3433	11.29	79.53	63.98	64.52	9.26	15.99	8.62		RecName: Full=Cytochrome P450 94C1
LOC_Os06g49470	-2.29193	8.87e-27	3e-22	yes	down	76.1333	16.6267	76.16	66.42	85.82	20.39	12.67	16.82		RecName: Full=Peptidyl-prolyl cis-trans isomerase CYP20-1; Short=PPIase CYP20-1; AltName: Full=Cyclophilin of 20 kDa 1; AltName: Full=Rotamase CYP20-1; AltName: Fu
LOC_Os10g33240	-2.57976	8.93e-27	3.02e-22	yes	down	20.4567	3.62333	17.47	18.43	25.47	3.77	2.51	4.59		_
LOC_Os04g55920	-1.86731	1.18e-26	3.99e-22	yes	down	374.543	109.743	433.97	319.65	370.01	115.61	112.89	100.73		RecName: Full=Protein TIFY 3B; AltName: Full=Jasmonate ZIM domain-containing protein 12
LOC_Os02g27220	-1.59894	1.23e-26	4.16e-22	yes	down	50.0767	17.48	55.15	47.7	47.38	17.13	17.52	17.79		RecName: Full=Probable protein phosphatase 2C 14; Short=OsPP2C14
LOC_Os06g40180	-6.54869	1.23e-26	4.17e-22	yes	down	109.163	1.24333	133.91	78.83	114.75	1.85	1.44	0.44		RecName: Full=Phospholipase D alpha 1; Short=PLD alpha 1; AltName: Full=Choline phosphatase 1; AltName: Full=Phosphatidylcholine-hydrolyzing phospholipase D 1; Fl
LOC_Os06g47110	-2.66774	1.27e-26	4.3e-22	yes	down	46.5233	7.76	39.91	42.91	56.75	8.19	5	10.09		RecName: Full=COBRA-like protein 10; Flags: Precursor
LOC_Os05g38960	-2.81093	1.3e-26	4.4e-22	yes	down	48.4933	7.46333	37.61	40.15	67.72	6.1	7.07	9.22		_
LOC_Os01g39970	-2.71041	1.35e-26	4.58e-22	yes	down	296.69	48.0067	259.04	257.05	373.98	54.09	30.31	59.62		RecName: Full=U-box domain-containing protein 34; AltName: Full=Plant U-box protein 34; Includes: RecName: Full=E3 ubiquitin ligase; Includes: RecName: Full=Serine
LOC_Os08g02120	-1.92239	1.44e-26	4.86e-22	yes	down	237.03	66.6467	255.18	229.14	226.77	75.07	70.91	53.96		RecName: Full=Fructokinase-2; AltName: Full=Fructokinase II; AltName: Full=OsFKII
LOC_Os08g07500	-3.48665	1.5e-26	5.08e-22	yes	down	18.8633	1.78	11.91	17.15	27.53	2.08	1.24	2.02		RecName: Full=Protein MIZU-KUSSEI 1
LOC_Os04g37520	-4.19119	1.68e-26	5.69e-22	yes	down	8.42333	0.496667	7.9	9.98	7.39	0.84	0.46	0.19		_
LOC_Os01g20780	-2.59906	1.97e-26	6.66e-22	yes	down	31.1567	5.49	25.5	28.62	39.35	4.33	5.51	6.63		RecName: Full=Translation initiation factor IF-2
LOC_Os03g55850	-1.89083	1.97e-26	6.66e-22	yes	down	82.3833	23.7767	91.19	77.81	78.15	21.59	21.25	28.49		RecName: Full=Cold-regulated 413 plasma membrane protein 2; Short=AtCOR413-PM2
LOC_Os05g03640	-2.53878	2.03e-26	6.88e-22	yes	down	103.077	18.9733	126.47	93.76	89	18.06	24.28	14.58		RecName: Full=Protein SRG1; Short=AtSRG1; AltName: Full=Protein SENESCENCE-RELATED GENE 1
LOC_Os03g16760	-2.76669	2.17e-26	7.33e-22	yes	down	7.13667	1.12	7.57	7.72	6.12	1.47	0.98	0.91		RecName: Full=Probable protein phosphatase 2C 31; Short=OsPP2C31
LOC_Os04g57540	-1.86475	3.07e-26	1.04e-21	yes	down	56.6867	16.4867	57.31	48.43	64.32	15.39	17.26	16.81		RecName: Full=Probable adenylate kinase 6, chloroplastic; AltName: Full=ATP-AMP transphosphorylase 6; AltName: Full=ATP:AMP phosphotransferase; AltName: Full=Adeny
LOC_Os03g02530	-1.74065	3.49e-26	1.18e-21	yes	down	49.35	15.44	49.38	56.58	42.09	15.28	15.15	15.89		RecName: Full=Inactive rhomboid protein 1; Short=iRhom1; AltName: Full=Rhomboid family member 1
LOC_Os03g06730	-2.47327	3.74e-26	1.27e-21	yes	down	13.0867	2.51	13.1	10.24	15.92	2.11	2.81	2.61		_
LOC_Os05g05210	-1.56175	4.36e-26	1.47e-21	yes	down	38.65	14.0433	39.69	35.57	40.69	12.63	14.94	14.56		RecName: Full=LEC14B protein
LOC_Os04g54850	-2.98364	4.44e-26	1.5e-21	yes	down	7.33	1.00333	6.46	7.54	7.99	1.07	0.59	1.35		RecName: Full=Putative pectinesterase/pectinesterase inhibitor 28; Includes: RecName: Full=Pectinesterase inhibitor 28; AltName: Full=Pectin methylesterase inhibi
LOC_Os04g52380	-2.02398	4.85e-26	1.64e-21	yes	down	77.4733	20.5433	95.05	70.63	66.74	19.39	20.47	21.77		_
LOC_Os11g31400	-2.81952	5.57e-26	1.88e-21	yes	down	449.443	68.1467	334.23	381.19	632.91	79.76	47.84	76.84		_
LOC_Os02g16909	-2.07009	5.59e-26	1.89e-21	yes	down	116.623	28.67	89.04	120.07	140.76	27.63	26.72	31.66		_
LOC_Os08g24946	-1.40131	5.8e-26	1.96e-21	yes	down	48.14	19.3067	51.15	45.83	47.44	19.04	20.16	18.72		_
LOC_Os03g08520	-4.40984	6.42e-26	2.17e-21	yes	down	45.95	2.30667	44.4	51.79	41.66	1.1	4.61	1.21		_
LOC_Os05g21180	-1.9827	7.07e-26	2.39e-21	yes	down	60.3233	15.9933	60.44	49.25	71.28	17.1	17.01	13.87		RecName: Full=Phosphatidylinositol:ceramide inositolphosphotransferase; AltName: Full=Inositol-phosphorylceramide synthase; Short=IPC synthase; AltName: Full=Protei
LOC_Os03g57450	-1.76594	7.62e-26	2.58e-21	yes	down	26.3767	8.24667	26.7	26.74	25.69	7.77	9.71	7.26		RecName: Full=Calcium-dependent protein kinase 1; Short=AtCDPK 1; Short=CDPK 1; AltName: Full=Calcium-dependent protein kinase isoform AK1
LOC_Os09g27650	-1.92171	8.25e-26	2.79e-21	yes	down	103.55	28.0633	101.74	81.75	127.16	26.79	30.74	26.66		RecName: Full=Protein SHOOT GRAVITROPISM 5; AltName: Full=Indeterminate(ID)-domain protein 15; Short=AtIDD15
LOC_Os01g56030	-3.73154	8.51e-26	2.88e-21	yes	down	10.7567	0.93	10.44	8.99	12.84	1.33	0.9	0.56		_
LOC_Os01g64730	-1.51164	9.05e-26	3.06e-21	yes	down	42.3133	15.36	40.19	44.12	42.63	13.72	16.93	15.43		RecName: Full=G-box-binding factor 4; AltName: Full=bZIP transcription factor 40; Short=AtbZIP40
LOC_Os08g23130	-2.84946	1.09e-25	3.69e-21	yes	down	5.59333	0.823333	4.44	5.4	6.94	0.73	0.68	1.06		RecName: Full=Oligopeptide transporter 1; Short=AtOPT1
LOC_Os04g57350	-2.29217	1.18e-25	4e-21	yes	down	119.067	21.3933	104.51	109.92	142.77	22.64	12.57	28.97		RecName: Full=EH domain-containing protein 1; AltName: Full=PAST homolog 1; Short=mPAST1
LOC_Os03g22200	-2.2729	1.23e-25	4.15e-21	yes	down	24.9567	5.39	22.79	28.27	23.81	4.24	5.71	6.22		RecName: Full=Bidirectional sugar transporter SWEET16; Short=OsSWEET16
LOC_Os11g05070	-1.69486	1.34e-25	4.52e-21	yes	down	24.35	8.62667	22.6	27.62	22.83	8.95	8.6	8.33		RecName: Full=Cation/calcium exchanger 5; AltName: Full=Protein CATION EXCHANGER 11
LOC_Os02g55380	-2.67436	1.44e-25	4.87e-21	yes	down	81.7067	13.8667	87.34	64.81	92.97	10.23	12.12	19.25		RecName: Full=Ethylene-responsive transcription factor ERF003
LOC_Os02g10630	-2.73035	1.47e-25	4.96e-21	yes	down	2.92	0.466667	2.79	3.13	2.84	0.59	0.42	0.39		RecName: Full=C2 and GRAM domain-containing protein At1g03370
LOC_Os04g41250	-2.74534	1.55e-25	5.25e-21	yes	down	73.6667	11.67	69.13	68.33	83.54	11.87	6.97	16.17		RecName: Full=U-box domain-containing protein 6; AltName: Full=Plant U-box protein 6
LOC_Os04g02910	-1.70272	1.59e-25	5.39e-21	yes	down	148.87	47.7	138.64	154.67	153.3	37.79	53.26	52.05		_
LOC_Os07g38410	-2.45944	1.75e-25	5.93e-21	yes	down	26.2267	5.11333	18.06	26.14	34.48	4.9	5.08	5.36		RecName: Full=Protein YABBY 7; AltName: Full=OsYABBY7
LOC_Os08g45180	-1.80925	1.79e-25	6.05e-21	yes	down	19.5667	6.22	17.62	18.53	22.55	6.2	6.53	5.93		_
LOC_Os01g11940	-1.41617	2.15e-25	7.26e-21	yes	down	89.04	35.65	89.74	89.61	87.77	32.06	37.5	37.39		RecName: Full=Protein HEADING DATE 3B; AltName: Full=FT-like protein 1; AltName: Full=FT-like protein B
LOC_Os03g06720	-1.65013	2.16e-25	7.3e-21	yes	down	25.4267	8.80333	27.99	24.24	24.05	9.15	9.04	8.22		RecName: Full=Putative ion channel POLLUX-like 2
LOC_Os02g12300	-3.50816	2.34e-25	7.9e-21	yes	down	4.50333	0.416667	3.62	4.3	5.59	0.46	0.37	0.42		RecName: Full=Pectate lyase; Flags: Precursor
LOC_Os08g08120	-2.40832	2.74e-25	9.27e-21	yes	down	29.2267	5.49333	25.21	25.46	37.01	4.21	5.01	7.26		RecName: Full=Chromo domain-containing protein LHP1; AltName: Full=Protein LIKE HETEROCHROMATIN PROTEIN 1; AltName: Full=Protein TERMINAL FLOWER 2
LOC_Os02g45540	-1.43386	2.9e-25	9.81e-21	yes	down	54.4233	21.2467	56.34	53.33	53.6	22	20.05	21.69		RecName: Full=Probable rhamnose biosynthetic enzyme 1
LOC_Os01g60110	-1.86893	2.92e-25	9.86e-21	yes	down	40.8667	11.7733	43.5	40.59	38.51	12.01	13.4	9.91		RecName: Full=Calcium uniporter protein, mitochondrial; AltName: Full=Coiled-coil domain-containing protein 109A
LOC_Os11g42410	-3.21765	3.3e-25	1.12e-20	yes	down	16.01	1.83667	13.52	12.45	22.06	1.74	1.82	1.95		_
LOC_Os08g38280	-2.74003	3.74e-25	1.27e-20	yes	down	25.6433	3.99	20.33	25.91	30.69	4.77	2.49	4.71		_
LOC_Os05g38290	-3.28339	3.98e-25	1.35e-20	yes	down	42.9567	4.68333	33.51	39.82	55.54	4.1	2.67	7.28		RecName: Full=Probable protein phosphatase 2C 49; Short=OsPP2C49
LOC_Os02g53000	-1.52057	4.01e-25	1.36e-20	yes	down	41.8767	15.9867	42.73	42.63	40.27	16.63	16.48	14.85		RecName: Full=LysM domain-containing GPI-anchored protein 1; Flags: Precursor
LOC_Os01g37832	-1.7862	4.38e-25	1.48e-20	yes	down	91.3533	28.89	81.32	103.7	89.04	32.55	28.79	25.33		RecName: Full=PITH domain-containing protein 1
LOC_Os01g21970	-2.43437	4.54e-25	1.54e-20	yes	down	334.35	65.69	296.89	312.28	393.88	74.77	42.57	79.73		RecName: Full=Pto-interacting protein 1; Short=Pti1; AltName: Full=Pto kinase interactor 1
LOC_Os12g43700	-2.20577	4.66e-25	1.58e-20	yes	down	19.46	4.48667	18.09	17.5	22.79	3.91	3.87	5.68		RecName: Full=Pathogenesis-related protein PR-1; Flags: Precursor
LOC_Os05g10310	-4.50772	5.28e-25	1.79e-20	yes	down	9.61333	0.503333	12.51	6.17	10.16	0.74	0.56	0.21		RecName: Full=Acid phosphatase 1; AltName: Full=Apase-1(1); Flags: Precursor
LOC_Os05g38270	-2.51666	5.99e-25	2.02e-20	yes	down	22.1867	4.12667	23.18	24.29	19.09	3.13	3.59	5.66		RecName: Full=Ultraviolet-B receptor UVR8; AltName: Full=Protein UV-B RESISTANCE 8; AltName: Full=RCC1 domain-containing protein UVR8
LOC_Os06g48590	-1.3175	6.31e-25	2.13e-20	yes	down	53.9533	22.9633	50.99	53.87	57	21.53	23.79	23.57		RecName: Full=Mitogen-activated protein kinase 4; Short=MAP kinase 4; AltName: Full=Multiple stress-responsive MAP kinase 3; AltName: Full=OsMAP2; AltName: Full=OsM
LOC_Os03g02514	-1.93319	6.63e-25	2.24e-20	yes	down	125.243	35.0867	147.03	112.11	116.59	29.37	38.7	37.19		_
LOC_Os02g39380	-3.08065	6.96e-25	2.35e-20	yes	down	27.84	3.52333	24.92	21.99	36.61	2.67	3.01	4.89		RecName: Full=Probable calcium-binding protein CML17; AltName: Full=Calmodulin-like protein 17
LOC_Os02g36570	-1.5176	7.17e-25	2.43e-20	yes	down	24.8367	9.22	23.76	26.2	24.55	8.15	9.21	10.3		RecName: Full=Uncharacterized protein sll1770
LOC_Os04g21340	-2.58235	8.89e-25	3e-20	yes	down	103.01	17.35	88.36	95.56	125.11	19.79	10.66	21.6		_
LOC_Os03g10620	-1.64907	9.1e-25	3.08e-20	yes	down	91.5233	32.0233	81.79	96.97	95.81	28.68	37.12	30.27		RecName: Full=Probable strigolactone esterase D14; AltName: Full=Protein DWARF-14; AltName: Full=Protein DWARF-88; AltName: Full=Protein HIGH-TILLERING DWARF 2
LOC_Os01g73770	-5.6539	1.02e-24	3.46e-20	yes	down	12.5367	0.266667	8.63	10.89	18.09	0.2	0.54	0.06		RecName: Full=Dehydration-responsive element-binding protein 1F; Short=Protein DREB1F; AltName: Full=Protein C-repeat-binding factor 2; Short=rCBF2
LOC_Os03g17690	-1.27256	1.29e-24	4.37e-20	yes	down	996.923	441.01	1019.91	955.79	1015.07	446.61	410.27	466.15		RecName: Full=L-ascorbate peroxidase 1, cytosolic; Short=APXa; AltName: Full=OsAPx01
LOC_Os05g29930	-3.22677	1.33e-24	4.51e-20	yes	down	77.3	8.91333	69.27	76.05	86.58	13.09	4.52	9.13		_
LOC_Os03g57660	-2.32441	1.34e-24	4.55e-20	yes	down	10.16	2.16333	8.75	11.54	10.19	2.14	2.64	1.71		RecName: Full=Probable glutamate carboxypeptidase 2; AltName: Full=Probable glutamate carboxypeptidase II
LOC_Os01g53330	-2.42534	1.35e-24	4.57e-20	yes	down	6.67667	1.31667	6.51	6.7	6.82	1.2	1.54	1.21		RecName: Full=Anthocyanidin 5,3-O-glucosyltransferase; AltName: Full=UDP-glucose: anthocyanidin 5,3-O-glucosyltransferase
LOC_Os08g30800	-3.35956	1.51e-24	5.11e-20	yes	down	17.1433	1.82667	16.27	14.81	20.35	2.56	1.29	1.63		RecName: Full=Protein PXR1; AltName: Full=PinX1-related protein 1
LOC_Os07g30210	-3.00998	1.55e-24	5.23e-20	yes	down	18.8767	2.47667	13.18	16.63	26.82	2.91	1.96	2.56		RecName: Full=WAT1-related protein At4g16620
LOC_Os09g33910	-2.6726	1.55e-24	5.25e-20	yes	down	21.32	3.57667	19.23	20.99	23.74	4.29	2.13	4.31		RecName: Full=Calcium-dependent protein kinase 32
LOC_Os11g37900	-1.83766	1.57e-24	5.31e-20	yes	down	28.75	8.58	31.26	25.62	29.37	7.95	7.79	10		RecName: Full=3-ketoacyl-CoA synthase 19; Short=KCS-19; AltName: Full=Very long-chain fatty acid condensing enzyme 19; Short=VLCFA condensing enzyme 19
LOC_Os07g32600	-1.79461	1.6e-24	5.4e-20	yes	down	50.7433	15.5333	44.67	49.96	57.6	13.24	14.49	18.87		RecName: Full=Glucan endo-1,3-beta-glucosidase 1; AltName: Full=(1-)3)-beta-glucan endohydrolase 1; Short=(1-)3)-beta-glucanase 1; AltName: Full=Beta-1,3-endogluca
LOC_Os03g06850	-2.25854	1.64e-24	5.54e-20	yes	down	67.33	15.22	55.9	58.48	87.61	16.53	16.7	12.43		RecName: Full=B3 domain-containing protein Os03g0164300
LOC_Os09g32992	-2.33453	1.69e-24	5.7e-20	yes	down	15.1833	3.14667	17.16	14.3	14.09	3.71	2.91	2.82		_
LOC_Os07g36590	-1.80383	1.74e-24	5.87e-20	yes	down	44.8233	13.7067	52.29	40.61	41.57	12.48	14.83	13.81		RecName: Full=G-type lectin S-receptor-like serine/threonine-protein kinase B120; Flags: Precursor
LOC_Os01g45070	-1.79402	1.84e-24	6.22e-20	yes	down	56.7667	17.6867	62.09	55.25	52.96	17.7	14.8	20.56		RecName: Full=Peptide deformylase 1B, chloroplastic; Short=OsPDF1B; Short=PDF 1B; Flags: Precursor
LOC_Os02g10440	-1.53284	1.95e-24	6.61e-20	yes	down	57.85	21.14	49.09	56.74	67.72	21.68	20.46	21.28		_
LOC_Os02g49770	-1.70905	1.96e-24	6.62e-20	yes	down	80.9233	26.37	79.29	76.33	87.15	22.08	25.17	31.86		_
LOC_Os11g33270	-1.95514	2.11e-24	7.13e-20	yes	down	82.1367	22.6833	89.74	91.13	65.54	22.93	20.34	24.78		RecName: Full=Probable xyloglucan endotransglucosylase/hydrolase; Flags: Precursor
LOC_Os01g25460	-3.03594	2.21e-24	7.47e-20	yes	down	74	9.59333	64.79	69.56	87.65	9.97	5.02	13.79		RecName: Full=Pollen-specific leucine-rich repeat extensin-like protein 1; Short=AtPEX1; Short=Pollen-specific LRR/EXTENSIN1; AltName: Full=Cell wall hydroxyprolin
LOC_Os03g38730	-1.61836	2.65e-24	8.98e-20	yes	down	43.8167	14.94	44.43	44.57	42.45	13.23	17.13	14.46		RecName: Full=PXMP2/4 family protein 3; Flags: Precursor
LOC_Os01g05220	-3.53957	2.9e-24	9.8e-20	yes	down	10.1567	1.12667	9.71	9.07	11.69	1.35	1.05	0.98		_
LOC_Os09g08390	-2.22226	3.41e-24	1.15e-19	yes	down	231.83	52.88	289.13	199.97	206.39	57.76	58.04	42.84		_
LOC_Os12g37690	-1.69683	3.6e-24	1.22e-19	yes	down	74.46	24.6167	79.05	80.43	63.9	25.57	22.73	25.55		RecName: Full=Transcription factor MYB108; AltName: Full=Myb-related protein 108; Short=AtMYB108; AltName: Full=Protein BOTRYTIS-SUSCEPTIBLE 1
LOC_Os04g52670	-2.52583	3.99e-24	1.35e-19	yes	down	29.4967	5.44333	22.58	27.77	38.14	4.79	6.65	4.89		_
LOC_Os07g38440	-2.95413	4.12e-24	1.39e-19	yes	down	17.01	2.35	20.66	13.57	16.8	2.34	3.11	1.6		_
LOC_Os07g41250	-2.47363	4.15e-24	1.4e-19	yes	down	29.9133	5.65	31.68	20.5	37.56	5.8	6.46	4.69		RecName: Full=Protein NRT1/ PTR FAMILY 8.5; Short=AtNPF8.5; AltName: Full=Peptide transporter PTR6
LOC_Os01g06620	-3.7994	4.34e-24	1.47e-19	yes	down	40.5033	3.1	24.85	33.23	63.43	3.62	1.6	4.08		_
LOC_Os03g19580	-1.58499	4.36e-24	1.47e-19	yes	down	40.98	14.49	43.87	38.44	40.63	13.79	13.41	16.27		_
LOC_Os06g33330	-1.76649	4.36e-24	1.47e-19	yes	down	15.18	4.78667	12.9	16.39	16.25	4.48	5.16	4.72		RecName: Full=Protein trichome birefringence-like 24
LOC_Os01g55440	-2.67704	5.31e-24	1.8e-19	yes	down	38.33	6.37	34.87	35.07	45.05	7.15	3.78	8.18		RecName: Full=CBL-interacting protein kinase 30; AltName: Full=OsCIPK30
LOC_Os04g41500	-1.38546	5.41e-24	1.83e-19	yes	down	74.8267	30.36	65.92	76.97	81.59	28.44	32.53	30.11		RecName: Full=Histidine protein methyltransferase 1 homolog; AltName: Full=Arsenic-transactivated protein 2; Short=AsTP2; AltName: Full=Methyltransferase-like prot
LOC_Os04g21710	-2.23623	5.42e-24	1.83e-19	yes	down	97.2633	21.99	86.27	88.76	116.76	22.76	15.67	27.54		_
LOC_Os07g26480	-2.74691	5.96e-24	2.01e-19	yes	down	119.697	18.91	97.52	111.38	150.19	24.67	11.41	20.65		RecName: Full=CRIB domain-containing protein RIC1; AltName: Full=ROP-interactive CRIB motif-containing protein 1; AltName: Full=Target of ROP protein RIC1
LOC_Os02g46610	-2.17411	6.46e-24	2.18e-19	yes	down	51.7267	12.2633	53.17	55.4	46.61	8.55	14.21	14.03		_
LOC_Os01g53980	-2.40683	9.12e-24	3.09e-19	yes	down	48.0667	9.19667	42.9	45.59	55.71	7.95	12.73	6.91		RecName: Full=Protein IQ-DOMAIN 31
LOC_Os01g56010	-3.56947	9.14e-24	3.09e-19	yes	down	5.91667	0.536667	4.14	6.28	7.33	0.6	0.46	0.55		RecName: Full=Serpin-Z1; AltName: Full=OrysaZ1
LOC_Os07g43170	-1.55696	9.38e-24	3.17e-19	yes	down	88.8333	32.1	99.55	81.55	85.4	30.69	32.87	32.74		RecName: Full=UMP-CMP kinase 3; AltName: Full=Deoxycytidylate kinase; Short=CK; Short=dCMP kinase; AltName: Full=Uridine monophosphate/cytidine monophosphate kinase;
LOC_Os03g11550	-1.43356	1.03e-23	3.5e-19	yes	down	133.32	52.5567	126.11	143.08	130.77	46.28	58.55	52.84		RecName: Full=Ninja-family protein Os03g0214200
LOC_Os04g56690	-3.09086	1.26e-23	4.25e-19	yes	down	22.17	2.79333	27.94	16.06	22.51	1.91	2.62	3.85		_
LOC_Os01g52260	-2.67832	1.74e-23	5.89e-19	yes	down	104.447	17.4133	101.76	105.24	106.34	10.68	25.55	16.01		RecName: Full=Probable serine acetyltransferase 1; AltName: Full=OsSERAT1;1
LOC_Os03g63950	-1.82286	2.3e-23	7.76e-19	yes	down	60.1433	18.1833	54.49	69.72	56.22	15.9	16.27	22.38		RecName: Full=Ribosome-binding factor PSRP1, chloroplastic; AltName: Full=30S ribosomal protein 1; AltName: Full=CS-S5; Short=CS5; AltName: Full=Plastid-specific 30S
LOC_Os01g59350	-1.87908	2.33e-23	7.87e-19	yes	down	26.8967	7.06	28.93	25.62	26.14	7.69	7.96	5.53		RecName: Full=Transcription factor HBP-1b(c1)
LOC_Os04g57300	-1.75096	2.37e-23	8.01e-19	yes	down	110.473	34.8133	120.14	113.58	97.7	29.73	33.57	41.14		RecName: Full=Phosphatidylinositol 4-kinase gamma 7; Short=AtPI4Kgamma7; Short=PI-4Kgamma7; Short=PI4K gamma 7; AltName: Full=Ubiquitin-like domain kinase gamma 7;
LOC_Os06g46560	-2.60229	2.41e-23	8.16e-19	yes	down	40.3833	7.09	32.73	37.07	51.35	7.59	4.48	9.2		RecName: Full=Transcription factor GAMYB; AltName: Full=OsGAMyb
LOC_Os03g51010	-2.02616	2.43e-23	8.2e-19	yes	down	46.02	12	40	44.94	53.12	11.66	9.26	15.08		RecName: Full=Monoglyceride lipase; Short=MGL; AltName: Full=HU-K5; AltName: Full=Lysophospholipase homolog; AltName: Full=Lysophospholipase-like; AltName: Full=Mon
LOC_Os01g50370	-3.34497	2.62e-23	8.84e-19	yes	down	65.2167	6.80333	55.09	80.79	59.77	6.72	10.41	3.28		RecName: Full=Mitogen-activated protein kinase kinase kinase YODA; AltName: Full=YODA MAPKK kinase
LOC_Os01g64490	-1.74134	2.83e-23	9.56e-19	yes	down	20.3867	6.50333	21.82	21.45	17.89	7.27	6.16	6.08		RecName: Full=Serine/threonine-protein kinase Nek5; AltName: Full=NimA-related protein kinase 5; AltName: Full=OsNek5
LOC_Os08g08440	-4.1624	3.35e-23	1.13e-18	yes	down	30.0567	1.79333	37.69	31.71	20.77	1.39	0.98	3.01		_
LOC_Os05g38660	-3.13891	3.36e-23	1.14e-18	yes	down	34.6533	4.22333	24.81	34.37	44.78	5.51	4.13	3.03		_
LOC_Os01g68650	-2.44858	3.53e-23	1.19e-18	yes	down	51.2167	9.96	40.93	48.35	64.37	10.9	11.86	7.12		_
LOC_Os03g63240	-3.30375	3.89e-23	1.32e-18	yes	down	18.8233	2.24667	20.23	17.61	18.63	2.13	3.4	1.21		RecName: Full=Putative disease resistance protein RGA3; AltName: Full=Blight resistance protein B149; AltName: Full=RGA1-blb
LOC_Os06g17970	-1.94829	4.99e-23	1.69e-18	yes	down	3.77333	1.03667	3.62	3.95	3.75	0.93	1.02	1.16		_
LOC_Os01g41900	-1.81751	5.04e-23	1.71e-18	yes	down	46.47	13.8167	49.29	39.48	50.64	11.91	16.35	13.19		RecName: Full=Transcription factor MYB1R1; AltName: Full=Myb-related protein R1; Short=StMYB1R-1
LOC_Os04g32010	-3.82089	5.26e-23	1.78e-18	yes	down	5.99667	0.453333	8.52	5.04	4.43	0.57	0.52	0.27		RecName: Full=Probable acetolactate synthase 2, chloroplastic; AltName: Full=Acetohydroxy-acid synthase 2; Flags: Precursor
LOC_Os01g62950	-1.85327	6.16e-23	2.08e-18	yes	down	32.43	9.58	29.87	33.71	33.71	9.9	7.71	11.13		RecName: Full=Ras-related protein Rab11C
LOC_Os05g38770	-2.63845	6.55e-23	2.21e-18	yes	down	63.27	10.78	54.46	56.2	79.15	11.98	6.49	13.87		RecName: Full=Serine/threonine-protein kinase At3g07070
LOC_Os04g41160	-1.76516	6.96e-23	2.35e-18	yes	down	98.26	30.5033	104.87	91.05	98.86	23.59	34.61	33.31		RecName: Full=Serine/threonine-protein kinase OXI1; AltName: Full=Protein OXIDATIVE SIGNAL-INDUCIBLE 1
LOC_Os11g40550	-3.02339	7.18e-23	2.43e-18	yes	down	14.9167	1.90333	9.47	12.82	22.46	2.06	1.72	1.93		RecName: Full=Probable inactive leucine-rich repeat receptor-like protein kinase At5g20690; Flags: Precursor
LOC_Os05g46460	-1.35764	7.24e-23	2.45e-18	yes	down	68.1267	34.78	69.08	67.27	68.03	37.71	33.78	32.85		_
LOC_Os08g39460	-2.98982	7.44e-23	2.52e-18	yes	down	51.93	6.93333	44.68	43.19	67.92	8.48	3.7	8.62		RecName: Full=Serine/threonine-protein kinase OXI1; AltName: Full=Protein OXIDATIVE SIGNAL-INDUCIBLE 1
LOC_Os02g10530	-3.1737	9.96e-23	3.37e-18	yes	down	66.1733	7.75667	43.95	50.47	104.1	8.82	5.17	9.28		_
LOC_Os09g34140	-2.31301	1.01e-22	3.43e-18	yes	down	46.49	9.67333	42.47	39.17	57.83	9.54	7.46	12.02		_
LOC_Os02g54130	-1.50245	1.09e-22	3.67e-18	yes	down	98.7833	37.1133	105.15	96.57	94.63	32.3	37.91	41.13		RecName: Full=Chaperone protein DnaJ
LOC_Os03g60150	-1.45926	1.14e-22	3.84e-18	yes	down	39.8633	15.26	42.18	39.5	37.91	13.66	15.91	16.21		RecName: Full=Serine/threonine-protein kinase HT1; AltName: Full=High leaf temperature protein 1
LOC_Os03g64260	-5.29011	1.17e-22	3.97e-18	yes	down	8.42	0.23	8.71	7.38	9.17	0.2	0.43	0.06		RecName: Full=Ethylene-responsive transcription factor 15; Short=AtERF15; AltName: Full=Ethylene-responsive element-binding factor 15; Short=EREBP-15
LOC_Os01g62810	-2.2968	1.19e-22	4.02e-18	yes	down	21.3133	4.82333	24.28	22.06	17.6	4.64	3.77	6.06		RecName: Full=Ultraviolet-B receptor UVR8; AltName: Full=Protein UV-B RESISTANCE 8; AltName: Full=RCC1 domain-containing protein UVR8
LOC_Os05g33400	-1.78571	1.27e-22	4.3e-18	yes	down	73.6167	22.73	68.93	74.73	77.19	18.92	28.34	20.93		_
LOC_Os05g10670	-2.33471	1.54e-22	5.19e-18	yes	down	55.6467	12.0233	47.42	64.87	54.65	9.33	9.23	17.51		RecName: Full=Zinc finger CCCH domain-containing protein 35; Short=OsC3H35; AltName: Full=Protein DELAY OF THE ONSET OF SENESCENCE-like
LOC_Os07g37800	-1.66283	1.58e-22	5.34e-18	yes	down	16.9567	5.70333	16.57	15.98	18.32	5.9	6.09	5.12		_
LOC_Os07g23660	-3.07475	1.86e-22	6.29e-18	yes	down	8.43667	1.06333	6.75	9.74	8.82	0.87	1.03	1.29		RecName: Full=Protein TsetseEP; AltName: Full=EP-repeat protein; Flags: Precursor
LOC_Os02g36380	-1.78841	1.91e-22	6.45e-18	yes	down	19.44	5.91333	18.96	22.29	17.07	4.9	6.48	6.36		RecName: Full=Cryptochrome-1; AltName: Full=Blue light photoreceptor; AltName: Full=Protein BLUE LIGHT UNINHIBITED 1; AltName: Full=Protein ELONGATED HYPOCOTYL 4;
LOC_Os05g38040	-2.50458	2.12e-22	7.18e-18	yes	down	191.027	34.18	208.8	176.56	187.72	36.59	44.23	21.72		_
LOC_Os01g66860	-1.98738	2.2e-22	7.44e-18	yes	down	21.06	5.57667	19.2	18.28	25.7	6.14	4.62	5.97		RecName: Full=Probable LRR receptor-like serine/threonine-protein kinase At5g37450; Flags: Precursor
LOC_Os03g21880	-3.30066	2.25e-22	7.61e-18	yes	down	86.4733	9.51667	52.62	86.48	120.32	11.1	5.68	11.77		_
LOC_Os06g44034	-1.9884	2.41e-22	8.14e-18	yes	down	38.5333	10.2667	32.18	33.78	49.64	9.38	11.83	9.59		_
LOC_Os05g51660	-2.1204	2.46e-22	8.32e-18	yes	down	228.853	56.0367	179.46	205.82	301.28	59.91	44.9	63.3		_
LOC_Os07g09190	-3.37641	2.47e-22	8.36e-18	yes	down	5.17667	0.536667	6.12	5.27	4.14	0.74	0.59	0.28		RecName: Full=Probable 1-deoxy-D-xylulose-5-phosphate synthase 2, chloroplastic; Short=1-deoxyxylulose-5-phosphate synthase; Short=DXP synthase; Short=DXPS; Flags:
LOC_Os06g49320	-1.45311	2.49e-22	8.42e-18	yes	down	18.41	7.13	17.35	17.89	19.99	7.62	7.37	6.4		_
LOC_Os01g66330	-1.7613	2.59e-22	8.75e-18	yes	down	33.89	10.8067	38.53	33.49	29.65	11.67	10.78	9.97		RecName: Full=ATP-dependent Clp protease ATP-binding subunit ClpX
LOC_Os02g32740	-3.12138	2.67e-22	9.03e-18	yes	down	34.9767	4.29	32.52	31.45	40.96	4.83	2.01	6.03		RecName: Full=SNAP25 homologous protein SNAP33; Short=AtSNAP33; AltName: Full=Snap25a; AltName: Full=Synaptosomal-associated protein SNAP25-like 1; Short=SNAP-25-l
LOC_Os02g43330	-7.44222	3.63e-22	1.23e-17	yes	down	42.1033	0.256667	25.59	58.63	42.09	0.04	0.23	0.5		RecName: Full=Homeobox-leucine zipper protein HOX24; AltName: Full=HD-ZIP protein HOX24; AltName: Full=Homeodomain transcription factor HOX24; AltName: Full=OsHox2
LOC_Os10g34730	-5.33499	3.7e-22	1.25e-17	yes	down	8.38	0.216667	8.19	9.17	7.78	0.34	0.25	0.06		RecName: Full=Putative GEM-like protein 8
LOC_Os09g35880	-1.81482	4.33e-22	1.46e-17	yes	down	96.2967	29.23	88.56	96.21	104.12	23.41	27	37.28		RecName: Full=Probable salt tolerance-like protein At1g78600
LOC_Os09g29940	-1.80189	4.42e-22	1.5e-17	yes	down	29.1467	8.85667	31.28	26.32	29.84	8.43	10.65	7.49		RecName: Full=Uncharacterized protein At1g04910
LOC_Os01g62260	-1.9669	4.76e-22	1.61e-17	yes	down	117.99	31.63	94.43	107.62	151.92	35.05	30.54	29.3		RecName: Full=Osmotin-like protein; Flags: Precursor
LOC_Os11g09840	-3.64681	5.64e-22	1.91e-17	yes	down	2.53	0.32	2.91	2.16	2.52	0.12	0.52	0.32		_
LOC_Os03g62760	-3.31314	6.05e-22	2.05e-17	yes	down	8.20333	0.873333	6.85	9.1	8.66	1.25	0.42	0.95		_
LOC_Os11g07960	-1.76193	6.09e-22	2.06e-17	yes	down	120.627	37.8933	107.92	116.18	137.78	32.59	33.55	47.54		RecName: Full=Shikimate O-hydroxycinnamoyltransferase; AltName: Full=Hydroxycinnamoyl transferase; AltName: Full=Hydroxycinnamoyl-Coenzyme A shikimate/quinate hydrox
LOC_Os07g17330	-1.74277	9.12e-22	3.09e-17	yes	down	265.323	86.1033	317.43	225.17	253.37	77.76	84.97	95.58		_
LOC_Os05g35110	-1.3169	9.2e-22	3.11e-17	yes	down	68.57	29.29	69.53	72.19	63.99	30.19	29.28	28.4		RecName: Full=F-box protein SKP2A; AltName: Full=FBL5-like protein; Short=AtFBL5; AltName: Full=SKP2-like protein 1; Short=AtSKP2;1
LOC_Os01g61690	-2.24251	9.24e-22	3.12e-17	yes	down	30.21	6.77	27.33	35.31	27.99	8.05	7.58	4.68		RecName: Full=Serine carboxypeptidase-like 27; Flags: Precursor
LOC_Os01g57940	-2.82248	9.53e-22	3.22e-17	yes	down	78.7967	11.8033	64.91	66.51	104.97	14.44	6.64	14.33		RecName: Full=Serine/threonine-protein kinase PBS1; AltName: Full=AvrPphB susceptible protein 1
LOC_Os09g26660	-1.82923	9.72e-22	3.29e-17	yes	down	9.65	2.89	10.45	8.2	10.3	2.77	2.64	3.26		RecName: Full=Respiratory burst oxidase homolog protein F; AltName: Full=Cytochrome b245 beta chain homolog RbohAp108; AltName: Full=NADPH oxidase RBOHF; Short=AtR
LOC_Os01g74450	-2.06543	1.02e-21	3.44e-17	yes	down	9.82333	2.50667	9.57	9.9	10	2.62	2.26	2.64		RecName: Full=Probable aquaporin TIP1-2; AltName: Full=Tonoplast intrinsic protein 1-2; Short=OsTIP1;2
LOC_Os05g33310	-2.37963	1.17e-21	3.95e-17	yes	down	49.9	12.1033	54.4	46.64	48.66	8.32	10.22	17.77		_
LOC_Os02g18880	-1.78364	1.37e-21	4.62e-17	yes	down	74.4933	22.34	67.86	59.04	96.58	20.94	24.5	21.58		RecName: Full=Calcineurin B-like protein 7
LOC_Os02g52490	-2.26597	1.4e-21	4.72e-17	yes	down	19.3433	4.27333	19.67	17.81	20.55	3.61	3.36	5.85		_
LOC_Os07g49100	-2.56487	1.4e-21	4.75e-17	yes	down	119.483	21.3333	98.4	126.9	133.15	21.42	12.67	29.91		RecName: Full=Probable pectinesterase/pectinesterase inhibitor 21; Includes: RecName: Full=Pectinesterase inhibitor 21; AltName: Full=Pectin methylesterase inhibi
LOC_Os01g65370	-2.31472	1.51e-21	5.1e-17	yes	down	90.83	19.55	87.04	84.6	100.85	15.08	27.5	16.07		RecName: Full=Myb-related protein 330
LOC_Os12g38150	-2.79672	1.75e-21	5.93e-17	yes	down	271.433	41.4767	273.1	193.02	348.18	51.91	47.64	24.88		RecName: Full=Osmotin-like protein; Flags: Precursor
LOC_Os03g12730	-1.22209	1.78e-21	6.02e-17	yes	down	23.99	10.9233	23.52	25.01	23.44	10.92	11.19	10.66		RecName: Full=Leucine-rich repeat receptor-like serine/threonine-protein kinase BAM1; AltName: Full=Protein BARELY ANY MERISTEM 1; Flags: Precursor
LOC_Os11g42440	-3.80424	1.91e-21	6.44e-17	yes	down	4.7	0.356667	3.17	4.15	6.78	0.33	0.26	0.48		RecName: Full=Receptor-like cytosolic serine/threonine-protein kinase RBK2; AltName: Full=Protein ROP BINDING PROTEIN KINASES 2
LOC_Os01g51060	-2.64592	2.03e-21	6.86e-17	yes	down	4.42333	0.746667	3.34	4.22	5.71	0.8	0.72	0.72		RecName: Full=IAA-amino acid hydrolase ILR1-like 2; Flags: Precursor
LOC_Os07g13580	-3.14181	2.04e-21	6.91e-17	yes	down	19.9467	2.39333	14.54	20.51	24.79	2.78	1.17	3.23		RecName: Full=Glucan endo-1,3-beta-glucosidase; AltName: Full=(1-)3)-beta-glucan endohydrolase; Short=(1-)3)-beta-glucanase; AltName: Full=Beta-1,3-endoglucanase; Fl
LOC_Os05g06710	-1.97884	2.06e-21	6.98e-17	yes	down	70.29	19.0967	88.73	62.97	59.17	18.48	20.61	18.2		RecName: Full=GDSL esterase/lipase At1g09390; AltName: Full=Extracellular lipase At1g09390; Flags: Precursor
LOC_Os06g48210	-2.77802	2.58e-21	8.74e-17	yes	down	6.03	0.94	7.66	5.17	5.26	1.09	0.81	0.92		RecName: Full=DEAD-box ATP-dependent RNA helicase 35B
LOC_Os02g45870	-2.55549	2.69e-21	9.09e-17	yes	down	50.7533	9.27333	71.77	36.37	44.12	10.09	8.86	8.87		RecName: Full=Tobamovirus multiplication protein 3; Short=NtTOM3
LOC_Os02g49340	-2.74279	2.81e-21	9.49e-17	yes	down	88.67	14.27	67.85	75.6	122.56	14.93	9.4	18.48		RecName: Full=RPM1-interacting protein 4
LOC_Os05g29810	-3.15018	2.85e-21	9.64e-17	yes	down	99.2	11.8233	69.07	115	113.53	13.59	16.1	5.78		RecName: Full=Ethylene-responsive transcription factor RAP2-3; AltName: Full=Cadmium-induced protein AS30; AltName: Full=Ethylene response factor 72; Short=ERF72;
LOC_Os05g43230	-1.71312	3.01e-21	1.02e-16	yes	down	45.3467	14.76	48.53	41.29	46.22	12.22	14.28	17.78		RecName: Full=Cysteine proteinase RD21a; Short=RD21; Flags: Precursor
LOC_Os05g49810	-2.57513	3.28e-21	1.11e-16	yes	down	11.51	2.05667	10.99	11.93	11.61	2.48	1.37	2.32		_
LOC_Os11g47820	-1.72258	3.44e-21	1.16e-16	yes	down	121.437	39.2367	137.8	108.53	117.98	38.29	45.46	33.96		RecName: Full=Glucan endo-1,3-beta-glucosidase; AltName: Full=(1-)3)-beta-glucan endohydrolase; Short=(1-)3)-beta-glucanase; AltName: Full=Beta-1,3-endoglucanase; Fl
LOC_Os12g44360	-1.33536	3.69e-21	1.25e-16	yes	down	52.4533	22.25	52.92	57.02	47.42	21.78	23.16	21.81		RecName: Full=Sodium/hydrogen exchanger 7; AltName: Full=Na(+)/H(+) exchanger 7; Short=NHE-7; AltName: Full=Protein SALT OVERLY SENSITIVE 1
LOC_Os06g11720	-5.16607	3.79e-21	1.28e-16	yes	down	3.66	0.11	2.56	5.07	3.35	0.16	0.15	0.02		RecName: Full=Cyanohydrin beta-glucosyltransferase; AltName: Full=UDP-glucose-p-hydroxymandelonitrile glucosyltransferase
LOC_Os03g17700	-2.49262	3.86e-21	1.31e-16	yes	down	35.8433	6.40667	24.59	38.87	44.07	5.22	8.65	5.35		RecName: Full=Mitogen-activated protein kinase 5; Short=MAP kinase 5; AltName: Full=Benzothiadiazole-induced MAP kinase 1; AltName: Full=MAP kinase 2; AltName: Ful
LOC_Os08g34910	-2.42166	3.9e-21	1.32e-16	yes	down	102.183	20.08	87.93	90.93	127.69	22.55	12.19	25.5		RecName: Full=Probable pectinesterase/pectinesterase inhibitor 13; Includes: RecName: Full=Pectinesterase inhibitor 13; AltName: Full=Pectin methylesterase inhibi
LOC_Os02g05630	-1.34292	3.96e-21	1.34e-16	yes	down	96.71	40.79	95.95	97.36	96.82	41.04	44.91	36.42		RecName: Full=Probable protein phosphatase 2C 10; Short=OsPP2C10
LOC_Os09g12630	-3.05529	4.32e-21	1.46e-16	yes	down	93.3067	11.9467	63.46	74.97	141.49	15.83	7.9	12.11		_
LOC_Os12g03810	-1.24691	4.38e-21	1.48e-16	yes	down	49.12	22.0367	50.02	48.22	49.12	21.51	22.98	21.62		RecName: Full=CBL-interacting protein kinase 32; AltName: Full=OsCIPK32
LOC_Os06g05209	-2.43733	4.42e-21	1.5e-16	yes	down	160.407	31.5333	146.57	149.66	184.99	32.77	19.01	42.82		RecName: Full=Pectate lyase; Flags: Precursor
LOC_Os02g43700	-2.15023	4.49e-21	1.52e-16	yes	down	236.093	56.6933	261.46	229.55	217.27	49.6	76.94	43.54		RecName: Full=Phospholipase A1-Ibeta2, chloroplastic; Flags: Precursor
LOC_Os03g57080	-2.89978	4.8e-21	1.62e-16	yes	down	35.2967	5.03333	29.21	31.76	44.92	3.31	3.82	7.97		RecName: Full=Patatin-like protein 3; Short=OsPLP3
LOC_Os06g21410	-2.7055	5.65e-21	1.91e-16	yes	down	580.98	97.4167	475.1	518.01	749.83	125.43	44.38	122.44		RecName: Full=Arabinogalactan peptide 23; Short=AG-peptide 23; Flags: Precursor
LOC_Os10g22560	-1.38695	5.79e-21	1.96e-16	yes	down	23.34	9.44667	21.36	22.29	26.37	8.88	10.07	9.39		RecName: Full=Protein NRT1/ PTR FAMILY 8.1; Short=AtNPF8.1; AltName: Full=Peptide transporter PTR1
LOC_Os09g26360	-2.4811	6.3e-21	2.13e-16	yes	down	4.76	0.906667	5.18	4.66	4.44	0.87	0.72	1.13		RecName: Full=Probable pectinesterase/pectinesterase inhibitor 13; Includes: RecName: Full=Pectinesterase inhibitor 13; AltName: Full=Pectin methylesterase inhibi
LOC_Os05g20150	-2.44401	7.38e-21	2.5e-16	yes	down	31.1233	6.07	27.98	30.2	35.19	6.31	3.65	8.25		RecName: Full=Receptor-like protein kinase FERONIA; AltName: Full=Protein SIRENE; Flags: Precursor
LOC_Os06g03390	-2.9875	7.51e-21	2.54e-16	yes	down	299.77	40.7833	239.65	251.11	408.55	40.96	21.74	59.65		_
LOC_Os10g06630	-2.50682	9.43e-21	3.19e-16	yes	down	64.3067	12.1133	59.58	82.93	50.41	8.31	15.9	12.13		RecName: Full=Peptidyl-prolyl cis-trans isomerase; Short=PPIase; AltName: Full=Cyclophilin; AltName: Full=Cyclosporin A-binding protein; AltName: Full=Rotamase
LOC_Os12g37660	-3.30973	9.73e-21	3.29e-16	yes	down	7.69667	0.826667	6.84	8.09	8.16	0.7	0.42	1.36		RecName: Full=Probable pectinesterase 53; Short=PE 53; AltName: Full=Pectin methylesterase 53; Short=AtPME53; Flags: Precursor
LOC_Os09g20650	-1.5418	9.85e-21	3.33e-16	yes	down	66.05	24.16	74.8	62.35	61	22.09	25.69	24.7		_
LOC_Os07g44180	-1.73985	1.06e-20	3.57e-16	yes	down	203.537	65.7667	217.88	223.49	169.24	54.35	65.17	77.78		RecName: Full=Hydrophobic protein LTI6A; AltName: Full=Low temperature-induced protein 6A
LOC_Os04g42210	-2.76861	1.24e-20	4.19e-16	yes	down	66.4433	10.4933	57.98	65.4	75.95	11.74	5.46	14.28		_
LOC_Os02g26320	-4.00483	1.26e-20	4.28e-16	yes	down	11.0733	0.73	9.15	9.52	14.55	0.59	0.27	1.33		RecName: Full=Fasciclin-like arabinogalactan protein 14; Flags: Precursor
LOC_Os06g48720	-2.24964	1.38e-20	4.68e-16	yes	down	160.477	35.96	209.33	140.25	131.85	38.49	41.46	27.93		RecName: Full=Putative inactive cadmium/zinc-transporting ATPase HMA3; AltName: Full=Putative inactive cadmium/zinc-transporting ATPase 4; AltName: Full=Putative
LOC_Os05g10800	-3.05979	1.41e-20	4.76e-16	yes	down	29.91	3.52333	20.04	23.64	46.05	3.4	2.8	4.37		_
LOC_Os11g43630	-2.3482	1.42e-20	4.81e-16	yes	down	25.46	5.24	22.75	25.28	28.35	5.77	3.27	6.68		_
LOC_Os06g40210	-2.2294	1.45e-20	4.9e-16	yes	down	124.327	28.23	107.05	103.36	162.57	21.69	26.42	36.58		_
LOC_Os07g48090	-2.0367	1.47e-20	4.96e-16	yes	down	162.71	42.3133	174.85	125.76	187.52	31.55	45.13	50.26		RecName: Full=CBL-interacting protein kinase 29; AltName: Full=OsCIPK29
LOC_Os06g12150	-2.18552	1.59e-20	5.36e-16	yes	down	21.4867	4.79	18.81	18.41	27.24	5.82	4.3	4.25		RecName: Full=Shikimate kinase 2, chloroplastic; Short=OsSK2; Flags: Precursor
LOC_Os03g24510	-3.06355	1.6e-20	5.41e-16	yes	down	8.73667	1.10333	5.86	8.67	11.68	1.01	0.77	1.53		RecName: Full=Probable galacturonosyltransferase-like 4; AltName: Full=Galactinol synthase 9; Short=AtGolS9; Short=GolS-9
LOC_Os08g35600	-3.74385	1.71e-20	5.77e-16	yes	down	2.96667	0.233333	2.67	2.6	3.63	0.26	0.19	0.25		RecName: Full=Serine/threonine-protein kinase At5g01020
LOC_Os04g49570	-2.05859	1.76e-20	5.95e-16	yes	down	8.94333	2.36333	10.41	8.36	8.06	2.51	2.58	2		RecName: Full=Glutamate receptor 3.1; AltName: Full=Ligand-gated ion channel 3.1; Flags: Precursor
LOC_Os01g13370	-1.54695	1.88e-20	6.37e-16	yes	down	63.8133	22.9867	54.29	58.65	78.5	22.16	23.06	23.74		RecName: Full=E3 ubiquitin-protein ligase SINAT3; AltName: Full=Seven in absentia homolog 3
LOC_Os08g32520	-1.95748	1.92e-20	6.48e-16	yes	down	51.02	14.0267	43.97	47.07	62.02	11.69	12.78	17.61		_
LOC_Os02g32250	-1.58751	2.02e-20	6.82e-16	yes	down	18.5433	6.6	18.84	17.76	19.03	5.78	6.14	7.88		_
LOC_Os02g07930	-2.02302	2.03e-20	6.85e-16	yes	down	21.3067	5.44333	20.7	20.17	23.05	4.04	5.36	6.93		RecName: Full=Zinc finger protein CONSTANS-LIKE 4
LOC_Os01g53090	-3.89387	2.31e-20	7.8e-16	yes	down	6.43333	0.483333	8.01	4.63	6.66	0.28	0.67	0.5		RecName: Full=Pathogen-related protein
LOC_Os05g51090	-2.64307	2.36e-20	7.98e-16	yes	down	221.877	37.7467	175.47	197.22	292.94	39.89	22.14	51.21		RecName: Full=Bidirectional sugar transporter SWEET5; Short=OsSWEET5
LOC_Os01g43844	-1.98478	2.38e-20	8.04e-16	yes	down	105.753	28.3167	120.39	98.85	98.02	30.28	33.85	20.82		RecName: Full=Cytochrome P450 72A11
LOC_Os04g47220	-2.69762	2.54e-20	8.57e-16	yes	down	273.493	45.4067	320.7	293.91	205.87	30.89	36.13	69.2		RecName: Full=Probable aquaporin PIP1-2; AltName: Full=OsPIP1;2; AltName: Full=Plasma membrane intrinsic protein 1-2
LOC_Os03g57780	-1.84972	2.99e-20	1.01e-15	yes	down	25.1867	7.45667	28.52	24.66	22.38	8.35	8.05	5.97		RecName: Full=Probable inactive leucine-rich repeat receptor-like protein kinase At3g03770; Flags: Precursor
LOC_Os03g25150	-1.86503	3.09e-20	1.05e-15	yes	down	34.2567	10.0933	35.52	32.57	34.68	11.35	11.4	7.53		RecName: Full=Flavonoid 3',5'-hydroxylase 1; Short=F3'5'H; AltName: Full=CYPLXXVA1; AltName: Full=Cytochrome P450 75A1
LOC_Os06g20200	-2.00503	3.12e-20	1.05e-15	yes	down	37.8433	10.03	35.66	32.74	45.13	9.59	7.74	12.76		RecName: Full=Probable carboxylesterase 120; AltName: Full=AtCXE20
LOC_Os12g08760	-3.31521	3.36e-20	1.14e-15	yes	down	103.77	11.32	178.86	66.92	65.53	9.89	10.18	13.89		RecName: Full=Carboxyvinyl-carboxyphosphonate phosphorylmutase, chloroplastic; AltName: Full=Carboxyphosphonoenolpyruvate phosphonomutase; Short=CPEP phosphonomuta
LOC_Os03g41480	-2.64416	3.44e-20	1.16e-15	yes	down	28.36	5.32333	21.97	25.05	38.06	4.12	6.74	5.11		_
LOC_Os05g13900	-4.11186	3.72e-20	1.26e-15	yes	down	7.32333	0.456667	7.45	9.9	4.62	0.6	0.16	0.61		RecName: Full=Protein TsetseEP; AltName: Full=EP-repeat protein; Flags: Precursor
LOC_Os10g39660	-2.71067	3.79e-20	1.28e-15	yes	down	38.4367	6.22333	34.07	37.7	43.54	7.31	8.07	3.29		_
LOC_Os03g20550	-1.983	4.01e-20	1.36e-15	yes	down	73.3967	19.6733	83.53	57.84	78.82	18.56	16.8	23.66		RecName: Full=Probable WRKY transcription factor 46; AltName: Full=WRKY DNA-binding protein 46
LOC_Os06g20760	-2.2828	4.22e-20	1.43e-15	yes	down	27.31	5.95333	21.8	24.21	35.92	4.95	6.17	6.74		_
LOC_Os01g14100	-1.43564	4.48e-20	1.52e-15	yes	down	18.01	7.11667	18.32	17.1	18.61	6.58	6.94	7.83		RecName: Full=Probable folate-biopterin transporter 4
LOC_Os01g70120	-2.70923	4.94e-20	1.67e-15	yes	down	27.5	4.45333	20.93	24.34	37.23	5.23	2.71	5.42		_
LOC_Os08g12410	-1.34791	5.09e-20	1.72e-15	yes	down	164.067	68.61	162.81	171.58	157.81	76.83	65.89	63.11		RecName: Full=Probable pectinesterase/pectinesterase inhibitor 13; Includes: RecName: Full=Pectinesterase inhibitor 13; AltName: Full=Pectin methylesterase inhibi
LOC_Os10g37980	-1.27108	5.14e-20	1.74e-15	yes	down	69.6933	30.76	69.73	67.92	71.43	27.59	30.16	34.53		RecName: Full=Arogenate dehydratase 3, chloroplastic; Short=AtADT3; AltName: Full=Prephenate dehydratase 1; Short=AtPDT1; Flags: Precursor
LOC_Os01g03680	-6.21386	5.8e-20	1.96e-15	yes	down	216.147	3.09667	249.5	145.4	253.54	4.41	3.98	0.9		RecName: Full=Bowman-Birk type bran trypsin inhibitor; AltName: Full=OSE727A; AltName: Full=Protein RBBI3-3; AltName: Full=RBTI; Flags: Precursor
LOC_Os01g71040	-2.76707	6.15e-20	2.08e-15	yes	down	13.01	2.03	11.38	12.57	15.08	2.06	1.11	2.92		RecName: Full=Mitotic apparatus protein p62
LOC_Os10g08022	-3.0582	6.72e-20	2.27e-15	yes	down	14.8567	1.9	14.11	15.55	14.91	2.3	0.82	2.58		RecName: Full=Fructose-bisphosphate aldolase cytoplasmic isozyme; AltName: Full=Gravity-specific protein GSC 233
LOC_Os11g26790	-3.65045	7.24e-20	2.45e-15	yes	down	15.0667	1.27	7.08	21.8	16.32	1.08	1.67	1.06		RecName: Full=Water stress-inducible protein Rab21
LOC_Os09g16760	-2.05608	7.61e-20	2.57e-15	yes	down	20.8	5.41333	19.79	15.47	27.14	4.54	6.35	5.35		RecName: Full=Ankyrin repeat domain-containing protein 27; AltName: Full=VPS9 domain-containing protein
LOC_Os09g26800	-1.63655	7.84e-20	2.65e-15	yes	down	51.8133	17.66	59.27	42.36	53.81	16.48	18.51	17.99		RecName: Full=Probable polygalacturonase; Short=PG; AltName: Full=Pectinase
LOC_Os07g48640	-1.5525	8.13e-20	2.75e-15	yes	down	48.6367	20.37	49.6	46.44	49.87	21.12	20.37	19.62		RecName: Full=(+)-neomenthol dehydrogenase; AltName: Full=Menthone:neomenthol reductase; AltName: Full=Short-chain dehydrogenase/reductase 1; Short=AtSDR1
LOC_Os12g42650	-3.07383	8.21e-20	2.78e-15	yes	down	291.553	36.9467	186.06	237.14	451.46	38.66	21.64	50.54		_
LOC_Os06g51390	-1.31551	8.31e-20	2.81e-15	yes	down	52.74	22.2933	55.7	47.25	55.27	21.63	22.17	23.08		RecName: Full=Transmembrane protein 53
LOC_Os07g39310	-1.65646	8.41e-20	2.85e-15	yes	down	38.25	12.91	39.51	42.45	32.79	11.19	15.05	12.49		RecName: Full=Zinc finger protein MAGPIE
LOC_Os11g38870	-1.60244	8.63e-20	2.92e-15	yes	down	29.2667	9.63667	25.03	29.44	33.33	8.4	9.02	11.49		RecName: Full=Transcription factor bHLH11; AltName: Full=Basic helix-loop-helix protein 11; Short=AtbHLH11; Short=bHLH 11; AltName: Full=Transcription factor EN 13
LOC_Os01g02930	-2.38711	9.21e-20	3.12e-15	yes	down	6.46333	1.31667	6.14	6.43	6.82	1.75	1.12	1.08		_
LOC_Os10g02880	-3.55922	9.35e-20	3.16e-15	yes	down	49.7167	4.54667	81.48	37.35	30.32	4.43	6.46	2.75		RecName: Full=O-methyltransferase ZRP4; Short=OMT
LOC_Os03g07960	-3.20198	1.06e-19	3.57e-15	yes	down	13.77	1.66667	13.62	11.05	16.64	1.15	1.17	2.68		_
LOC_Os10g22980	-1.552	1.2e-19	4.07e-15	yes	down	82.9667	29.9133	87.93	91.07	69.9	28.89	32.61	28.24		RecName: Full=Dynein assembly factor 1, axonemal; AltName: Full=Leucine-rich repeat-containing protein 50
LOC_Os10g20480	-1.08726	1.37e-19	4.65e-15	yes	down	22.7933	10.7367	21.56	21.87	24.95	10.5	10.57	11.14		_
LOC_Os02g16000	-1.21103	1.42e-19	4.79e-15	yes	down	71.15	32.6867	69.89	68.02	75.54	33.67	29.81	34.58		RecName: Full=BTB/POZ domain-containing protein At2g46260
LOC_Os11g36230	-3.08399	1.57e-19	5.32e-15	yes	down	20.26	2.56333	20.43	17.91	22.44	3.81	1.22	2.66		_
LOC_Os05g01256	-2.60647	1.62e-19	5.48e-15	yes	down	8.54667	1.49667	7.17	9.31	9.16	1.56	1.95	0.98		RecName: Full=Transcription factor bHLH137; AltName: Full=Basic helix-loop-helix protein 137; Short=AtbHLH137; Short=bHLH 137; AltName: Full=Transcription factor E
LOC_Os02g51550	-2.28486	1.64e-19	5.54e-15	yes	down	15.5133	3.4	13.06	15.06	18.42	3.22	3.66	3.32		_
LOC_Os08g29600	-2.70997	1.67e-19	5.65e-15	yes	down	33.3433	5.55	31.06	31.41	37.56	4.59	3.93	8.13		_
LOC_Os03g18770	-1.73236	1.69e-19	5.73e-15	yes	down	607.233	196.073	730.51	518.88	572.31	175.09	225.65	187.48		RecName: Full=Wound-induced protein 1
LOC_Os02g15594	-1.37577	1.81e-19	6.13e-15	yes	down	53.39	21.9367	57.77	51.71	50.69	23.05	21.89	20.87		RecName: Full=Probable protein phosphatase 2C 13; Short=OsPP2C13
LOC_Os04g51050	-1.39027	1.86e-19	6.28e-15	yes	down	13.0267	5.15	12.24	14.27	12.57	5.33	4.76	5.36		RecName: Full=Wall-associated receptor kinase-like 1; Flags: Precursor
LOC_Os06g04480	-1.89528	1.88e-19	6.35e-15	yes	down	22.3867	6.45333	24.36	20.88	21.92	5.48	6.4	7.48		_
LOC_Os01g35050	-1.77785	1.88e-19	6.36e-15	yes	down	55.15	16.89	65.23	52.46	47.76	15.28	15.37	20.02		RecName: Full=Calcium permeable stress-gated cation channel 1; Short=AtCSC1
LOC_Os02g24430	-2.70562	1.96e-19	6.63e-15	yes	down	24.99	4.01333	23.41	25.48	26.08	4.97	1.96	5.11		RecName: Full=Phosphatidylinositol/phosphatidylcholine transfer protein SFH12; AltName: Full=Protein SEC FOURTEEN HOMOLOGS 12; Short=AtSFH12
LOC_Os02g49460	-1.5748	2.05e-19	6.93e-15	yes	down	18.52	6.60333	16.68	20.99	17.89	6.23	5.86	7.72		RecName: Full=Uncharacterized protein At1g04910
LOC_Os05g01140	-3.39986	2.05e-19	6.94e-15	yes	down	4.57333	0.463333	5.27	5.4	3.05	0.45	0.34	0.6		RecName: Full=Salicylate carboxymethyltransferase; AltName: Full=S-adenosyl-L-methionine:salicylate acid carboxylmethyltransferase; Short=CbSAMT; AltName: Full=Sali
LOC_Os01g14590	-3.47507	2.08e-19	7.05e-15	yes	down	11.1067	1.08	12.61	14.43	6.28	1.33	1.26	0.65		RecName: Full=Pathogen-related protein
LOC_Os03g16350	-2.29028	2.17e-19	7.32e-15	yes	down	78.7767	17.1833	66.02	91.86	78.45	10.37	19.87	21.31		RecName: Full=Putative DNA-binding protein ESCAROLA
LOC_Os04g33440	-1.46816	2.31e-19	7.82e-15	yes	down	123.003	47.6167	125.81	108.06	135.14	50.73	47.95	44.17		RecName: Full=DNA-binding protein S1FA2
LOC_Os03g04130	-1.70568	2.57e-19	8.69e-15	yes	down	10.88	3.55	11.4	11.2	10.04	3.03	3.62	4		RecName: Full=Probable acyl-activating enzyme 1, peroxisomal; AltName: Full=AMP-binding protein 1; Short=AtAMPBP1
LOC_Os01g48680	-1.24728	2.83e-19	9.57e-15	yes	down	39.11	17.71	39.39	37.09	40.85	18.62	18.61	15.9		RecName: Full=Two pore calcium channel protein 1; AltName: Full=OsTPC1; AltName: Full=Voltage-dependent calcium channel protein TPC1
LOC_Os11g02610	-2.07425	2.93e-19	9.91e-15	yes	down	54.1633	13.6867	66.3	42.77	53.42	11.45	12.36	17.25		RecName: Full=Root phototropism protein 2; AltName: Full=BTB/POZ domain-containing protein RPT2
LOC_Os06g05260	-2.66003	3.14e-19	1.06e-14	yes	down	72.97	12.23	54.71	61.95	102.25	11.86	7.69	17.14		RecName: Full=Pectate lyase; Flags: Precursor
LOC_Os04g45010	-3.19492	3.18e-19	1.08e-14	yes	down	11.2767	1.32667	12.89	8.81	12.13	1.92	0.88	1.18		RecName: Full=Pollen-specific protein SF3
LOC_Os01g10470	-2.76346	3.22e-19	1.09e-14	yes	down	73.9067	11.6433	48.6	70.58	102.54	8.89	8.98	17.06		RecName: Full=Protein RALF-like 19; Flags: Precursor
LOC_Os02g43690	-1.32385	3.23e-19	1.09e-14	yes	down	114.617	49.0533	124.4	106.64	112.81	47.66	52.26	47.24		RecName: Full=GTP-binding protein YPTM2
LOC_Os01g66120	-2.57889	3.39e-19	1.15e-14	yes	down	269.377	46.0633	208.29	261.71	338.13	53.93	57.6	26.66		RecName: Full=NAC domain-containing protein 48; Short=ONAC048
LOC_Os10g27310	-1.19269	3.42e-19	1.16e-14	yes	down	25.4567	11.84	25.06	25.14	26.17	11.84	11.83	11.85		_
LOC_Os04g33710	-2.96016	3.48e-19	1.18e-14	yes	down	500.09	68.9133	341.25	388.76	770.26	77.53	40.04	89.17		_
LOC_Os03g17580	-1.35004	3.56e-19	1.2e-14	yes	down	67.45	29.6233	70.2	60.39	71.76	30.6	28.93	29.34		RecName: Full=50S ribosomal protein L10, chloroplastic; AltName: Full=CL10; Flags: Precursor
LOC_Os08g39860	-1.4198	3.6e-19	1.22e-14	yes	down	29.2833	11.6367	26.88	31.49	29.48	12.77	11.84	10.3		RecName: Full=Beta-glucosidase 27; Short=Os8bglu27; Flags: Precursor
LOC_Os01g56270	-1.74683	3.88e-19	1.31e-14	yes	down	22.7833	6.74333	25.28	22.61	20.46	5.51	7.3	7.42		_
LOC_Os01g64870	-1.31223	4.47e-19	1.51e-14	yes	down	52.34	22.47	57.57	49.96	49.49	21.77	22.5	23.14		_
LOC_Os03g16170	-2.43209	4.58e-19	1.55e-14	yes	down	77.13	15.16	55.43	98.5	77.46	9.61	15.63	20.24		RecName: Full=Probable protein phosphatase 2C 30; Short=OsPP2C30
LOC_Os07g25700	-1.45682	4.98e-19	1.68e-14	yes	down	24.84	9.61333	24.11	23.15	27.26	10.36	9.5	8.98		_
LOC_Os11g30350	-2.7154	4.98e-19	1.68e-14	yes	down	5.03	0.893333	4.36	4.51	6.22	1.02	0.45	1.21		RecName: Full=CBS domain-containing protein CBSCBSPB5 Y5053_ARATH RecName: Full=CBS domain-containing protein CBSCBSPB4
LOC_Os03g57640	-3.1338	5.01e-19	1.69e-14	yes	down	27.8633	3.39667	30.44	16.59	36.56	2.14	2.88	5.17		RecName: Full=Probable carboxylesterase 15; AltName: Full=AtCXE15
LOC_Os01g16310	-2.41237	5.05e-19	1.71e-14	yes	down	5.57	1.11	5.71	5.73	5.27	1	1.55	0.78		RecName: Full=Alpha-glucosidase YihQ
LOC_Os01g18170	-4.0741	5.13e-19	1.74e-14	yes	down	7.09667	0.45	8.46	6.8	6.03	0.42	0.12	0.81		RecName: Full=Germin-like protein 1-1; AltName: Full=Germin-like protein 4; Short=OsGER4; Flags: Precursor
LOC_Os03g28090	-2.75441	5.37e-19	1.82e-14	yes	down	38.8733	6.10333	31.23	37.15	48.24	7.17	3.07	8.07		RecName: Full=Probable pectinesterase/pectinesterase inhibitor 13; Includes: RecName: Full=Pectinesterase inhibitor 13; AltName: Full=Pectin methylesterase inhibi
LOC_Os02g34470	-1.09293	5.7e-19	1.93e-14	yes	down	87.12	45.61	89.97	88.45	82.94	42.38	44.54	49.91		_
LOC_Os01g27190	-2.79839	6.16e-19	2.08e-14	yes	down	486.833	74.3667	344.99	413.3	702.21	79.68	42.18	101.24		_
LOC_Os08g13920	-1.79065	6.29e-19	2.13e-14	yes	down	371.723	114.677	359.74	460.19	295.24	99.6	133.04	111.39		RecName: Full=Xyloglucan endotransglycosylase/hydrolase protein 8; AltName: Full=End-xyloglucan transferase; AltName: Full=OsXRT5; AltName: Full=OsXTH8; Flags: Prec
[truncated: 1,352 more rows]

## Sheet: up
Gene_id	Log2FC(N3/N0)	Pvalue	Padjust	Significant	Regulate	N0	N3	N0_1	N0_2	N0_3	N3_1	N3_2	N3_3	Gene name	Gene description
LOC_Os08g29770	6.35806	2.5e-213	8.46e-209	yes	up	1.61	153.6	1.48	1.48	1.87	138.24	127.02	195.54		RecName: Full=Endoglucanase 20; AltName: Full=Endo-1,4-beta glucanase 20; AltName: Full=OsGLU15; Flags: Precursor
LOC_Os02g02320	5.47908	1.77e-155	6e-151	yes	up	10.4667	499.89	12.39	11.5	7.51	493.69	499.24	506.74		RecName: Full=Serine carboxypeptidase 3; AltName: Full=Serine carboxypeptidase III; Flags: Precursor
LOC_Os02g57250	4.65475	2.41e-126	8.14e-122	yes	up	5.34	142.613	4.23	5.73	6.06	154.14	153.83	119.87		RecName: Full=Auxin-responsive protein IAA10; AltName: Full=Indoleacetic acid-induced protein 10
LOC_Os04g39980	5.0726	1.04e-105	3.52e-101	yes	up	1.59667	57.12	0.99	1.79	2.01	55.49	62.26	53.61		RecName: Full=2-oxoglutarate-dependent dioxygenase DAO; AltName: Full=Protein DIOXYGENASE FOR AUXIN OXIDATION
LOC_Os01g04290	4.72753	5.72e-98	1.93e-93	yes	up	15.9567	454.253	20.28	11.9	15.69	421.94	491.15	449.67		RecName: Full=Putative Pol polyprotein from transposon element Bs1; Short=ORF 1
LOC_Os05g02070	2.33477	7.34e-89	2.48e-84	yes	up	925.527	5012.49	868.29	986.89	921.4	4694.97	4977.29	5365.22		_
LOC_Os10g36500	4.75192	1.09e-88	3.69e-84	yes	up	1.93667	55.2	2.13	1.35	2.33	48.37	57.21	60.02		_
LOC_Os02g42450	5.67833	2e-85	6.76e-81	yes	up	2.62333	140.353	4.13	1.98	1.76	126.41	143.79	150.86		RecName: Full=Putative ripening-related protein 2; Flags: Precursor
LOC_Os04g51520	5.15613	2.45e-85	8.3e-81	yes	up	1.21	45.8667	1.39	0.76	1.48	41.68	53.79	42.13		RecName: Full=Probable xyloglucan endotransglucosylase/hydrolase protein 21; Short=At-XTH21; Short=XTH-21; Flags: Precursor
LOC_Os03g47610	4.30159	1.28e-84	4.32e-80	yes	up	1.12	24.2433	1.28	1.4	0.68	20.89	25.12	26.72		RecName: Full=Phosphomethylpyrimidine synthase, chloroplastic; AltName: Full=Hydroxymethylpyrimidine phosphate synthase; Short=HMP-P synthase; Short=HMP-phosphate s
LOC_Os02g45310	3.78635	1.55e-81	5.26e-77	yes	up	1.71333	25.1667	1.37	2.2	1.57	23.78	25.62	26.1		RecName: Full=Probable methyltransferase PMT15
LOC_Os07g34570	3.56196	1.99e-80	6.72e-76	yes	up	83.77	1055.56	73.84	97.07	80.4	962.86	880.78	1323.05		RecName: Full=Thiamine thiazole synthase 2, chloroplastic; AltName: Full=Thiazole biosynthetic enzyme 2; Flags: Precursor
LOC_Os03g25440	5.64422	1.16e-76	3.93e-72	yes	up	1.41333	75.9867	1.27	2.2	0.77	81.29	85.83	60.84		_
LOC_Os03g58790	2.95587	1.32e-75	4.47e-71	yes	up	30.0433	247.963	28.42	32.27	29.44	200.42	275.31	268.16		RecName: Full=Probable mitochondrial chaperone BCS1-B; AltName: Full=BCS1-like protein 2
LOC_Os06g08080	3.41882	7.56e-75	2.56e-70	yes	up	13.0833	148.977	14.21	14.03	11.01	157.69	163.99	125.25		RecName: Full=Pyrophosphate-energized vacuolar membrane proton pump; AltName: Full=Pyrophosphate-energized inorganic pyrophosphatase; Short=H(+)-PPase
LOC_Os11g04010	4.32327	3.06e-71	1.04e-66	yes	up	1.29667	27.7533	1.69	1.01	1.19	29.96	28.57	24.73		RecName: Full=Metacaspase-9; Short=AtMC9; Contains: RecName: Full=Metacaspase-9 subunit p20; Contains: RecName: Full=Metacaspase-9 subunit p10; AltName: Full=Metaca
LOC_Os05g23350	5.70205	6.34e-69	2.15e-64	yes	up	2.73667	154.087	4.07	2.63	1.51	116.03	140	206.23		_
LOC_Os06g48020	5.54082	9.38e-69	3.17e-64	yes	up	0.4	19.8533	0.42	0.27	0.51	20.53	20.41	18.62		RecName: Full=Peroxidase 45; Short=Atperox P45; AltName: Full=ATP8a; Flags: Precursor
LOC_Os03g03790	5.72373	1.82e-67	6.15e-63	yes	up	1.20667	67.4833	1.32	0.84	1.46	81.57	84.32	36.56		RecName: Full=Butyrate--CoA ligase AAE11, peroxisomal; AltName: Full=Acyl-activating enzyme 11; AltName: Full=Butyryl-CoA synthetase
LOC_Os01g10850	3.28724	1.92e-67	6.48e-63	yes	up	6.88667	71.25	6.35	5.66	8.65	76.94	70.64	66.17		RecName: Full=Peroxidase 52; Short=Atperox P52; AltName: Full=ATP49; Flags: Precursor
LOC_Os09g03190	4.73725	1.94e-67	6.57e-63	yes	up	1.07333	26.7567	1.45	0.8	0.97	31.36	24.75	24.16		_
LOC_Os02g50860	2.60308	7.37e-67	2.49e-62	yes	up	15.49	100.153	14.75	14.36	17.36	106.99	98.03	95.44		RecName: Full=Rac-like GTP-binding protein 3; AltName: Full=OsRac3
LOC_Os06g03800	3.14596	2.4e-66	8.13e-62	yes	up	2.11	20.0867	2.27	2.06	2	21.17	19.68	19.41		RecName: Full=Probable E3 ubiquitin-protein ligase XBOS36; AltName: Full=Ankyrin repeat domain and RING finger-containing protein XBOS36; AltName: Full=XB3 protein
LOC_Os08g38700	2.94585	3.79e-63	1.28e-58	yes	up	3.65	29.99	3.33	3.99	3.63	26.58	30.88	32.51		RecName: Full=BTB/POZ domain-containing protein At1g55760
LOC_Os10g35950	7.54145	7.84e-63	2.65e-58	yes	up	0.163333	33	0.23	0.2	0.06	39.51	39.82	19.67		RecName: Full=Benzyl alcohol O-benzoyltransferase; AltName: Full=Benzoyl coenzyme A:benzyl alcohol benzoyl transferase
LOC_Os09g32988	3.58651	1.52e-61	5.13e-57	yes	up	2.21333	31.0267	1.3	3.25	2.09	33.41	29.04	30.63		_
LOC_Os03g58600	4.27802	6.28e-61	2.13e-56	yes	up	0.586667	11.25	0.51	0.51	0.74	13.49	11.21	9.05		RecName: Full=Protein argonaute MEL1; AltName: Full=Protein MEIOSIS ARRESTED AT LEPTOTENE 1; Short=OsMEL1
LOC_Os05g31140	5.49083	2.22e-60	7.5e-56	yes	up	1.76	86.3533	2.99	1.39	0.9	87	75.72	96.34		RecName: Full=Lichenase-2; AltName: Full=(1-)3,1-)4)-beta-glucanase isoenzyme EII; AltName: Full=Endo-beta-1,3-1,4 glucanase II; AltName: Full=Lichenase II; Flags: Pr
LOC_Os04g38570	2.01659	1.73e-58	5.85e-54	yes	up	19.31	82.6833	17.25	20.2	20.48	77.43	82.02	88.6		RecName: Full=ABC transporter B family member 19; Short=ABC transporter ABCB.19; Short=AtABCB19; AltName: Full=Multidrug resistance protein 11; AltName: Full=P-gly
LOC_Os01g19290	5.56219	5.01e-58	1.69e-53	yes	up	0.243333	12.38	0.25	0.25	0.23	14.03	11.87	11.24		RecName: Full=WAT1-related protein At1g09380
LOC_Os04g24600	3.24323	1.02e-57	3.45e-53	yes	up	1.88	19.0033	1.93	2.07	1.64	19.96	19.95	17.1		RecName: Full=Cysteine proteinase 1; Flags: Precursor
LOC_Os06g02530	3.49096	4.83e-57	1.64e-52	yes	up	22.12	265.55	15.81	28.51	22.04	250.73	229.66	316.26		_
LOC_Os06g51060	5.64667	9.84e-56	3.33e-51	yes	up	1.20667	63.89	1.27	0.37	1.98	61.79	60.39	69.49		RecName: Full=Chitinase 1; AltName: Full=Class I chitinase a; Short=OsChia1a; AltName: Full=Pathogenesis related (PR)-3 chitinase 1; Flags: Precursor
LOC_Os05g42240	4.75687	1.56e-55	5.29e-51	yes	up	0.74	21.3433	0.96	0.61	0.65	22.92	21.21	19.9		_
LOC_Os12g40419	2.97005	3.46e-55	1.17e-50	yes	up	2.21333	18.4733	2.45	2.1	2.09	17.85	20.74	16.83		RecName: Full=Wall-associated receptor kinase-like 21; Flags: Precursor
LOC_Os02g34710	4.49837	4.31e-54	1.46e-49	yes	up	0.75	17.93	0.45	0.98	0.82	20.03	17.48	16.28		_
LOC_Os10g38090	5.26504	1.85e-53	6.26e-49	yes	up	1.63333	67.5567	2.57	1.43	0.9	77.01	78.53	47.13		RecName: Full=Cytochrome P450 704C1; AltName: Full=Cytochrome P450 CYPD
LOC_Os01g63190	5.39732	5.12e-52	1.73e-47	yes	up	0.213333	9.69333	0.27	0.25	0.12	7.75	10.43	10.9		RecName: Full=Laccase-7; AltName: Full=Benzenediol:oxygen oxidoreductase 7; AltName: Full=Diphenol oxidase 7; AltName: Full=Urishiol oxidase 7; Flags: Precursor
LOC_Os04g40510	3.34287	9.11e-52	3.08e-47	yes	up	2.62667	28.05	2.02	2.34	3.52	29.93	30.23	23.99		_
LOC_Os06g03580	3.64937	2.25e-51	7.6e-47	yes	up	2.36667	22.3433	2.37	1.93	2.8	18.99	26.9	21.14		RecName: Full=E3 ubiquitin ligase BIG BROTHER; AltName: Full=Protein ENHANCER OF DA1-1
LOC_Os05g29010	2.13819	1.67e-50	5.65e-46	yes	up	12.2067	55.9267	10.72	13.44	12.46	56.56	52.74	58.48		RecName: Full=DNA primase small subunit; AltName: Full=DNA primase 49 kDa subunit; Short=p49
LOC_Os11g37950	6.93401	2.79e-50	9.43e-46	yes	up	0.253333	33.13	0.57	0.06	0.13	37.04	30.19	32.16		RecName: Full=Wheatwin-2; AltName: Full=Pathogenesis-related protein 4b; Flags: Precursor
LOC_Os10g07290	2.37358	4.52e-50	1.53e-45	yes	up	9.57	52.6767	8	10.22	10.49	48.93	50.26	58.84		RecName: Full=Glucan endo-1,3-beta-glucosidase 10; AltName: Full=(1-)3)-beta-glucan endohydrolase 10; Short=(1-)3)-beta-glucanase 10; AltName: Full=Beta-1,3-endogl
LOC_Os02g38970	2.02471	5.71e-50	1.93e-45	yes	up	18.1633	79.2333	16.85	19.57	18.07	80.05	83.95	73.7		RecName: Full=Ankyrin repeat and death domain-containing protein 1A
LOC_Os03g18190	3.28945	1.92e-49	6.48e-45	yes	up	1.73	17.97	1.31	1.88	2	19.61	20.41	13.89		_
LOC_Os05g34854	5.67985	2.53e-49	8.55e-45	yes	up	0.21	11.37	0.25	0.07	0.31	12.37	11.27	10.47		RecName: Full=Gibberellin 20 oxidase 2; AltName: Full=GA 20-oxidase 2; AltName: Full=Gibberellin C-20 oxidase 2; AltName: Full=Os20ox2; AltName: Full=Protein semi
LOC_Os02g55410	2.40369	5.23e-48	1.77e-43	yes	up	20.9933	117.997	19.58	25.13	18.27	113.35	112.15	128.49		RecName: Full=DNA replication licensing factor MCM5; AltName: Full=Minichromosome maintenance protein 5; Short=OsMCM5
LOC_Os07g26110	4.50969	1.15e-47	3.9e-43	yes	up	0.636667	15.62	0.98	0.45	0.48	15.23	16.09	15.54		RecName: Full=CASP-like protein Os07g0442900
LOC_Os08g01530	6.44726	2.69e-46	9.1e-42	yes	up	0.22	20	0.22	0.09	0.35	16.97	19.24	23.79		_
LOC_Os09g25620	2.72729	1.33e-45	4.5e-41	yes	up	8.46333	59.5633	8.43	7.91	9.05	69.33	62.45	46.91		RecName: Full=S-adenosylmethionine decarboxylase proenzyme; Short=AdoMetDC; Short=SAMDC; Contains: RecName: Full=S-adenosylmethionine decarboxylase alpha chain; Co
LOC_Os01g60770	3.53804	7.87e-45	2.66e-40	yes	up	5.95	74.3067	6.65	6.61	4.59	60.59	61.26	101.07		RecName: Full=Expansin-A2; AltName: Full=Alpha-expansin-2; AltName: Full=OsEXP2; AltName: Full=OsEXPA2; AltName: Full=OsaEXPa1.23; AltName: Full=RiExB; AltName: F
LOC_Os12g37400	2.82527	1.23e-44	4.16e-40	yes	up	10.59	79.97	10.64	13	8.13	78.99	71.6	89.32		RecName: Full=DNA replication licensing factor MCM7; AltName: Full=Minichromosome maintenance protein 7; Short=OsMCM7
LOC_Os08g01400	7.27738	3.14e-44	1.06e-39	yes	up	0.11	18.4033	0.07	0.18	0.08	18.93	17.32	18.96		_
LOC_Os05g06840	2.81621	1.46e-43	4.94e-39	yes	up	2.60333	18.8967	2.16	3.33	2.32	17.05	19.02	20.62		RecName: Full=DNA polymerase epsilon subunit 2; AltName: Full=DNA polymerase II subunit 2; AltName: Full=DNA polymerase epsilon subunit B
LOC_Os01g50622	2.36403	8.64e-42	2.92e-37	yes	up	5.94	33.23	4.62	6.5	6.7	33.5	33.83	32.36		RecName: Full=Bifunctional nuclease 1; Short=OsBBD1
LOC_Os06g51050	3.92504	2.54e-41	8.6e-37	yes	up	2.52333	40.9067	3.21	1.97	2.39	48.89	46.2	27.63		RecName: Full=Chitinase 3; AltName: Full=Basic endochitinase 1; AltName: Full=Class I chitinase c; Short=OsChia1c; AltName: Full=Pathogenesis related (PR)-3 chitina
LOC_Os06g07210	2.85797	2.67e-41	9.04e-37	yes	up	8.69	67.0633	8.29	11.24	6.54	66.83	60.55	73.81		RecName: Full=Ribonucleoside-diphosphate reductase large subunit; AltName: Full=Ribonucleoside-diphosphate reductase R1 subunit; Short=AtRNR1
LOC_Os03g29190	2.17438	2.13e-40	7.2e-36	yes	up	3.47	16.7133	3.54	3.42	3.45	15.56	16.97	17.61		RecName: Full=Probable nucleoredoxin 1-1; Short=OsNrx1-1
LOC_Os01g46570	2.15686	2.73e-40	9.22e-36	yes	up	19.9033	92.7767	16.67	21.04	22	103.7	92.62	82.01		RecName: Full=CTP synthase 2; AltName: Full=CTP synthetase 2; AltName: Full=UTP--ammonia ligase 2
LOC_Os02g49420	3.45688	3.05e-40	1.03e-35	yes	up	20.3567	237.03	11.82	23.39	25.86	221.5	200.48	289.11		RecName: Full=Fasciclin-like arabinogalactan protein 2; Flags: Precursor
LOC_Os01g49320	5.13325	6.75e-40	2.28e-35	yes	up	0.66	25.0667	1.04	0.55	0.39	25.93	33.68	15.59		RecName: Full=Acidic endochitinase; Flags: Precursor
LOC_Os06g16290	1.59991	1.09e-39	3.68e-35	yes	up	82.42	267.83	77.01	82.71	87.54	267.54	262.37	273.58		RecName: Full=H/ACA ribonucleoprotein complex subunit 2-like protein; AltName: Full=Nhp2-like protein
LOC_Os06g04870	2.36095	1.14e-39	3.86e-35	yes	up	10.3233	57.4933	11.93	9.45	9.59	58.86	63.68	49.94		RecName: Full=Homeobox-leucine zipper protein HOX2; AltName: Full=HD-ZIP protein HOX2; AltName: Full=Homeodomain transcription factor HOX2; AltName: Full=OsHox2
LOC_Os02g55260	2.82061	1.73e-39	5.84e-35	yes	up	1.68	12.59	1.26	2.12	1.66	12.82	12.67	12.28		RecName: Full=DEAD-box ATP-dependent RNA helicase 1
LOC_Os12g03822	1.94343	2.08e-39	7.03e-35	yes	up	7.45333	29.0467	7.72	6.88	7.76	28.91	27.18	31.05		RecName: Full=Glutamate-rich WD repeat-containing protein 1
LOC_Os11g37960	4.02913	3.13e-39	1.06e-34	yes	up	25.65	453.13	37.33	26.5	13.12	446.46	493.58	419.35		RecName: Full=Wheatwin-2; AltName: Full=Pathogenesis-related protein 4b; Flags: Precursor
LOC_Os02g02870	2.06431	4.09e-39	1.38e-34	yes	up	167.703	741.373	168.92	176.39	157.8	712.76	666.88	844.48		RecName: Full=Glycine-rich protein 2
LOC_Os11g01200	1.95397	7.98e-39	2.7e-34	yes	up	10.4333	42.3567	9.65	11.62	10.03	45.42	42.76	38.89		RecName: Full=Probable LRR receptor-like serine/threonine-protein kinase At1g67720; Flags: Precursor
LOC_Os09g21430	3.44425	8.13e-39	2.75e-34	yes	up	0.63	7.54667	0.37	0.75	0.77	6.83	7.73	8.08		RecName: Full=Zinc finger BED domain-containing protein DAYSLEEPER; AltName: Full=Transposase-like protein DAYSLEEPER
LOC_Os08g43730	2.75621	1.28e-38	4.33e-34	yes	up	2.47	17.6567	2.09	2.69	2.63	20.53	18.75	13.69		_
LOC_Os08g09350	1.61378	3.78e-38	1.28e-33	yes	up	68.44	222.537	64.52	72.2	68.6	227.04	231.92	208.65		RecName: Full=Nucleolin 1; AltName: Full=Protein NUCLEOLIN LIKE 1
LOC_Os09g31380	2.41084	4.92e-38	1.66e-33	yes	up	3.32333	18.7933	3.33	3.17	3.47	19.63	20.3	16.45		RecName: Full=Lysine-specific demethylase 8; AltName: Full=JmjC domain-containing protein 5; AltName: Full=Jumonji domain-containing protein 5
LOC_Os02g35060	2.0911	5.16e-38	1.75e-33	yes	up	7.33	33.1533	6.24	7.21	8.54	31.61	34.98	32.87		RecName: Full=tRNA (guanine(10)-N2)-methyltransferase homolog; AltName: Full=tRNA guanosine-2'-O-methyltransferase TRM11 homolog
LOC_Os12g17950	6.16039	9.74e-38	3.3e-33	yes	up	0.23	17.97	0.31	0.3	0.08	10.49	16.28	27.14		_
LOC_Os04g41040	2.32442	1.63e-37	5.53e-33	yes	up	11.98	62.42	9.18	14	12.76	58.87	62.5	65.89		RecName: Full=DNA-directed RNA polymerases II and IV subunit 5A; Short=RPB5a; AltName: Full=DNA-directed RNA polymerase II subunit E; AltName: Full=RNA polymerase
LOC_Os04g10650	2.15803	1.98e-37	6.69e-33	yes	up	7.80333	37.03	7.03	8.7	7.68	33.55	34.03	43.51		RecName: Full=CDT1-like protein a, chloroplastic; Short=AtCDT1a; Flags: Precursor
LOC_Os01g09590	3.02664	3.22e-37	1.09e-32	yes	up	4.55667	39.6967	3.54	5.92	4.21	33.09	37.2	48.8		RecName: Full=Transcription factor RAX2; AltName: Full=Myb-related protein 38; Short=AtMYB38; AltName: Full=Protein REGULATOR OF AXILLARY MERISTEMS 2
LOC_Os08g44270	7.40229	5.75e-37	1.94e-32	yes	up	3.58	656.56	6.04	3.42	1.28	635.31	723.22	611.15		RecName: Full=KDEL-tailed cysteine endopeptidase CEP1; AltName: Full=Cysteine proteinase CP56; Short=AtCP56; Flags: Precursor
LOC_Os11g30210	2.84608	5.96e-37	2.02e-32	yes	up	0.436667	3.33333	0.37	0.52	0.42	3.48	3.51	3.01		RecName: Full=Disease resistance protein At4g27190
LOC_Os03g63580	4.89338	1.11e-36	3.75e-32	yes	up	0.696667	22.46	1.3	0.48	0.31	19.41	21.29	26.68		RecName: Full=Non-specific phospholipase C4
LOC_Os05g14940	2.38667	1.33e-36	4.51e-32	yes	up	2.61333	14.46	2.15	3.05	2.64	15.03	15.32	13.03		RecName: Full=Zinc finger BED domain-containing protein RICESLEEPER 1; AltName: Full=Transposase-like protein RICESLEEPER 1
LOC_Os01g24030	4.52544	1.84e-36	6.22e-32	yes	up	0.286667	6.95667	0.16	0.39	0.31	8.37	7.04	5.46		RecName: Full=Probable acyl-activating enzyme 2; AltName: Full=AMP-binding protein 2; Short=AtAMPBP2
LOC_Os02g30850	6.75214	2.44e-36	8.25e-32	yes	up	0.19	22.12	0.09	0.32	0.16	27.87	25.56	12.93		RecName: Full=Glutaredoxin-C3; AltName: Full=Protein ROXY 2
LOC_Os09g29600	2.35887	2.71e-36	9.16e-32	yes	up	6.76667	27.9967	6.41	6.54	7.35	28.95	30.89	24.15		RecName: Full=Wall-associated receptor kinase 3; Flags: Precursor
LOC_Os02g40330	4.58303	4.94e-36	1.67e-31	yes	up	0.34	11.0567	0.52	0.26	0.24	13.9	12.65	6.62		_
LOC_Os05g49840	5.84584	8.23e-36	2.78e-31	yes	up	0.156667	9.69	0.26	0.16	0.05	11.87	11.55	5.65		RecName: Full=Phospholipase A1-II 7
LOC_Os04g38620	2.01369	1.22e-35	4.11e-31	yes	up	24.3367	105.12	20.11	26.51	26.39	112.22	105.37	97.77		RecName: Full=NAP1-related protein 1; AltName: Full=Protein SET homolog 1
LOC_Os08g42630	3.07252	1.44e-35	4.88e-31	yes	up	3.32667	29.91	3.92	2.34	3.72	29.77	32.83	27.13		_
LOC_Os06g05090	1.89215	1.72e-35	5.81e-31	yes	up	20.82	82.18	18.86	22.81	20.79	90.23	79.88	76.43		RecName: Full=Protein arginine N-methyltransferase PRMT10
LOC_Os08g34984	3.34977	2.23e-35	7.54e-31	yes	up	1.36333	14.94	1.48	1.36	1.25	14.77	16.69	13.36		_
LOC_Os10g25450	3.07813	2.33e-35	7.87e-31	yes	up	5.95	53.6367	3.52	8.32	6.01	52.49	51.91	56.51		RecName: Full=Subtilisin-like protease; AltName: Full=Cucumisin-like serine protease; Flags: Precursor
LOC_Os09g39410	1.83281	2.66e-35	8.98e-31	yes	up	8.81	33.34	8.12	9.55	8.76	34.24	34.59	31.19		RecName: Full=Alcohol-forming fatty acyl-CoA reductase
LOC_Os05g51830	1.37468	2.92e-35	9.88e-31	yes	up	141.71	391.55	135.85	145.74	143.54	393.7	387.4	393.55		RecName: Full=Histone deacetylase HDT3; AltName: Full=Histone deacetylase 2c; Short=HD2c; AltName: Full=Zm-HD2c
LOC_Os08g03350	2.35276	3.26e-35	1.1e-30	yes	up	24.1767	129.81	22.66	26.73	23.14	126.18	159.41	103.84		RecName: Full=Lysine histidine transporter 1
LOC_Os05g14590	2.33301	9.59e-35	3.24e-30	yes	up	16.6067	88.99	15.37	20.97	13.48	84.13	85.84	97		RecName: Full=DNA replication licensing factor MCM6; AltName: Full=Minichromosome maintenance protein 6; Short=OsMCM6
LOC_Os01g49310	3.1101	1.26e-34	4.25e-30	yes	up	0.903333	8.10667	0.8	0.86	1.05	8.05	10.14	6.13		_
LOC_Os02g56130	2.30294	1.29e-34	4.37e-30	yes	up	53.9367	283.79	43.59	66.12	52.1	259.43	255.97	335.97		RecName: Full=Proliferating cell nuclear antigen; Short=PCNA; AltName: Full=Cyclin
LOC_Os02g40010	2.08192	1.51e-34	5.09e-30	yes	up	58.0667	263.023	66.58	56.02	51.6	257.27	287.01	244.79		RecName: Full=Adenine phosphoribosyltransferase 2; Short=APRT 2
LOC_Os06g10530	3.24025	1.82e-34	6.14e-30	yes	up	5.02333	50.85	5.13	4.18	5.76	55.26	58.56	38.73		_
LOC_Os07g41180	1.60375	2.23e-34	7.55e-30	yes	up	16.59	53.5633	15.91	15.88	17.98	54.63	50.84	55.22		RecName: Full=Caprin homolog
LOC_Os12g13950	2.47953	5.49e-34	1.86e-29	yes	up	4.54	27.7667	3.55	5.76	4.31	25.39	25.2	32.71		_
LOC_Os07g48330	4.33827	7.26e-34	2.46e-29	yes	up	1.34	30.0567	2.35	1.01	0.66	27.84	30.71	31.62		RecName: Full=Cytochrome P450 714B1; AltName: Full=GA 13-oxidase 1; AltName: Full=Gibberellin 13 oxidase 1
LOC_Os05g11980	2.26417	1.61e-33	5.45e-29	yes	up	3.91	19.96	3.91	4.7	3.12	20.54	18.68	20.66		_
LOC_Os03g02874	5.79242	3.99e-33	1.35e-28	yes	up	0.16	14.1567	0.2	0.23	0.05	8.3	9.17	25		_
LOC_Os10g30280	2.72971	4.21e-33	1.42e-28	yes	up	6.29333	44.29	4.08	7.78	7.02	41.13	42.44	49.3		RecName: Full=F-box protein At4g35930
LOC_Os10g38740	3.08726	5.54e-33	1.87e-28	yes	up	4.38667	39.8233	5.33	3.55	4.28	35.39	52.84	31.24		RecName: Full=Probable glutathione S-transferase GSTU6; AltName: Full=28 kDa cold-induced protein
LOC_Os12g03470	2.81633	7.46e-33	2.52e-28	yes	up	23.4533	176.28	29.96	22.92	17.48	194.87	187.36	146.61		RecName: Full=Alpha-L-arabinofuranosidase 1; Short=AtASD1; AltName: Full=Beta-D-xylosidase; Flags: Precursor
LOC_Os01g21070	3.81956	8.31e-33	2.81e-28	yes	up	0.966667	14.3367	0.4	1.09	1.41	14.5	13.24	15.27		RecName: Full=Endoglucanase 3; AltName: Full=Endo-1,4-beta glucanase 3; AltName: Full=OsGLU8; Flags: Precursor
LOC_Os11g03730	2.75709	1.12e-32	3.78e-28	yes	up	13.2933	98.5067	14.31	13.07	12.5	120.95	108.91	65.66		RecName: Full=Alpha-L-arabinofuranosidase 1; Short=AtASD1; AltName: Full=Beta-D-xylosidase; Flags: Precursor
LOC_Os01g05630	2.28503	2.04e-32	6.89e-28	yes	up	52.1967	273.833	47.13	54.92	54.54	245.85	220.55	355.1		RecName: Full=Histone H2B.4
LOC_Os01g36390	2.56689	3.1e-32	1.05e-27	yes	up	18.6467	117.86	19.59	23.22	13.13	116.75	110.97	125.86		RecName: Full=DNA replication licensing factor MCM4; AltName: Full=Minichromosome maintenance protein 4; Short=OsMCM4
LOC_Os12g06200	1.65549	6.07e-32	2.05e-27	yes	up	12.2867	40.23	10.68	13.5	12.68	39.2	41.31	40.18		RecName: Full=Transcription factor E2FA; AltName: Full=E2F transcription factor-3; Short=AtE2F3
LOC_Os02g01332	1.35236	6.91e-32	2.34e-27	yes	up	136.507	373.157	135.97	138.46	135.09	365.22	378.76	375.49		RecName: Full=60S ribosomal protein L9
LOC_Os04g43910	1.68723	1.09e-31	3.7e-27	yes	up	8.78	30.0933	8.74	8.51	9.09	32.45	28.82	29.01		RecName: Full=Auxin response factor 10 ARFJ_ORYSJ RecName: Full=Auxin response factor 10
LOC_Os02g54520	4.08411	1.56e-31	5.29e-27	yes	up	0.516667	9.34667	0.47	0.49	0.59	6.75	7.63	13.66		RecName: Full=Transcription factor RAX3; AltName: Full=Myb-related protein 84; Short=AtMYB84; AltName: Full=Protein REGULATOR OF AXILLARY MERISTEMS 3
LOC_Os07g12250	1.60677	1.98e-31	6.69e-27	yes	up	115.527	377.603	110.08	108.67	127.83	370.35	346.86	415.6		RecName: Full=60S ribosomal protein L24
LOC_Os04g52960	1.32884	2.06e-31	6.98e-27	yes	up	74.5133	198.873	70.95	78.48	74.11	199.7	194.97	201.95		RecName: Full=Nucleolin 2; AltName: Full=Protein NUCLEOLIN LIKE 2
LOC_Os04g39880	4.7543	6.76e-31	2.28e-26	yes	up	1.64333	28.7167	1.71	1.69	1.53	32.09	35.49	18.57		RecName: Full=Beta-glucosidase 12; Short=Os4bglu12; Flags: Precursor
LOC_Os01g52880	3.36909	8.3e-31	2.81e-26	yes	up	2.22	24.3267	1.22	2.84	2.6	21.24	20.95	30.79		RecName: Full=Probable LRR receptor-like serine/threonine-protein kinase At4g36180; Flags: Precursor
LOC_Os07g43604	4.25782	1.02e-30	3.46e-26	yes	up	0.293333	5.88667	0.25	0.41	0.22	5.62	5.28	6.76		_
LOC_Os01g68790	1.48841	1.67e-30	5.65e-26	yes	up	133.457	399.36	128.91	128.06	143.4	388.02	430.48	379.58		RecName: Full=Glycine-rich RNA-binding protein 3, mitochondrial; Short=AtGR-RBP3; AltName: Full=AtRBG3; AltName: Full=Mitochondrial RNA-binding protein 2a; Short=At
LOC_Os05g45450	3.96919	1.72e-30	5.83e-26	yes	up	1.29667	21.8567	1.89	0.69	1.31	20.26	24.11	21.2		_
LOC_Os02g50330	2.60358	2.92e-30	9.87e-26	yes	up	1.59	10.23	1.18	1.96	1.63	8.3	11.82	10.57		RecName: Full=Probable RNA-dependent RNA polymerase 1; Short=OsRDR1
LOC_Os11g04070	2.06177	3.33e-30	1.13e-25	yes	up	9.26	41.15	8.43	9.91	9.44	45.26	42.02	36.17		RecName: Full=60S acidic ribosomal protein P0
LOC_Os01g38580	5.06077	3.62e-30	1.22e-25	yes	up	0.196667	6.83667	0.1	0.38	0.11	4.76	8.97	6.78		RecName: Full=Carotenoid cleavage dioxygenase 8 homolog A, chloroplastic; Short=OsCCD8a; AltName: Full=Protein D10-like; Flags: Precursor
LOC_Os09g17850	2.54777	3.68e-30	1.25e-25	yes	up	7.24667	45.23	6.89	8	6.85	37.75	36.91	61.03		RecName: Full=Probable histone acetyltransferase type B catalytic subunit; AltName: Full=HAT B
LOC_Os06g11290	3.4417	3.91e-30	1.32e-25	yes	up	1.12667	12.9767	1.09	0.95	1.34	12.39	16.88	9.66		RecName: Full=12-oxophytodienoate reductase 1; AltName: Full=12-oxophytodienoate-10,11-reductase 1; Short=OPDA-reductase 1; Short=OsOPR1
LOC_Os11g03780	2.18933	3.92e-30	1.33e-25	yes	up	19.5533	92.55	18.85	21.03	18.78	106.52	99.6	71.53		RecName: Full=Alpha-L-arabinofuranosidase 1; Short=AtASD1; AltName: Full=Beta-D-xylosidase; Flags: Precursor
LOC_Os05g13300	2.46348	5.02e-30	1.7e-25	yes	up	1.73	10.2233	1.51	2.05	1.63	9.62	8.51	12.54		RecName: Full=ATP-dependent RNA helicase chl1; AltName: Full=Chromosome loss protein 1
LOC_Os09g36080	4.68608	5.85e-30	1.98e-25	yes	up	0.356667	9.85667	0.61	0.14	0.32	10.21	12.19	7.17		RecName: Full=Cytochrome P450 71A1; AltName: Full=ARP-2; AltName: Full=CYPLXXIA1
LOC_Os05g48840	3.59459	1.28e-29	4.32e-25	yes	up	5.54333	72.38	8.79	3.62	4.22	78.16	78.36	60.62		_
LOC_Os10g19919	9.15712	1.46e-29	4.93e-25	yes	up	0.0266667	25.6067	0.02	0.04	0.02	15.79	17.94	43.09		_
LOC_Os03g40070	2.78309	2.11e-29	7.15e-25	yes	up	2.63667	19.5	3.04	3.06	1.81	19.56	18.59	20.35		RecName: Full=Isoaspartyl peptidase/L-asparaginase 1; AltName: Full=L-asparagine amidohydrolase 1; Contains: RecName: Full=Isoaspartyl peptidase/L-asparaginase 1 s
LOC_Os03g25450	1.55669	2.94e-29	9.96e-25	yes	up	25.64	80.0433	22.17	28.61	26.14	81.2	75.95	82.98		RecName: Full=H/ACA ribonucleoprotein complex subunit 4; AltName: Full=CBF5 homolog; AltName: Full=Dyskerin; AltName: Full=Nopp-140-associated protein of 57 kDa hom
LOC_Os09g19560	1.41887	3.23e-29	1.09e-24	yes	up	33.22	94.4633	31.81	35	32.85	97.54	94.34	91.51		RecName: Full=Probable protein arginine N-methyltransferase 1
LOC_Os07g43540	2.23201	3.38e-29	1.14e-24	yes	up	5.82667	29.1667	5.16	5.33	6.99	26.72	27.59	33.19		RecName: Full=Origin recognition complex subunit 6
LOC_Os03g38350	3.62148	3.82e-29	1.29e-24	yes	up	5.71	69.6833	7.57	3.6	5.96	51.35	54.45	103.25		_
LOC_Os09g19710	1.68777	4.01e-29	1.36e-24	yes	up	109.013	374.233	106.21	112.22	108.61	419.35	374.33	329.02		RecName: Full=Hypersensitive-induced response protein 1; Short=AtHIR1
LOC_Os08g42440	1.97528	5.08e-29	1.72e-24	yes	up	6.23333	26.1433	7	5.72	5.98	25.12	28.77	24.54		RecName: Full=Zinc finger protein CONSTANS-LIKE 15
LOC_Os10g40290	6.65657	9.01e-29	3.05e-24	yes	up	0.0566667	6.27667	0.07	0.07	0.03	5.73	6.44	6.66		_
LOC_Os05g08360	1.50507	1.49e-28	5.04e-24	yes	up	75.0633	224.043	69.33	73.44	82.42	208.17	245.71	218.25		RecName: Full=Mediator of RNA polymerase II transcription subunit 36a; AltName: Full=Fibrillarin-like protein 2; AltName: Full=Histone-glutamine methyltransferase;
LOC_Os06g43220	3.53149	3e-28	1.01e-23	yes	up	1.29333	15.7233	0.63	1.63	1.62	18.38	16.94	11.85		RecName: Full=Floral homeotic protein APETALA 2
LOC_Os02g43870	1.91465	3.66e-28	1.24e-23	yes	up	4.38	17.6333	4.66	4.56	3.92	16.83	17.66	18.41		RecName: Full=Putative kinase-like protein TMKL1; Flags: Precursor
LOC_Os02g03030	2.99231	5.16e-28	1.74e-23	yes	up	2.68667	23.6267	1.83	3.39	2.84	21.71	19.04	30.13		RecName: Full=Histone-lysine N-methyltransferase ATXR6; AltName: Full=Protein SET DOMAIN GROUP 34; AltName: Full=Trithorax-related protein 6; Short=TRX-related pro
LOC_Os05g24550	1.59588	5.94e-28	2.01e-23	yes	up	73.78	237.137	80.34	74.74	66.26	226.86	240.41	244.14		RecName: Full=Cathepsin B; AltName: Full=Cathepsin B1; Flags: Precursor
LOC_Os05g39850	2.44442	7.09e-28	2.4e-23	yes	up	18.21	105.627	18.05	23.8	12.78	102.65	101.3	112.93		RecName: Full=DNA replication licensing factor MCM3; AltName: Full=Minichromosome maintenance protein 3; Short=OsMCM3
LOC_Os01g07500	4.40125	7.99e-28	2.7e-23	yes	up	0.35	7.65333	0.44	0.34	0.27	8.37	10.41	4.18		RecName: Full=Tryptophan aminotransferase-related protein 2
LOC_Os09g31031	2.89209	9.11e-28	3.08e-23	yes	up	13.34	108.067	12.59	12.86	14.57	88.32	76.63	159.25		RecName: Full=Polyubiquitin 3; Contains: RecName: Full=Ubiquitin; Flags: Precursor
LOC_Os05g42350	1.32402	9.2e-28	3.11e-23	yes	up	36.15	96.3067	36.47	36.83	35.15	94.89	94.57	99.46		RecName: Full=Sulfite reductase
LOC_Os09g32976	1.35095	9.27e-28	3.13e-23	yes	up	250.697	682.453	249.34	250.84	251.91	721.96	635.95	689.45		RecName: Full=60S ribosomal protein L7a
LOC_Os02g48870	3.0046	9.33e-28	3.16e-23	yes	up	2.56	21.9133	2.92	1.64	3.12	16.4	25.32	24.02		RecName: Full=Protein ASPARTIC PROTEASE IN GUARD CELL 2; Short=AtASPG2; Flags: Precursor
LOC_Os02g57360	3.35778	1.01e-27	3.41e-23	yes	up	0.663333	8.23667	0.57	0.75	0.67	7.79	8.5	8.42		_
LOC_Os01g38229	3.73175	1.07e-27	3.63e-23	yes	up	0.683333	9.7	0.52	1.11	0.42	9.87	11.66	7.57		RecName: Full=70 kDa peptidyl-prolyl isomerase; AltName: Full=Peptidyl-prolyl cis-trans isomerase; Short=PPIase; AltName: Full=Rotamase
LOC_Os11g03590	2.36536	1.17e-27	3.97e-23	yes	up	2.65333	14.52	2.36	2.9	2.7	15.44	12.11	16.01		_
LOC_Os04g57880	5.45749	1.27e-27	4.29e-23	yes	up	0.12	5.68667	0.13	0.13	0.1	5.52	8.7	2.84		_
LOC_Os12g03860	2.53761	1.39e-27	4.7e-23	yes	up	2.82667	17.23	3.39	2.68	2.41	16.19	16.76	18.74		RecName: Full=Protein ZINC INDUCED FACILITATOR-LIKE 1; AltName: Full=Protein ZIF-LIKE 1
LOC_Os01g59730	2.05931	1.45e-27	4.9e-23	yes	up	11.2733	50.3067	11.15	10.19	12.48	52.18	51.69	47.05		RecName: Full=60S ribosomal protein L30
LOC_Os06g33200	3.3612	1.54e-27	5.22e-23	yes	up	2.25667	24.7667	2	1.69	3.08	27.39	20.25	26.66		_
LOC_Os03g53800	1.60412	1.74e-27	5.87e-23	yes	up	44.47	143.547	44.78	46.72	41.91	132.98	161.85	135.81		RecName: Full=Lysosomal beta glucosidase; Flags: Precursor
LOC_Os08g32540	2.02614	2.03e-27	6.86e-23	yes	up	8.27	34.15	7.08	7.29	10.44	33.82	37.36	31.27		RecName: Full=Cyclin-D1-2; AltName: Full=G1/S-specific cyclin-D1-2; Short=CycD1;2
LOC_Os07g12650	1.28962	2.21e-27	7.47e-23	yes	up	244.117	640.273	252.3	242.03	238.02	642.81	615.76	662.25		RecName: Full=40S ribosomal protein S12
LOC_Os01g50970	2.30851	2.56e-27	8.65e-23	yes	up	1.97	10.4033	1.82	2.22	1.87	9.94	9.11	12.16		_
LOC_Os02g44730	3.69307	2.66e-27	9e-23	yes	up	0.383333	3.81667	0.15	0.42	0.58	3.64	4.19	3.62		RecName: Full=Hippocampus abundant transcript-like protein 1
LOC_Os04g15920	3.43028	2.91e-27	9.85e-23	yes	up	2.22667	25.5767	2.67	2.02	1.99	30.78	31.43	14.52		RecName: Full=Probable cinnamyl alcohol dehydrogenase 6; Short=OsCAD6
LOC_Os01g01170	3.27347	3.02e-27	1.02e-22	yes	up	2.82667	29.0333	1.83	4.49	2.16	25.59	26.14	35.37		_
LOC_Os09g28200	2.73076	3.15e-27	1.07e-22	yes	up	1.48	10.4167	1.35	1.2	1.89	10.33	8.92	12		RecName: Full=Heat stress transcription factor B-4c; AltName: Full=Heat stress transcription factor 22; Short=OsHsf-22
LOC_Os06g24490	9.19613	5.49e-27	1.86e-22	yes	up	0.0366667	24.3667	0.11	0	0	23.62	25.59	23.89		_
LOC_Os01g08770	1.58945	6.18e-27	2.09e-22	yes	up	9.00667	28.8267	8.95	9.62	8.45	29.02	29.96	27.5		RecName: Full=Probable U3 small nucleolar RNA-associated protein 7; Short=U3 snoRNA-associated protein 7; AltName: Full=U three protein 7
LOC_Os07g12890	4.3991	6.43e-27	2.17e-22	yes	up	0.5	11.0867	0.47	0.28	0.75	11.98	14.53	6.75		RecName: Full=Zinc transporter 8; AltName: Full=ZRT/IRT-like protein 8; Short=OsZIP8; Flags: Precursor
LOC_Os04g44230	3.91616	9.43e-27	3.19e-22	yes	up	0.33	5.26	0.46	0.22	0.31	4.87	4.91	6		RecName: Full=Cytokinin dehydrogenase 8; AltName: Full=Cytokinin oxidase 8; Short=OsCKX8; Flags: Precursor CKX8_ORYSJ RecName: Full=Cytoki
LOC_Os01g07260	2.22909	9.53e-27	3.22e-22	yes	up	19.8	98.7033	17.09	26.5	15.81	96.58	94.55	104.98		RecName: Full=Mini-chromosome maintenance complex-binding protein; Short=MCM-BP; Short=MCM-binding protein; AltName: Full=Protein E2F TARGET GENE 1
LOC_Os12g21798	1.36477	1.18e-26	3.99e-22	yes	up	86.9033	239.01	91.35	84.67	84.69	240.65	238.84	237.54		RecName: Full=40S ribosomal protein S3a; AltName: Full=CYC07 protein
LOC_Os03g18850	3.0049	1.21e-26	4.09e-22	yes	up	2.32667	20.21	2.76	2.51	1.71	17.53	18.55	24.55		RecName: Full=Pathogenesis-related protein 1; Short=AOPR1
LOC_Os03g57870	1.58304	1.39e-26	4.69e-22	yes	up	10.7933	34.4033	10.05	11.81	10.52	34.21	31.77	37.23		RecName: Full=Replication factor C subunit 5; Short=OsRFC5; AltName: Full=Activator 1 subunit 5
LOC_Os02g53690	2.15155	1.41e-26	4.76e-22	yes	up	17.9033	84.5233	18.88	13.92	20.91	96.16	83.97	73.44		RecName: Full=Growth-regulating factor 1; Short=OsGRF1; AltName: Full=Transcription activator GRF1
LOC_Os09g25100	2.82232	2.01e-26	6.81e-22	yes	up	1.15667	8.78	1.39	1.06	1.02	7.95	8.34	10.05		RecName: Full=Putative CBL-interacting protein kinase 27; AltName: Full=OsCIPK27
LOC_Os01g08320	2.19439	2.1e-26	7.1e-22	yes	up	4.42333	21.3233	4.51	4.31	4.45	23.11	23.3	17.56		RecName: Full=Auxin-responsive protein IAA1; AltName: Full=Indoleacetic acid-induced protein 1
LOC_Os07g29320	1.40836	2.14e-26	7.22e-22	yes	up	22.9167	64.79	21.15	24.67	22.93	64.12	65.94	64.31		RecName: Full=Probable rRNA-processing protein EBP2 homolog
LOC_Os11g07500	1.59821	2.39e-26	8.09e-22	yes	up	8.24	26.49	8.66	8.66	7.4	26.56	27.09	25.82		RecName: Full=Superkiller viralicidic activity 2-like 2; AltName: Full=ATP-dependent RNA helicase SKIV2L2; AltName: Full=TRAMP-like complex helicase
LOC_Os01g65130	3.59054	3.07e-26	1.04e-21	yes	up	0.746667	8.07333	1.08	0.46	0.7	8.26	10.18	5.78		RecName: Full=Protein NRT1/ PTR FAMILY 5.11; Short=AtNPF5.11
LOC_Os02g50340	3.13716	3.34e-26	1.13e-21	yes	up	0.536667	5.06667	0.68	0.44	0.49	4.47	5.7	5.03		RecName: Full=MACPF domain-containing protein At1g14780
LOC_Os02g54110	1.37694	4.2e-26	1.42e-21	yes	up	11.88	32.7533	11.3	12.76	11.58	32.5	31.04	34.72		RecName: Full=RRP12-like protein
LOC_Os01g27730	1.40984	4.78e-26	1.62e-21	yes	up	32.1233	91.2333	34.11	31.95	30.31	91.95	90.17	91.58		RecName: Full=Guanine nucleotide-binding protein-like 3 homolog
LOC_Os03g15810	2.50316	5.56e-26	1.88e-21	yes	up	1.94667	12.39	1.59	2.48	1.77	10.24	10.57	16.36		RecName: Full=Chromosome transmission fidelity protein 18 homolog
LOC_Os01g05064	3.5544	6e-26	2.03e-21	yes	up	3.46333	44.12	4.47	1.97	3.95	34.23	37.34	60.79		_
LOC_Os11g34130	1.92641	7.57e-26	2.56e-21	yes	up	2.99	11.7133	2.31	3.25	3.41	11.88	12.37	10.89		RecName: Full=Uncharacterized protein At3g49140
LOC_Os01g40110	1.5385	1.27e-25	4.3e-21	yes	up	11.5967	35.8933	10.74	11.69	12.36	35.34	34.33	38.01		RecName: Full=UBP1-associated proteins 1C
LOC_Os02g40510	1.54245	1.3e-25	4.39e-21	yes	up	14.4867	45.0433	14.68	14.91	13.87	45.8	48.56	40.77		RecName: Full=Two-component response regulator-like PRR1; AltName: Full=Pseudo-response regulator 1; Short=OsPRR1
LOC_Os01g60810	2.54244	1.41e-25	4.78e-21	yes	up	4.34	27.1333	5.73	4.03	3.26	26.63	30.05	24.72		RecName: Full=Transcription repressor OFP2; AltName: Full=Ovate family protein 2; Short=AtOFP2
LOC_Os04g45890	7.34882	1.45e-25	4.91e-21	yes	up	0.0266667	6.32333	0	0.01	0.07	5.16	3.82	9.99		_
LOC_Os03g10040	3.20174	1.49e-25	5.04e-21	yes	up	2.38333	23.3167	2.13	2.04	2.98	21.76	31.33	16.86		RecName: Full=F-box protein SNE; AltName: Full=Protein SNEEZY; AltName: Full=Sleepy protein 2
LOC_Os04g13160	2.19622	1.52e-25	5.15e-21	yes	up	7.04667	34.2767	5.28	8.89	6.97	30.74	32.02	40.07		RecName: Full=F-box/LRR-repeat protein 13
LOC_Os10g26280	2.37319	1.75e-25	5.91e-21	yes	up	2.87333	15.5033	2.15	3.17	3.3	12.49	14.39	19.63		_
LOC_Os08g42600	2.15695	1.88e-25	6.35e-21	yes	up	11.16	41.5333	7.15	18.9	7.43	41.98	39.19	43.43		RecName: Full=Retinoblastoma-related protein 1; Short=OsRBR1
LOC_Os01g47300	6.30447	1.91e-25	6.47e-21	yes	up	0.0933333	9.92	0.18	0.06	0.04	7.63	7.08	15.05		_
LOC_Os03g09940	3.43511	1.95e-25	6.6e-21	yes	up	0.793333	9.02667	0.35	1.01	1.02	7.74	8.1	11.24		RecName: Full=Sulfate transporter 2.1; AltName: Full=AST68
LOC_Os07g49230	1.75563	1.97e-25	6.67e-21	yes	up	4.21667	15.1867	4.51	4.22	3.92	16.5	15.21	13.85		RecName: Full=Ubiquitin-activating enzyme E1 3
LOC_Os04g52780	3.76585	1.99e-25	6.74e-21	yes	up	0.283333	4.15667	0.42	0.26	0.17	4.11	5.39	2.97		RecName: Full=LRR receptor-like serine/threonine-protein kinase FLS2; AltName: Full=Protein FLAGELLIN-SENSING 2; AltName: Full=Protein FLAGELLIN-SENSITIVE 2; Flags:
LOC_Os07g27390	4.50246	2.24e-25	7.59e-21	yes	up	0.566667	16.88	1.06	0.61	0.03	15.66	15.63	19.35		_
LOC_Os02g56100	2.53363	2.36e-25	7.97e-21	yes	up	3.07667	18.97	2.83	4.06	2.34	16.78	16.51	23.62		RecName: Full=Ribonucleoside-diphosphate reductase large subunit; AltName: Full=Ribonucleoside-diphosphate reductase R1 subunit; Short=AtRNR1
LOC_Os03g10500	2.20821	3.15e-25	1.06e-20	yes	up	21.9533	111.697	28.31	19.64	17.91	111.58	103.48	120.03		RecName: Full=Adenylyl-sulfate kinase 3; AltName: Full=ATP adenosine-5'-phosphosulfate 3'-phosphotransferase 3; AltName: Full=Adenosine-5'-phosphosulfate kinase 3;
LOC_Os09g36900	2.65382	3.3e-25	1.11e-20	yes	up	12.03	81.0267	11.49	14.99	9.61	67.08	63.25	112.75		RecName: Full=WD-40 repeat-containing protein MSI2
LOC_Os03g54890	1.2029	3.49e-25	1.18e-20	yes	up	321.183	789.717	304.62	325.43	333.5	817.43	750.57	801.15		RecName: Full=60S ribosomal protein L13a-4
LOC_Os01g61860	1.50057	3.49e-25	1.18e-20	yes	up	24.4767	73.58	25.08	25.29	23.06	78.19	75.56	66.99		RecName: Full=TBC1 domain family member 8; AltName: Full=BUB2-like protein 1; AltName: Full=Vascular Rab-GAP/TBC-containing protein
LOC_Os10g38940	2.89706	3.99e-25	1.35e-20	yes	up	6.80333	53.2067	3.74	9.23	7.44	55.84	57.77	46.01		RecName: Full=Beta-carotene 3-hydroxylase, chloroplastic; Short=GenCHYB; Flags: Precursor
LOC_Os07g22400	2.36873	4.4e-25	1.49e-20	yes	up	8.08667	45.95	6.99	10.8	6.47	39.93	42.13	55.79		RecName: Full=Probable DNA primase large subunit
LOC_Os01g51620	2.70494	4.69e-25	1.59e-20	yes	up	0.963333	6.39667	0.78	1.04	1.07	7.45	6	5.74		RecName: Full=KRR1 small subunit processome component homolog; AltName: Full=KRR-R motif-containing protein 1; AltName: Full=Ribosomal RNA assembly protein mis3
LOC_Os02g58220	2.68005	4.72e-25	1.6e-20	yes	up	15.24	102.993	11.01	20.73	13.98	86.3	84.62	138.06		RecName: Full=Replication protein A 32 kDa subunit A; Short=OsRPA32A; AltName: Full=OsRPA32-1; AltName: Full=Replication factor A protein 2A; AltName: Full=Replica
LOC_Os03g06980	1.47404	5.05e-25	1.71e-20	yes	up	33.96	98.1967	29.84	34.65	37.39	105.39	94.89	94.31		RecName: Full=Heterogeneous nuclear ribonucleoprotein A3; Short=hnRNP A3
LOC_Os02g10220	1.85303	5.76e-25	1.95e-20	yes	up	24.88	95.8433	20.83	27.86	25.95	83.77	88.1	115.66		RecName: Full=Chaperone protein dnaJ 6; Short=AtDjC6; Short=AtJ6
LOC_Os07g47420	1.57023	8.05e-25	2.72e-20	yes	up	41.51	131.847	42.7	36.57	45.26	138.94	124.16	132.44		RecName: Full=60S ribosome subunit biogenesis protein NIP7 homolog
LOC_Os01g64090	1.30204	1.71e-24	5.77e-20	yes	up	41.92	110.263	42.34	41.12	42.3	112.52	108.2	110.07		RecName: Full=60S ribosomal protein L10a-1
LOC_Os11g08330	1.97289	1.9e-24	6.42e-20	yes	up	7.92667	32.9967	6.44	9.78	7.56	29.52	30.28	39.19		RecName: Full=DNA polymerase delta catalytic subunit
LOC_Os05g47890	1.2103	1.92e-24	6.5e-20	yes	up	118.03	291.157	116.87	121.11	116.11	299.75	281.9	291.82		RecName: Full=Guanine nucleotide-binding protein subunit beta-like protein B; Short=GPB-LR; AltName: Full=Receptor for activated C kinase 1B
LOC_Os03g52880	1.45753	1.95e-24	6.6e-20	yes	up	6.32667	18.45	6.29	6.06	6.63	17.27	18.89	19.19		RecName: Full=Root phototropism protein 3; AltName: Full=BTB/POZ domain-containing protein RPT3; AltName: Full=Non-phototropic hypocotyl protein 3
LOC_Os01g03730	2.49613	2.06e-24	6.97e-20	yes	up	18.6367	113.113	25.81	16.51	13.59	115.41	114.01	109.92		RecName: Full=Endonuclease 4; Short=AtENDO4; AltName: Full=Deoxyribonuclease ENDO4; AltName: Full=Single-stranded-nucleate endonuclease ENDO4; Flags: Precursor
LOC_Os09g06560	2.15196	2.25e-24	7.59e-20	yes	up	4.9	23.3067	4.04	6.34	4.32	21.38	20.67	27.87		RecName: Full=WD repeat and HMG-box DNA-binding protein 1; AltName: Full=Acidic nucleoplasmic DNA-binding protein 1; Short=And-1
LOC_Os04g57730	2.24502	2.39e-24	8.07e-20	yes	up	4.51	22.43	3.16	5.07	5.3	21.13	20.08	26.08		RecName: Full=Uracil-DNA glycosylase; Short=UDG
LOC_Os01g65169	2.91894	2.61e-24	8.82e-20	yes	up	1.47	11.8	1.08	2.17	1.16	11.28	13.81	10.31		RecName: Full=Protein NRT1/ PTR FAMILY 5.10; Short=AtNPF5.10
LOC_Os04g49860	2.25953	2.67e-24	9.05e-20	yes	up	1.92667	9.81	1.49	2.61	1.68	9.16	9.75	10.52		RecName: Full=DNA replication ATP-dependent helicase/nuclease DNA2; AltName: Full=DNA replication ATP-dependent helicase-like homolog; Includes: RecName: Full=DNA
LOC_Os02g51890	1.94981	3.76e-24	1.27e-19	yes	up	4.42	18.1733	5.21	4.08	3.97	15.67	18.54	20.31		RecName: Full=RNA-binding protein 24; AltName: Full=RNA-binding motif protein 24; AltName: Full=RNA-binding protein SEB-4
LOC_Os06g29700	2.37337	4.71e-24	1.59e-19	yes	up	1.09667	5.65667	1.04	1.13	1.12	5.57	5.16	6.24		RecName: Full=F-box/FBD/LRR-repeat protein At5g22700
LOC_Os03g39740	1.54021	5.37e-24	1.82e-19	yes	up	7.11667	21.91	7.26	7.46	6.63	20.87	20.74	24.12		_
LOC_Os07g39530	5.37542	6.07e-24	2.05e-19	yes	up	0.0933333	4.10667	0.15	0.03	0.1	2.85	2.8	6.67		RecName: Full=BTB/POZ domain-containing protein At5g48130
LOC_Os05g48890	2.90721	6.87e-24	2.32e-19	yes	up	1.27333	10.1933	1.21	1.19	1.42	10.09	10.44	10.05		RecName: Full=Fasciclin-like arabinogalactan protein 9; Flags: Precursor
LOC_Os12g37580	2.44605	7.24e-24	2.45e-19	yes	up	0.493333	2.82	0.36	0.54	0.58	2.97	2.64	2.85		RecName: Full=ABC transporter C family member 10; Short=ABC transporter ABCC.10; Short=AtABCC10; AltName: Full=ATP-energized glutathione S-conjugate pump 14; AltN
LOC_Os01g71690	1.80819	7.43e-24	2.51e-19	yes	up	1.65	6.13667	1.68	1.56	1.71	6.32	6.08	6.01		RecName: Full=DNA repair protein recA homolog 2, mitochondrial; AltName: Full=Recombinase A homolog 2; Flags: Precursor
LOC_Os01g71820	6.56055	7.46e-24	2.52e-19	yes	up	0.123333	19.1033	0.16	0.08	0.13	16.29	17.02	24		RecName: Full=Glucan endo-1,3-beta-glucosidase GV; AltName: Full=(1-)3)-beta-glucan endohydrolase GV; AltName: Full=(1-)3)-beta-glucanase isoenzyme GV; AltName: Full
LOC_Os03g58810	1.23944	9.1e-24	3.08e-19	yes	up	22.0633	54.4967	21.65	22.97	21.57	54.81	52.11	56.57		RecName: Full=DEAD-box ATP-dependent RNA helicase 27
LOC_Os02g02850	1.45049	9.6e-24	3.25e-19	yes	up	11.67	33.9133	10.62	12.86	11.53	34.36	33.43	33.95		RecName: Full=Bifunctional protein FolD 4, chloroplastic; AltName: Full=Protein EMBRYO DEFECTIVE 3127; AltName: Full=Tetrahydrofolate dehydrogenase/cyclohydrolase
LOC_Os01g39136	5.822	1.01e-23	3.4e-19	yes	up	0.0533333	4.17	0.06	0.03	0.07	2.69	3.63	6.19		_
LOC_Os01g52390	1.17901	1.13e-23	3.81e-19	yes	up	105.94	255.717	107.75	105.64	104.43	253.6	251.22	262.33		_
LOC_Os04g54430	1.3059	1.52e-23	5.14e-19	yes	up	145.61	385.283	134.83	155.01	146.99	408.5	385.02	362.33		RecName: Full=Phosphopantothenoylcysteine decarboxylase subunit VHS3; AltName: Full=Viable in a HAL3 SIT4 background protein 3
LOC_Os04g30160	5.44005	2.08e-23	7.04e-19	yes	up	0.0533333	2.48667	0.08	0.06	0.02	2.27	2.76	2.43		RecName: Full=Wall-associated receptor kinase-like 10; Flags: Precursor
LOC_Os02g37870	1.47972	2.12e-23	7.17e-19	yes	up	27.1133	80.5	24.84	30.12	26.38	84.36	82.63	74.51		RecName: Full=Ribosome biogenesis protein BRX1
LOC_Os11g29380	2.37311	2.34e-23	7.92e-19	yes	up	24.0333	133.01	26.29	29.66	16.15	123.31	119.3	156.42		RecName: Full=DNA replication licensing factor MCM2; AltName: Full=Minichromosome maintenance protein 2; Short=OsMCM2
LOC_Os03g22320	1.53299	2.67e-23	9.04e-19	yes	up	10.16	32.0167	9.81	11.47	9.2	34.87	31.55	29.63		RecName: Full=U3 small nucleolar RNA-associated protein 14; Short=U3 snoRNA-associated protein 14; AltName: Full=U three protein 14
LOC_Os01g41240	2.9993	2.71e-23	9.17e-19	yes	up	2.08667	17.8533	2.87	1.33	2.06	19.33	19.49	14.74		RecName: Full=Probable strigolactone esterase D14; AltName: Full=Protein DWARF-14; AltName: Full=Protein DWARF-88; AltName: Full=Protein HIGH-TILLERING DWARF 2
LOC_Os05g10930	2.18319	2.83e-23	9.57e-19	yes	up	17.91	87.5833	13.35	18.81	21.57	72.47	84.21	106.07		RecName: Full=Glutaredoxin-C7
LOC_Os02g46990	1.30238	2.88e-23	9.74e-19	yes	up	16.26	42.59	15.97	16.67	16.14	44.09	42.87	40.81		RecName: Full=ATPase family AAA domain-containing protein 3
LOC_Os02g21660	1.22029	2.96e-23	9.99e-19	yes	up	119.023	296.54	111.1	117.4	128.57	304.43	282.33	302.86		RecName: Full=60S ribosomal protein L10a-1
LOC_Os03g11420	2.93443	3.49e-23	1.18e-18	yes	up	8.05	65.62	9.39	8.92	5.84	78.15	79.43	39.28		RecName: Full=Beta-glucosidase 6; Short=Os3bglu6; Flags: Precursor
LOC_Os10g35290	1.24381	3.62e-23	1.22e-18	yes	up	14.2067	35.2067	12.91	15.15	14.56	34.21	34.33	37.08		RecName: Full=Probable DNA-directed RNA polymerase I subunit RPA2; AltName: Full=DNA-directed RNA polymerase I polypeptide 2; Short=RNA polymerase I subunit 2
LOC_Os11g47770	2.38891	3.63e-23	1.23e-18	yes	up	6.95	39.0167	4.95	9.2	6.7	38.18	35.45	43.42		_
LOC_Os04g48130	2.1667	3.93e-23	1.33e-18	yes	up	2.69333	12.94	2.82	2.4	2.86	12.86	14.33	11.63		RecName: Full=Inactive rhomboid protein 1; Short=iRhom1; AltName: Full=Rhomboid family member 1
LOC_Os02g10500	3.27464	4.19e-23	1.42e-18	yes	up	1.94333	20.1533	2	1.64	2.19	21.57	22.3	16.59		_
LOC_Os03g46640	2.08305	6.49e-23	2.19e-18	yes	up	50.68	229.537	39.46	58.16	54.42	197.55	193.76	297.3		RecName: Full=Deoxyuridine 5'-triphosphate nucleotidohydrolase; Short=dUTPase; AltName: Full=dUTP pyrophosphatase
LOC_Os12g01370	2.64503	6.87e-23	2.32e-18	yes	up	2.96667	19.7667	3.76	2.69	2.45	22.24	22.62	14.44		RecName: Full=Omega-3 fatty acid desaturase, chloroplastic; Flags: Precursor
LOC_Os02g37862	1.1297	7.48e-23	2.53e-18	yes	up	287.38	671.963	275.23	298.44	288.47	690.09	650.1	675.7		RecName: Full=60S ribosomal protein L6-3
LOC_Os04g19114	5.14591	7.69e-23	2.6e-18	yes	up	0.0633333	2.19333	0.05	0.09	0.05	1.74	1.48	3.36		RecName: Full=Retrovirus-related Pol polyprotein from transposon 17.6; Includes: RecName: Full=Protease; Includes: RecName: Full=Reverse transcriptase; Includes: RecN
LOC_Os03g22730	1.23621	1.03e-22	3.47e-18	yes	up	63.1633	158.04	60.06	66.56	62.87	165.85	159.46	148.81		RecName: Full=Probable nucleolar protein 5-2; AltName: Full=MAR-binding NOP56/58 homolog 2; AltName: Full=Nucleolar protein 58-2
LOC_Os04g40050	2.18338	1.08e-22	3.66e-18	yes	up	6.87333	32.4633	4.89	9.05	6.68	33.09	29.66	34.64		_
LOC_Os07g44190	1.3619	1.17e-22	3.97e-18	yes	up	50.22	137.183	46.55	56.75	47.36	140.73	129.58	141.24		RecName: Full=H/ACA ribonucleoprotein complex subunit 4; AltName: Full=CBF5 homolog; AltName: Full=Dyskerin; AltName: Full=Nopp-140-associated protein of 57 kDa hom
LOC_Os07g44640	1.37989	1.23e-22	4.16e-18	yes	up	10.2267	28.2367	9.32	11.25	10.11	27.71	28.92	28.08		RecName: Full=Probable protein arginine N-methyltransferase 3
LOC_Os03g22880	1.25659	1.24e-22	4.18e-18	yes	up	94.0167	238.923	89.34	103.47	89.24	244.14	232.28	240.35		RecName: Full=Nucleolar protein 56; AltName: Full=Nucleolar protein 5A
LOC_Os03g55200	2.10963	1.58e-22	5.33e-18	yes	up	1.95333	8.99	1.79	2.21	1.86	8.08	8.33	10.56		_
LOC_Os02g53400	3.14598	1.6e-22	5.4e-18	yes	up	1.30667	17.9667	1.93	0.9	1.09	21.87	21.18	10.85		RecName: Full=Thioredoxin-like 3-1, chloroplastic
LOC_Os03g24730	2.06424	1.67e-22	5.63e-18	yes	up	1.60333	7.17	1.85	1.52	1.44	6.54	6.7	8.27		_
LOC_Os07g40930	1.50547	1.69e-22	5.71e-18	yes	up	16.7733	50.6967	15.53	18.69	16.1	51.63	53.9	46.56		RecName: Full=Ribosome biogenesis protein WDR12 homolog, partial
LOC_Os03g46090	1.78473	2.64e-22	8.94e-18	yes	up	8.77333	32.0867	8.8	9.01	8.51	35.61	35.06	25.59		RecName: Full=Type I inositol 1,4,5-trisphosphate 5-phosphatase CVP2; AltName: Full=Protein COTYLEDON VASCULAR PATTERN 2
LOC_Os11g38480	2.88794	3.27e-22	1.1e-17	yes	up	2.01	9.75	1.91	1.94	2.18	7.4	8.35	13.5		_
LOC_Os07g08330	1.14936	3.45e-22	1.17e-17	yes	up	250.47	591.217	249.75	260.43	241.23	601.49	572.7	599.46		RecName: Full=60S ribosomal protein L4-1; Short=L1
LOC_Os11g03990	1.79655	3.99e-22	1.35e-17	yes	up	12.07	44.8367	13.84	11.2	11.17	39.84	41.92	52.75		RecName: Full=Glutamate-rich WD repeat-containing protein 1
LOC_Os08g04230	6.04955	4.03e-22	1.36e-17	yes	up	0.07	4.80333	0.03	0.08	0.1	5.68	4.56	4.17		RecName: Full=Cysteine-rich repeat secretory protein 55; Flags: Precursor
LOC_Os03g11510	11.6304	4.34e-22	1.47e-17	yes	up	0	17.02	0	0	0	19.53	18.44	13.09		RecName: Full=Mitochondrial substrate carrier family protein U
LOC_Os12g38750	3.26476	4.39e-22	1.49e-17	yes	up	0.4	4.17333	0.45	0.45	0.3	5.03	4.14	3.35		RecName: Full=Probable inactive purple acid phosphatase 1; Flags: Precursor
LOC_Os01g60280	2.23271	4.79e-22	1.62e-17	yes	up	1.23667	6.19	1.35	0.97	1.39	5.19	6.04	7.34		RecName: Full=Probable LRR receptor-like serine/threonine-protein kinase At1g06840; Flags: Precursor
LOC_Os08g39810	5.40843	4.82e-22	1.63e-17	yes	up	0.176667	8.3	0.18	0.17	0.18	4.33	4.59	15.98		RecName: Full=Lysine-specific demethylase 8; AltName: Full=JmjC domain-containing protein 5; AltName: Full=Jumonji domain-containing protein 5
LOC_Os01g11550	1.73357	5.12e-22	1.73e-17	yes	up	25.0933	88.75	28.14	21.53	25.61	96.43	93.12	76.7		RecName: Full=Transcription factor PCF5
LOC_Os06g43930	3.35715	6.44e-22	2.18e-17	yes	up	0.333333	3.64667	0.38	0.35	0.27	3.29	4.44	3.21		RecName: Full=Lysosomal Pro-X carboxypeptidase; AltName: Full=Proline carboxypeptidase; AltName: Full=Prolylcarboxypeptidase; Short=PRCP; Flags: Precursor
LOC_Os12g32470	1.97845	7.38e-22	2.5e-17	yes	up	3.70333	15.6467	2.91	4.1	4.1	16.54	16.6	13.8		_
LOC_Os02g42310	2.02213	7.58e-22	2.57e-17	yes	up	2.53333	10.3567	2.39	2.78	2.43	9.45	9.56	12.06		RecName: Full=Serine carboxypeptidase-like 35; Flags: Precursor
LOC_Os10g34840	2.83083	8.53e-22	2.88e-17	yes	up	3.49667	26.5967	3.9	3.1	3.49	25.99	35.1	18.7		RecName: Full=Ripening-related protein 3; Flags: Precursor
LOC_Os02g15820	2.4486	9.26e-22	3.13e-17	yes	up	1.50667	8.81	1.77	1.79	0.96	8.6	8.87	8.96		_
LOC_Os02g57590	1.20301	9.5e-22	3.21e-17	yes	up	81.4533	199.37	74.36	84.16	85.84	190.98	212.36	194.77		RecName: Full=Probable mediator of RNA polymerase II transcription subunit 36b; AltName: Full=Histone-glutamine methyltransferase; AltName: Full=SKP1-interacting p
LOC_Os11g36960	1.64411	9.73e-22	3.29e-17	yes	up	14.35	46.9367	14.59	16.14	12.32	46.17	42.59	52.05		_
LOC_Os09g24220	2.01407	1.06e-21	3.6e-17	yes	up	3.37	14.46	2.93	4.33	2.85	13.03	13.36	16.99		RecName: Full=DNA mismatch repair protein MSH6; Short=AtMSH6; AltName: Full=MutS protein homolog 6
LOC_Os01g10690	2.29365	1.1e-21	3.73e-17	yes	up	4.71	24.56	3.86	6.01	4.26	20.81	20.8	32.07		_
LOC_Os01g56940	2.1367	1.11e-21	3.76e-17	yes	up	2.1	9.74	1.91	2.71	1.68	10.27	8.48	10.47		RecName: Full=Exonuclease 1; AltName: Full=OsEXO-1
LOC_Os11g43760	2.52165	1.17e-21	3.96e-17	yes	up	0.646667	4.12333	0.68	0.55	0.71	4.09	4.48	3.8		RecName: Full=Sn1-specific diacylglycerol lipase alpha; Short=DGL-alpha; AltName: Full=Neural stem cell-derived dendrite regulator
LOC_Os08g01680	1.95309	1.23e-21	4.17e-17	yes	up	7.36	29.5667	6.38	8.91	6.79	26.61	27.92	34.17		RecName: Full=Chromatin assembly factor 1 subunit FAS2 homolog; Short=CAF-1 subunit FAS2 homolog; AltName: Full=CAF-1 p60 homolog; AltName: Full=Protein FASCIATA 2
LOC_Os03g58720	1.51331	1.43e-21	4.84e-17	yes	up	6.61333	20.0167	5.59	7.67	6.58	19.43	19.5	21.12		RecName: Full=RNA-binding protein 28; AltName: Full=RNA-binding motif protein 28
LOC_Os03g08410	8.24693	1.53e-21	5.18e-17	yes	up	0.0333333	8.70333	0.06	0.02	0.02	11.82	11.64	2.65		RecName: Full=Probable flavin-containing monooxygenase 1
LOC_Os01g65830	1.42206	1.56e-21	5.29e-17	yes	up	10.0933	28.7533	9.17	10.02	11.09	28.99	28.16	29.11		RecName: Full=Acyl-
LOC_Os02g48630	2.37352	1.72e-21	5.82e-17	yes	up	16.7333	91.98	15.77	18.23	16.2	110.81	107.11	58.02		_
LOC_Os06g30320	1.31752	1.81e-21	6.11e-17	yes	up	9.79333	25.9533	9.85	10.11	9.42	26.76	24.37	26.73		RecName: Full=Nucleolar complex-associated protein 3
LOC_Os05g02810	2.78259	1.87e-21	6.34e-17	yes	up	1.76667	12.9133	1.29	2.05	1.96	10.04	10.99	17.71		_
LOC_Os03g19000	4.00454	1.9e-21	6.44e-17	yes	up	0.403333	6.91	0.58	0.18	0.45	7.16	6.65	6.92		RecName: Full=Peroxisomal membrane protein 11-2; AltName: Full=OsPEX11-2; AltName: Full=OsPEX11-5; AltName: Full=Peroxin-11-2
LOC_Os05g30570	4.79994	2.03e-21	6.87e-17	yes	up	0.146667	4.46	0.09	0.21	0.14	5.29	3.6	4.49		_
LOC_Os09g39780	1.65736	2.3e-21	7.78e-17	yes	up	41.2833	139.387	34.22	42.51	47.12	153.91	124.04	140.21		RecName: Full=Peptidyl-prolyl cis-trans isomerase CYP19-3; Short=PPIase CYP19-3; AltName: Full=Cyclophilin of 19 kDa 3; AltName: Full=Cyclophilin-4; AltName: Full=
LOC_Os12g43600	1.22868	2.36e-21	8e-17	yes	up	2398.21	6016.95	2165.25	2338.88	2690.51	6111.48	5686.04	6253.32		RecName: Full=Glycine-rich RNA-binding protein 2
LOC_Os01g70110	2.51458	2.43e-21	8.23e-17	yes	up	16.76	103.437	22.24	10.29	17.75	89.94	105.15	115.22		RecName: Full=NAC domain-containing protein 68; Short=ONAC068
LOC_Os05g32760	1.42464	2.69e-21	9.09e-17	yes	up	13.48	38.3433	11.29	14.88	14.27	38.18	35.78	41.07		RecName: Full=Actin cytoskeleton-regulatory complex protein PAN1
LOC_Os01g10580	2.30887	2.76e-21	9.33e-17	yes	up	1.62	8.28667	1.36	1.89	1.61	8.71	8.81	7.34		RecName: Full=Probable salt tolerance-like protein At1g78600
LOC_Os02g19850	2.0486	2.85e-21	9.63e-17	yes	up	1.25667	6.63333	1.29	1.31	1.17	6.1	6.45	7.35		_
LOC_Os03g58800	1.9086	3.2e-21	1.08e-16	yes	up	4.00333	16.0533	4.8	3.44	3.77	14.95	16.77	16.44		RecName: Full=Mitochondrial chaperone BCS1; Short=h-BCS1; AltName: Full=BCS1-like protein
LOC_Os04g36890	1.20656	3.44e-21	1.16e-16	yes	up	34.93	85.9367	34.74	36.62	33.43	88.41	83.39	86.01		RecName: Full=Peptidyl-prolyl cis-trans isomerase FKBP53; Short=PPIase FKBP53; AltName: Full=FK506-binding protein 53; Short=AtFKBP53; AltName: Full=Immunophilin F
LOC_Os02g11760	2.18059	3.45e-21	1.17e-16	yes	up	15.2267	21.59	9.26	26.37	10.05	21.67	22.93	20.17		RecName: Full=Putative pleiotropic drug resistance protein 7
LOC_Os12g41390	1.39386	3.76e-21	1.27e-16	yes	up	136.613	382.797	146.25	125.28	138.31	370.05	421.45	356.89		RecName: Full=Homocysteine S-methyltransferase 3; AltName: Full=S-methylmethionine:homocysteine methyltransferase 3; Short=SMM:Hcy S-methyltransferase 3; AltName: F
LOC_Os04g40970	2.2888	3.94e-21	1.33e-16	yes	up	1.65	8.56	1.3	2.28	1.37	7.49	8.61	9.58		RecName: Full=ATP-dependent DNA helicase Q-like 5; AltName: Full=RecQ-like protein 5; Short=AtRecQ5; Short=AtRecQl5
LOC_Os08g40930	1.83419	4.14e-21	1.4e-16	yes	up	3.82333	13.8567	2.99	4	4.48	15.02	15.08	11.47		RecName: Full=Isoamylase 1, chloroplastic; Short=AtISA1; Flags: Precursor
LOC_Os09g29710	7.5504	4.23e-21	1.43e-16	yes	up	0.0966667	19.7967	0.22	0.07	0	11.73	21.79	25.87		RecName: Full=EG45-like domain containing protein; AltName: Full=Blight-associated protein p12; AltName: Full=Plant natriuretic peptide; Short=PNP; Flags: Precursor
LOC_Os01g71270	2.61263	4.59e-21	1.55e-16	yes	up	1.58	10.35	2.18	1.31	1.25	11.71	10.32	9.02		RecName: Full=Eukaryotic peptide chain release factor subunit 1-3; Short=Eukaryotic release factor 1-3; Short=eRF1-3; AltName: Full=Omnipotent suppressor protein 1 h
LOC_Os11g40590	1.71026	4.74e-21	1.6e-16	yes	up	10.24	35.5	10.37	10.13	10.22	37.79	40.42	28.29		RecName: Full=Loricrin
LOC_Os04g52530	1.87079	5.66e-21	1.91e-16	yes	up	10.21	39.8667	11.84	8.85	9.94	34.03	44.52	41.05		_
LOC_Os03g58350	2.16155	5.67e-21	1.92e-16	yes	up	6.98667	29.8733	8.23	7.44	5.29	25.69	34.72	29.21		RecName: Full=Auxin-responsive protein IAA14; AltName: Full=Indoleacetic acid-induced protein 14
LOC_Os04g12480	1.74282	6.6e-21	2.23e-16	yes	up	4.70333	16.7233	3.88	5.78	4.45	16.11	15.62	18.44		RecName: Full=Pumilio homolog 2; Short=APUM-2; Short=AtPUM2
LOC_Os05g43830	1.34318	7.35e-21	2.49e-16	yes	up	13.8367	37.3767	14.21	13.56	13.74	38.29	38.57	35.27		RecName: Full=Proline iminopeptidase; Short=PIP; AltName: Full=Prolyl aminopeptidase; Short=PAP
LOC_Os05g39960	1.20289	7.55e-21	2.55e-16	yes	up	405.023	980.81	384.4	408.03	422.64	1021.98	873.33	1047.12		RecName: Full=40S ribosomal protein S26; AltName: Full=S31
LOC_Os01g60790	1.13812	8.46e-21	2.86e-16	yes	up	195.097	459.767	184.93	192.1	208.26	475.93	449.28	454.09		RecName: Full=40S ribosomal protein S26; AltName: Full=S31
LOC_Os05g11710	1.06174	8.74e-21	2.96e-16	yes	up	155.64	347.267	148.64	154.18	164.1	340.24	339.33	362.23		RecName: Full=60S ribosomal protein L11
LOC_Os05g47540	1.90837	8.77e-21	2.96e-16	yes	up	43.7833	174.313	44.25	43.8	43.3	200.99	195.06	126.89		RecName: Full=Phosphomethylethanolamine N-methyltransferase; Short=AtPMEAMT; AltName: Full=Phosphoethanolamine N-methyltransferase 2
LOC_Os11g04830	4.0371	8.98e-21	3.04e-16	yes	up	0.343333	6	0.38	0.38	0.27	5.99	9.36	2.65		_
LOC_Os02g40500	3.00821	1.27e-20	4.29e-16	yes	up	3.26667	31.5333	4.71	2.45	2.64	31.09	37.23	26.28		RecName: Full=Glutaredoxin-C4, chloroplastic; AltName: Full=Glutaredoxin-C2 homolog 2; Flags: Precursor
LOC_Os07g07709	1.15387	1.28e-20	4.32e-16	yes	up	200.517	478.573	205.84	190.49	205.22	480.02	482.75	472.95		RecName: Full=40S ribosomal protein S18
LOC_Os12g37519	3.47786	1.31e-20	4.45e-16	yes	up	1.94	22.8867	3.44	1.23	1.15	27.92	21.91	18.83		_
LOC_Os08g41780	2.99152	1.41e-20	4.78e-16	yes	up	2.18	18.7533	3.43	1.5	1.61	15.26	20.05	20.95		RecName: Full=Triacylglycerol lipase 2; Flags: Precursor
LOC_Os05g49620	3.72272	1.41e-20	4.78e-16	yes	up	1.33	18.7867	0.91	1.35	1.73	16.83	28.92	10.61		RecName: Full=Probable WRKY transcription factor 41; AltName: Full=WRKY DNA-binding protein 41
LOC_Os12g10670	1.78672	1.47e-20	4.96e-16	yes	up	2.36667	8.65667	2.11	2.9	2.09	8.84	9.2	7.93		RecName: Full=Protein STICHEL
LOC_Os03g52284	3.53987	1.65e-20	5.58e-16	yes	up	0.473333	5.97333	0.82	0.34	0.26	5.24	6	6.68		_
LOC_Os11g47320	1.64451	2e-20	6.75e-16	yes	up	6.30667	20.8633	5.5	7.72	5.7	20.39	19.27	22.93		RecName: Full=Protein dopey homolog PFC0245c
LOC_Os07g04150	1.43324	2.01e-20	6.8e-16	yes	up	24.84	71.3967	24.32	22.11	28.09	64.98	69.33	79.88		_
LOC_Os03g27260	1.04663	2.16e-20	7.32e-16	yes	up	202.367	446.55	195.83	202.46	208.81	448.14	426.84	464.67		RecName: Full=40S ribosomal protein S6
LOC_Os02g35940	2.18057	2.26e-20	7.64e-16	yes	up	2.20667	10.63	2.19	1.87	2.56	11.11	10.48	10.3		RecName: Full=Tuliposide A-converting enzyme 2, chloroplastic; Short=TgTCEA2; Flags: Precursor
LOC_Os08g38160	2.14557	2.36e-20	7.98e-16	yes	up	4.71333	23.9533	3.72	5.98	4.44	26.06	22.51	23.29		RecName: Full=UDP-glycosyltransferase 89A2
LOC_Os11g11390	1.13074	2.68e-20	9.07e-16	yes	up	152.66	357.603	155.18	149.4	153.4	335.12	376.66	361.03		RecName: Full=60S ribosomal protein L10-1; AltName: Full=Protein QM; AltName: Full=Putative tumor suppressor SC34
LOC_Os07g01860	1.57035	2.81e-20	9.51e-16	yes	up	5.67	17.8333	4.57	6.67	5.77	18.26	16.55	18.69		RecName: Full=Protein LONGIFOLIA 1; AltName: Full=Protein TON1 RECRUITING MOTIF 2
LOC_Os12g06910	1.4006	3.01e-20	1.02e-15	yes	up	10.44	29.2	9.54	11.45	10.33	31.98	29.21	26.41		RecName: Full=Nucleolar protein 6; AltName: Full=Nucleolar RNA-associated protein; Short=Nrap
LOC_Os07g32350	1.38396	3.18e-20	1.08e-15	yes	up	13.8967	39.4567	14.13	13.81	13.75	42.41	38.67	37.29		_
LOC_Os11g05370	1.23607	3.29e-20	1.11e-15	yes	up	210.59	540.22	213.36	207.27	211.14	530.14	482.59	607.93		RecName: Full=60S ribosomal protein L26-1
LOC_Os07g31500	2.35385	3.47e-20	1.17e-15	yes	up	16.1967	95.6933	23.41	15.13	10.05	117.66	94.35	75.07		RecName: Full=LRR receptor-like serine/threonine-protein kinase GSO1; AltName: Full=Protein GASSHO 1; Flags: Precursor
LOC_Os03g08580	3.10196	3.77e-20	1.27e-15	yes	up	3.65	33.16	4.93	3.5	2.52	37.16	43.3	19.02		_
LOC_Os01g12440	2.67651	4.56e-20	1.54e-15	yes	up	1.15333	7.83333	0.71	1.59	1.16	7.46	8.75	7.29		RecName: Full=Ethylene-responsive transcription factor CRF2; AltName: Full=Protein CYTOKININ RESPONSE FACTOR 2
LOC_Os02g44130	1.83097	5.13e-20	1.74e-15	yes	up	4.13	15.6533	4.09	3.79	4.51	16.25	13.45	17.26		RecName: Full=Zinc finger protein ZAT2; AltName: Full=Protein DUO1-ACTIVATED ZINC FINGER 1
LOC_Os01g03740	3.10361	5.28e-20	1.79e-15	yes	up	0.246667	2.25	0.29	0.27	0.18	1.92	2.31	2.52		RecName: Full=Endonuclease 2; Short=AtENDO2; AltName: Full=Deoxyribonuclease ENDO2; AltName: Full=Single-stranded-nucleate endonuclease ENDO2; Flags: Precursor
LOC_Os09g20240	2.06206	6.28e-20	2.12e-15	yes	up	2.54667	11.3167	2.2	2.7	2.74	10.79	12.37	10.79		_
LOC_Os03g60509	1.84854	6.41e-20	2.17e-15	yes	up	71.7333	276.377	68.32	55.41	91.47	269.61	305.03	254.49		RecName: Full=Chalcone--flavonone isomerase; Short=Chalcone isomerase
LOC_Os06g21480	1.34867	6.47e-20	2.19e-15	yes	up	58.7	160.15	51.64	56.68	67.78	151.42	161.44	167.59		RecName: Full=60S ribosomal protein L31
LOC_Os03g02740	2.17514	6.79e-20	2.3e-15	yes	up	5.71333	27.2233	3.76	7.66	5.72	29.07	28.63	23.97		RecName: Full=Phospholipase D beta 1; Short=AtPLDbeta1; Short=PLD beta 1; Short=PLDbeta
LOC_Os06g43620	1.70299	6.82e-20	2.31e-15	yes	up	4.37333	15.1333	4.56	4.93	3.63	13.99	14.24	17.17		RecName: Full=Adiponectin receptor protein
LOC_Os05g27940	1.0589	7.4e-20	2.5e-15	yes	up	131.573	292.733	128.65	132.79	133.28	283.74	305.39	289.07		RecName: Full=40S ribosomal protein S7
LOC_Os02g40460	1.41382	7.74e-20	2.62e-15	yes	up	14.36	38.0367	10.71	15.31	17.06	39.94	38.97	35.2		RecName: Full=Polyribonucleotide nucleotidyltransferase 2, mitochondrial; AltName: Full=Polynucleotide phosphorylase 2; Short=PNPase 2; Flags: Precursor
LOC_Os03g54130	3.87931	7.81e-20	2.64e-15	yes	up	0.32	5.02333	0.43	0.15	0.38	4.19	4.5	6.38		RecName: Full=Cysteine protease 1; AltName: Full=OsCP1; Flags: Precursor
LOC_Os11g47130	1.86842	8.2e-20	2.77e-15	yes	up	4.70333	18.2567	4.37	5.96	3.78	17.54	16.55	20.68		RecName: Full=Nuclear polyadenylated RNA-binding protein 3
LOC_Os03g01008	2.31799	8.82e-20	2.98e-15	yes	up	1.74	9.30667	1.84	1.73	1.65	8.6	7.35	11.97		_
LOC_Os09g29630	1.183	9.16e-20	3.1e-15	yes	up	15.3433	37.1	14.73	16.43	14.87	38.27	35.66	37.37		RecName: Full=tRNA (cytosine(34)-C(5))-methyltransferase; AltName: Full=Myc-induced SUN domain-containing protein; Short=Misu; AltName: Full=NOL1/NOP2/Sun domain
LOC_Os03g63400	1.11147	9.18e-20	3.11e-15	yes	up	87.14	201.303	81.73	87.86	91.83	206.54	196.69	200.68		RecName: Full=Transcription factor BTF3; AltName: Full=Nascent polypeptide-associated complex subunit beta; Short=NAC-beta; AltName: Full=RNA polymerase B transcripti
LOC_Os09g21420	3.33578	9.72e-20	3.29e-15	yes	up	0.306667	3.28333	0.14	0.5	0.28	3.52	3.15	3.18		RecName: Full=Zinc finger BED domain-containing protein RICESLEEPER 2; AltName: Full=Transposase-like protein RICESLEEPER 2
LOC_Os06g41030	1.16776	1.03e-19	3.48e-15	yes	up	120.297	286.163	115.3	131.94	113.65	293.96	250.65	313.88		_
LOC_Os08g15030	1.46164	1.17e-19	3.95e-15	yes	up	12.82	37.66	11.92	14.73	11.81	37.13	35.85	40		RecName: Full=Aspartate carbamoyltransferase, chloroplastic; AltName: Full=Aspartate transcarbamylase; Short=ATCase; Flags: Precursor
LOC_Os08g13690	1.06219	1.17e-19	3.95e-15	yes	up	236.657	527.34	234.2	244.54	231.23	516.13	547.18	518.71		RecName: Full=60S ribosomal protein L7-3
LOC_Os01g68440	1.87772	1.19e-19	4.02e-15	yes	up	3.00667	10.6367	2.41	2.93	3.68	11.91	9.12	10.88		RecName: Full=snRNA-activating protein complex subunit; Short=SNAPc subunit; AltName: Full=Protein SHOOT REDIFFERENTIATION DEFECTIVE 2
LOC_Os04g43300	2.24361	1.21e-19	4.1e-15	yes	up	6.87	34.6067	5.48	8.8	6.33	29.78	27.31	46.73		RecName: Full=Protein BREAST CANCER SUSCEPTIBILITY 1 homolog; Short=AtBRCA1
LOC_Os03g29240	1.63446	1.3e-19	4.41e-15	yes	up	28.0533	92.32	32.39	28.85	22.92	84.29	98.37	94.3		RecName: Full=Probable nucleoredoxin 1-2; Short=OsNrx1-2
LOC_Os11g32110	1.53942	1.33e-19	4.5e-15	yes	up	42.8967	132.67	45.61	47.29	35.79	138.05	138.42	121.54		RecName: Full=Auxin response factor 23; AltName: Full=OsARF1
[truncated: 1,069 more rows]

## Sheet: Sheet
Table S4. The 1287 PTRGs expressed in both pistil and anther.
[truncated: 1,289 more rows]
