# Supplementary material for: Identification and Analysis of Genes Involved in Double Fertilization in Rice
Source: Int J Mol Sci. 2021 Nov 27;22(23):12850. doi: 10.3390/ijms222312850 (PMC8657449; doi:10.3390/ijms222312850)
Supplement: Supplementary file 1 [file ijms-22-12850-s001.zip › Table S5. GO enrichment analysis of the 1287 PTRGs expressed in both pistil and anther..xls]

## Sheet: Sheet1
Table S5. GO enrichment analysis of the 1287 PTRGs expressed in both pistil and anther.
GO ID	Term Type	Description	p-adjust	Gene Number	Type
GO:0042545	BP	cell wall modification	0.00135749	10	Cell wall
GO:0071555	BP	cell wall organization	0.0086109	33
GO:0071554	BP	cell wall organization or biogenesis	0.011327	38
GO:0045488	BP	pectin metabolic process	0.000935304	15	Pectin
GO:0045490	BP	pectin catabolic process	0.000935304	13
GO:0010393	BP	galacturonan metabolic process	0.000935304	15	Carbohydrate
GO:0005975	BP	carbohydrate metabolic process	0.00135749	94
GO:0005992	BP	trehalose biosynthetic process	0.00218116	8
GO:0005991	BP	trehalose metabolic process	0.00273593	8
GO:0005976	BP	polysaccharide metabolic process	0.00550242	33
GO:0046351	BP	disaccharide biosynthetic process	0.0117114	8
GO:0009312	BP	oligosaccharide biosynthetic process	0.0220057	8
GO:2000022	BP	regulation of jasmonic acid mediated signaling pathway	0.000935304	8	Signal transduction
GO:0009966	BP	regulation of signal transduction	0.0124993	13
GO:0023051	BP	regulation of signaling	0.0124993	13
GO:0010646	BP	regulation of cell communication	0.0137042	13
GO:0000165	BP	MAPK cascade	0.0394963	5
GO:0007165	BP	signal transduction	0.0492991	60
GO:0010817	BP	regulation of hormone levels	0.01826	20	Hormone
GO:0009611	BP	response to wounding	0.000935304	11	Response
GO:0034599	BP	cellular response to oxidative stress	0.00349934	9
GO:0070887	BP	cellular response to chemical stimulus	0.0117114	10
GO:0031347	BP	regulation of defense response	0.0124993	10
GO:0080134	BP	regulation of response to stress	0.0137042	12
GO:0048583	BP	regulation of response to stimulus	0.0199255	18
GO:0042221	BP	response to chemical	0.0343763	31
GO:0043086	BP	negative regulation of catalytic activity	0.00135749	20
GO:0016311	BP	dephosphorylation	0.00138972	33
GO:0006470	BP	protein dephosphorylation	0.00143223	21
GO:0065007	BP	biological regulation	0.00143223	213
GO:0044092	BP	negative regulation of molecular function	0.00187707	20
GO:0045229	BP	external encapsulating structure organization	0.00287306	35
GO:0006662	BP	glycerol ether metabolic process	0.0117114	7
GO:0018904	BP	ether metabolic process	0.0117114	7
GO:0055114	BP	oxidation-reduction process	0.0137042	105
GO:0065008	BP	regulation of biological quality	0.0178134	53
GO:0006793	BP	phosphorus metabolic process	0.01826	145
GO:0072330	BP	monocarboxylic acid biosynthetic process	0.0223038	20
GO:0006796	BP	phosphate-containing compound metabolic process	0.023747	143
GO:0006714	BP	sesquiterpenoid metabolic process	0.0315861	5
GO:0000103	BP	sulfate assimilation	0.0349371	7
GO:0030104	BP	water homeostasis	0.039637	7
GO:0050789	BP	regulation of biological process	0.0431326	167
GO:0071944	CC	cell periphery	0.0285365	6	Cell periphery
GO:0030599	MF	pectinesterase activity	0.000935304	13	Enzyme
GO:0045330	MF	aspartyl esterase activity	0.00135749	10
GO:0004721	MF	phosphoprotein phosphatase activity	0.00135749	22
GO:0004722	MF	protein serine/threonine phosphatase activity	0.00135749	16
GO:0042578	MF	phosphoric ester hydrolase activity	0.00135749	37
GO:0046910	MF	pectinesterase inhibitor activity	0.00208226	9
GO:0016703	MF	oxidoreductase activity, acting on single donors with incorporation of molecular oxygen, incorporation of one atom of oxygen (internal monooxygenases or internal mixed function oxidases)	0.00244482	5
GO:0016791	MF	phosphatase activity	0.00287306	31
GO:0052689	MF	carboxylic ester hydrolase activity	0.00349934	18
GO:0004857	MF	enzyme inhibitor activity	0.0120748	19
GO:0016788	MF	hydrolase activity, acting on ester bonds	0.0135387	67
GO:0010277	MF	chlorophyllide a oxygenase [overall] activity	0.0147087	4
GO:0016701	MF	oxidoreductase activity, acting on single donors with incorporation of molecular oxygen	0.01826	10
GO:0016671	MF	oxidoreductase activity, acting on a sulfur group of donors, disulfide as acceptor	0.0245528	8
GO:0004553	MF	hydrolase activity, hydrolyzing O-glycosyl compounds	0.0394963	35
GO:0004707	MF	MAP kinase activity	0.0484658	5
GO:0003714	MF	transcription corepressor activity	0.00550242	7	Transcription activity
GO:0140110	MF	transcription regulator activity	0.0395458	45
GO:0005509	MF	calcium ion binding	0.0191082	32	Calcium
GO:0051537	MF	2 iron, 2 sulfur cluster binding	0.0129663	10
