# Supplementary material for: Identification and Analysis of Genes Involved in Double Fertilization in Rice
Source: Int J Mol Sci. 2021 Nov 27;22(23):12850. doi: 10.3390/ijms222312850 (PMC8657449; doi:10.3390/ijms222312850)
Supplement: Supplementary file 1 [file ijms-22-12850-s001.zip › Table S6. KEGG enrichment analysis of the 1287 PTRGs expressed in both the pistil and the anther..xls]

## Sheet: Sheet1
Table S6. KEGG enrichment analysis of the 1287 PTRGs expressed in both pistil and anther.
Pathway ID	Description	First Category	Second Category	p-adjust	Gene number
map04075	Plant hormone signal transduction	Environmental Information Processing	Signal transduction	2.58178e-07	36
map00500	Starch and sucrose metabolism	Metabolism	Carbohydrate metabolism	0.00013065	27
map00040	Pentose and glucuronate interconversions	Metabolism	Carbohydrate metabolism	0.025132	10
map00053	Ascorbate and aldarate metabolism	Metabolism	Carbohydrate metabolism	0.031687	7
map00906	Carotenoid biosynthesis	Metabolism	Metabolism of terpenoids and polyketides	0.000816879	8
map00592	alpha-Linolenic acid metabolism	Metabolism	Lipid metabolism	0.00925703	9
map00280	Valine, leucine and isoleucine degradation	Metabolism	Amino acid metabolism	0.031687	7
