# Supplementary material for: Identification and Analysis of Genes Involved in Double Fertilization in Rice
Source: Int J Mol Sci. 2021 Nov 27;22(23):12850. doi: 10.3390/ijms222312850 (PMC8657449; doi:10.3390/ijms222312850)
Supplement: Supplementary file 1 [file ijms-22-12850-s001.zip › Table S8. GO enrichment analysis of the 197 PTRGs expressed in pistil but not in anther..xls]

## Sheet: Sheet1
Table S8. GO enrichment analysis of the 197 PTRGs expressed in pistil but not in anther.
GO ID	Term Type	Description	p-value	Gene Number	Type
GO:0060918	BP	auxin transport	1.59445e-05	5	Hormone
GO:0009914	BP	hormone transport	1.59445e-05	5
GO:0009926	BP	auxin polar transport	0.000176505	4
GO:0010817	BP	regulation of hormone levels	0.000227682	7
GO:0009734	BP	auxin-activated signaling pathway	0.000860336	5
GO:0052548	BP	regulation of endopeptidase activity	0.000281867	4	Peptidase
GO:0010951	BP	negative regulation of endopeptidase activity	0.000281867	4
GO:0010466	BP	negative regulation of peptidase activity	0.000454501	4
GO:0052547	BP	regulation of peptidase activity	0.000454501	4
GO:0046620	BP	regulation of organ growth	2.9334e-05	4
GO:0048638	BP	regulation of developmental growth	0.000426157	4
GO:0045861	BP	negative regulation of proteolysis	0.000484163	4
GO:0051346	BP	negative regulation of hydrolase activity	0.000653466	4
GO:0009099	BP	valine biosynthetic process	0.000963794	2
GO:0006573	BP	valine metabolic process	0.00123432	2
GO:0009635	BP	response to herbicide	0.00123432	2
GO:0055114	BP	oxidation-reduction process	0.00132811	22
GO:0009733	BP	response to auxin	0.00154109	4
GO:0040008	BP	regulation of growth	0.00161075	4
GO:0006549	BP	isoleucine metabolic process	0.00223654	2
GO:0009097	BP	isoleucine biosynthetic process	0.00223654	2
GO:0043086	BP	negative regulation of catalytic activity	0.00239061	5
GO:0044092	BP	negative regulation of molecular function	0.00289277	5
GO:0030162	BP	regulation of proteolysis	0.00304239	4
GO:0032269	BP	negative regulation of cellular protein metabolic process	0.00414267	4
GO:0051248	BP	negative regulation of protein metabolic process	0.00414267	4
GO:0050793	BP	regulation of developmental process	0.00474437	5
GO:0009082	BP	branched-chain amino acid biosynthetic process	0.00506477	2
GO:0046470	BP	phosphatidylcholine metabolic process	0.00506477	2
GO:0051336	BP	regulation of hydrolase activity	0.00593163	5
GO:0065008	BP	regulation of biological quality	0.00750468	11
GO:0051239	BP	regulation of multicellular organismal process	0.00810332	4
GO:0009725	BP	response to hormone	0.00873842	5
GO:0009719	BP	response to endogenous stimulus	0.00873842	5
GO:0009636	BP	response to toxic substance	0.0096642	2
GO:0042221	BP	response to chemical	0.0105074	7
GO:0044550	BP	secondary metabolite biosynthetic process	0.0124956	6
GO:0009081	BP	branched-chain amino acid metabolic process	0.0128775	2
GO:0010106	BP	cellular response to iron ion starvation	0.0177658	1
GO:0015854	BP	guanine transport	0.0177658	1
GO:0015853	BP	adenine transport	0.0177658	1
GO:0003002	BP	regionalization	0.0204806	2
GO:0097164	BP	ammonium ion metabolic process	0.0226118	2
GO:0048833	BP	specification of floral organ number	0.0236178	1
GO:0071048	BP	nuclear retention of unspliced pre-mRNA at the site of transcription	0.0236178	1
GO:0010033	BP	response to organic substance	0.0243193	5
GO:0016042	BP	lipid catabolic process	0.0243563	3
GO:0051172	BP	negative regulation of nitrogen compound metabolic process	0.0271509	4
GO:0050790	BP	regulation of catalytic activity	0.0283518	6
GO:0048513	BP	animal organ development	0.0294351	1
GO:0048832	BP	specification of plant organ number	0.0294351	1
GO:1904823	BP	purine nucleobase transmembrane transport	0.0294351	1
GO:0006863	BP	purine nucleobase transport	0.0294351	1
GO:0000350	BP	generation of catalytic spliceosome for second transesterification step	0.0294351	1
GO:0007389	BP	pattern specification process	0.02952	2
GO:0055076	BP	transition metal ion homeostasis	0.0308219	3
GO:0065009	BP	regulation of molecular function	0.0312264	6
GO:0022900	BP	electron transport chain	0.0314258	4
GO:0031324	BP	negative regulation of cellular metabolic process	0.0314258	4
GO:0042737	BP	drug catabolic process	0.0336193	5
GO:0009755	BP	hormone-mediated signaling pathway	0.0348651	5
GO:0015979	BP	photosynthesis	0.0350918	3
GO:0055065	BP	metal ion homeostasis	0.0388713	3
GO:0048878	BP	chemical homeostasis	0.0401325	5
GO:0010605	BP	negative regulation of macromolecule metabolic process	0.0401325	5
GO:0010020	BP	chloroplast fission	0.0409668	1
GO:0015851	BP	nucleobase transport	0.0409668	1
GO:0008298	BP	intracellular mRNA localization	0.0409668	1
GO:0071033	BP	nuclear retention of pre-mRNA at the site of transcription	0.0409668	1
GO:0006403	BP	RNA localization	0.0409668	1
GO:0043572	BP	plastid fission	0.0409668	1
GO:0009605	BP	response to external stimulus	0.0434578	4
GO:0019748	BP	secondary metabolic process	0.0441906	6
GO:0009892	BP	negative regulation of metabolic process	0.0443847	5
GO:0001906	BP	cell killing	0.0466815	1
GO:0044364	BP	disruption of cells of other organism	0.0466815	1
GO:0031640	BP	killing of cells of other organism	0.0466815	1
GO:0072530	BP	purine-containing compound transmembrane transport	0.0466815	1
GO:0050896	BP	response to stimulus	0.0486414	17
GO:0009505	CC	plant-type cell wall	0.00875457	4	Cell wall
GO:0005618	CC	cell wall	0.0106413	7
GO:0005576	CC	extracellular region	0.00359945	10
GO:0030312	CC	external encapsulating structure	0.0106413	7
GO:0071021	CC	U2-type post-spliceosomal complex	0.0236178	1
GO:0071020	CC	post-spliceosomal complex	0.0294351	1
GO:0009539	CC	photosystem II reaction center	0.0409668	1
GO:0004867	MF	serine-type endopeptidase inhibitor activity	0.000325282	4	Peptidase
GO:0061135	MF	endopeptidase regulator activity	0.000653466	4
GO:0004866	MF	endopeptidase inhibitor activity	0.000653466	4
GO:0061134	MF	peptidase regulator activity	0.000907429	4
GO:0030414	MF	peptidase inhibitor activity	0.000907429	4
GO:0048037	MF	cofactor binding	0.00028543	19
GO:0004497	MF	monooxygenase activity	0.00045573	10
GO:0003984	MF	acetolactate synthase activity	0.000520378	2
GO:0020037	MF	heme binding	0.000697553	11
GO:0046906	MF	tetrapyrrole binding	0.00129578	11
GO:0005516	MF	calmodulin binding	0.00207305	5
GO:0016705	MF	oxidoreductase activity, acting on paired donors, with incorporation or reduction of molecular oxygen	0.00231975	9
GO:0016744	MF	transferase activity, transferring aldehyde or ketonic groups	0.00263288	2
GO:0070290	MF	N-acylphosphatidylethanolamine-specific phospholipase D activity	0.00305973	2
GO:0004630	MF	phospholipase D activity	0.00305973	2
GO:0005506	MF	iron ion binding	0.00356185	9
GO:0004857	MF	enzyme inhibitor activity	0.00432066	5
GO:0071949	MF	FAD binding	0.00506477	2
GO:0030976	MF	thiamine pyrophosphate binding	0.00506477	2
GO:0016491	MF	oxidoreductase activity	0.00522483	22
GO:0046983	MF	protein dimerization activity	0.0055817	8
GO:0005509	MF	calcium ion binding	0.00985587	7
GO:0046872	MF	metal ion binding	0.0100072	34
GO:0043169	MF	cation binding	0.0101549	34
GO:0050660	MF	flavin adenine dinucleotide binding	0.0133832	4
GO:0050662	MF	coenzyme binding	0.0153273	8
GO:0003955	MF	NAD(P)H dehydrogenase (quinone) activity	0.0177658	1
GO:0019842	MF	vitamin binding	0.0189667	4
GO:0005515	MF	protein binding	0.0196113	16
GO:0098772	MF	molecular function regulator	0.0226053	6
GO:1901681	MF	sulfur compound binding	0.0226118	2
GO:0015369	MF	calcium:proton antiporter activity	0.0294351	1
GO:0005345	MF	purine nucleobase transmembrane transporter activity	0.0294351	1
GO:0008081	MF	phosphoric diester hydrolase activity	0.0345315	2
GO:0000386	MF	second spliceosomal transesterification activity	0.0409668	1
GO:0015205	MF	nucleobase transmembrane transporter activity	0.0409668	1
GO:0015368	MF	calcium:cation antiporter activity	0.0409668	1
GO:0015297	MF	antiporter activity	0.0428496	3
GO:0004620	MF	phospholipase activity	0.0454499	2
GO:0016831	MF	carboxy-lyase activity	0.047024	3
GO:0004871	MF	obsolete signal transducer activity	0.0483539	2
GO:0042910	MF	xenobiotic transmembrane transporter activity	0.0483539	2
GO:0030234	MF	enzyme regulator activity	0.0488978	5
