# Supplementary material for: Identification and Analysis of Genes Involved in Double Fertilization in Rice
Source: Int J Mol Sci. 2021 Nov 27;22(23):12850. doi: 10.3390/ijms222312850 (PMC8657449; doi:10.3390/ijms222312850)
Supplement: Supplementary file 1 [file ijms-22-12850-s001.zip › Table S10. GO enrichment analysis of the 116 PTRGs expressed in anther but not in pistil..xls]

## Sheet: Sheet1
Table S10. GO enrichment analysis of the 116 PTRGs expressed in anther but not in pistil.
GO ID	Term Type	Description	p-adjust	Gene Number	Type
GO:0005976	BP	polysaccharide metabolic process	0.000224621	11	Carbohydrate
GO:0005975	BP	carbohydrate metabolic process	0.00290806	16
GO:0000271	BP	polysaccharide biosynthetic process	0.027077	6
GO:0051274	BP	beta-glucan biosynthetic process	0.027077	4
GO:0045490	BP	pectin catabolic process	0.027077	4	Pectin
GO:0016740	MF	transferase activity	0.027077	32	Transferase
GO:0035251	MF	UDP-glucosyltransferase activity	0.0424514	7
