# Supplementary material for: Identification and Analysis of Genes Involved in Double Fertilization in Rice
Source: Int J Mol Sci. 2021 Nov 27;22(23):12850. doi: 10.3390/ijms222312850 (PMC8657449; doi:10.3390/ijms222312850)
Supplement: Supplementary file 1 [file ijms-22-12850-s001.zip › Table S11. KEGG enrichment analysis of the 116 PTRGs expressed in anther but not in pistil..xls]

## Sheet: Sheet1
Table S11. KEGG enrichment analysis of the 116 PTRGs expressed in anther but not in pistil.
Pathway ID	Description	First Category	Second Category	p-adjust	Gene number
map00040	Pentose and glucuronate interconversions	Metabolism	Carbohydrate metabolism	0.0139353	3
map00564	Glycerophospholipid metabolism	Metabolism	Lipid metabolism	0.0218368	3
