# Supplementary material for: Identification and Analysis of Genes Involved in Double Fertilization in Rice
Source: Int J Mol Sci. 2021 Nov 27;22(23):12850. doi: 10.3390/ijms222312850 (PMC8657449; doi:10.3390/ijms222312850)
Supplement: Supplementary file 1 [file ijms-22-12850-s001.zip › Table S13. GO enrichment analysis of the 69 pollen tube-activated genes..xls]

## Sheet: Sheet1
Table S13. GO enrichment analysis of the 69 pollen tube-activated genes.
GO ID	Term Type	Description	p-adjust	Gene Number	Type
GO:0009767	BP	photosynthetic electron transport chain	0.0166293	3	Photosynthesis
GO:0015979	BP	photosynthesis	0.0167174	4
GO:0015986	BP	ATP synthesis coupled proton transport	0.019961	3	ATP synthesis
GO:0015985	BP	energy coupled proton transport, down electrochemical gradient	0.019961	3
GO:0006754	BP	ATP biosynthetic process	0.0375916	3
GO:0009145	BP	purine nucleoside triphosphate biosynthetic process	0.0417636	3
GO:0009206	BP	purine ribonucleoside triphosphate biosynthetic process	0.0417636	3
GO:0009205	BP	purine ribonucleoside triphosphate metabolic process	0.0417636	3
GO:0009144	BP	purine nucleoside triphosphate metabolic process	0.0419578	3
GO:0009535	CC	chloroplast thylakoid membrane	1.19039e-08	10	Chloroplast
GO:0055035	CC	plastid thylakoid membrane	1.19039e-08	10
GO:0042651	CC	thylakoid membrane	1.19039e-08	10
GO:0034357	CC	photosynthetic membrane	1.19039e-08	10
GO:0044436	CC	thylakoid part	2.67638e-08	10
GO:0044434	CC	chloroplast part	5.88338e-05	10
GO:0009507	CC	chloroplast	0.000116365	10
GO:0009536	CC	plastid	2.67638e-08	23
GO:0044435	CC	plastid part	5.89716e-05	10
GO:0044444	CC	cytoplasmic part	0.00271497	26
GO:0098796	CC	membrane protein complex	0.00425828	7
GO:0043231	CC	intracellular membrane-bounded organelle	0.00657666	26
GO:0043227	CC	membrane-bounded organelle	0.00657666	26
GO:0043229	CC	intracellular organelle	0.0167174	26
GO:0043226	CC	organelle	0.0167174	26
GO:0016984	MF	ribulose-bisphosphate carboxylase activity	0.0375247	2
