# Supplementary material for: Identification and Analysis of Genes Involved in Double Fertilization in Rice
Source: Int J Mol Sci. 2021 Nov 27;22(23):12850. doi: 10.3390/ijms222312850 (PMC8657449; doi:10.3390/ijms222312850)
Supplement: Supplementary file 1 [file ijms-22-12850-s001.zip › Table S14. KEGG enrichment analysis of the 69 pollen tube-activated genes..xls]

## Sheet: Sheet1
Table S14. KEGG enrichment analysis of the 69 pollen tube-activated genes.
Pathway ID	Description	First Category	Second Category	p-adjust	Gene number
map00195	Photosynthesis	Metabolism	Energy metabolism	1.32777e-06	6
map00190	Oxidative phosphorylation	Metabolism	Energy metabolism	0.000156323	5
