# Supplementary material for: Identification and Analysis of Genes Involved in Double Fertilization in Rice
Source: Int J Mol Sci. 2021 Nov 27;22(23):12850. doi: 10.3390/ijms222312850 (PMC8657449; doi:10.3390/ijms222312850)
Supplement: Supplementary file 1 [file ijms-22-12850-s001.zip › Table S15. 23 pollen tube-related AGP genes..xlsx]

## Sheet: Sheet1
Table S15. 23 pollen tube-related AGP genes
Gene ID	Gene product
LOC_Os01g46850	expressed protein
LOC_Os01g57030	expressed protein
LOC_Os01g57040	expressed protein
LOC_Os02g26320	fasciclin-like arabinogalactan precursor protein, putative, expressed
LOC_Os03g10680	formin-like protein 6 precursor, putative, expressed
LOC_Os03g58940	LTPL83 - Protease inhibitor/seed storage/LTP family protein precursor, putative, expressed
LOC_Os03g63540	lysine-rich arabinogalactan protein 19 precursor, putative, expressed
LOC_Os04g01070	transposon protein, putative, CACTA, En/Spm sub-class, expressed
LOC_Os05g51900	expressed protein
LOC_Os06g17450	expressed protein
LOC_Os06g21410	arabinogalactan peptide 23 precursor, putative, expressed
LOC_Os06g45240	inactive receptor kinase At2g26730 precursor, putative, expressed
LOC_Os06g49770	LTPL86 - Protease inhibitor/seed storage/LTP family protein precursor, expressed
LOC_Os07g13580	glucan endo-1,3-beta-glucosidase precursor, putative, expressed
LOC_Os07g18070	expressed protein
LOC_Os07g38290	plastocyanin-like domain containing protein, putative, expressed
LOC_Os08g38250	skin secretory protein xP2 precursor, putative, expressed
LOC_Os08g40990	receptor-like protein kinase 1, putative, expressed
LOC_Os09g07350	fasciclin-like arabinogalactan protein 8 precursor, putative, expressed
LOC_Os09g29990	skin secretory protein xP2 precursor, putative, expressed
LOC_Os11g43640	retrotransposon protein, putative, unclassified, expressed
LOC_Os12g35710	uncharacterized protein At4g06744 precursor, putative, expressed
LOC_Os12g43700	SCP-like extracellular protein, expressed
