# Supplementary material for: Identification and Analysis of Genes Involved in Double Fertilization in Rice
Source: Int J Mol Sci. 2021 Nov 27;22(23):12850. doi: 10.3390/ijms222312850 (PMC8657449; doi:10.3390/ijms222312850)
Supplement: Supplementary file 1 [file ijms-22-12850-s001.zip › Table S16. The distributions of the pollen tube-related AGP, CRP and RLK genes in pistil and anther..xlsx]

## Sheet: Sheet1
Table S16. The distributions of the pollen tube-related AGP, CRP and RLK genes in pistil and anther.
Genes	Tissues	Gene ID	The average FPKM values of genes in each sample						The expression values from RGAP
			N1	N2	N3	M1	M2	M3	Leaves-20 days	Shoots	Seedling at four-leaf stage	Pre-emergence inflorescence	Post-emergence inflorescence	Anther	Pistil	Seed-5 DAP	Seed-10 DAP	Embryo-25 DAP	Endosperm-25 DAP
AGPs	Pistil	LOC_Os03g10680	8.79667	3.49	3.27	8.77	7.36333	4.09	0.425492	2.84734	2.48572	4.55174	4.15122	0.125524	3.64531	4.96494	1.61109	1.61801	0.730236
		LOC_Os06g49770	126.587	57.1367	37.6233	161.29	88.1767	31.1867	0	13.4125	11.433	301.86	5.57919	0	39.38	56.4811	0	1.67661	0
	Anther	LOC_Os01g46850	8.76333	1.46667	0.243333	13.2067	3.15333	1.54667	0	0	0	0	12.894	365.722	0	0	0	0	0
		LOC_Os02g26320	11.0733	0.73	0.536667	21.9367	3.01333	2.07667	0	0	0	0	0.714443	204.789	0	0	0	0	0
		LOC_Os04g01070	0.62	0.09	0.0766667	1.25667	0.39	0.21	0	0	0.170785	0.132217	2.23124	50.814	0	0	0	0	0
		LOC_Os06g45240	6.94667	1.08333	0.5	13.27	3.28	2.07333	0	0	0.27306	0	1.75956	157.4	0.459472	1.15531	0	0	0
		LOC_Os07g18070	8.95667	1.23333	0.49	18.88	4.24333	2.14667	1.39814	0	0	0	1.74739	226.886	0	0	0	0	0
		LOC_Os08g40990	10.0567	1.58333	0.77	18.5433	4.49333	2.7	0.419467	0	0.409994	0	0.632707	142.89	0	0	0	0	0
		LOC_Os09g29990	6.54667	0.81	0.173333	10.42	2.47667	1.12	0	0	0.128197	0	0	117.316	0	0	0	0	0
CRPs	Pistil	LOC_Os01g03310	26.45	0.09	0.153333	36.58	0.8	0.506667	459.95	70.3688	29.1241	0	14.5406	0	3.21175	1.1666	0	0	0
		LOC_Os01g03320	6.10667	0.78	0	6.81	1.61	0.0933333	233.51	22.4962	7.36639	0	1.48214	0	1.15174	0	0	2.5194	0
		LOC_Os01g03680	216.147	3.09667	0.803333	173.093	12.6633	1.39	11.1236	72.7404	0	4.4809	0	0	6.83484	4.57304	6.50857	318.969	2.29669
		LOC_Os02g41910	3.05333	0.793333	0.646667	2.63	2.11667	0.646667	0	0	0	1.89743	0.561046	0	5.31978	0	0	0	0
		LOC_Os03g18530	7.51333	1.25	2.11	3.82333	33.9733	0.556667	0	0	0.506905	1.13309	0	0	3.50726	15.2274	0	5.52268	1.46921
		LOC_Os03g52300	54.02	26.3367	22.82	71.3633	37.4	34.23	0	0	0.307358	13.1879	4.16597	0.486658	26.8107	9.83916	2.31047	11.7259	1.12013
		LOC_Os06g49770	126.587	57.1367	37.6233	161.29	88.1767	31.1867	0	13.4125	11.433	301.86	5.57919	0	39.38	56.4811	0	1.67661	0
	Anther	LOC_Os10g11750	6.98333	1.17	1.07	15.0967	3.55667	2.00333	0	0	0	0	0	128.558	0	0	0	0	0
RLKs	Pistil	LOC_Os01g14510	8.59333	0.2	0.47	6.95667	0.726667	0.796667	5.13347	18.0199	0.677339	2.757	3.24144	0	2.94428	2.30221	0	2.85812	0
		LOC_Os03g05140	0.28	0	0	0.313333	0	0	0	0	0.12579	0.91161	0	0	0.600033	0	0	0	0
		LOC_Os03g57780	25.1867	7.45667	8.26	24.6433	12.3033	8.32333	0.375709	19.1548	9.10168	38.6647	5.98734	0.385529	25.181	12.0342	0.922306	19.4257	0.565686
		LOC_Os08g40270	7.61667	2.31	3.17667	7.43333	2.62667	3.48	0.232446	1.46816	0.261859	0.928095	0.341395	0	3.00077	0.614851	0	0.485648	0
		LOC_Os10g37190	23.0733	6.08333	8.61667	19.5133	10.0233	15.2933	3.36055	25.5163	17.2814	21.0099	29.3086	0.4508	34.3388	4.61013	5.32234	1.79804	8.78718
	Anther	LOC_Os01g55440	38.33	6.37	1.98667	71.9433	17.3967	8.99667	0	0	0.1509	0	4.4251	347.778	0.425335	0	0	0	0
		LOC_Os01g66860	21.06	5.57667	2.75	40.3167	10.7633	7.34667	0.8584	26.9433	3.41702	0	3.26888	198.356	0.422487	0.540797	0	0.576109	0
		LOC_Os02g35300	24.4933	3.7	1.56	45.2067	10.5367	5.82	0.0308988	0	0.547404	0.322522	2.26668	270.497	0.408095	0.367479	0.27517	0.451883	0
		LOC_Os02g54590	4.99	0.783333	0.57	10.1833	1.82667	0.996667	0.0547695	1.37477	0.250845	0.439793	0.516972	94.1342	0.302351	0.234128	0	0.226391	0
		LOC_Os03g53410	2.55667	0.49	0.166667	4.78	0.89	0.656667	0	0	0.13932	0	5.94841	99.8161	0.38387	10.5075	4.79366	0.484877	3.05796
		LOC_Os05g14750	1.89	0.393333	0.17	4.2	1.38667	0.793333	0	0	0.183251	0.342028	2.08208	117.25	0.319646	0.223402	0	0.510749	0
		LOC_Os05g20150	31.1233	6.07	2.52667	63.79	13.52	7.89667	0.062726	0	0.127573	0	2.88726	444.11	0.420714	0	0	0	0
		LOC_Os06g09860	2.30667	0.293333	0.0533333	4.94333	1.25333	0.633333	0	0	0.48038	0	0.415466	155.135	0.29898	0	0	0	0
		LOC_Os06g29080	3.40667	0.58	0.296667	6.38	1.43333	0.813333	0.00882165	0	0.122079	0	0	26.2058	0	0	0	0	0
		LOC_Os06g45240	6.94667	1.08333	0.5	13.27	3.28	2.07333	0	0	0.27306	0	1.75956	157.4	0.459472	1.15531	0	0	0
		LOC_Os07g08000	5.79333	0.766667	1.81333	9.76	2.73333	1.30667	0.158061	8.13405	1.18866	6.37153	3.57904	17.9468	0	0	0	0.277054	0
		LOC_Os08g40990	10.0567	1.58333	0.77	18.5433	4.49333	2.7	0.419467	0	0.409994	0	0.632707	142.89	0	0	0	0	0
		LOC_Os11g13860	13.1833	3.93667	2.19333	27.1933	5.78	3.76333	1.00729	0	0.684275	0.673741	2.01863	137.195	0.443044	0.280172	0	0.277765	0
		LOC_Os11g42440	4.7	0.356667	0.496667	8.78667	2.14	0.88	0	0	0.192861	0.528631	0	24.9264	0	0	0	0	0
		LOC_Os12g12860	73.4033	13.56	5.33667	153.877	34.7033	16.7133	0	0	0.24152	0.127904	6.13683	558.179	0.493846	0	0	0.429362	0
