# Supplementary material for: Identification and Analysis of Genes Involved in Double Fertilization in Rice
Source: Int J Mol Sci. 2021 Nov 27;22(23):12850. doi: 10.3390/ijms222312850 (PMC8657449; doi:10.3390/ijms222312850)
Supplement: Supplementary file 1 [file ijms-22-12850-s001.zip › Table S17. The 773 CRP genes in rice..xlsx]

## Sheet: Sheet1
Table S17. The 773 CRP genes in rice.
Gene ID	Gene product	Expression type
LOC_Os01g03310	BBTI1 - Bowman-Birk type bran trypsin inhibitor precursor, expressed	PTRGs
LOC_Os01g03320	BBTI2 - Bowman-Birk type bran trypsin inhibitor precursor, expressed
LOC_Os01g03330	BBTI3 - Bowman-Birk type bran trypsin inhibitor precursor, expressed
LOC_Os01g03340	BBTI4 - Bowman-Birk type bran trypsin inhibitor precursor, expressed
LOC_Os01g03360	BBTI5 - Bowman-Birk type bran trypsin inhibitor precursor, expressed
LOC_Os01g03680	BBTI8 - Bowman-Birk type bran trypsin inhibitor precursor, expressed
LOC_Os01g10470	RALFL17 - Rapid ALkalinization Factor RALF family protein precursor, expressed
LOC_Os01g42160	MEGL14 - Maternally expressed gene MEG family protein precursor, putative, expressed
LOC_Os02g03520	THION25 - Plant thionin family protein precursor, expressed
LOC_Os02g41910	OsFBO12 - F-box and other domain containing protein, expressed
LOC_Os03g14030	thaumatin, putative, expressed
LOC_Os03g18530	ECAGL1 - ECA1 gametogenesis related family protein precursor, expressed
LOC_Os03g21880	THION28 - Plant thionin family protein precursor, expressed
LOC_Os03g41060	GASR2 - Gibberellin-regulated GASA/GAST/Snakin family protein precursor, putative, expressed
LOC_Os03g50960	LTPL118 - Protease inhibitor/seed storage/LTP family protein precursor, expressed
LOC_Os03g52300	SCP-like extracellular protein, expressed
LOC_Os03g58940	LTPL83 - Protease inhibitor/seed storage/LTP family protein precursor, putative, expressed
LOC_Os03g61780	glucan endo-1,3-beta-glucosidase-related, putative, expressed
LOC_Os03g64310	expressed protein
LOC_Os04g32680	POEI20 - Pollen Ole e I allergen and extensin family protein precursor, expressed
LOC_Os05g11330	RALFL19 - Rapid ALkalinization Factor RALF family protein precursor, expressed
LOC_Os05g47700	LTPL152 - Protease inhibitor/seed storage/LTP family protein precursor, expressed
LOC_Os06g19990	GPI-anchored protein, putative, expressed
LOC_Os06g36240	POEI21 - Pollen Ole e I allergen and extensin family protein precursor, expressed
LOC_Os06g49770	LTPL86 - Protease inhibitor/seed storage/LTP family protein precursor, expressed
LOC_Os08g02880	CXXXC11 - Cysteine-rich protein with paired CXXXC motifs precursor, expressed
LOC_Os09g24190	expressed protein
LOC_Os09g39950	POEI23 - Pollen Ole e I allergen and extensin family protein precursor, expressed
LOC_Os10g11750	LTPL89 - Protease inhibitor/seed storage/LTP family protein precursor, expressed
LOC_Os10g36550	CRP3 - Cysteine-rich family protein precursor, expressed
LOC_Os12g23190	tyrosine phosphatase family protein, putative, expressed
LOC_Os12g35690	RALFL5 - Rapid ALkalinization Factor RALF family protein precursor, expressed
LOC_Os12g43820	GCRP5 - Glycine and cysteine rich family protein precursor, expressed
LOC_Os01g01312	retrotransposon protein, putative, Ty1-copia subclass, expressed
LOC_Os01g02310	expressed protein
LOC_Os01g02450	retrotransposon protein, putative, unclassified, expressed
LOC_Os01g03380	BBTI6 - Bowman-Birk type bran trypsin inhibitor precursor, putative, expressed
LOC_Os01g03390	BBTI7 - Bowman-Birk type bran trypsin inhibitor precursor, expressed
LOC_Os01g04040	BBTI11 - Bowman-Birk type bran trypsin inhibitor precursor, putative, expressed
LOC_Os01g04050	BBTI12 - Bowman-Birk type bran trypsin inhibitor precursor, expressed
LOC_Os01g04500	expressed protein
LOC_Os01g05289	expressed protein
LOC_Os01g06090	expressed protein
LOC_Os01g06540	PHD finger protein, putative, expressed
LOC_Os01g06940	POEI33 - Pollen Ole e I allergen and extensin family protein precursor, expressed
LOC_Os01g06960	POEI34 - Pollen Ole e I allergen and extensin family protein precursor, putative, expressed
LOC_Os01g06980	POEI35 - Pollen Ole e I allergen and extensin family protein precursor, putative, expressed
LOC_Os01g06990	POEI36 - Pollen Ole e I allergen and extensin family protein precursor, putative, expressed
LOC_Os01g07000	POEI37 - Pollen Ole e I allergen and extensin family protein precursor, putative, expressed
LOC_Os01g07010	POEI38 - Pollen Ole e I allergen and extensin family protein precursor, putative, expressed
LOC_Os01g07020	POEI39 - Pollen Ole e I allergen and extensin family protein precursor, putative, expressed
LOC_Os01g07030	POEI40 - Pollen Ole e I allergen and extensin family protein precursor, expressed
LOC_Os01g07040	POEI41 - Pollen Ole e I allergen and extensin family protein precursor, expressed
LOC_Os01g07050	POEI42 - Pollen Ole e I allergen and extensin family protein precursor, expressed
LOC_Os01g07060	POEI43 - Pollen Ole e I allergen and extensin family protein precursor, putative, expressed
LOC_Os01g09510	60S acidic ribosomal protein, putative, expressed
LOC_Os01g10550	DEFL35 - Defensin and Defensin-like DEFL family, expressed
LOC_Os01g12020	LTPL18 - Protease inhibitor/seed storage/LTP family protein precursor, expressed
LOC_Os01g12150	expressed protein
LOC_Os01g14540	STIGL1 - Stigma-specific Stig1 family protein precursor, expressed
LOC_Os01g14660	expansin precursor, putative, expressed
LOC_Os01g14990	GCRP6 - Glycine and cysteine rich family protein precursor, putative, expressed
LOC_Os01g15320	RALFL9 - Rapid ALkalinization Factor RALF family protein precursor, expressed
LOC_Os01g18400	CHIT10 - Chitinase family protein precursor, expressed
LOC_Os01g24590	LTPL46 - Protease inhibitor/seed storage/LTP family protein precursor, expressed
LOC_Os01g25540	RALFL6 - Rapid ALkalinization Factor RALF family protein precursor, expressed
LOC_Os01g25560	RALFL7 - Rapid ALkalinization Factor RALF family protein precursor, expressed
LOC_Os01g28160	expressed protein
LOC_Os01g28530	retrotransposon protein, putative, Ty3-gypsy subclass
LOC_Os01g33550	MEGL19 - Maternally expressed gene MEG family protein precursor, putative, expressed
LOC_Os01g33650	expressed protein
LOC_Os01g34740	transposon protein, putative, unclassified, expressed
LOC_Os01g40220	DEFL7 - Defensin and Defensin-like DEFL family
LOC_Os01g41140	THION18 - Plant thionin family protein precursor, expressed
LOC_Os01g41170	THION27 - Plant thionin family protein precursor, expressed
LOC_Os01g41180	THION19 - Plant thionin family protein precursor, putative, expressed
LOC_Os01g42150	MEGL13 - Maternally expressed gene MEG family protein precursor, expressed
LOC_Os01g42210	LTPL47 - Protease inhibitor/seed storage/LTP family protein precursor, putative, expressed
LOC_Os01g44010	retrotransposon protein, putative, unclassified, expressed
LOC_Os01g49410	expressed protein
LOC_Os01g49640	LTPL149 - Protease inhibitor/seed storage/LTP family protein precursor, expressed
LOC_Os01g49650	LTPL150 - Protease inhibitor/seed storage/LTP family protein precursor, expressed
LOC_Os01g51270	THION44 - Plant thionin family protein precursor, putative, expressed
LOC_Os01g52650	POEI44 - Pollen Ole e I allergen and extensin family protein precursor, expressed
LOC_Os01g52660	POEI51 - Pollen Ole e I allergen and extensin family protein precursor, expressed
LOC_Os01g53230	expressed protein
LOC_Os01g53750	glucan endo-1,3-beta-glucosidase precursor, putative, expressed
LOC_Os01g57520	expressed protein
LOC_Os01g58230	expressed protein
LOC_Os01g58650	LTPL35 - Protease inhibitor/seed storage/LTP family protein precursor, putative
LOC_Os01g58660	LTPL29 - Protease inhibitor/seed storage/LTP family protein precursor, expressed
LOC_Os01g59610	KAZ1 - Kazal-type serine protease inhibitor precursor, expressed
LOC_Os01g59870	LTPL65 - Protease inhibitor/seed storage/LTP family protein precursor, expressed
LOC_Os01g60740	LTPL16 - Protease inhibitor/seed storage/LTP family protein precursor, expressed
LOC_Os01g60900	expressed protein
LOC_Os01g61360	DEFL4 - Defensin and Defensin-like DEFL family, expressed
LOC_Os01g62980	LTPL101 - Protease inhibitor/seed storage/LTP family protein precursor, expressed
LOC_Os01g67390	POEI32 - Pollen Ole e I allergen and extensin family protein precursor, expressed
LOC_Os01g68580	LTPL38 - Protease inhibitor/seed storage/LTP family protein precursor, expressed
LOC_Os01g68589	LTPL39 - Protease inhibitor/seed storage/LTP family protein precursor, expressed
LOC_Os01g68598	expressed protein
LOC_Os01g68840	CRP6 - Cysteine-rich family protein precursor, expressed
LOC_Os01g70440	LEML1 - Anther-specific LEM1 family protein precursor, expressed
LOC_Os01g70680	DEF1 - Defensin and Defensin-like DEFL family, expressed
LOC_Os01g70690	RALFL1 - Rapid ALkalinization Factor RALF family protein precursor, putative, expressed
LOC_Os01g73700	RCLEA2 - Root cap and Late embryogenesis related family protein precursor, putative, expressed
LOC_Os01g73710	RCLEA3 - Root cap and Late embryogenesis related family protein precursor, putative, expressed
LOC_Os01g73720	RCLEA4 - Root cap and Late embryogenesis related family protein precursor, expressed
LOC_Os01g73730	RCLEA5 - Root cap and Late embryogenesis related family protein precursor, expressed
LOC_Os02g01190	POEI25 - Pollen Ole e I allergen and extensin family protein precursor, expressed
LOC_Os02g01910	expressed protein
LOC_Os02g02200	thaumatin, putative, expressed
LOC_Os02g02630	THION20 - Plant thionin family protein precursor, putative, expressed
LOC_Os02g02650	THION21 - Plant thionin family protein precursor, putative
LOC_Os02g03480	THION24 - Plant thionin family protein precursor, expressed
LOC_Os02g03800	THION22 - Plant thionin family protein precursor, expressed
LOC_Os02g04190	THION23 - Plant thionin family protein precursor, expressed
LOC_Os02g06220	receptor protein kinase-like protein At4g34220 precursor, putative, expressed
LOC_Os02g07440	DEFL78 - Defensin and Defensin-like DEFL family, expressed
LOC_Os02g07495	expressed protein
LOC_Os02g07550	DEFL1 - Defensin and Defensin-like DEFL family, expressed
LOC_Os02g07580	expressed protein
LOC_Os02g07600	DEF3 - Defensin and Defensin-like DEFL family, expressed
LOC_Os02g07624	gamma-thionin family domain containing protein, expressed
LOC_Os02g07628	gamma-thionin family domain containing protein, expressed
LOC_Os02g08014	expressed protein
LOC_Os02g12060	DEF6 - Defensin and Defensin-like DEFL family, expressed
LOC_Os02g13450	MEGL7 - Maternally expressed gene MEG family protein precursor, putative, expressed
LOC_Os02g13555	expressed protein
LOC_Os02g16780	expansin precursor, putative, expressed
LOC_Os02g16809	expansin precursor, putative, expressed
LOC_Os02g16839	expansin precursor, putative, expressed
LOC_Os02g16850	expansin precursor, putative, expressed
LOC_Os02g18490	LTPL53 - Protease inhibitor/seed storage/LTP family protein precursor, expressed
LOC_Os02g19020	expressed protein
LOC_Os02g20130	DEFL72 - Defensin and Defensin-like DEFL family
LOC_Os02g21280	POEI30 - Pollen Ole e I allergen and extensin family protein precursor, expressed
LOC_Os02g24720	LTPL21 - Protease inhibitor/seed storage/LTP family protein precursor, expressed
LOC_Os02g27300	SCP-like extracellular protein, expressed
LOC_Os02g27310	TKL_IRAK_DUF26-lc.6 - DUF26 kinases have homology to DUF26 containing loci, expressed
LOC_Os02g29980	X8 domain containing protein, expressed
LOC_Os02g32080	LEML2 - Anther-specific LEM1 family protein precursor, expressed
LOC_Os02g33170	POEI29 - Pollen Ole e I allergen and extensin family protein precursor, putative, expressed
LOC_Os02g33270	retrotransposon protein, putative, unclassified, expressed
LOC_Os02g37400	retrotransposon protein, putative, Ty1-copia subclass, expressed
LOC_Os02g37550	expressed protein
LOC_Os02g37940	CRP12 - Cysteine-rich family protein precursor, expressed
LOC_Os02g39330	CHIT1 - Chitinase family protein precursor, expressed
LOC_Os02g39625	hypothetical protein
LOC_Os02g41490	expressed protein
LOC_Os02g42450	RIPER1 - Ripening-related family protein precursor, expressed
LOC_Os02g42650	expansin precursor, putative, expressed
LOC_Os02g44310	LTPL112 - Protease inhibitor/seed storage/LTP family protein precursor, expressed
LOC_Os02g44320	LTPL113 - Protease inhibitor/seed storage/LTP family protein precursor, expressed
LOC_Os02g44800	hypothetical protein
LOC_Os02g44940	RALFL8 - Rapid ALkalinization Factor RALF family protein precursor, expressed
LOC_Os02g46020	transposon protein, putative, unclassified, expressed
LOC_Os02g46980	pentatricopeptide, putative, expressed
LOC_Os02g49280	LTPL50 - Protease inhibitor/seed storage/LTP family protein precursor, putative, expressed
LOC_Os02g49540	DEFL73 - Defensin and Defensin-like DEFL family, expressed
LOC_Os02g53200	glucan endo-1,3-beta-glucosidase precursor, putative, expressed
LOC_Os02g53570	DEFL74 - Defensin and Defensin-like DEFL family, expressed
LOC_Os02g53590	DEFL71 - Defensin and Defensin-like DEFL family, expressed
LOC_Os02g53600	DEFL75 - Defensin and Defensin-like DEFL family, expressed
LOC_Os02g54530	SCP-like extracellular protein, expressed
LOC_Os02g55500	expressed protein
LOC_Os02g55510	CXXXC2 - Cysteine-rich protein with paired CXXXC motifs precursor, putative, expressed
LOC_Os02g55649	CXXXC8 - Cysteine-rich protein with paired CXXXC motifs precursor, putative, expressed
LOC_Os02g55658	expressed protein
LOC_Os02g55698	expressed protein
LOC_Os02g55810	CXXXC9 - Cysteine-rich protein with paired CXXXC motifs precursor, expressed
LOC_Os02g56870	DEFL38 - Defensin and Defensin-like DEFL family, expressed
LOC_Os02g56890	CXXXC10 - Cysteine-rich protein with paired CXXXC motifs precursor, putative, expressed
LOC_Os03g01270	expansin precursor, putative, expressed
LOC_Os03g01300	LTPL114 - Protease inhibitor/seed storage/LTP family protein precursor, expressed
LOC_Os03g01320	LTPL116 - Protease inhibitor/seed storage/LTP family protein precursor, expressed
LOC_Os03g01500	hypothetical protein
LOC_Os03g02050	LTPL151 - Protease inhibitor/seed storage/LTP family protein precursor, expressed
LOC_Os03g02255	expressed protein
LOC_Os03g03810	DEF8 - Defensin and Defensin-like DEFL family, expressed
LOC_Os03g04020	expansin precursor, putative, expressed
LOC_Os03g04060	CHIT16 - Chitinase family protein precursor, expressed
LOC_Os03g06010	expansin precursor, putative, expressed
LOC_Os03g06020	expansin precursor, putative, expressed
LOC_Os03g06580	MTN26L2 - MtN26 family protein precursor, expressed
LOC_Os03g06600	expressed protein
LOC_Os03g07100	LTPL82 - Protease inhibitor/seed storage/LTP family protein precursor, expressed
LOC_Os03g07220	PPR repeat domain containing protein, putative, expressed
LOC_Os03g08710	THION26 - Plant thionin family protein precursor, expressed
LOC_Os03g09230	LTPL69 - Protease inhibitor/seed storage/LTP family protein precursor, expressed
LOC_Os03g10550	expressed protein
LOC_Os03g11140	pleckstrin homology domain-containing protein-related taxo, putative, expressed
LOC_Os03g12140	glucan endo-1,3-beta-glucosidase precursor, putative, expressed
LOC_Os03g12238	expressed protein
LOC_Os03g13070	thaumatin family domain containing protein, expressed
LOC_Os03g13370	tetratricopeptide repeat domain containing protein, expressed
LOC_Os03g14050	thaumatin-like protein 1 precursor, putative, expressed
LOC_Os03g14130	POEI1 - Pollen Ole e I allergen and extensin family protein precursor, expressed
LOC_Os03g14140	POEI16 - Pollen Ole e I allergen and extensin family protein precursor, expressed
LOC_Os03g14300	THION29 - Plant thionin family protein precursor, expressed
LOC_Os03g14550	GASR1 - Gibberellin-regulated GASA/GAST/Snakin family protein precursor, putative
LOC_Os03g14615	LTPL117 - Protease inhibitor/seed storage/LTP family protein precursor, expressed
LOC_Os03g14630	LTPL106 - Protease inhibitor/seed storage/LTP family protein precursor, expressed
LOC_Os03g14642	LTPL107 - Protease inhibitor/seed storage/LTP family protein precursor, expressed
LOC_Os03g19170	GCRP7 - Glycine and cysteine rich family protein precursor, expressed
LOC_Os03g19180	GCRP8 - Glycine and cysteine rich family protein precursor, putative, expressed
LOC_Os03g20760	LTPL66 - Protease inhibitor/seed storage/LTP family protein precursor, expressed
LOC_Os03g22210	POEI46 - Pollen Ole e I allergen and extensin family protein precursor, expressed
LOC_Os03g22230	POEI47 - Pollen Ole e I allergen and extensin family protein precursor, expressed
LOC_Os03g22250	POEI48 - Pollen Ole e I allergen and extensin family protein precursor, putative, expressed
LOC_Os03g22440	RALFL15 - Rapid ALkalinization Factor RALF family protein precursor, putative, expressed
LOC_Os03g24130	CXXC1 - Cysteine-rich protein with CXXC and CXXXC motifs precursor, putative, expressed
LOC_Os03g24300	LTPL1 - Protease inhibitor/seed storage/LTP family protein precursor, expressed
LOC_Os03g24740	expressed protein
LOC_Os03g25350	LTPL36 - Protease inhibitor/seed storage/LTP family protein precursor, expressed
LOC_Os03g26800	LTPL51 - Protease inhibitor/seed storage/LTP family protein precursor, expressed
LOC_Os03g26820	LTPL52 - Protease inhibitor/seed storage/LTP family protein precursor, expressed
LOC_Os03g27980	glucan endo-1,3-beta-glucosidase precursor, putative, expressed
LOC_Os03g30470	CHIT4 - Chitinase family protein precursor, expressed
LOC_Os03g38359	expressed protein
LOC_Os03g43050	LTPL90 - Protease inhibitor/seed storage/LTP family protein precursor, putative, expressed
LOC_Os03g44000	LTPL15 - Protease inhibitor/seed storage/LTP family protein precursor, expressed
LOC_Os03g44290	expansin precursor, putative, expressed
LOC_Os03g44950	LTPL91 - Protease inhibitor/seed storage/LTP family protein precursor, expressed
LOC_Os03g45150	LTPL93 - Protease inhibitor/seed storage/LTP family protein precursor, expressed
LOC_Os03g45960	thaumatin, putative, expressed
LOC_Os03g46070	thaumatin, putative, expressed
LOC_Os03g46110	LTPL94 - Protease inhibitor/seed storage/LTP family protein precursor, expressed
LOC_Os03g46150	LTPL72 - Protease inhibitor/seed storage/LTP family protein precursor, expressed
LOC_Os03g46180	LTPL71 - Protease inhibitor/seed storage/LTP family protein precursor, expressed
LOC_Os03g46660	glucan endo-1,3-beta-glucosidase precursor, putative, expressed
LOC_Os03g46930	expressed protein
LOC_Os03g47270	GCRP4 - Glycine and cysteine rich family protein precursor, expressed
LOC_Os03g49270	THION36 - Plant thionin family protein precursor, expressed
LOC_Os03g49280	THION37 - Plant thionin family protein precursor, putative, expressed
LOC_Os03g49300	THION38 - Plant thionin family protein precursor, putative, expressed
LOC_Os03g49310	THION39 - Plant thionin family protein precursor, expressed
LOC_Os03g51660	expressed protein
LOC_Os03g52355	hypothetical protein
LOC_Os03g52360	PIII3 - Proteinase inhibitor II family protein precursor, putative, expressed
LOC_Os03g52370	PIII4 - Proteinase inhibitor II family protein precursor, expressed
LOC_Os03g52380	PIII5 - Proteinase inhibitor II family protein precursor, expressed
LOC_Os03g52390	PIII1 - Proteinase inhibitor II family protein precursor, expressed
LOC_Os03g55290	GASR3 - Gibberellin-regulated GASA/GAST/Snakin family protein precursor, expressed
LOC_Os03g55734	SSA3 - 2S albumin seed storage family protein precursor, expressed
LOC_Os03g55740	SSA4 - 2S albumin seed storage family protein precursor, expressed
LOC_Os03g56682	DEFL40 - Defensin and Defensin-like DEFL family
LOC_Os03g57970	LTPL73 - Protease inhibitor/seed storage/LTP family protein precursor, expressed
LOC_Os03g57980	LTPL99 - Protease inhibitor/seed storage/LTP family protein precursor, expressed
LOC_Os03g57990	LTPL74 - Protease inhibitor/seed storage/LTP family protein precursor, expressed
LOC_Os03g58670	LTPL119 - Protease inhibitor/seed storage/LTP family protein precursor, expressed
LOC_Os03g59380	LTPL28 - Protease inhibitor/seed storage/LTP family protein precursor, expressed
LOC_Os03g60840	BBTI13 - Bowman-Birk type bran trypsin inhibitor precursor, expressed
LOC_Os04g05500	MEGL8 - Maternally expressed gene MEG family protein precursor, expressed
LOC_Os04g05550	MEGL10 - Maternally expressed gene MEG family protein precursor, expressed
LOC_Os04g06340	MEGL11 - Maternally expressed gene MEG family protein precursor, expressed
LOC_Os04g06530	MEGL12 - Maternally expressed gene MEG family protein precursor, expressed
LOC_Os04g09390	HEV3 - Hevein family protein precursor, expressed
LOC_Os04g09520	LTPL59 - Protease inhibitor/seed storage/LTP family protein precursor, putative, expressed
LOC_Os04g11130	DEF9 - Defensin and Defensin-like DEFL family, expressed
LOC_Os04g11165	gamma-thionin family domain containing protein, expressed
LOC_Os04g11195	gamma-thionin family domain containing protein, expressed
LOC_Os04g11750	expressed protein
LOC_Os04g14080	expressed protein
LOC_Os04g15740	DEFL50 - Defensin and Defensin-like DEFL family, expressed
LOC_Os04g15765	retrotransposon protein, putative, unclassified
LOC_Os04g18350	retrotransposon protein, putative, unclassified, expressed
LOC_Os04g22210	SCP-like extracellular protein, expressed
LOC_Os04g22235	expressed protein
LOC_Os04g22330	SCP-like extracellular protein, expressed
LOC_Os04g22340	SCP-like extracellular protein, expressed
LOC_Os04g24130	expressed protein
LOC_Os04g26190	pollen allergen, putative, expressed
LOC_Os04g26200	hypothetical protein
LOC_Os04g28720	RALFL32 - Rapid ALkalinization Factor RALF family protein precursor, putative, expressed
LOC_Os04g28805	expressed protein
LOC_Os04g28830	RALFL34 - Rapid ALkalinization Factor RALF family protein precursor, putative, expressed
LOC_Os04g28840	RALFL35 - Rapid ALkalinization Factor RALF family protein precursor, putative, expressed
LOC_Os04g28850	RALFL36 - Rapid ALkalinization Factor RALF family protein precursor, expressed
LOC_Os04g29550	RIPER2 - Ripening-related family protein precursor, expressed
LOC_Os04g29580	OsWAK37 - OsWAK short gene, expressed
LOC_Os04g31250	DEFL49 - Defensin and Defensin-like DEFL family, expressed
LOC_Os04g31410	RALFL37 - Rapid ALkalinization Factor RALF family protein precursor, expressed
LOC_Os04g31430	RALFL30 - Rapid ALkalinization Factor RALF family protein precursor, putative, expressed
LOC_Os04g31460	RALFL39 - Rapid ALkalinization Factor RALF family protein precursor, expressed
LOC_Os04g31484	RALFL20 - Rapid ALkalinization Factor RALF family protein precursor, expressed
LOC_Os04g31520	RALFL21 - Rapid ALkalinization Factor RALF family protein precursor, expressed
LOC_Os04g31550	RALFL22 - Rapid ALkalinization Factor RALF family protein precursor, expressed
LOC_Os04g32700	LEML3 - Anther-specific LEM1 family protein precursor, expressed
LOC_Os04g33520	RCLEA6 - Root cap and Late embryogenesis related family protein precursor, expressed
LOC_Os04g33920	LTPL102 - Protease inhibitor/seed storage/LTP family protein precursor, expressed
LOC_Os04g33930	LTPL103 - Protease inhibitor/seed storage/LTP family protein precursor, expressed
LOC_Os04g38840	LTPL81 - Protease inhibitor/seed storage/LTP family protein precursor, expressed
LOC_Os04g39110	GASR4 - Gibberellin-regulated GASA/GAST/Snakin family protein precursor, expressed
LOC_Os04g41620	CHIT2 - Chitinase family protein precursor, expressed
LOC_Os04g41640	HEV2 - Hevein family protein precursor, expressed
LOC_Os04g41680	CHIT3 - Chitinase family protein precursor, expressed
LOC_Os04g41780	expressed protein
LOC_Os04g44130	DEF12 - Defensin and Defensin-like DEFL family, expressed
LOC_Os04g44470	KUN1 - Kunitz-type trypsin inhibitor precursor, expressed
LOC_Os04g44600	CRP1 - Cysteine-rich family protein precursor, expressed
LOC_Os04g44780	beta-expansin precursor, putative, expressed
LOC_Os04g45060	MYB family transcription factor, putative, expressed
LOC_Os04g46740	pectinesterase, putative, expressed
LOC_Os04g46810	LTPL120 - Protease inhibitor/seed storage/LTP family protein precursor, expressed
LOC_Os04g46820	LTPL121 - Protease inhibitor/seed storage/LTP family protein precursor, putative, expressed
LOC_Os04g46830	LTPL122 - Protease inhibitor/seed storage/LTP family protein precursor, expressed
LOC_Os04g49850	expressed protein
LOC_Os04g50850	aspartyl protease family, putative, expressed
LOC_Os04g51760	expressed protein
LOC_Os04g52250	LTPL123 - Protease inhibitor/seed storage/LTP family protein precursor, expressed
LOC_Os04g52260	LTPL124 - Protease inhibitor/seed storage/LTP family protein precursor, expressed
LOC_Os04g54090	RALFL18 - Rapid ALkalinization Factor RALF family protein precursor, expressed
LOC_Os04g54100	exostosin family protein, putative, expressed
LOC_Os04g54490	expressed protein
LOC_Os04g55150	UBA/TS-N domain containing protein, expressed
LOC_Os04g55170	LTPL126 - Protease inhibitor/seed storage/LTP family protein precursor, expressed
LOC_Os04g58120	CRP2 - Cysteine-rich family protein precursor, expressed
LOC_Os04g58555	X8 domain containing protein, expressed
LOC_Os04g59370	thaumatin, putative, expressed
LOC_Os05g01680	RCLEA7 - Root cap and Late embryogenesis related family protein precursor, expressed
LOC_Os05g04690	CHIT11 - Chitinase family protein precursor, expressed
LOC_Os05g06780	LTPL104 - Protease inhibitor/seed storage/LTP family protein precursor, expressed
LOC_Os05g13340	expressed protein
LOC_Os05g13430	expressed protein
LOC_Os05g16395	expressed protein
LOC_Os05g18070	retrotransposon protein, putative, Ty3-gypsy subclass, expressed
LOC_Os05g18860	STIGL2 - Stigma-specific Stig1 family protein precursor, putative, expressed
LOC_Os05g18940	STIGL3 - Stigma-specific Stig1 family protein precursor, putative, expressed
LOC_Os05g21080	retrotransposon, putative, centromere-specific, expressed
LOC_Os05g26240	PROLM1 - Prolamin precursor, expressed
LOC_Os05g26250	PROLM3 - Prolamin precursor, putative, expressed
LOC_Os05g26260	retrotransposon protein, putative, Ty3-gypsy subclass, expressed
LOC_Os05g26350	PROLM4 - Prolamin precursor, expressed
LOC_Os05g26359	PROLM6 - Prolamin precursor, putative, expressed
LOC_Os05g26368	prolamin precursor, putative, expressed
LOC_Os05g26377	PROLM9 - Prolamin precursor, expressed
LOC_Os05g26386	prolamin precursor, putative, expressed
LOC_Os05g26400	prolamin precursor, putative, expressed
LOC_Os05g26440	PROLM10 - Prolamin precursor, putative, expressed
LOC_Os05g26460	PROLM11 - Prolamin precursor, expressed
LOC_Os05g26480	PROLM12 - Prolamin precursor, putative, expressed
LOC_Os05g26490	PROLM13 - Prolamin precursor, expressed
LOC_Os05g26620	PROLM14 - Prolamin precursor, putative, expressed
LOC_Os05g26690	PROLM15 - Prolamin precursor, putative, expressed
LOC_Os05g26720	PROLM16 - Prolamin precursor, expressed
LOC_Os05g26750	PROLM17 - Prolamin precursor, expressed
LOC_Os05g26770	PROLM18 - Prolamin precursor, expressed
LOC_Os05g27970	POEI26 - Pollen Ole e I allergen and extensin family protein precursor, putative, expressed
LOC_Os05g28760	GCRP1 - Glycine and cysteine rich family protein precursor, putative, expressed
LOC_Os05g28770	GCRP9 - Glycine and cysteine rich family protein precursor, expressed
LOC_Os05g28780	GCRP10 - Glycine and cysteine rich family protein precursor, expressed
LOC_Os05g31280	GASR5 - Gibberellin-regulated GASA/GAST/Snakin family protein precursor, expressed
LOC_Os05g33130	CHIT17 - Chitinase family protein precursor, expressed
LOC_Os05g33140	CHIT5 - Chitinase family protein precursor, expressed
LOC_Os05g33150	CHIT6 - Chitinase family protein precursor, expressed
LOC_Os05g35690	GASR6 - Gibberellin-regulated GASA/GAST/Snakin family protein precursor, expressed
LOC_Os05g39880	expressed protein
LOC_Os05g40010	LTPL17 - Protease inhibitor/seed storage/LTP family protein precursor, expressed
LOC_Os05g41030	LTPL67 - Protease inhibitor/seed storage/LTP family protein precursor, expressed
LOC_Os05g41970	SSA1 - 2S albumin seed storage family protein precursor, expressed
LOC_Os05g45460	POEI52 - Pollen Ole e I allergen and extensin family protein precursor, expressed
LOC_Os05g45480	POEI45 - Pollen Ole e I allergen and extensin family protein precursor, expressed
LOC_Os05g45860	glucan endo-1,3-beta-glucosidase precursor, putative, expressed
LOC_Os05g46110	retrotransposon protein, putative, unclassified, expressed
LOC_Os05g46670	transposon protein, putative, unclassified, expressed
LOC_Os05g47730	LTPL153 - Protease inhibitor/seed storage/LTP family protein precursor, expressed
LOC_Os05g47940	RCLEA8 - Root cap and Late embryogenesis related family protein precursor, expressed
LOC_Os05g50490	X8 domain containing protein, expressed
LOC_Os05g51270	expressed protein
LOC_Os06g01580	LTPL127 - Protease inhibitor/seed storage/LTP family protein precursor, expressed
LOC_Os06g01920	expansin precursor, putative, expressed
LOC_Os06g02640	ripening-related protein precursor, putative, expressed
LOC_Os06g06340	LTPL20 - Protease inhibitor/seed storage/LTP family protein precursor, putative, expressed
LOC_Os06g07220	LTPL128 - Protease inhibitor/seed storage/LTP family protein precursor, expressed
LOC_Os06g11308	hypothetical protein
LOC_Os06g12440	LTPL60 - Protease inhibitor/seed storage/LTP family protein precursor, putative, expressed
LOC_Os06g14930	retrotransposon protein, putative, unclassified, expressed
LOC_Os06g15620	GASR7 - Gibberellin-regulated GASA/GAST/Snakin family protein precursor, expressed
LOC_Os06g16990	expressed protein
LOC_Os06g19250	expressed protein
LOC_Os06g22050	GCRP2 - Glycine and cysteine rich family protein precursor, putative, expressed
LOC_Os06g22680	hypothetical protein
LOC_Os06g22880	DEFL8 - Defensin and Defensin-like DEFL family
LOC_Os06g22925	expressed protein
LOC_Os06g23060	DEFL11 - Defensin and Defensin-like DEFL family
LOC_Os06g23360	LTPL70 - Protease inhibitor/seed storage/LTP family protein precursor, expressed
LOC_Os06g24290	SCP-like extracellular protein, expressed
LOC_Os06g24610	hypothetical protein
LOC_Os06g29730	RALFL28 - Rapid ALkalinization Factor RALF family protein precursor, expressed
LOC_Os06g30650	expressed protein
LOC_Os06g31060	PROLM23 - Prolamin precursor, expressed
LOC_Os06g31070	PROLM24 - Prolamin precursor, expressed
LOC_Os06g31280	THION1 - Plant thionin family protein precursor, putative, expressed
LOC_Os06g31800	THION2 - Plant thionin family protein precursor, expressed
LOC_Os06g31890	THION3 - Plant thionin family protein precursor, expressed
LOC_Os06g31930	thionin precursor protein, putative, expressed
LOC_Os06g31960	THION5 - Plant thionin family protein precursor, expressed
LOC_Os06g32020	THION6 - Plant thionin family protein precursor, expressed
LOC_Os06g32160	THION7 - Plant thionin family protein precursor, expressed
LOC_Os06g32200	THION8 - Plant thionin family protein precursor, putative, expressed
LOC_Os06g32240	THION9 - Plant thionin family protein precursor, expressed
LOC_Os06g32290	THION10 - Plant thionin family protein precursor
LOC_Os06g32320	THION11 - Plant thionin family protein precursor
LOC_Os06g32350	THION12 - Plant thionin family protein precursor
LOC_Os06g32355	conserved hypothetical protein
LOC_Os06g32370	THION16 - Plant thionin family protein precursor, putative
LOC_Os06g32550	THION14 - Plant thionin family protein precursor, putative, expressed
LOC_Os06g32600	THION15 - Plant thionin family protein precursor, expressed
LOC_Os06g34840	LTPL5 - Protease inhibitor/seed storage/LTP family protein precursor, putative, expressed
LOC_Os06g41580	LGC1, putative, expressed
LOC_Os06g43600	LTPL129 - Protease inhibitor/seed storage/LTP family protein precursor, expressed
LOC_Os06g45150	pollen allergen, putative, expressed
LOC_Os06g45200	group 3 pollen allergen, putative, expressed
LOC_Os06g45210	pollen allergen, putative, expressed
LOC_Os06g45320	DEFL27 - Defensin and Defensin-like DEFL family
LOC_Os06g45450	glucan endo-1,3-beta-glucosidase 12 precursor, putative, expressed
LOC_Os06g46780	LTPL61 - Protease inhibitor/seed storage/LTP family protein precursor, putative, expressed
LOC_Os06g46870	LTPL62 - Protease inhibitor/seed storage/LTP family protein precursor, putative, expressed
LOC_Os06g47200	LTPL85 - Protease inhibitor/seed storage/LTP family protein precursor, expressed
LOC_Os06g47360	beta-expansin precursor, putative, expressed
LOC_Os06g48665	expressed protein
LOC_Os06g48690	DEFL12 - Defensin and Defensin-like DEFL family, expressed
LOC_Os06g49190	LTPL154 - Protease inhibitor/seed storage/LTP family protein precursor, expressed
LOC_Os06g50240	thaumatin, putative, expressed
LOC_Os06g50960	expansin precursor, putative, expressed
LOC_Os06g51050	CHIT7 - Chitinase family protein precursor, expressed
LOC_Os06g51060	CHIT8 - Chitinase family protein precursor, expressed
LOC_Os06g51320	GASR8 - Gibberellin-regulated GASA/GAST/Snakin family protein precursor, expressed
LOC_Os07g01700	DEFL2 - Defensin and Defensin-like DEFL family, expressed
LOC_Os07g03180	GCRP3 - Glycine and cysteine rich family protein precursor, expressed
LOC_Os07g03288	SCP-like extracellular protein, expressed
LOC_Os07g03368	SCP-like extracellular protein, expressed
LOC_Os07g03377	SCP-like extracellular protein, expressed
LOC_Os07g03600	SCP-like extracellular protein, expressed
LOC_Os07g03610	SCP-like extracellular protein, expressed
LOC_Os07g03620	SCP-like extracellular protein, expressed
LOC_Os07g03680	SCP-like extracellular protein, expressed
LOC_Os07g03710	SCP-like extracellular protein, expressed
LOC_Os07g03740	SCP-like extracellular protein, expressed
LOC_Os07g03750	SCP-like extracellular protein, expressed
LOC_Os07g04730	expressed protein
LOC_Os07g07790	LTPL75 - Protease inhibitor/seed storage/LTP family protein precursor, expressed
LOC_Os07g07860	LTPL76 - Protease inhibitor/seed storage/LTP family protein precursor, expressed
LOC_Os07g07870	LTPL77 - Protease inhibitor/seed storage/LTP family protein precursor, putative, expressed
LOC_Os07g07920	LTPL100 - Protease inhibitor/seed storage/LTP family protein precursor, expressed
LOC_Os07g07930	LTPL78 - Protease inhibitor/seed storage/LTP family protein precursor, expressed
LOC_Os07g09610	CAMK_KIN1/SNF1/Nim1_like_AMPKh.1 - CAMK includes calcium/calmodulin depedent protein kinases, expressed
LOC_Os07g09970	LTPL84 - Protease inhibitor/seed storage/LTP family protein precursor, expressed
LOC_Os07g10535	expressed protein
LOC_Os07g10570	PROLM25 - Prolamin precursor, expressed
LOC_Os07g10580	PROLM26 - Prolamin precursor, expressed
LOC_Os07g11310	LTPL166 - Protease inhibitor/seed storage/LTP family protein precursor, expressed
LOC_Os07g11320	RAL1 - Seed allergenic protein RA5/RA14/RA17 precursor, expressed
LOC_Os07g11330	RAL2 - Seed allergenic protein RA5/RA14/RA17 precursor, expressed
LOC_Os07g11360	RAL3 - Seed allergenic protein RA5/RA14/RA17 precursor, expressed
LOC_Os07g11380	RAL4 - Seed allergenic protein RA5/RA14/RA17 precursor, expressed
LOC_Os07g11410	RAL5 - Seed allergenic protein RA5/RA14/RA17 precursor, expressed
LOC_Os07g11510	RAL6 - Seed allergenic protein RA5/RA14/RA17 precursor, expressed
LOC_Os07g11630	LTPL163 - Protease inhibitor/seed storage/LTP family protein precursor, expressed
LOC_Os07g11650	LTPL164 - Protease inhibitor/seed storage/LTP family protein precursor, expressed
LOC_Os07g11900	PROLM19 - Prolamin precursor, putative, expressed
LOC_Os07g11910	PROLM20 - Prolamin precursor, expressed
LOC_Os07g11920	PROLM22 - Prolamin precursor, expressed
LOC_Os07g12080	LTPL169 - Protease inhibitor/seed storage/LTP family protein precursor, expressed
LOC_Os07g12090	LTPL165 - Protease inhibitor/seed storage/LTP family protein precursor, expressed
LOC_Os07g13310	RALFL10 - Rapid ALkalinization Factor RALF family protein precursor, putative, expressed
LOC_Os07g13380	RALFL11 - Rapid ALkalinization Factor RALF family protein precursor, putative
LOC_Os07g13440	RALFL12 - Rapid ALkalinization Factor RALF family protein precursor, putative, expressed
LOC_Os07g13450	RALFL13 - Rapid ALkalinization Factor RALF family protein precursor, expressed
LOC_Os07g14070	SCP-like extracellular protein, expressed
LOC_Os07g14140	LTPL54 - Protease inhibitor/seed storage/LTP family protein precursor, putative, expressed
LOC_Os07g18750	LTPL42 - Protease inhibitor/seed storage/LTP family protein precursor, expressed
LOC_Os07g18960	GCRP14 - Glycine and cysteine rich family protein precursor, putative, expressed
LOC_Os07g18990	LTPL40 - Protease inhibitor/seed storage/LTP family protein precursor, expressed
LOC_Os07g19000	LTPL41 - Protease inhibitor/seed storage/LTP family protein precursor, expressed
LOC_Os07g20790	retrotransposon protein, putative, unclassified, expressed
LOC_Os07g23600	root cap protein, putative, expressed
LOC_Os07g23670	expressed protein
LOC_Os07g23690	root cap protein 1, putative, expressed
LOC_Os07g24820	thionin-like peptide, putative, expressed
LOC_Os07g26360	retrotransposon protein, putative, Ty3-gypsy subclass, expressed
LOC_Os07g27940	LTPL27 - Protease inhibitor/seed storage/LTP family protein precursor, putative, expressed
LOC_Os07g27980	BBTI10 - Bowman-Birk type bran trypsin inhibitor precursor, expressed
LOC_Os07g29230	LTPL63 - Protease inhibitor/seed storage/LTP family protein precursor, putative, expressed
LOC_Os07g30154	POEI2 - Pollen Ole e I allergen and extensin family protein precursor, putative, expressed
LOC_Os07g30590	LTPL55 - Protease inhibitor/seed storage/LTP family protein precursor, putative, expressed
LOC_Os07g33915	60S ribosomal protein L44, putative, expressed
LOC_Os07g35160	expressed protein
LOC_Os07g35350	glucan endo-1,3-beta-glucosidase precursor, putative, expressed
LOC_Os07g35520	glucan endo-1,3-beta-glucosidase precursor, putative, expressed
LOC_Os07g35560	glucan endo-1,3-beta-glucosidase precursor, putative, expressed
LOC_Os07g37045	expressed protein
LOC_Os07g39640	LTPL64 - Protease inhibitor/seed storage/LTP family protein precursor, expressed
LOC_Os07g39860	expressed protein
LOC_Os07g40100	POEI22 - Pollen Ole e I allergen and extensin family protein precursor, expressed
LOC_Os07g40240	GASR9 - Gibberellin-regulated GASA/GAST/Snakin family protein precursor, expressed
LOC_Os07g41290	DEFL13 - Defensin and Defensin-like DEFL family, expressed
LOC_Os07g43290	LTPL56 - Protease inhibitor/seed storage/LTP family protein precursor, expressed
LOC_Os07g43450	expressed protein
LOC_Os07g43940	X8 domain containing protein, expressed
LOC_Os07g46210	LTPL2 - Protease inhibitor/seed storage/LTP family protein precursor, expressed
LOC_Os07g47750	POEI49 - Pollen Ole e I allergen and extensin family protein precursor, expressed
LOC_Os07g47760	POEI50 - Pollen Ole e I allergen and extensin family protein precursor, expressed
LOC_Os08g01460	expressed protein
LOC_Os08g02270	hypothetical protein
LOC_Os08g03690	LTPL24 - Protease inhibitor/seed storage/LTP family protein precursor, expressed
LOC_Os08g04140	X8 domain containing protein, expressed
LOC_Os08g04520	DEFL53 - Defensin and Defensin-like DEFL family
LOC_Os08g09110	NB-ARC domain containing protein, expressed
LOC_Os08g10560	histone-like transcription factor and archaeal histone family protein, expressed
LOC_Os08g14700	glucan endo-1,3-beta-glucosidase precursor, putative, expressed
LOC_Os08g15505	expressed protein
LOC_Os08g15545	DEFL55 - Defensin and Defensin-like DEFL family, expressed
LOC_Os08g15550	DEFL56 - Defensin and Defensin-like DEFL family, expressed
LOC_Os08g15620	LTPL170 - Protease inhibitor/seed storage/LTP family protein precursor, expressed
LOC_Os08g20820	transposon protein, putative, unclassified
LOC_Os08g21450	transposon protein, putative, unclassified, expressed
LOC_Os08g24250	hypothetical protein
LOC_Os08g26480	transposon protein, putative, unclassified, expressed
LOC_Os08g27210	LTPL3 - Protease inhibitor/seed storage/LTP family protein precursor, putative, expressed
LOC_Os08g27678	protease inhibitor/seed storage/LTP family, putative, expressed
LOC_Os08g29320	expressed protein
LOC_Os08g35180	ECAGL4 - ECA1 gametogenesis related family protein precursor, putative, expressed
LOC_Os08g35665	LTPL48 - Protease inhibitor/seed storage/LTP family protein precursor, expressed
LOC_Os08g37890	expressed protein
LOC_Os08g37930	beta-expansin precursor, putative, expressed
LOC_Os08g38750	ECAGL5 - ECA1 gametogenesis related family protein precursor, putative, expressed
LOC_Os08g40600	thaumatin, putative, expressed
LOC_Os08g41100	CHIT12 - Chitinase family protein precursor, expressed
LOC_Os08g41360	expressed protein
LOC_Os08g41410	glucan endo-1,3-beta-glucosidase precursor, putative, expressed
LOC_Os08g42040	LTPL80 - Protease inhibitor/seed storage/LTP family protein precursor, expressed
LOC_Os08g43240	LTPL97 - Protease inhibitor/seed storage/LTP family protein precursor, expressed
LOC_Os08g43290	LTPL44 - Protease inhibitor/seed storage/LTP family protein precursor, expressed
LOC_Os08g43510	thaumatin, putative, expressed
LOC_Os09g02160	DEFL47 - Defensin and Defensin-like DEFL family, expressed
LOC_Os09g03540	transposon protein, putative, unclassified
LOC_Os09g04390	hypothetical protein
LOC_Os09g06900	retrotransposon protein, putative, unclassified, expressed
LOC_Os09g10090	retrotransposon protein, putative, unclassified
LOC_Os09g10865	expressed protein
LOC_Os09g11140	expressed protein
LOC_Os09g11200	THION33 - Plant thionin family protein precursor, putative
LOC_Os09g11210	THION35 - Plant thionin family protein precursor, putative, expressed
LOC_Os09g11790	DEFL14 - Defensin and Defensin-like DEFL family, expressed
LOC_Os09g12590	transporter family protein, putative, expressed
LOC_Os09g13930	LTPL4 - Protease inhibitor/seed storage/LTP family protein precursor, expressed
LOC_Os09g21060	expressed protein
LOC_Os09g21080	expressed protein
LOC_Os09g24350	THION32 - Plant thionin family protein precursor, expressed
LOC_Os09g24840	GASR10 - Gibberellin-regulated GASA/GAST/Snakin family protein precursor, expressed
LOC_Os09g25270	hypothetical protein
LOC_Os09g27380	zinc finger, C3HC4 type domain containing protein, expressed
LOC_Os09g29690	beta-expansin precursor, putative, expressed
LOC_Os09g29710	beta-expansin precursor, putative, expressed
LOC_Os09g29740	beta-expansin precursor, putative, expressed
LOC_Os09g32080	CHIT13 - Chitinase family protein precursor, expressed
LOC_Os09g32120	expressed protein
LOC_Os09g32280	thaumatin, putative, expressed
LOC_Os09g32550	glucan endo-1,3-beta-glucosidase precursor, putative, expressed
LOC_Os09g32988	POEI18 - Pollen Ole e I allergen and extensin family protein precursor, expressed
LOC_Os09g35700	LTPL45 - Protease inhibitor/seed storage/LTP family protein precursor, expressed
LOC_Os09g36560	thaumatin, putative, expressed
LOC_Os09g36720	expressed protein
LOC_Os09g38784	retrotransposon protein, putative, unclassified, expressed
LOC_Os10g02330	hypothetical protein
LOC_Os10g02625	gibberellin regulated protein, putative, expressed
LOC_Os10g04400	transferase family protein, putative, expressed
LOC_Os10g05150	KAZ2 - Kazal-type serine protease inhibitor precursor, putative, expressed
LOC_Os10g05600	thaumatin-like protein 1 precursor, putative, expressed
LOC_Os10g05660	thaumatin, putative, expressed
LOC_Os10g05720	LTPL37 - Protease inhibitor/seed storage/LTP family protein precursor, expressed
LOC_Os10g05750	POEI3 - Pollen Ole e I allergen and extensin family protein precursor, expressed
LOC_Os10g05790	POEI4 - Pollen Ole e I allergen and extensin family protein precursor, expressed
LOC_Os10g05820	POEI5 - Pollen Ole e I allergen and extensin family protein precursor, expressed
LOC_Os10g05840	POEI6 - Pollen Ole e I allergen and extensin family protein precursor, expressed
LOC_Os10g05860	POEI7 - Pollen Ole e I allergen and extensin family protein precursor, putative, expressed
LOC_Os10g05880	POEI8 - Pollen Ole e I allergen and extensin family protein precursor, putative, expressed
LOC_Os10g05910	POEI9 - Pollen Ole e I allergen and extensin family protein precursor, expressed
LOC_Os10g05930	POEI10 - Pollen Ole e I allergen and extensin family protein precursor, expressed
LOC_Os10g05950	POEI11 - Pollen Ole e I allergen and extensin family protein precursor, expressed
LOC_Os10g05970	POEI12 - Pollen Ole e I allergen and extensin family protein precursor, expressed
LOC_Os10g05980	POEI13 - Pollen Ole e I allergen and extensin family protein precursor, expressed
LOC_Os10g05990	POEI14 - Pollen Ole e I allergen and extensin family protein precursor, expressed
LOC_Os10g06000	POEI15 - Pollen Ole e I allergen and extensin family protein precursor, expressed
LOC_Os10g07606	hypothetical protein
LOC_Os10g08780	expressed protein
LOC_Os10g09920	LTPL132 - Protease inhibitor/seed storage/LTP family protein precursor, putative, expressed
LOC_Os10g11370	LTPL87 - Protease inhibitor/seed storage/LTP family protein precursor, putative, expressed
LOC_Os10g11730	LTPL88 - Protease inhibitor/seed storage/LTP family protein precursor, expressed
LOC_Os10g13850	POEI17 - Pollen Ole e I allergen and extensin family protein precursor, expressed
LOC_Os10g13914	POEI27 - Pollen Ole e I allergen and extensin family protein precursor, expressed
LOC_Os10g14194	POEI28 - Pollen Ole e I allergen and extensin family protein precursor, expressed
LOC_Os10g18170	RALFL16 - Rapid ALkalinization Factor RALF family protein precursor, putative, expressed
LOC_Os10g19892	expressed protein
LOC_Os10g19894	expressed protein
LOC_Os10g19898	expressed protein
LOC_Os10g19902	expressed protein
LOC_Os10g19904	expressed protein
LOC_Os10g19912	expressed protein
LOC_Os10g19914	hypothetical protein
LOC_Os10g19925	expressed protein
LOC_Os10g20540	DEFL69 - Defensin and Defensin-like DEFL family
LOC_Os10g20550	DEFL70 - Defensin and Defensin-like DEFL family, expressed
LOC_Os10g20560	DEFL81 - Defensin and Defensin-like DEFL family
LOC_Os10g20650	glucan endo-1,3-beta-glucosidase-related, putative, expressed
LOC_Os10g20830	LTPL133 - Protease inhibitor/seed storage/LTP family protein precursor, expressed
LOC_Os10g20840	LTPL134 - Protease inhibitor/seed storage/LTP family protein precursor, putative, expressed
LOC_Os10g20860	protease inhibitor/seed storage/LTP family, putative, expressed
LOC_Os10g20880	LTPL136 - Protease inhibitor/seed storage/LTP family protein precursor, putative, expressed
LOC_Os10g20890	LTPL137 - Protease inhibitor/seed storage/LTP family protein precursor, expressed
LOC_Os10g21479	expressed protein
LOC_Os10g22590	POEI24 - Pollen Ole e I allergen and extensin family protein precursor, expressed
LOC_Os10g24240	transposon protein, putative, unclassified
LOC_Os10g28380	MTN26L3 - MtN26 family protein precursor, putative, expressed
LOC_Os10g28400	MTN26L4 - MtN26 family protein precursor, expressed
LOC_Os10g29570	late embryogenesis abundant protein D-34, putative, expressed
LOC_Os10g30340	expansin precursor, putative, expressed
LOC_Os10g34450	expressed protein
LOC_Os10g34760	RIPER3 - Ripening-related family protein precursor, putative, expressed
LOC_Os10g34770	RIPER4 - Ripening-related family protein precursor, putative, expressed
LOC_Os10g34840	RIPER6 - Ripening-related family protein precursor, expressed
LOC_Os10g34884	RIPER7 - Ripening-related family protein precursor, expressed
LOC_Os10g34896	RIPER8 - Ripening-related family protein precursor
LOC_Os10g34902	RIPER9 - Ripening-related family protein precursor, putative, expressed
LOC_Os10g35360	expressed protein
LOC_Os10g36070	LTPL155 - Protease inhibitor/seed storage/LTP family protein precursor, putative, expressed
LOC_Os10g36090	LTPL156 - Protease inhibitor/seed storage/LTP family protein precursor, putative, expressed
LOC_Os10g36100	LTPL157 - Protease inhibitor/seed storage/LTP family protein precursor, expressed
LOC_Os10g36110	LTPL158 - Protease inhibitor/seed storage/LTP family protein precursor, expressed
LOC_Os10g36160	LTPL159 - Protease inhibitor/seed storage/LTP family protein precursor, expressed
LOC_Os10g36170	LTPL160 - Protease inhibitor/seed storage/LTP family protein precursor, expressed
LOC_Os10g37290	DEFL6 - Defensin and Defensin-like DEFL family, expressed
LOC_Os10g38100	thaumatin-like protein precursor, putative, expressed
LOC_Os10g38730	glutathione S-transferase, putative, expressed
LOC_Os10g39680	CHIT14 - Chitinase family protein precursor, expressed
LOC_Os10g39700	CHIT15 - Chitinase family protein precursor, putative, expressed
LOC_Os10g39890	POEI31 - Pollen Ole e I allergen and extensin family protein precursor, putative, expressed
LOC_Os10g40420	LTPL138 - Protease inhibitor/seed storage/LTP family protein precursor, expressed
LOC_Os10g40430	LTPL139 - Protease inhibitor/seed storage/LTP family protein precursor, expressed
LOC_Os10g40440	LTPL140 - Protease inhibitor/seed storage/LTP family protein precursor, expressed
LOC_Os10g40460	LTPL141 - Protease inhibitor/seed storage/LTP family protein precursor, expressed
LOC_Os10g40470	LTPL142 - Protease inhibitor/seed storage/LTP family protein precursor, putative, expressed
LOC_Os10g40480	LTPL143 - Protease inhibitor/seed storage/LTP family protein precursor, expressed
LOC_Os10g40510	LTPL144 - Protease inhibitor/seed storage/LTP family protein precursor, expressed
LOC_Os10g40520	LTPL145 - Protease inhibitor/seed storage/LTP family protein precursor, expressed
LOC_Os10g40530	LTPL146 - Protease inhibitor/seed storage/LTP family protein precursor, expressed
LOC_Os10g40614	LTPL147 - Protease inhibitor/seed storage/LTP family protein precursor, expressed
LOC_Os10g41980	RALFL26 - Rapid ALkalinization Factor RALF family protein precursor, expressed
LOC_Os10g41999	RALFL27 - Rapid ALkalinization Factor RALF family protein precursor, expressed
LOC_Os10g42020	RALFL29 - Rapid ALkalinization Factor RALF family protein precursor, expressed
LOC_Os10g42030	expressed protein
LOC_Os10g42150	transposon protein, putative, unclassified, expressed
LOC_Os11g02165	LTPL57 - Protease inhibitor/seed storage/LTP family protein precursor, expressed
LOC_Os11g02330	LTPL22 - Protease inhibitor/seed storage/LTP family protein precursor, expressed
LOC_Os11g02350	LTPL25 - Protease inhibitor/seed storage/LTP family protein precursor, expressed
LOC_Os11g02379	LTPL6 - Protease inhibitor/seed storage/LTP family protein precursor, expressed
LOC_Os11g02389	protease inhibitor/seed storage/LTP family, putative, expressed
LOC_Os11g02400	LTPL8 - Protease inhibitor/seed storage/LTP family protein precursor, expressed
LOC_Os11g02424	LTPL9 - Protease inhibitor/seed storage/LTP family protein precursor, expressed
LOC_Os11g02820	CRP10 - Cysteine-rich family protein precursor, expressed
LOC_Os11g03870	LTPL31 - Protease inhibitor/seed storage/LTP family protein precursor, expressed
LOC_Os11g05360	RCLEA9 - Root cap and Late embryogenesis related family protein precursor, putative, expressed
LOC_Os11g06730	ECAGL2 - ECA1 gametogenesis related family protein precursor, expressed
LOC_Os11g07560	hypothetical protein
LOC_Os11g08170	DEFL45 - Defensin and Defensin-like DEFL family, expressed
LOC_Os11g08220	DEFL28 - Defensin and Defensin-like DEFL family, expressed
LOC_Os11g08230	DEFL46 - Defensin and Defensin-like DEFL family, expressed
LOC_Os11g08240	DEFL29 - Defensin and Defensin-like DEFL family, expressed
LOC_Os11g08250	DEFL30 - Defensin and Defensin-like DEFL family, expressed
LOC_Os11g08260	DEFL31 - Defensin and Defensin-like DEFL family, expressed
LOC_Os11g08265	expressed protein
LOC_Os11g08270	DEFL32 - Defensin and Defensin-like DEFL family, expressed
LOC_Os11g08280	DEFL33 - Defensin and Defensin-like DEFL family, expressed
LOC_Os11g08285	expressed protein
LOC_Os11g14880	LTPL32 - Protease inhibitor/seed storage/LTP family protein precursor, expressed
LOC_Os11g15250	THION31 - Plant thionin family protein precursor, expressed
LOC_Os11g19680	transposon protein, putative, unclassified, expressed
LOC_Os11g24070	LTPL10 - Protease inhibitor/seed storage/LTP family protein precursor, expressed
LOC_Os11g26190	RALFL23 - Rapid ALkalinization Factor RALF family protein precursor, expressed
LOC_Os11g26340	RALFL24 - Rapid ALkalinization Factor RALF family protein precursor, expressed
LOC_Os11g26580	MEGL18 - Maternally expressed gene MEG family protein precursor, putative, expressed
LOC_Os11g26600	MEGL3 - Maternally expressed gene MEG family protein precursor, putative, expressed
LOC_Os11g26710	MEGL5 - Maternally expressed gene MEG family protein precursor, putative, expressed
LOC_Os11g26725	expressed protein
LOC_Os11g26795	expressed protein
LOC_Os11g26880	RALFL14 - Rapid ALkalinization Factor RALF family protein precursor, expressed
LOC_Os11g27540	CRP7 - Cysteine-rich family protein precursor, expressed
LOC_Os11g29420	LTPL30 - Protease inhibitor/seed storage/LTP family protein precursor, putative, expressed
LOC_Os11g30760	expressed protein
LOC_Os11g32070	expressed protein
LOC_Os11g32080	expressed protein
LOC_Os11g33000	SSA5 - 2S albumin seed storage family protein precursor, expressed
LOC_Os11g34305	transposon protein, putative, Mutator sub-class, expressed
LOC_Os11g34660	LTPL98 - Protease inhibitor/seed storage/LTP family protein precursor, expressed
LOC_Os11g34990	DEFL79 - Defensin and Defensin-like DEFL family
LOC_Os11g36940	glucan endo-1,3-beta-glucosidase precursor, putative, expressed
LOC_Os11g37190	allergen-related, putative, expressed
LOC_Os11g37270	AMBP1 - Antimicrobial peptide MBP-1 family protein precursor, expressed
LOC_Os11g37280	LTPL68 - Protease inhibitor/seed storage/LTP family protein precursor, expressed
LOC_Os11g37320	LTPL79 - Protease inhibitor/seed storage/LTP family protein precursor, putative, expressed
LOC_Os11g37930	WIP1 - Wound-induced protein precursor, expressed
LOC_Os11g37940	WIP2 - Wound-induced protein precursor, expressed
LOC_Os11g37950	WIP3 - Wound-induced protein precursor, expressed
LOC_Os11g37960	WIP4 - Wound-induced protein precursor, expressed
LOC_Os11g37970	WIP5 - Wound-induced protein precursor, expressed
LOC_Os11g39910	DEFL80 - Defensin and Defensin-like DEFL family, expressed
LOC_Os11g40520	LTPL161 - Protease inhibitor/seed storage/LTP family protein precursor, expressed
LOC_Os11g40530	LTPL162 - Protease inhibitor/seed storage/LTP family protein precursor, expressed
LOC_Os11g41700	transposon protein, putative, unclassified, expressed
LOC_Os11g42520	DEFL34 - Defensin and Defensin-like DEFL family, expressed
LOC_Os11g42525	hypothetical protein
LOC_Os11g42530	DEFL25 - Defensin and Defensin-like DEFL family
LOC_Os11g45360	DEFL15 - Defensin and Defensin-like DEFL family, expressed
LOC_Os11g47229	expressed protein
LOC_Os11g47269	DEFL44 - Defensin and Defensin-like DEFL family, expressed
LOC_Os11g47278	hypothetical protein
LOC_Os11g47370	expressed protein
LOC_Os12g02105	LTPL58 - Protease inhibitor/seed storage/LTP family protein precursor, expressed
LOC_Os12g02290	LTPL23 - Protease inhibitor/seed storage/LTP family protein precursor, expressed
LOC_Os12g02300	LTPL26 - Protease inhibitor/seed storage/LTP family protein precursor, expressed
LOC_Os12g02310	LTPL11 - Protease inhibitor/seed storage/LTP family protein precursor, expressed
LOC_Os12g02320	LTPL12 - Protease inhibitor/seed storage/LTP family protein precursor, expressed
LOC_Os12g02330	LTPL13 - Protease inhibitor/seed storage/LTP family protein precursor, expressed
LOC_Os12g02340	LTPL14 - Protease inhibitor/seed storage/LTP family protein precursor, expressed
LOC_Os12g02680	expressed protein
LOC_Os12g02800	CRP11 - Cysteine-rich family protein precursor, expressed
LOC_Os12g06750	DEFL16 - Defensin and Defensin-like DEFL family
LOC_Os12g06760	DEFL17 - Defensin and Defensin-like DEFL family
LOC_Os12g06770	hypothetical protein
LOC_Os12g06970	ECAGL3 - ECA1 gametogenesis related family protein precursor, putative, expressed
LOC_Os12g09465	expressed protein
LOC_Os12g11660	RALFL45 - Rapid ALkalinization Factor RALF family protein precursor, expressed
LOC_Os12g12000	RALFL46 - Rapid ALkalinization Factor RALF family protein precursor, expressed
LOC_Os12g12110	expressed protein
LOC_Os12g12220	DEFL18 - Defensin and Defensin-like DEFL family, expressed
LOC_Os12g12230	DEFL43 - Defensin and Defensin-like DEFL family, expressed
LOC_Os12g13610	CHIT9 - Chitinase family protein precursor, putative, expressed
LOC_Os12g13960	LTPL33 - Protease inhibitor/seed storage/LTP family protein precursor, expressed
LOC_Os12g15490	expressed protein
LOC_Os12g15960	CRP5 - Cysteine-rich family protein precursor, putative, expressed
LOC_Os12g16880	PROLM27 - Prolamin precursor, expressed
LOC_Os12g16890	PROLM28 - Prolamin precursor, expressed
LOC_Os12g17010	PROLM29 - Prolamin precursor, expressed
LOC_Os12g17030	PROLM30 - Prolamin precursor, expressed
LOC_Os12g21760	RALFL25 - Rapid ALkalinization Factor RALF family protein precursor, putative, expressed
LOC_Os12g25130	CRP8 - Cysteine-rich family protein precursor, expressed
LOC_Os12g25560	transposon protein, putative, unclassified, expressed
LOC_Os12g26960	THION34 - Plant thionin family protein precursor, expressed
LOC_Os12g26980	THION40 - Plant thionin family protein precursor
LOC_Os12g27020	THION41 - Plant thionin family protein precursor, putative, expressed
LOC_Os12g27025	expressed protein
LOC_Os12g27850	LGC1, putative, expressed
LOC_Os12g27950	expressed protein
LOC_Os12g27960	expressed protein
LOC_Os12g28770	POEI19 - Pollen Ole e I allergen and extensin family protein precursor, expressed
LOC_Os12g28880	LTPL110 - Protease inhibitor/seed storage/LTP family protein precursor, putative, expressed
LOC_Os12g29040	LTPL111 - Protease inhibitor/seed storage/LTP family protein precursor, expressed
LOC_Os12g29160	LTPL105 - Protease inhibitor/seed storage/LTP family protein precursor, putative, expressed
LOC_Os12g32960	LTPL148 - Protease inhibitor/seed storage/LTP family protein precursor, putative, expressed
LOC_Os12g35670	RALFL4 - Rapid ALkalinization Factor RALF family protein precursor, expressed
LOC_Os12g36000	expressed protein
LOC_Os12g36670	F-box/LRR-repeat protein 3, putative, expressed
LOC_Os12g38330	RALFL44 - Rapid ALkalinization Factor RALF family protein precursor, expressed
LOC_Os12g38340	RALFL42 - Rapid ALkalinization Factor RALF family protein precursor, expressed
LOC_Os12g38350	RALFL43 - Rapid ALkalinization Factor RALF family protein precursor, expressed
LOC_Os12g38360	RALFL31 - Rapid ALkalinization Factor RALF family protein precursor, expressed
LOC_Os12g38370	RALFL41 - Rapid ALkalinization Factor RALF family protein precursor, expressed
LOC_Os12g40180	expressed protein
LOC_Os12g41790	DEFL3 - Defensin and Defensin-like DEFL family, expressed
LOC_Os12g42290	expressed protein
LOC_Os12g43410	thaumatin, putative, expressed
