# Supplementary material for: Identification and Analysis of Genes Involved in Double Fertilization in Rice
Source: Int J Mol Sci. 2021 Nov 27;22(23):12850. doi: 10.3390/ijms222312850 (PMC8657449; doi:10.3390/ijms222312850)
Supplement: Supplementary file 1 [file ijms-22-12850-s001.zip › Table S18. The 1558 RLK genes in rice..xlsx]

## Sheet: Sheet1
Table S18. The 1558 RLK genes in rice.
Gene ID	Gene product	Expression type
LOC_Os01g10890	CAMK_KIN1/SNF1/Nim1_like.8 - CAMK includes calcium/calmodulin depedent protein kinases, expressed	PTRGs
LOC_Os01g10900	MRH1, putative, expressed
LOC_Os01g14510	BRASSINOSTEROID INSENSITIVE 1 precursor, putative, expressed
LOC_Os01g18800	CAMK_KIN1/SNF1/Nim1_like.9 - CAMK includes calcium/calmodulin depedent protein kinases, expressed
LOC_Os01g21970	protein kinase, putative, expressed
LOC_Os01g39970	protein kinase domain containing protein, putative, expressed
LOC_Os01g43910	CGMC_MAPKCMGC_2.4 - CGMC includes CDA, MAPK, GSK3, and CLKC kinases, expressed
LOC_Os01g50410	STE_MEKK_ste11_MAP3K.6 - STE kinases include homologs to sterile 7, sterile 11 and sterile 20 from yeast, expressed
LOC_Os01g51290	protein kinase family protein, putative, expressed
LOC_Os01g54350	protein kinase domain containing protein, expressed
LOC_Os01g55440	CAMK_KIN1/SNF1/Nim1_like.1 - CAMK includes calcium/calmodulin depedent protein kinases, expressed
LOC_Os01g57940	tyrosine protein kinase domain containing protein, putative, expressed
LOC_Os01g59360	CAMK_CAMK_like.10 - CAMK includes calcium/calmodulin depedent protein kinases, expressed
LOC_Os01g64490	protein kinase domain containing protein, expressed
LOC_Os01g66860	serine/threonine protein kinase, putative, expressed
LOC_Os02g02140	receptor protein kinase CLAVATA1 precursor, putative, expressed
LOC_Os02g06930	protein kinase, putative, expressed
LOC_Os02g13850	leucine-rich repeat-containing protein kinase family protein, putative, expressed
LOC_Os02g21700	STE_MEKK_ste11_MAP3K.8 - STE kinases include homologs to sterile 7, sterile 11 and sterile 20 from yeast, expressed
LOC_Os02g35300	transposon protein, putative, unclassified, expressed
LOC_Os02g39010	cyclin-dependent kinase G-1, putative, expressed
LOC_Os02g54590	serine threonine kinase, putative, expressed
LOC_Os02g57160	ELMO/CED-12 family protein, putative, expressed
LOC_Os03g03510	CAMK_KIN1/SNF1/Nim1_like.15 - CAMK includes calcium/calmodulin depedent protein kinases, expressed
LOC_Os03g05140	receptor-like protein kinase 2 precursor, putative, expressed
LOC_Os03g12520	STRUBBELIG-RECEPTOR FAMILY 7 precursor, putative, expressed
LOC_Os03g13820	protein kinase family protein, putative, expressed
LOC_Os03g17700	CGMC_MAPKCGMC_2_ERK.2 - CGMC includes CDA, MAPK, GSK3, and CLKC kinases, expressed
LOC_Os03g37120	retrotransposon protein, putative, unclassified, expressed
LOC_Os03g53410	protein kinase domain containing protein, expressed
LOC_Os03g56470	protein kinase family protein, putative, expressed
LOC_Os03g57450	CAMK_CAMK_like.2 - CAMK includes calcium/calmodulin depedent protein kinases, expressed
LOC_Os03g57780	protein kinase, putative, expressed
LOC_Os03g60150	protein kinase domain containing protein, expressed
LOC_Os04g41160	protein kinase, putative, expressed
LOC_Os04g49510	CAMK_CAMK_like.27 - CAMK includes calcium/calmodulin depedent protein kinases, expressed
LOC_Os04g51050	OsWAK53b - OsWAK receptor-like protein kinase, expressed
LOC_Os04g52840	tyrosine protein kinase domain containing protein, putative, expressed
LOC_Os04g54790	ELMO/CED-12 family protein, putative, expressed
LOC_Os05g04550	CAMK_KIN1/SNF1/Nim1_like.3 - CAMK includes calcium/calmodulin depedent protein kinases, expressed
LOC_Os05g14750	AGC_PVPK_like_kin82y.12 - ACG kinases include homologs to PKA, PKG and PKC, expressed
LOC_Os05g16824	SHR5-receptor-like kinase, putative, expressed
LOC_Os05g20150	TKL_IRAK_CrRLK1L-1.11 - The CrRLK1L-1 subfamily has homology to the CrRLK1L homolog, expressed
LOC_Os05g38770	protein kinase APK1B, chloroplast precursor, putative, expressed
LOC_Os05g42210	serine/threonine-protein kinase receptor precursor, putative, expressed
LOC_Os05g46750	STE_MEKK_ste11_MAP3K.18 - STE kinases include homologs to sterile 7, sterile 11 and sterile 20 from yeast, expressed
LOC_Os05g47560	serine/threonine-protein kinase SNT7, chloroplast precursor, putative, expressed
LOC_Os05g49140	CGMC_MAPKCMGC_2.8 - CGMC includes CDA, MAPK, GSK3, and CLKC kinases, expressed
LOC_Os05g50120	CGMC_MAPKCMGC_2.3 - CGMC includes CDA, MAPK, GSK3, and CLKC kinases, expressed
LOC_Os06g03610	TKL_IRAK_CrRLK1L-1.13 - The CrRLK1L-1 subfamily has homology to the CrRLK1L homolog, expressed
LOC_Os06g09860	expressed protein
LOC_Os06g29080	expressed protein
LOC_Os06g35200	receptor-like kinase, putative, expressed
LOC_Os06g37620	protein kinase family protein, putative, expressed
LOC_Os06g45240	inactive receptor kinase At2g26730 precursor, putative, expressed
LOC_Os06g48590	CGMC_MAPKCMGC_2_SLT2y_ERK.2 - CGMC includes CDA, MAPK, GSK3, and CLKC kinases, expressed
LOC_Os06g48980	protein kinase APK1B, chloroplast precursor, putative, expressed
LOC_Os06g50100	tyrosine protein kinase domain containing protein, putative, expressed
LOC_Os07g05370	TKL_IRAK_CrRLK1L-1.15 - The CrRLK1L-1 subfamily has homology to the CrRLK1L homolog, expressed
LOC_Os07g08000	expressed protein
LOC_Os07g08750	STE_PAK_Ste20_Slob_Wnk.1 - STE kinases include homologs to sterile 7, sterile 11 and sterile 20 from yeast, expressed
LOC_Os07g29330	serine/threonine-protein kinase CTR1, putative, expressed
LOC_Os07g35700	TKL_IRAK_DUF26-lc.4 - DUF26 kinases have homology to DUF26 containing loci, expressed
LOC_Os07g36590	serine/threonine-protein kinase receptor precursor, putative, expressed
LOC_Os07g38530	STE_PAK_Ste20_Slob_Wnk.4 - STE kinases include homologs to sterile 7, sterile 11 and sterile 20 from yeast, expressed
LOC_Os07g44290	CAMK_KIN1/SNF1/Nim1_like.29 - CAMK includes calcium/calmodulin depedent protein kinases, expressed
LOC_Os07g48090	CAMK_KIN1/SNF1/Nim1_like.30 - CAMK includes calcium/calmodulin depedent protein kinases, expressed
LOC_Os07g48290	AGC_AGC_other_RS6K_like.2 - ACG kinases include homologs to PKA, PKG and PKC, expressed
LOC_Os08g01270	protein kinase family protein, putative, expressed
LOC_Os08g28710	receptor protein kinase CRINKLY4 precursor, putative, expressed
LOC_Os08g35600	tyrosine protein kinase domain containing protein, putative, expressed
LOC_Os08g40270	lectin-like protein kinase, putative, expressed
LOC_Os08g40990	receptor-like protein kinase 1, putative, expressed
LOC_Os08g42750	CAMK_CAMK_like.37 - CAMK includes calcium/calmodulin depedent protein kinases, expressed
LOC_Os09g33910	CAMK_CAMK_like.39 - CAMK includes calcium/calmodulin depedent protein kinases, expressed
LOC_Os09g39930	tyrosine protein kinase domain containing protein, putative, expressed
LOC_Os10g33040	receptor-like protein kinase precursor, putative, expressed
LOC_Os10g33650	CK1_CaseinKinase_1.9 - CK1 includes the casein kinase 1 kinases, expressed
LOC_Os10g37190	protein kinase domain containing protein, expressed
LOC_Os10g39670	protein kinase family protein, putative, expressed
LOC_Os11g10100	STE_MEKK_ste11_MAP3K.3 - STE kinases include homologs to sterile 7, sterile 11 and sterile 20 from yeast, expressed
LOC_Os11g11000	ELMO/CED-12 family protein, putative, expressed
LOC_Os11g13860	cyclin-dependent kinase, putative, expressed
LOC_Os11g40550	receptor kinase, putative, expressed
LOC_Os11g42440	expressed protein
LOC_Os12g01510	MRH1, putative, expressed
LOC_Os12g06670	protein kinase family protein, putative, expressed
LOC_Os12g12860	CAMK_CAMK_like.46 - CAMK includes calcium/calmodulin depedent protein kinases, expressed
LOC_Os12g38860	transposon protein, putative, unclassified, expressed
LOC_Os01g02410	protein kinase domain containing protein, expressed
LOC_Os01g02440	Ser/Thr receptor-like kinase, putative, expressed
LOC_Os01g02550	protein kinase domain containing protein, expressed
LOC_Os01g02580	protein kinase domain containing protein, expressed
LOC_Os01g02610	protein kinase domain containing protein, expressed
LOC_Os01g02680	protein kinase domain containing protein, expressed
LOC_Os01g02780	TAK33, putative, expressed
LOC_Os01g02790	protein kinase domain containing protein, expressed
LOC_Os01g02810	resistance-related receptor-like kinase, putative, expressed
LOC_Os01g03370	senescence-induced receptor-like serine/threonine-protein kinase precursor, putative, expressed
LOC_Os01g06240	protein kinase, putative, expressed
LOC_Os01g10700	D-mannose binding lectin family protein, expressed
LOC_Os01g10710	receptor-like protein kinase, putative, expressed
LOC_Os01g23970	cysteine-rich receptor protein kinase, putative, expressed
LOC_Os01g26280	OsWAK8 - OsWAK receptor-like protein kinase, expressed
LOC_Os01g36500	TKL_IRAK_DUF26-lh.5 - DUF26 kinases have homology to DUF26 containing loci, expressed
LOC_Os01g38840	TKL_IRAK_DUF26-le.1 - DUF26 kinases have homology to DUF26 containing loci, expressed
LOC_Os01g38900	TKL_IRAK_DUF26-le.2 - DUF26 kinases have homology to DUF26 containing loci, expressed
LOC_Os01g39350	protein kinase domain containing protein, expressed
LOC_Os01g65010	serine/threonine-protein kinase receptor precursor, putative, expressed
LOC_Os02g06160	cysteine-rich receptor-like protein kinase 16 precursor, putative, expressed
LOC_Os02g08240	STE_PAK_Ste20_STLK.1 - STE kinases include homologs to sterile 7, sterile 11 and sterile 20 from yeast, expressed
LOC_Os02g13410	leucine-rich repeat family protein, putative, expressed
LOC_Os02g13420	leucine-rich repeat receptor protein kinase EXS precursor, putative, expressed
LOC_Os02g20140	protein kinase domain containing protein, expressed
LOC_Os02g34790	receptor-like protein kinase 5 precursor, putative, expressed
LOC_Os02g42110	wall-associated receptor kinase-like 22 precursor, putative, expressed
LOC_Os02g42620	protein kinase, putative, expressed
LOC_Os02g56400	OsWAK22 - OsWAK receptor-like protein kinase, expressed
LOC_Os02g56630	OsWAK24 - OsWAK receptor-like protein kinase, expressed
LOC_Os03g31000	protein kinase, putative, expressed
LOC_Os03g38710	protein kinase, putative, expressed
LOC_Os03g39150	protein kinase domain containing protein, expressed
LOC_Os03g44050	OsWAK27 - OsWAK receptor-like protein kinase, expressed
LOC_Os03g61870	transposon protein, putative, Mariner sub-class, expressed
LOC_Os04g01890	protein kinase, putative, expressed
LOC_Os04g03210	receptor kinase, putative, expressed
LOC_Os04g03579	protein kinase, putative, expressed
LOC_Os04g03830	OsWAK29 - OsWAK receptor-like protein kinase, expressed
LOC_Os04g04670	protein kinase, putative, expressed
LOC_Os04g04914	retrotransposon protein, putative, unclassified, expressed
LOC_Os04g05470	protein kinase, putative, expressed
LOC_Os04g05580	kinase, putative, expressed
LOC_Os04g06244	kinase, putative, expressed
LOC_Os04g13640	protein kinase domain containing protein, expressed
LOC_Os04g14570	expressed protein
LOC_Os04g21820	OsWAK33 - OsWAK receptor-like protein OsWAK-RLP, expressed
LOC_Os04g22470	SHR5-receptor-like kinase, putative, expressed
LOC_Os04g29680	OsWAK38 - OsWAK receptor-like protein kinase, expressed
LOC_Os04g29770	wall-associated receptor kinase-like 3 precursor, putative, expressed
LOC_Os04g29930	OsWAK42 - OsWAK receptor-like protein kinase, expressed
LOC_Os04g29990	OsWAK44 - OsWAK receptor-like protein kinase, expressed
LOC_Os04g30240	OsWAK60 - OsWAK receptor-like protein kinase, expressed
LOC_Os04g30270	protein kinase domain containing protein, expressed
LOC_Os04g34250	serine/threonine-protein kinase receptor precursor, putative, expressed
LOC_Os04g34290	protein kinase, putative, expressed
LOC_Os04g34300	serine/threonine-protein kinase receptor precursor, putative, expressed
LOC_Os04g34320	S-domain receptor-like protein kinase, putative, expressed
LOC_Os04g34410	serine/threonine-protein kinase receptor precursor, putative, expressed
LOC_Os04g42740	serine/threonine-protein kinase receptor precursor, putative, expressed
LOC_Os04g43730	OsWAK51 - OsWAK receptor-like protein kinase, expressed
LOC_Os04g54120	serine/threonine-protein kinase receptor precursor, putative, expressed
LOC_Os04g55760	OsWAK55 - OsWAK receptor-like protein kinase, expressed
LOC_Os04g56080	S-locus-like receptor protein kinase, putative, expressed
LOC_Os04g56090	S-locus-like receptor protein kinase, putative, expressed
LOC_Os04g56130	protein kinase domain containing protein, expressed
LOC_Os05g04460	OsWAK56 - OsWAK receptor-like protein kinase, expressed
LOC_Os05g14220	tyrosine protein kinase domain containing protein, putative, expressed
LOC_Os05g16430	SHR5-receptor-like kinase, putative, expressed
LOC_Os05g17050	transposon protein, putative, CACTA, En/Spm sub-class, expressed
LOC_Os05g17810	SHR5-receptor-like kinase, putative, expressed
LOC_Os05g25430	receptor-like protein kinase At3g46290 precursor, putative, expressed
LOC_Os05g45010	Leucine Rich Repeat family protein
LOC_Os06g07330	OsWAK63 - OsWAK receptor-like protein kinase, expressed
LOC_Os06g08690	leucine-rich repeat receptor protein kinase EXS precursor, putative, expressed
LOC_Os06g27840	retrotransposon protein, putative, LINE subclass, expressed
LOC_Os06g35870	lectin protein kinase family protein, putative, expressed
LOC_Os06g37750	S-locus-like receptor protein kinase, putative, expressed
LOC_Os06g38640	receptor-like protein kinase precursor, putative, expressed
LOC_Os06g38830	receptor-like protein kinase precursor, putative, expressed
LOC_Os06g41500	D-mannose binding lectin family protein, expressed
LOC_Os06g41510	D-mannose binding lectin family protein, expressed
LOC_Os06g47880	cell division control protein 2 homolog 3, putative, expressed
LOC_Os07g03900	lectin-like receptor kinase, putative, expressed
LOC_Os07g03920	lectin-like receptor kinase 7, putative, expressed
LOC_Os07g03930	lectin-like receptor kinase, putative, expressed
LOC_Os07g03950	lectin-like receptor kinase, putative, expressed
LOC_Os07g04000	lectin-like receptor kinase, putative, expressed
LOC_Os07g04010	lectin-like receptor kinase, putative, expressed
LOC_Os07g14490	OsWAK68 - OsWAK pseudogene, expressed
LOC_Os07g14820	expressed protein
LOC_Os07g15930	legume lectins beta domain containing protein, expressed
LOC_Os07g30410	TKL_IRAK_DUF26-la.2 - DUF26 kinases have homology to DUF26 containing loci, expressed
LOC_Os07g30510	TKL_IRAK_DUF26-la.3 - DUF26 kinases have homology to DUF26 containing loci, expressed
LOC_Os07g35630	retrotransposon protein, putative, Ty3-gypsy subclass, expressed
LOC_Os07g35650	TKL_IRAK_DUF26-lc.2 - DUF26 kinases have homology to DUF26 containing loci, expressed
LOC_Os07g47230	TKL_IRAK_DUF26-lh.10 - DUF26 kinases have homology to DUF26 containing loci, expressed
LOC_Os08g03070	lectin-like receptor kinase 1, putative, expressed
LOC_Os08g03090	lectin-like receptor kinase 1, putative, expressed
LOC_Os08g03100	receptor like protein kinase, putative, expressed
LOC_Os08g03150	receptor like protein kinase, putative, expressed
LOC_Os08g03160	lectin-like receptor kinase 1, putative, expressed
LOC_Os08g07940	disease resistance protein RPM1, putative, expressed
LOC_Os08g10150	SHR5-receptor-like kinase, putative, expressed
LOC_Os08g14940	receptor kinase, putative, expressed
LOC_Os08g14950	receptor-like protein kinase 2 precursor, putative, expressed
LOC_Os08g14960	receptor-like protein kinase precursor, putative, expressed
LOC_Os08g31010	retrotransposon protein, putative, unclassified, expressed
LOC_Os08g39180	OsWAK73 - OsWAK receptor-like protein kinase, expressed
LOC_Os08g39220	OsWAK75 - OsWAK receptor-like protein kinase, expressed
LOC_Os08g40650	senescence-induced receptor-like serine/threonine-protein kinase precursor, putative, expressed
LOC_Os09g09220	protein kinase domain containing protein, expressed
LOC_Os09g09500	lectin-like receptor kinase, putative, expressed
LOC_Os09g09510	legume lectins beta domain containing protein, expressed
LOC_Os09g17110	retrotransposon protein, putative, Ty1-copia subclass, expressed
LOC_Os09g17910	expressed protein
LOC_Os09g17970	senescence-induced receptor-like serine/threonine-protein kinase precursor, putative, expressed
LOC_Os09g18010	expressed protein
LOC_Os09g18020	senescence-induced receptor-like serine/threonine-protein kinase precursor, putative, expressed
LOC_Os09g18230	expressed protein
LOC_Os09g18260	senescence-induced receptor-like serine/threonine-protein kinase precursor, putative, expressed
LOC_Os09g18360	expressed protein
LOC_Os09g19229	protein kinase domain containing protein, expressed
LOC_Os09g19510	senescence-induced receptor-like serine/threonine-protein kinase precursor, putative, expressed
LOC_Os09g27150	protein kinase domain containing protein, expressed
LOC_Os09g37780	serine/threonine-protein kinase receptor precursor, putative, expressed
LOC_Os09g37840	carbohydrate binding protein, putative, expressed
LOC_Os09g38200	retrotransposon protein, putative, unclassified, expressed
LOC_Os10g02284	OsWAK97 - OsWAK receptor-like protein kinase, expressed
LOC_Os10g04000	STE_MEKK_ste11_MAP3K.22 - STE kinases include homologs to sterile 7, sterile 11 and sterile 20 from yeast, expressed
LOC_Os10g04720	TKL_IRAK_DUF26-la.5 - DUF26 kinases have homology to DUF26 containing loci, expressed
LOC_Os10g04730	TKL_IRAK_DUF26-la.6 - DUF26 kinases have homology to DUF26 containing loci, expressed
LOC_Os10g05400	OsWAK102 - OsWAK receptor-like cytoplasmic kinase OsWAK-RLCK, expressed
LOC_Os10g06030	OsWAK103 - OsWAK receptor-like protein kinase, expressed
LOC_Os10g06090	OsWAK104 - OsWAK receptor-like protein kinase, expressed
LOC_Os10g06140	OsWAK105 - OsWAK receptor-like protein kinase, expressed
LOC_Os10g07548	wall-associated receptor kinase-like 4 precursor, putative, expressed
LOC_Os10g07556	wall-associated receptor kinase-like 22 precursor, putative, expressed
LOC_Os10g09700	OsWAK110 - OsWAK receptor-like protein kinase, expressed
LOC_Os10g10030	OsWAK111 - OsWAK receptor-like protein kinase, expressed
LOC_Os10g17910	OsWAK114 - OsWAK receptor-like cytoplasmic kinase OsWAK-RLCK, expressed
LOC_Os10g17960	TKL_IRAK_DUF26-lc.26 - DUF26 kinases have homology to DUF26 containing loci, expressed
LOC_Os10g20120	serine/threonine-protein kinase receptor precursor, putative, expressed
LOC_Os11g03860	Ser/Thr protein kinase, putative, expressed
LOC_Os11g03880	D-mannose binding lectin family protein, expressed
LOC_Os11g07140	receptor kinase, putative, expressed
LOC_Os11g07160	receptor protein kinase CLAVATA1 precursor, putative, expressed
LOC_Os11g10310	receptor-like protein kinase 2 precursor, putative, expressed
LOC_Os11g12560	receptor-like protein kinase HAIKU2 precursor, putative, expressed
LOC_Os11g17380	protein kinase domain containing protein, expressed
LOC_Os11g17440	enoyl-CoA hydratase/isomerase family protein, expressed
LOC_Os11g26140	cysteine-rich receptor-like protein kinase 4 precursor, putative, expressed
LOC_Os11g35120	OsWAK116 - OsWAK receptor-like cytoplasmic kinase OsWAK-RLCK, expressed
LOC_Os11g35274	protein kinase domain containing protein, expressed
LOC_Os11g35860	OsWAK120 - OsWAK receptor-like protein kinase, expressed
LOC_Os11g36180	receptor kinase, putative, expressed
LOC_Os11g40810	receptor kinase, putative, expressed
LOC_Os11g40840	receptor-like protein kinase 2 precursor, putative, expressed
LOC_Os11g40890	expressed protein
LOC_Os11g44390	retrotransposon protein, putative, Ty1-copia subclass, expressed
LOC_Os11g45540	TKL_IRAK_DUF26-lh.11 - DUF26 kinases have homology to DUF26 containing loci, expressed
LOC_Os11g46860	wall-associated receptor kinase-like 4 precursor, putative, expressed
LOC_Os11g46870	protein kinase, putative, expressed
LOC_Os11g46880	protein kinase domain containing protein, expressed
LOC_Os11g46900	wall-associated receptor kinase 3 precursor, putative, expressed
LOC_Os11g46950	wall-associated receptor kinase-like 18 precursor, putative, expressed
LOC_Os11g47000	receptor-like protein kinase precursor, putative, expressed
LOC_Os11g47140	OsWAK123 - OsWAK receptor-like protein kinase, expressed
LOC_Os11g47150	OsWAK122 - OsWAK receptor-like protein kinase, expressed
LOC_Os11g47210	receptor-like protein kinase 5 precursor, putative, expressed
LOC_Os11g47290	receptor kinase, putative, expressed
LOC_Os11g47300	receptor-like protein kinase precursor, putative, expressed
LOC_Os12g03210	transposon protein, putative, Mariner sub-class, expressed
LOC_Os12g03650	D-mannose binding lectin family protein, expressed
LOC_Os12g23930	protein kinase domain containing protein, expressed
LOC_Os12g23940	protein kinase domain containing protein, expressed
LOC_Os12g23950	cyclin-dependent kinase G-2, putative, expressed
LOC_Os12g24140	cyclin-dependent kinase G-2, putative, expressed
LOC_Os04g24510	OsWAK36 - OsWAK receptor-like protein kinase, expressed
LOC_Os05g50830	protein kinase family protein, putative, expressed
LOC_Os04g45730	protein kinase domain containing protein, expressed
LOC_Os10g04010	STE_MEKK_ste11_MAP3K.23 - STE kinases include homologs to sterile 7, sterile 11 and sterile 20 from yeast, expressed
LOC_Os10g01560	serine/threonine-protein kinase, putative, expressed
LOC_Os01g50420	STE_MEKK_ste11_MAP3K.7 - STE kinases include homologs to sterile 7, sterile 11 and sterile 20 from yeast, expressed
LOC_Os09g18159	light repressible receptor protein kinase, putative, expressed
LOC_Os03g47470	STE_PAK_Ste20_STLK.4 - STE kinases include homologs to sterile 7, sterile 11 and sterile 20 from yeast, expressed
LOC_Os01g66250	S-locus-like receptor protein kinase, putative, expressed
LOC_Os06g47740	phytosulfokine receptor precursor, putative, expressed
LOC_Os09g30454	OsWAK87 - OsWAK receptor-like protein kinase, expressed
LOC_Os05g40180	serine/threonine-protein kinase stt7, chloroplast precursor, putative, expressed
LOC_Os03g16260	protein kinase, putative, expressed
LOC_Os03g12390	STE_MEK_ste7_MAP2K.6 - STE kinases include homologs to sterile 7, sterile 11 and sterile 20 from yeast, expressed
LOC_Os05g46760	STE_MEKK_ste11_MAP3K.19 - STE kinases include homologs to sterile 7, sterile 11 and sterile 20 from yeast, expressed
LOC_Os02g48200	lectin-like protein kinase, putative, expressed
LOC_Os08g02996	receptor-like kinase, putative, expressed
LOC_Os08g03170	lectin-like receptor kinase 1, putative, expressed
LOC_Os12g01140	AGC_PVPK_like_kin82y.2 - ACG kinases include homologs to PKA, PKG and PKC, expressed
LOC_Os03g17300	TKL_IRAK_CrRLK1L-1.7 - The CrRLK1L-1 subfamily has homology to the CrRLK1L homolog, expressed
LOC_Os11g01140	AGC_PVPK_like_kin82y.18 - ACG kinases include homologs to PKA, PKG and PKC, expressed
LOC_Os02g42150	OsWAK14 - OsWAK receptor-like protein kinase, expressed
LOC_Os01g57560	serine/threonine-protein kinase receptor precursor, putative, expressed
LOC_Os12g30150	CAMK_CAMK_like.47 - CAMK includes calcium/calmodulin depedent protein kinases, expressed
LOC_Os10g21090	ATP binding protein, putative, expressed
LOC_Os07g35750	TKL_IRAK_DUF26-ld.3 - DUF26 kinases have homology to DUF26 containing loci, expressed
LOC_Os02g07810	inactive receptor kinase At2g26730 precursor, putative, expressed
LOC_Os07g03890	lectin-like receptor kinase 7, putative, expressed
LOC_Os08g38560	receptor-like protein kinase 2 precursor, putative, expressed
LOC_Os11g01470	retrotransposon protein, putative, unclassified, expressed
LOC_Os11g03840	D-mannose binding lectin family protein, expressed
LOC_Os07g05740	receptor-like protein kinase 2 precursor, putative, expressed
LOC_Os01g47900	S-locus-like receptor protein kinase, putative, expressed
LOC_Os09g30190	receptor-like protein kinase 2 precursor, putative, expressed
LOC_Os08g03002	lectin-like receptor kinase 1, putative, expressed
LOC_Os02g58520	CAMK_CAMK_like.16 - CAMK includes calcium/calmodulin depedent protein kinases, expressed
LOC_Os12g05394	protein kinase, putative, expressed
LOC_Os02g43290	protein kinase domain containing protein, expressed
LOC_Os02g12660	protein kinase domain containing protein, putative, expressed
LOC_Os01g48040	S-locus-like receptor protein kinase, putative, expressed
LOC_Os12g23700	cyclin-dependent kinase G-2, putative, expressed
LOC_Os01g47810	S-locus-like receptor protein kinase, putative, expressed
LOC_Os01g02800	receptor-like kinase ARK1AS, putative, expressed
LOC_Os05g44970	senescence-induced receptor-like serine/threonine-protein kinase precursor, putative, expressed
LOC_Os11g07170	receptor kinase, putative, expressed
LOC_Os04g39180	nodulation receptor kinase precursor, putative, expressed
LOC_Os01g36550	protein kinase family protein, putative, expressed
LOC_Os06g02555	expressed protein
LOC_Os01g13270	AGC_PVPK_like_kin82y.4 - ACG kinases include homologs to PKA, PKG and PKC, expressed
LOC_Os11g38850	TKL_IRAK_DUF26-la.7 - DUF26 kinases have homology to DUF26 containing loci, expressed
LOC_Os07g04520	protein kinase, putative, expressed
LOC_Os03g48270	CAMK_CAMK_like.21 - CAMK includes calcium/calmodulin depedent protein kinases, expressed
LOC_Os05g03460	protein kinase, putative, expressed
LOC_Os12g42660	AGC_AGC_other_GWLd.1 - ACG kinases include homologs to PKA, PKG and PKC, expressed
LOC_Os07g04040	expressed protein
LOC_Os01g28730	protein kinase domain containing protein, expressed
LOC_Os01g70410	protein kinase, putative, expressed
LOC_Os04g23890	AGC_PVPK_like_kin82y.10 - ACG kinases include homologs to PKA, PKG and PKC, expressed
LOC_Os02g03410	CAMK_CAMK_like.12 - CAMK includes calcium/calmodulin depedent protein kinases, expressed
LOC_Os05g43840	CAMK_KIN1/SNF1/Nim1_like.25 - CAMK includes calcium/calmodulin depedent protein kinases, expressed
LOC_Os11g44250	protein kinase, putative, expressed
LOC_Os12g03690	D-mannose binding lectin family protein, expressed
LOC_Os04g59000	protein kinase family protein, putative, expressed
LOC_Os02g19550	lectin-like receptor kinase, putative, expressed
LOC_Os03g02980	CAMK_CAMK_like_ULKh_APGy.1 - CAMK includes calcium/calmodulin depedent protein kinases, expressed
LOC_Os08g08140	receptor-like kinase, putative, expressed
LOC_Os03g56250	LRR receptor-like protein kinase, putative, expressed
LOC_Os09g37880	serine/threonine-protein kinase receptor precursor, putative, expressed
LOC_Os05g28520	MRH1, putative, expressed
LOC_Os02g12350	histone deacetylase, putative, expressed
LOC_Os05g03620	TKL_IRAK_CR4L.4 - The CR4L subfamily has homology with Crinkly4, expressed
LOC_Os11g12530	receptor-like protein kinase 5 precursor, putative, expressed
LOC_Os03g03660	CAMK_CAMK_like.17 - CAMK includes calcium/calmodulin depedent protein kinases, expressed
LOC_Os06g49430	CGMC_MAPKCMGC_2.11 - CGMC includes CDA, MAPK, GSK3, and CLKC kinases, expressed
LOC_Os06g37670	S-locus-like receptor protein kinase, putative, expressed
LOC_Os01g02700	protein kinase domain containing protein, expressed
LOC_Os05g11790	CAMK_KIN1/SNF1/Nim1_like.19 - CAMK includes calcium/calmodulin depedent protein kinases, expressed
LOC_Os02g41580	CAMK_CAMK_like.14 - CAMK includes calcium/calmodulin depedent protein kinases, expressed
LOC_Os06g08710	receptor-like protein kinase precursor, putative, expressed
LOC_Os03g12570	expressed protein
LOC_Os02g02780	protein kinase family protein, putative, expressed
LOC_Os06g10160	tyrosine protein kinase domain containing protein, putative, expressed
LOC_Os10g38960	lectin-like receptor kinase, putative, expressed
LOC_Os10g06760	receptor-like protein kinase precursor, putative, expressed
LOC_Os07g01720	expressed protein
LOC_Os12g43640	receptor-like protein kinase HAIKU2 precursor, putative, expressed
LOC_Os03g63020	protein kinase domain containing protein, expressed
LOC_Os03g57510	CAMK_CAMK_like.23 - CAMK includes calcium/calmodulin depedent protein kinases, expressed
LOC_Os06g30130	cysteine-rich receptor-like protein kinase 10 precursor, putative, expressed
LOC_Os01g02730	TAK14, putative, expressed
LOC_Os04g34390	serine/threonine-protein kinase receptor precursor, putative, expressed
LOC_Os08g03030	retrotransposon protein, putative, Ty1-copia subclass, expressed
LOC_Os09g38700	STRUBBELIG-RECEPTOR FAMILY 5 precursor, putative, expressed
LOC_Os02g27310	TKL_IRAK_DUF26-lc.6 - DUF26 kinases have homology to DUF26 containing loci, expressed
LOC_Os06g18000	protein kinase domain containing protein, expressed
LOC_Os02g37830	protein kinase domain containing protein, expressed
LOC_Os03g55560	STE_MEKK_ste11_MAP3K.15 - STE kinases include homologs to sterile 7, sterile 11 and sterile 20 from yeast, expressed
LOC_Os01g45380	protein kinase domain containing protein, expressed
LOC_Os07g06570	receptor protein kinase CRINKLY4 precursor, putative, expressed
LOC_Os02g35760	STRUBBELIG-RECEPTOR FAMILY 7 precursor, putative, expressed
LOC_Os04g51040	OsWAK50 - OsWAK receptor-like protein kinase, expressed
LOC_Os01g59550	senescence-induced receptor-like serine/threonine-protein kinase precursor, putative, expressed
LOC_Os03g06330	tyrosine protein kinase domain containing protein, putative, expressed
LOC_Os04g35700	STE_MEKK_ste11_MAP3K.16 - STE kinases include homologs to sterile 7, sterile 11 and sterile 20 from yeast, expressed
LOC_Os03g60810	lectin-like receptor kinase, putative, expressed
LOC_Os11g10710	protein kinase domain containing protein, expressed
LOC_Os11g07124	EFR, putative, expressed
LOC_Os05g25450	TKL_IRAK_CrRLK1L-1.3 - The CrRLK1L-1 subfamily has homology to the CrRLK1L homolog, expressed
LOC_Os11g12620	receptor protein kinase CLAVATA1 precursor, putative, expressed
LOC_Os12g03810	CAMK_KIN1/SNF1/Nim1_like.37 - CAMK includes calcium/calmodulin depedent protein kinases, expressed
LOC_Os02g13965	lectin protein kinase family protein, putative, expressed
LOC_Os02g54600	STE_MEK_ste7_MAP2K.5 - STE kinases include homologs to sterile 7, sterile 11 and sterile 20 from yeast, expressed
LOC_Os11g47310	receptor kinase-like protein, identical, putative, expressed
LOC_Os01g65230	AGC_AGC_other_PDK1_Pk61C.1 - ACG kinases include homologs to PKA, PKG and PKC, expressed
LOC_Os06g40370	CAMK_KIN1/SNF1/Nim1_like.27 - CAMK includes calcium/calmodulin depedent protein kinases, expressed
LOC_Os03g22050	CAMK_KIN1/SNF1/Nim1_like.16 - CAMK includes calcium/calmodulin depedent protein kinases, expressed
LOC_Os08g15060	ATP binding protein, putative, expressed
LOC_Os05g02020	protein kinase APK1A, chloroplast precursor, putative, expressed
LOC_Os07g01710	phytosulfokine receptor precursor, putative, expressed
LOC_Os01g12420	receptor-like protein kinase, putative, expressed
LOC_Os02g30540	protein kinase, putative, expressed
LOC_Os12g10190	transposon protein, putative, unclassified, expressed
LOC_Os03g31070	protein kinase, putative, expressed
LOC_Os05g44770	receptor-like protein kinase 5 precursor, putative, expressed
LOC_Os03g18170	STE_MEKK_ste11_MAP3K.13 - STE kinases include homologs to sterile 7, sterile 11 and sterile 20 from yeast, expressed
LOC_Os06g26340	CGMC_MAPKCMGC_2.10 - CGMC includes CDA, MAPK, GSK3, and CLKC kinases, expressed
LOC_Os04g38910	atypical receptor-like kinase MARK, putative, expressed
LOC_Os02g04430	STRUBBELIG-RECEPTOR FAMILY 1 precursor, putative, expressed
LOC_Os02g49310	AGC_PVPK_like_kin82y.7 - ACG kinases include homologs to PKA, PKG and PKC, expressed
LOC_Os01g02310	expressed protein
LOC_Os05g41270	CAMK_CAMK_like.4 - CAMK includes calcium/calmodulin depedent protein kinases, expressed
LOC_Os01g15470	protein kinase, putative, expressed
LOC_Os07g06740	CAMK_CAMK_like.31 - CAMK includes calcium/calmodulin depedent protein kinases, expressed
LOC_Os02g12810	protein kinase domain containing protein, expressed
LOC_Os08g28890	protein kinase family protein, putative, expressed
LOC_Os06g45280	protein kinase APK1B, chloroplast precursor, putative, expressed
LOC_Os04g54020	receptor-like kinase, putative, expressed
LOC_Os03g60710	protein kinase domain containing protein, expressed
LOC_Os02g02600	serine/threonine-protein kinase Cx32, chloroplast precursor, putative, expressed
LOC_Os02g30900	protein kinase domain containing protein, expressed
LOC_Os01g05980	receptor kinase, putative, expressed
LOC_Os10g02500	serine/threonine-protein kinase BRI1-like 2 precursor, putative, expressed
LOC_Os03g31044	expressed protein
LOC_Os04g52606	SHR5-receptor-like kinase, putative, expressed
LOC_Os10g41290	AGC_PVPK_like_kin82y.17 - ACG kinases include homologs to PKA, PKG and PKC, expressed
LOC_Os04g59450	CAMK_CAMK_like.28 - CAMK includes calcium/calmodulin depedent protein kinases, expressed
LOC_Os12g06490	STE_PAK_Ste20_Slob_Wnk.6 - STE kinases include homologs to sterile 7, sterile 11 and sterile 20 from yeast, expressed
LOC_Os11g47160	receptor kinase 1, putative, expressed
LOC_Os12g27520	serine/threonine-protein kinase AFC2, putative, expressed
LOC_Os04g41510	serine/threonine-protein kinase GCN2, putative, expressed
LOC_Os03g12730	receptor protein kinase CLAVATA1 precursor, putative, expressed
LOC_Os11g02240	CAMK_KIN1/SNF1/Nim1_like.4 - CAMK includes calcium/calmodulin depedent protein kinases, expressed
LOC_Os06g22810	TKL_IRAK_CrRLK1L-1.14 - The CrRLK1L-1 subfamily has homology to the CrRLK1L homolog, expressed
LOC_Os07g47950	expressed protein
LOC_Os06g07070	BRASSINOSTEROID INSENSITIVE 1-associated receptor kinase 1 precursor, putative, expressed
LOC_Os05g04340	CGMC_GSK.6 - CGMC includes CDA, MAPK, GSK3, and CLKC kinases, expressed
LOC_Os01g67340	STRUBBELIG-RECEPTOR FAMILY 8 precursor, putative, expressed
LOC_Os01g66610	serine/threonine-protein kinase receptor precursor, putative, expressed
LOC_Os02g12380	histone deacetylase, putative, expressed
LOC_Os07g28820	ribonuclease 2-5A family protein, expressed
LOC_Os07g38120	CAMK_CAMK_like.34 - CAMK includes calcium/calmodulin depedent protein kinases, expressed
LOC_Os05g32170	TKL_IRAK_CR4L.5 - The CR4L subfamily has homology with Crinkly4, expressed
LOC_Os11g04170	CAMK_CAMK_like.42 - CAMK includes calcium/calmodulin depedent protein kinases, expressed
LOC_Os05g44290	protein kinase domain containing protein, expressed
LOC_Os08g38320	AGC_PVPK_like_kin82y.14 - ACG kinases include homologs to PKA, PKG and PKC, expressed
LOC_Os10g10870	protein kinase family protein, putative, expressed
LOC_Os03g55600	CAMK_CAMK_like.22 - CAMK includes calcium/calmodulin depedent protein kinases, expressed
LOC_Os01g45620	CGMC_MAPKCMGC_2.5 - CGMC includes CDA, MAPK, GSK3, and CLKC kinases, expressed
LOC_Os09g30150	AGC_PVPK_like_kin82y.16 - ACG kinases include homologs to PKA, PKG and PKC, expressed
LOC_Os06g06920	S-locus-like receptor protein kinase, putative, expressed
LOC_Os05g07740	receptor-like protein kinase 2 precursor, putative, expressed
LOC_Os02g02120	OsWAK11 - OsWAK receptor-like protein kinase, expressed
LOC_Os02g06090	phytosulfokine receptor precursor, putative, expressed
LOC_Os05g05160	CGMC_MAPKCGMC_2.1 - CGMC includes CDA, MAPK, GSK3, and CLKC kinases, expressed
LOC_Os11g36200	receptor-like protein kinase 2 precursor, putative, expressed
LOC_Os02g46090	CAMK_CAMK_like.15 - CAMK includes calcium/calmodulin depedent protein kinases, expressed
LOC_Os01g02840	resistance-related receptor-like kinase, putative, expressed
LOC_Os08g28870	receptor-like protein kinase 5 precursor, putative, expressed
LOC_Os07g48100	CAMK_KIN1/SNF1/Nim1_like.31 - CAMK includes calcium/calmodulin depedent protein kinases, expressed
LOC_Os10g13970	receptor-like kinase, putative, expressed
LOC_Os06g29120	STE_PAK_Ste20_STLK.5 - STE kinases include homologs to sterile 7, sterile 11 and sterile 20 from yeast, expressed
LOC_Os06g12590	protein kinase, putative, expressed
LOC_Os07g49470	protein kinase APK1B, chloroplast precursor, putative, expressed
LOC_Os07g33110	CAMK_CAMK_like.33 - CAMK includes calcium/calmodulin depedent protein kinases, expressed
LOC_Os05g50560	CGMC_MAPKCMGC_2.9 - CGMC includes CDA, MAPK, GSK3, and CLKC kinases, expressed
LOC_Os02g57420	protein kinase APK1A, chloroplast precursor, putative, expressed
LOC_Os01g46720	expressed protein
LOC_Os03g21230	leucine-rich repeat family protein, putative, expressed
LOC_Os06g09230	serine threonine kinase, putative, expressed
LOC_Os02g37880	cyclin G-associated kinase, putative, expressed
LOC_Os01g60700	serine/threonine-protein kinase NAK, putative, expressed
LOC_Os07g35690	TKL_IRAK_DUF26-lc.3 - DUF26 kinases have homology to DUF26 containing loci, expressed
LOC_Os02g06570	CAMK_KIN1/SNF1/Nim1_like.13 - CAMK includes calcium/calmodulin depedent protein kinases, expressed
LOC_Os06g02550	CPuORF21 - conserved peptide uORF-containing transcript, expressed
LOC_Os01g71000	protein kinase APK1B, chloroplast precursor, putative, expressed
LOC_Os02g17910	CK1_CaseinKinase_1.4 - CK1 includes the casein kinase 1 kinases, expressed
LOC_Os04g52630	leucine-rich repeat-containing protein kinase family protein, putative, expressed
LOC_Os04g52140	protein kinase domain containing protein, expressed
LOC_Os01g02750	protein kinase domain containing protein, expressed
LOC_Os01g39600	expressed protein
LOC_Os06g03970	receptor-like protein kinase 5 precursor, putative, expressed
LOC_Os09g36320	tyrosine protein kinase domain containing protein, putative, expressed
LOC_Os02g40240	receptor kinase, putative, expressed
LOC_Os10g37740	CGMC_GSK.9 - CGMC includes CDA, MAPK, GSK3, and CLKC kinases, expressed
LOC_Os10g36710	CAMK_CAMK_like.40 - CAMK includes calcium/calmodulin depedent protein kinases, expressed
LOC_Os12g37570	protein kinase family protein, putative, expressed
LOC_Os05g13780	C-5 cytosine-specific DNA methylase, putative, expressed
LOC_Os03g28270	Leucine Rich Repeat family protein, expressed
LOC_Os05g50810	CAMK_CAMK_like.5 - CAMK includes calcium/calmodulin depedent protein kinases, expressed
LOC_Os05g07300	serine/threonine-protein kinase receptor precursor, putative, expressed
LOC_Os11g07270	expressed protein
LOC_Os01g40590	tyrosine protein kinase domain containing protein, putative, expressed
LOC_Os05g11140	CK1_CaseinKinase_1a.5 - CK1 includes the casein kinase 1 kinases, expressed
LOC_Os03g21540	TKL_IRAK_CrRLK1L-1.8 - The CrRLK1L-1 subfamily has homology to the CrRLK1L homolog, expressed
LOC_Os12g38610	lectin-like receptor kinase, putative, expressed
LOC_Os02g52850	receptor-like protein kinase like protein, putative, expressed
LOC_Os07g41140	receptor-like protein kinase precursor, putative, expressed
LOC_Os06g51160	glycosyl transferase family 8, putative, expressed
LOC_Os03g28300	protein kinase domain containing protein, expressed
LOC_Os12g07990	protein kinase family protein, putative, expressed
LOC_Os01g05960	receptor kinase, putative, expressed
LOC_Os02g18320	BRASSINOSTEROID INSENSITIVE 1-associated receptor kinase 1 precursor, putative, expressed
LOC_Os11g11490	TKL_IRAK_CR4L.7 - The CR4L subfamily has homology with Crinkly4, expressed
LOC_Os12g40279	protein kinase domain containing protein, expressed
LOC_Os09g39640	protein kinase, putative, expressed
LOC_Os06g29810	lectin protein kinase family protein, putative, expressed
LOC_Os02g56380	OsWAK21 - OsWAK receptor-like cytoplasmic kinase OsWAK-RLCK, expressed
LOC_Os02g35010	STE_MEKK_ste11_MAP3K.9 - STE kinases include homologs to sterile 7, sterile 11 and sterile 20 from yeast, expressed
LOC_Os08g01830	TKL_IRAK_CR4L.6 - The CR4L subfamily has homology with Crinkly4, expressed
LOC_Os07g22710	CAMK_CAMK_like.32 - CAMK includes calcium/calmodulin depedent protein kinases, expressed
LOC_Os02g05480	CGMC_MAPKCMGC_2_SLT2y_ERK.1 - CGMC includes CDA, MAPK, GSK3, and CLKC kinases, expressed
LOC_Os11g44430	protein kinase, putative, expressed
LOC_Os04g54080	serine/threonine-protein kinase receptor precursor, putative, expressed
LOC_Os09g15700	receptor-like protein kinase 5 precursor, putative, expressed
LOC_Os03g62180	lectin protein kinase family protein, putative, expressed
LOC_Os03g55490	casein kinase II subunit alpha-2, putative, expressed
LOC_Os01g56330	TKL_IRAK_CrRLK1L-1.5 - The CrRLK1L-1 subfamily has homology to the CrRLK1L homolog, expressed
LOC_Os12g02200	CAMK_KIN1/SNF1/Nim1_like.6 - CAMK includes calcium/calmodulin depedent protein kinases, expressed
LOC_Os06g16070	receptor-like protein kinase 2 precursor, putative, expressed
LOC_Os01g48390	expressed protein
LOC_Os09g10720	AP2-associated protein kinase 1, putative, expressed
LOC_Os01g60440	HEAT repeat family protein, putative, expressed
LOC_Os12g29580	AGC_PVPK_like_kin82y.19 - ACG kinases include homologs to PKA, PKG and PKC, expressed
LOC_Os06g38970	expressed protein
LOC_Os03g61060	protein kinase domain containing protein, expressed
LOC_Os02g45130	protein kinase, putative, expressed
LOC_Os08g27780	OsWAK77 - OsWAK receptor-like cytoplasmic kinase OsWAK-RLCK, expressed
LOC_Os09g37790	S-locus-specific glycoprotein S13 precursor, putative, expressed
LOC_Os04g42700	receptor-like protein kinase precursor, putative, expressed
LOC_Os06g22290	legume lectins beta domain containing protein, expressed
LOC_Os11g28104	TKL_IRAK_DUF26-lf.4 - DUF26 kinases have homology to DUF26 containing loci, expressed
LOC_Os01g47840	S-locus-like receptor protein kinase, putative, expressed
LOC_Os08g34240	CAMK_KIN1/SNF1/Nim1_like.33 - CAMK includes calcium/calmodulin depedent protein kinases, expressed
LOC_Os03g58750	protein kinase domain containing protein, expressed
LOC_Os02g32610	protein kinase domain containing protein, expressed
LOC_Os11g37540	protein phosphatase 2C, putative, expressed
LOC_Os11g10640	protein kinase domain containing protein, expressed
LOC_Os05g43570	AGC_AGC_other_NDRh_TRCd.2 - ACG kinases include homologs to PKA, PKG and PKC, expressed
LOC_Os08g07774	disease resistance protein RPM1, putative, expressed
LOC_Os05g40770	leucine-rich repeat family protein, putative, expressed
LOC_Os02g56560	CK1_CaseinKinase_1.6 - CK1 includes the casein kinase 1 kinases, expressed
LOC_Os05g12680	retrotransposon protein, putative, unclassified, expressed
LOC_Os01g04460	Ser/Thr protein kinase, putative, expressed
LOC_Os04g34420	serine/threonine-protein kinase receptor precursor, putative, expressed
LOC_Os04g54190	cysteine-rich receptor-like protein kinase 8 precursor, putative, expressed
LOC_Os03g62500	CGMC_GSK.5 - CGMC includes CDA, MAPK, GSK3, and CLKC kinases, expressed
LOC_Os01g05870	receptor kinase, putative, expressed
LOC_Os06g45350	protein kinase domain containing protein, expressed
LOC_Os07g43900	protein kinase domain containing protein, expressed
LOC_Os08g12750	serine/threonine-protein kinase HT1, putative, expressed
LOC_Os02g06260	phytosulfokine receptor precursor, putative, expressed
LOC_Os07g02780	STE_MEKK_ste11_MAP3K.20 - STE kinases include homologs to sterile 7, sterile 11 and sterile 20 from yeast, expressed
LOC_Os01g42950	protein kinase family protein, putative, expressed
LOC_Os06g36310	receptor-like protein kinase 5 precursor, putative, expressed
LOC_Os11g03970	CAMK_KIN1/SNF1/Nim1_like.5 - CAMK includes calcium/calmodulin depedent protein kinases, expressed
LOC_Os04g41100	cyclin-dependent kinase G-2, putative, expressed
LOC_Os03g43590	LSTK-1-like kinase, putative, expressed
LOC_Os01g33090	expressed protein
LOC_Os12g10184	pentatricopeptide, putative, expressed
LOC_Os09g17630	receptor-like protein kinase 2, putative, expressed
LOC_Os09g39620	protein kinase family protein, putative, expressed
LOC_Os10g30530	lectin-like receptor kinase, putative, expressed
LOC_Os11g05320	AGC_PVPK_like_kin82y.1 - ACG kinases include homologs to PKA, PKG and PKC, expressed
LOC_Os01g12400	S-locus lectin protein kinase family protein, putative, expressed
LOC_Os08g13420	S-domain receptor-like protein kinase, putative, expressed
LOC_Os07g35140	receptor-like serine-threonine protein kinase, putative, expressed
LOC_Os10g12620	protein kinase domain containing protein, expressed
LOC_Os05g30870	protein kinase domain containing protein, expressed
LOC_Os02g05930	phytosulfokine receptor precursor, putative, expressed
LOC_Os03g49620	BRASSINOSTEROID INSENSITIVE 1-associated receptor kinase 1 precursor, putative, expressed
LOC_Os03g21620	AGC_AGC_other_RS6K_like.1 - ACG kinases include homologs to PKA, PKG and PKC, expressed
LOC_Os01g36080	protein phosphatase 2C containing protein, expressed
LOC_Os02g06070	phytosulfokine receptor precursor, putative, expressed
LOC_Os09g39860	protein kinase family protein, putative, expressed
LOC_Os09g37230	protein kinase family protein, putative, expressed
LOC_Os04g15660	receptor kinase, putative, expressed
LOC_Os05g16930	protein kinase domain containing protein, expressed
LOC_Os12g19290	AGC_AGC_other_NDRh_TRCd.4 - ACG kinases include homologs to PKA, PKG and PKC, expressed
LOC_Os09g31210	AGC_PVPK_like_CDK8.1 - ACG kinases include homologs to PKA, PKG and PKC, expressed
LOC_Os09g24330	TKL_IRAK_DUF26-lg.2 - DUF26 kinases have homology to DUF26 containing loci, expressed
LOC_Os03g41460	CAMK_CAMK_like.20 - CAMK includes calcium/calmodulin depedent protein kinases, expressed
LOC_Os09g20640	serine/threonine-protein kinase 16, putative, expressed
LOC_Os07g34980	TKL_IRAK_DUF26-lh.9 - DUF26 kinases have homology to DUF26 containing loci, expressed
LOC_Os01g12410	receptor-like protein kinase, putative, expressed
LOC_Os10g26520	protein kinase domain containing protein, expressed
LOC_Os04g12080	TKL_IRAK_DUF26-lc.7 - DUF26 kinases have homology to DUF26 containing loci, expressed
LOC_Os04g54140	receptor-like kinase, putative, expressed
LOC_Os12g44320	carbohydrate binding protein, putative, expressed
LOC_Os02g12400	receptor-like protein kinase precursor, putative, expressed
LOC_Os04g51950	serine/threonine-protein kinase HT1, putative, expressed
LOC_Os02g06180	phytosulfokine receptor precursor, putative, expressed
LOC_Os05g01780	STE_PAK_Ste20++TranslationKinase_Slob_Wnk.1 - STE kinases include homologs to sterile 7, sterile 11 and sterile 20 from yeast, expressed
LOC_Os03g16740	protein kinase APK1A, chloroplast precursor, putative, expressed
LOC_Os07g36570	KI domain interacting kinase 1, putative, expressed
LOC_Os09g33860	protein kinase, putative, expressed
LOC_Os05g24010	receptor protein kinase-like, putative, expressed
LOC_Os04g54110	ARK3, putative, expressed
LOC_Os09g27350	RIO1 family protein, expressed
LOC_Os02g14530	protein kinase domain containing protein, expressed
LOC_Os07g47180	transposon protein, putative, unclassified, expressed
LOC_Os12g01910	pentatricopeptide, putative, expressed
LOC_Os06g06960	S-locus-like receptor protein kinase, putative, expressed
LOC_Os04g54002	serine/threonine-protein kinase receptor precursor, putative, expressed
LOC_Os08g02990	retrotransposon protein, putative, unclassified, expressed
LOC_Os06g36320	receptor-like protein kinase 5 precursor, putative, expressed
LOC_Os03g43760	protein kinase domain containing protein, expressed
LOC_Os05g32570	RING E3 ligase protein, putative, expressed
LOC_Os06g45020	STRUBBELIG-RECEPTOR FAMILY 3 precursor, putative, expressed
LOC_Os02g12450	receptor-like protein kinase 2 precursor, putative, expressed
LOC_Os01g64970	CAMK_CAMK_like.11 - CAMK includes calcium/calmodulin depedent protein kinases, expressed
LOC_Os10g10130	OsWAK112d - OsWAK receptor-like protein kinase, expressed
LOC_Os03g14710	protein kinase, putative, expressed
LOC_Os01g57100	expressed protein
LOC_Os01g13060	CK1_CaseinKinase_1.1 - CK1 includes the casein kinase 1 kinases, expressed
LOC_Os04g52860	TKL_IRAK_CrRLK1L-1.9 - The CrRLK1L-1 subfamily has homology to the CrRLK1L homolog, expressed
LOC_Os01g20880	OsWAK3 - OsWAK receptor-like cytoplasmic kinase OsWAK-RLCK, expressed
LOC_Os11g36190	receptor kinase, putative, expressed
LOC_Os06g36270	receptor-like protein kinase 5 precursor, putative, expressed
LOC_Os12g05120	receptor kinase, putative, expressed
LOC_Os05g47770	serine/threonine-protein kinase At1g18390 precursor, putative, expressed
LOC_Os06g23190	receptor-like protein kinase 5 precursor, putative, expressed
LOC_Os02g45750	protein kinase domain containing protein, expressed
LOC_Os07g03870	receptor like protein kinase, putative, expressed
LOC_Os09g29510	OsWAK80 - OsWAK receptor-like protein kinase, expressed
LOC_Os10g29540	protein kinase domain containing protein, expressed
LOC_Os02g34600	CAMK_CAMK_like.13 - CAMK includes calcium/calmodulin depedent protein kinases, expressed
LOC_Os02g53720	phytosulfokine receptor precursor, putative, expressed
LOC_Os04g54010	serine/threonine-protein kinase receptor precursor, putative, expressed
LOC_Os09g06230	serine/threonine-protein kinase 16, putative, expressed
LOC_Os03g35600	serine/threonine-protein kinase receptor precursor, putative, expressed
LOC_Os07g03880	lectin-like receptor kinase, putative, expressed
LOC_Os01g56580	CK1_CaseinKinase_1a.3 - CK1 includes the casein kinase 1 kinases, expressed
LOC_Os11g07060	receptor protein kinase CLAVATA1 precursor, putative, expressed
LOC_Os01g12430	receptor-like protein kinase, putative, expressed
LOC_Os01g02040	retrotransposon protein, putative, unclassified, expressed
LOC_Os01g02830	receptor-like kinase ARK1AS, putative, expressed
LOC_Os11g35220	OsWAK117 - OsWAK receptor-like cytoplasmic kinase OsWAK-RLCK, expressed
LOC_Os09g37890	serine/threonine-protein kinase receptor precursor, putative, expressed
LOC_Os04g57630	phytosulfokine receptor precursor, putative, expressed
LOC_Os03g16010	BRASSINOSTEROID INSENSITIVE 1-associated receptor kinase 1 precursor, putative, expressed
LOC_Os04g23720	lectin protein kinase family protein, putative, expressed
LOC_Os04g23600	D-mannose binding lectin family protein, expressed
LOC_Os03g18430	protein kinase, putative, expressed
LOC_Os09g25090	CAMK_KIN1/SNF1/Nim1_like.34 - CAMK includes calcium/calmodulin depedent protein kinases, expressed
LOC_Os12g44330	serine/threonine-protein kinase PRP4, putative, expressed
LOC_Os08g39210	OsWAK74 - OsWAK receptor-like protein kinase, expressed
LOC_Os08g37800	CAMK_KIN1/SNF1/Nim1_like_AMPKh.4 - CAMK includes calcium/calmodulin depedent protein kinases, expressed
LOC_Os02g39090	expressed protein
LOC_Os03g04050	protein kinase family protein, putative, expressed
LOC_Os03g06410	protein kinase domain containing protein, expressed
LOC_Os01g26210	OsWAK6 - OsWAK receptor-like protein kinase, expressed
LOC_Os09g37800	serine/threonine kinase, putative, expressed
LOC_Os03g50330	CAMK_KIN1/SNF1/Nim1_like.18 - CAMK includes calcium/calmodulin depedent protein kinases, expressed
LOC_Os05g39870	CAMK_KIN1/SNF1/Nim1_like.24 - CAMK includes calcium/calmodulin depedent protein kinases, expressed
LOC_Os04g58250	protein kinase, putative, expressed
LOC_Os03g57940	CK1_CaseinKinase_1a.4 - CK1 includes the casein kinase 1 kinases, expressed
LOC_Os02g48210	lectin-like protein kinase, putative, expressed
LOC_Os06g27890	STE_MEK_ste7_MAP2K.8 - STE kinases include homologs to sterile 7, sterile 11 and sterile 20 from yeast, expressed
LOC_Os04g53990	ethylene-responsive protein related, putative, expressed
LOC_Os07g49240	MRH1, putative, expressed
LOC_Os04g44900	lectin-like receptor kinase, putative, expressed
LOC_Os12g34320	S-locus-like receptor protein kinase, putative, expressed
LOC_Os06g50340	receptor protein kinase CLAVATA1 precursor, putative, expressed
LOC_Os02g54510	protein kinase domain containing protein, expressed
LOC_Os06g40030	S-locus-like receptor protein kinase, putative, expressed
LOC_Os07g35580	TKL_IRAK_DUF26-lc.20 - DUF26 kinases have homology to DUF26 containing loci, expressed
LOC_Os11g08950	protein kinase family protein, putative, expressed
LOC_Os05g25840	ELMO/CED-12 family protein, putative, expressed
LOC_Os01g04570	Ser/Thr protein kinase, putative, expressed
LOC_Os01g62080	serine/threonine-protein kinase AFC1, putative, expressed
LOC_Os05g01040	serine/threonine-protein kinase, putative, expressed
LOC_Os04g47240	STE_MEKK_ste11_MAP3K.17 - STE kinases include homologs to sterile 7, sterile 11 and sterile 20 from yeast, expressed
LOC_Os02g12030	receptor-like protein kinase precursor, putative, expressed
LOC_Os11g25860	protein Kinase, putative, expressed
LOC_Os11g39370	BRASSINOSTEROID INSENSITIVE 1-associated receptor kinase 1 precursor, putative, expressed
LOC_Os01g10150	CK1_CaseinKinase_1a.1 - CK1 includes the casein kinase 1 kinases, expressed
LOC_Os11g46980	receptor-like protein kinase 2 precursor, putative, expressed
LOC_Os02g44642	STE_MEKK_ste11_MAP3K.10 - STE kinases include homologs to sterile 7, sterile 11 and sterile 20 from yeast, expressed
LOC_Os04g59330	expressed protein
LOC_Os01g27020	transposon protein, putative, unclassified, expressed
LOC_Os01g59580	retrotransposon protein, putative, unclassified, expressed
LOC_Os01g01740	protein kinase domain containing protein, expressed
LOC_Os11g47180	receptor-like protein kinase 2 precursor, putative, expressed
LOC_Os01g10840	CGMC_GSK.2 - CGMC includes CDA, MAPK, GSK3, and CLKC kinases, expressed
LOC_Os04g23760	lectin protein kinase family protein, putative, expressed
LOC_Os02g05920	phytosulfokine receptor precursor, putative, expressed
LOC_Os06g06930	receptor-like protein kinase, putative, expressed
LOC_Os01g48020	S-locus-like receptor protein kinase, putative, expressed
LOC_Os04g29960	OsWAK43 - OsWAK receptor-like protein kinase, expressed
LOC_Os06g27720	retrotransposon protein, putative, unclassified, expressed
LOC_Os02g10100	leucine-rich repeat receptor protein kinase EXS precursor, putative, expressed
LOC_Os01g65940	expressed protein
LOC_Os01g32660	STE_MEK_ste7_MAP2K.2 - STE kinases include homologs to sterile 7, sterile 11 and sterile 20 from yeast, expressed
LOC_Os04g15630	xa21, putative, expressed
LOC_Os09g08420	AGC_PVPK_like_kin82y.15 - ACG kinases include homologs to PKA, PKG and PKC, expressed
LOC_Os07g25680	protein kinase domain containing protein, expressed
LOC_Os04g52614	SHR5-receptor-like kinase, putative, expressed
LOC_Os02g50970	protein kinase domain containing protein, expressed
LOC_Os03g02680	cyclin-dependent kinase A-1, putative, expressed
LOC_Os12g31470	retrotransposon protein, putative, unclassified, expressed
LOC_Os03g15250	lectin-like receptor kinase, putative, expressed
LOC_Os01g44110	serine/threonine-protein kinase, putative, expressed
LOC_Os03g01850	cyclin-dependent kinase A-1, putative, expressed
LOC_Os03g03880	protein kinase, putative, expressed
LOC_Os06g49170	OsWAK64 - OsWAK receptor-like protein kinase, expressed
LOC_Os03g50390	AGC_AGC_other_GWLd.2 - ACG kinases include homologs to PKA, PKG and PKC, expressed
LOC_Os07g35540	TKL_IRAK_DUF26-lc.19 - DUF26 kinases have homology to DUF26 containing loci, expressed
LOC_Os01g05640	receptor-like protein kinase 5 precursor, putative, expressed
LOC_Os02g13510	receptor-like protein kinase 5 precursor, putative, expressed
LOC_Os01g47530	CGMC_MAPKCMGC_2.6 - CGMC includes CDA, MAPK, GSK3, and CLKC kinases, expressed
LOC_Os11g14050	leucine-rich repeat family protein, putative, expressed
LOC_Os04g43490	CK1_CaseinKinase_1.7 - CK1 includes the casein kinase 1 kinases, expressed
LOC_Os10g35040	receptor kinase like protein, putative, expressed
LOC_Os02g12040	receptor-like protein kinase precursor, putative, expressed
LOC_Os10g42110	protein kinase family protein, putative, expressed
LOC_Os06g05070	protein kinase domain containing protein, expressed
LOC_Os06g38780	receptor-like protein kinase 2 precursor, putative, expressed
LOC_Os03g16130	CAMK_CAMK_like_ULKh_APGy.2 - CAMK includes calcium/calmodulin depedent protein kinases, expressed
LOC_Os10g29620	tyrosine protein kinase domain containing protein, putative, expressed
LOC_Os05g16740	SHR5-receptor-like kinase, putative, expressed
LOC_Os03g03570	leucine-rich repeat transmembrane protein kinase, putative, expressed
LOC_Os11g17080	OsMPK15 - Putative MAPK based on amino acid sequence homology, expressed
LOC_Os11g36150	receptor-like protein kinase 2 precursor, putative, expressed
LOC_Os09g36190	glycosyl transferase family 8, putative, expressed
LOC_Os01g01410	TKL_IRAK_C-LEC.1 - TKL_IRAK_C-LEC has homology to C-type lectin receptors, expressed
LOC_Os12g07230	CAMK_CAMK_like.45 - CAMK includes calcium/calmodulin depedent protein kinases, expressed
LOC_Os04g24300	OsWAK35a - OsWAK short gene, expressed
LOC_Os10g21890	glycosyl transferase family 8, putative, expressed
LOC_Os10g30540	lectin-like receptor kinase, putative, expressed
LOC_Os06g47820	protein kinase domain containing protein, expressed
LOC_Os06g43840	protein kinase domain containing protein, expressed
LOC_Os06g47760	phytosulfokine receptor precursor, putative, expressed
LOC_Os01g19150	CGMC_GSK.3 - CGMC includes CDA, MAPK, GSK3, and CLKC kinases, expressed
LOC_Os01g40499	S-locus lectin protein kinase family protein, putative, expressed
LOC_Os03g59390	CAMK_CAMK_like.24 - CAMK includes calcium/calmodulin depedent protein kinases, expressed
LOC_Os05g34950	cysteine-rich receptor-like protein kinase 6 precursor, putative, expressed
LOC_Os04g23700	lectin protein kinase family protein, putative, expressed
LOC_Os01g26174	OsWAK5 - OsWAK receptor-like protein kinase, expressed
LOC_Os03g54780	STE_PAK_Ste20_KHSh_GCKh_HPKh.1 - STE kinases include homologs to sterile 7, sterile 11 and sterile 20 from yeast, expressed
LOC_Os07g35260	TKL_IRAK_DUF26-lc.9 - DUF26 kinases have homology to DUF26 containing loci, expressed
LOC_Os08g14990	receptor-like protein kinase 2 precursor, putative, expressed
LOC_Os07g35680	TKL_IRAK_DUF26-lc22 - DUF26 kinases have homology to DUF26 containing loci, expressed
LOC_Os04g23620	D-mannose binding lectin family protein, expressed
LOC_Os05g32600	cyclin-dependent kinase D-1, putative, expressed
LOC_Os07g35004	TKL_IRAK_DUF26-la.4 - DUF26 kinases have homology to DUF26 containing loci, expressed
LOC_Os12g42040	OsWAK126 - OsWAK receptor-like protein kinase, expressed
LOC_Os01g20900	OsWAK4 - OsWAK receptor-like cytoplasmic kinase OsWAK-RLCK, expressed
LOC_Os06g07230	tyrosine protein kinase domain containing protein, putative, expressed
LOC_Os10g40060	protein kinase, putative, expressed
LOC_Os07g35810	TKL_IRAK_DUF26-ld.6 - DUF26 kinases have homology to DUF26 containing loci, expressed
LOC_Os01g47470	serine/threonine-protein kinase, putative, expressed
LOC_Os06g22820	cyclin-dependent kinase F-1, putative, expressed
LOC_Os07g03830	lectin-like receptor kinase, putative, expressed
LOC_Os02g14120	BRASSINOSTEROID INSENSITIVE 1-associated receptor kinase 1 precursor, putative, expressed
LOC_Os07g36780	S-domain receptor-like protein kinase, putative, expressed
LOC_Os08g10310	SHR5-receptor-like kinase, putative, expressed
LOC_Os03g08170	protein kinase APK1B, chloroplast precursor, putative, expressed
LOC_Os01g54100	CK1_CaseinKinase_1a.2 - CK1 includes the casein kinase 1 kinases, expressed
LOC_Os03g13080	LYK, putative, expressed
LOC_Os02g09960	LYK8, putative, expressed
LOC_Os03g50230	protein kinase, putative, expressed
LOC_Os04g12540	receptor-like protein kinase, putative, expressed
LOC_Os06g50030	CAMK_CAMK_like.30 - CAMK includes calcium/calmodulin depedent protein kinases, expressed
LOC_Os01g02770	resistance-related receptor-like kinase, putative, expressed
LOC_Os02g07790	serine/threonine-protein kinase HT1, putative, expressed
LOC_Os05g25350	TKL_IRAK_CrRLK1L-1.12 - The CrRLK1L-1 subfamily has homology to the CrRLK1L homolog, expressed
LOC_Os03g54900	phytosulfokine receptor precursor, putative, expressed
LOC_Os02g43740	AGC_PVPK_like_kin82y.6 - ACG kinases include homologs to PKA, PKG and PKC, expressed
LOC_Os07g31130	OsWAK72 - OsWAK receptor-like cytoplasmic kinase OsWAK-RLCK, expressed
LOC_Os07g38070	protein kinase, putative, expressed
LOC_Os01g33950	expressed protein
LOC_Os01g09200	AGC_AGC_other_NDRh_TRCd.1 - ACG kinases include homologs to PKA, PKG and PKC, expressed
LOC_Os12g41180	LSTK-1-like kinase, putative, expressed
LOC_Os03g22700	cyclin-dependent kinase C-2, putative, expressed
LOC_Os05g03920	TKL_IRAK_DUF26-lf.3 - DUF26 kinases have homology to DUF26 containing loci, expressed
LOC_Os12g42520	receptor kinase, putative, expressed
LOC_Os01g51200	CK1_CaseinKinase_1.3 - CK1 includes the casein kinase 1 kinases, expressed
LOC_Os05g40270	expressed protein
LOC_Os01g57480	serine/threonine-protein kinase receptor precursor, putative, expressed
LOC_Os09g36180	glycosyl transferase family 8 protein, expressed
LOC_Os03g53720	SRPK4, putative, expressed
LOC_Os03g05470	tyrosine protein kinase domain containing protein, putative, expressed
LOC_Os07g07560	CK1_CaseinKinase_1a.6 - CK1 includes the casein kinase 1 kinases, expressed
LOC_Os08g34650	receptor-like protein kinase precursor, putative, expressed
LOC_Os11g07250	receptor kinase, putative, expressed
LOC_Os01g04490	Ser/Thr protein kinase, putative, expressed
LOC_Os07g47270	protein kinase APK1B, chloroplast precursor, putative, expressed
LOC_Os01g02400	protein kinase domain containing protein, expressed
LOC_Os02g13970	Complex I intermediate-associated protein 30 domain containing protein, putative, expressed
LOC_Os01g02760	receptor-like kinase, putative, expressed
LOC_Os09g37834	serine/threonine-protein kinase receptor precursor, putative, expressed
LOC_Os01g02420	protein kinase domain containing protein, expressed
LOC_Os11g45280	protein kinase family protein, putative, expressed
LOC_Os01g04520	Ser/Thr protein kinase, putative, expressed
LOC_Os05g51560	CK1_CaseinKinase_1.8 - CK1 includes the casein kinase 1 kinases, expressed
LOC_Os11g07040	CAMK_CAMK_like.43 - CAMK includes calcium/calmodulin depedent protein kinases, expressed
LOC_Os10g01060	protein kinase family protein, putative, expressed
LOC_Os08g42580	protein kinase domain containing protein, expressed
LOC_Os01g04450	OsWAK2 - OsWAK receptor-like cytoplasmic kinase OsWAK-RLCK, expressed
LOC_Os02g06120	Leucine Rich Repeat family protein, expressed
LOC_Os01g38950	CK1_CaseinKinase_1.2 - CK1 includes the casein kinase 1 kinases, expressed
LOC_Os06g51170	serine/threonine-protein kinase Cx32, chloroplast precursor, putative, expressed
LOC_Os10g25090	STRUBBELIG-RECEPTOR FAMILY 6 precursor, putative, expressed
LOC_Os02g42370	receptor-like protein kinase 2 precursor, putative, expressed
LOC_Os01g21960	serine/threonine-protein kinase, putative, expressed
LOC_Os01g22390	WD domain containing protein, putative, expressed
LOC_Os02g56565	endoribonuclease, putative, expressed
LOC_Os06g06760	protein kinase, putative, expressed
LOC_Os01g47820	S-locus-like receptor protein kinase, putative, expressed
LOC_Os06g41980	LYK8, putative, expressed
LOC_Os01g65030	S-locus-specific glycoprotein precursor, putative, expressed
LOC_Os06g37690	S-locus-like receptor protein kinase, putative, expressed
LOC_Os10g41220	protein kinase family protein, putative, expressed
LOC_Os01g49580	Protein kinase domain containing protein, expressed
LOC_Os06g45300	serine/threonine-protein kinase HT1, putative, expressed
LOC_Os02g14130	CGMC_GSK.4 - CGMC includes CDA, MAPK, GSK3, and CLKC kinases, expressed
LOC_Os04g47280	ATFUC1, putative, expressed
LOC_Os10g06510	cyclin-dependent kinase G-1, putative, expressed
LOC_Os04g33500	protein kinase, putative, expressed
LOC_Os08g02050	protein kinase family protein, putative, expressed
LOC_Os02g11980	receptor-like protein kinase precursor, putative, expressed
LOC_Os02g06190	phytosulfokine receptor precursor, putative, expressed
LOC_Os12g02250	STE_PAK_Ste20_Slob_Wnk.3 - STE kinases include homologs to sterile 7, sterile 11 and sterile 20 from yeast, expressed
LOC_Os05g39410	expressed protein
LOC_Os07g42770	CAMK_CAMK_like.35 - CAMK includes calcium/calmodulin depedent protein kinases, expressed
LOC_Os01g66020	protein kinase family protein, putative, expressed
LOC_Os09g18594	protein kinase domain containing protein, expressed
LOC_Os08g07760	BRASSINOSTEROID INSENSITIVE 1-associated receptor kinase 1 precursor, putative, expressed
LOC_Os04g34330	serine/threonine-protein kinase receptor precursor, putative, expressed
LOC_Os07g31250	OsWAK69 - OsWAK receptor-like cytoplasmic kinase OsWAK-RLCK, expressed
LOC_Os05g15720	expressed protein
LOC_Os09g25540	receptor-like protein kinase 2 precursor, putative, expressed
LOC_Os06g35850	lectin protein kinase family protein, putative, expressed
LOC_Os06g47470	TKL_IRAK_DUF26-lh.2 - DUF26 kinases have homology to DUF26 containing loci, expressed
LOC_Os01g59570	senescence-induced receptor-like serine/threonine-protein kinase precursor, putative, expressed
LOC_Os07g43560	TKL_IRAK_DUF26-lc.24 - DUF26 kinases have homology to DUF26 containing loci, expressed
LOC_Os10g39010	TKL_IRAK_CrRLK1L-1.16 - The CrRLK1L-1 subfamily has homology to the CrRLK1L homolog, expressed
LOC_Os09g27010	tyrosine protein kinase domain containing protein, putative, expressed
LOC_Os01g04480	expressed protein
LOC_Os03g53250	expressed protein
LOC_Os04g52600	SHR5-receptor-like kinase, putative, expressed
LOC_Os02g05910	phytosulfokine receptor precursor, putative, expressed
LOC_Os03g25070	CAMK_CAMK_like.18 - CAMK includes calcium/calmodulin depedent protein kinases, expressed
LOC_Os11g14420	inactive receptor kinase At1g27190 precursor, putative, expressed
LOC_Os06g05830	protein kinase domain containing protein, expressed
LOC_Os10g30600	tyrosine protein kinase domain containing protein, putative, expressed
LOC_Os04g34270	serine/threonine-protein kinase receptor precursor, putative, expressed
LOC_Os01g72790	cyclin-dependent kinase, putative, expressed
LOC_Os09g19700	protein kinase domain containing protein, expressed
LOC_Os11g01740	serine/threonine-protein kinase, putative, expressed
LOC_Os06g38760	retrotransposon protein, putative, unclassified, expressed
LOC_Os06g35160	CAMK_KIN1/SNF1/Nim1_like.26 - CAMK includes calcium/calmodulin depedent protein kinases, expressed
LOC_Os07g03990	leucine-rich repeat family protein, putative, expressed
LOC_Os01g02290	Ser/Thr receptor-like kinase, putative, expressed
LOC_Os01g41870	protein kinase, putative, expressed
LOC_Os01g02300	receptor kinase ORK10, putative, expressed
LOC_Os01g02390	protein kinase domain containing protein, expressed
LOC_Os01g13800	receptor-like protein kinase 5 precursor, putative, expressed
LOC_Os03g01160	protein kinase family protein, putative, expressed
LOC_Os01g61620	protein kinase family protein, putative, expressed
LOC_Os03g40400	interferon-induced, double-stranded RNA-activated protein kinase, putative, expressed
LOC_Os06g47650	phytosulfokine receptor precursor, putative, expressed
LOC_Os12g01740	serine/threonine-protein kinase, putative, expressed
LOC_Os09g28180	D-mannose binding lectin family protein, expressed
LOC_Os07g35310	TKL_IRAK_DUF26-lc.12 - DUF26 kinases have homology to DUF26 containing loci, expressed
LOC_Os03g03280	TKL_IRAK_CrRLK1L-1.6 - The CrRLK1L-1 subfamily has homology to the CrRLK1L homolog, expressed
LOC_Os03g12680	protein kinase, putative, expressed
LOC_Os05g45420	CAMK_KIN1/SNF1/Nim1_like_AMPKh.3 - CAMK includes calcium/calmodulin depedent protein kinases, expressed
LOC_Os10g28640	RIO1 family protein, expressed
LOC_Os06g38470	histone deacetylase 19, putative, expressed
LOC_Os11g02300	CPuORF36 - conserved peptide uORF-containing transcript, expressed
LOC_Os12g42070	OsWAK129b - OsWAK receptor-like protein kinase, expressed
LOC_Os07g40550	IBS1, putative, expressed
LOC_Os03g62430	OsWAK28 - OsWAK receptor-like protein kinase, expressed
LOC_Os06g43270	protein kinase domain containing protein, expressed
LOC_Os04g38480	BRASSINOSTEROID INSENSITIVE 1-associated receptor kinase 1 precursor, putative, expressed
LOC_Os10g38950	CGMC_MAPKCMGC_2_ERK.14 - CGMC includes CDA, MAPK, GSK3, and CLKC kinases, expressed
LOC_Os01g66630	S-domain receptor-like protein kinase, putative, expressed
LOC_Os02g05950	phytosulfokine receptor precursor, putative, expressed
LOC_Os06g35530	CGMC_GSK.8 - CGMC includes CDA, MAPK, GSK3, and CLKC kinases, expressed
LOC_Os03g53880	serine/threonine-protein kinase TOUSLED, putative, expressed
LOC_Os02g43430	protein kinase domain containing protein, expressed
LOC_Os04g51030	wall-associated kinase 1, putative, expressed
LOC_Os07g12480	receptor protein kinase, putative, expressed
LOC_Os06g38930	leucine-rich repeat receptor protein kinase EXS precursor, putative, expressed
LOC_Os07g04220	wound and phytochrome signaling involved receptor like kinase, putative, expressed
LOC_Os03g44140	OsWAK26 - OsWAK receptor-like protein kinase, expressed
LOC_Os03g30890	S-locus-like receptor protein kinase, putative, expressed
LOC_Os05g50190	protein kinase domain containing protein, expressed
LOC_Os10g40100	protein kinase, putative, expressed
LOC_Os01g12290	S-locus lectin protein kinase family protein, putative, expressed
LOC_Os11g07260	expressed protein
LOC_Os10g20160	serine/threonine-protein kinase receptor precursor, putative, expressed
LOC_Os08g07890	NB-ARC domain containing protein, expressed
LOC_Os01g60910	CAMK_KIN1/SNF1/Nim1_like.12 - CAMK includes calcium/calmodulin depedent protein kinases, expressed
LOC_Os01g43410	CAMK_CAMK_like.9 - CAMK includes calcium/calmodulin depedent protein kinases, expressed
LOC_Os01g61590	CAMK_CAMK_like.1 - CAMK includes calcium/calmodulin depedent protein kinases, expressed
LOC_Os01g55450	CAMK_KIN1/SNF1/Nim1_like.11 - CAMK includes calcium/calmodulin depedent protein kinases, expressed
LOC_Os03g50450	inactive receptor kinase At2g26730 precursor, putative, expressed
LOC_Os05g17604	SHR5-receptor-like kinase, putative, expressed
LOC_Os05g26940	CAMK_KIN1/SNF1/Nim1_like.23 - CAMK includes calcium/calmodulin depedent protein kinases, expressed
LOC_Os04g52590	protein kinase domain containing protein, expressed
LOC_Os09g37949	serine/threonine-protein kinase SRPK1, putative, expressed
LOC_Os10g22860	receptor kinase, putative, expressed
LOC_Os08g17320	protein kinase family protein, putative, expressed
LOC_Os02g11930	receptor-like protein kinase precursor, putative, expressed
LOC_Os04g39910	receptor-like protein kinase, putative, expressed
LOC_Os05g32360	cyclin-dependent kinase C-1, putative, expressed
LOC_Os02g57080	serine/threonine-protein kinase, putative, expressed
LOC_Os04g01320	serine/threonine-protein kinase receptor precursor, putative, expressed
LOC_Os08g40280	lectin-like protein kinase, putative, expressed
LOC_Os10g02250	OsWAK95 - OsWAK receptor-like protein kinase, expressed
LOC_Os01g52050	systemin receptor SR160 precursor, putative, expressed
LOC_Os01g42294	inactive receptor kinase At2g26730 precursor, putative, expressed
LOC_Os02g06030	phytosulfokine receptor precursor, putative, expressed
LOC_Os11g40430	wall-associated receptor kinase-like 2 precursor, putative, expressed
LOC_Os11g07230	receptor kinase, putative, expressed
LOC_Os06g04880	serine threonine kinase, putative, expressed
LOC_Os01g02600	Ser/Thr receptor-like kinase, putative, expressed
LOC_Os02g12910	receptor-like protein kinase 5 precursor, putative, expressed
LOC_Os01g04409	OsWAK1 - OsWAK receptor-like cytoplasmic kinase OsWAK-RLCK, expressed
LOC_Os04g43020	protein kinase, putative, expressed
LOC_Os01g57490	D-mannose binding lectin family protein, expressed
LOC_Os01g07940	AGC_PVPK_like_kin82y.3 - ACG kinases include homologs to PKA, PKG and PKC, expressed
LOC_Os03g62340	protein kinase family protein, putative, expressed
LOC_Os05g11730	CGMC_GSK.7 - CGMC includes CDA, MAPK, GSK3, and CLKC kinases, expressed
LOC_Os04g12560	receptor-like protein kinase, putative, expressed
LOC_Os01g72990	expressed protein
LOC_Os04g58910	receptor protein kinase TMK1 precursor, putative, expressed
LOC_Os01g63280	tyrosine protein kinase domain containing protein, putative, expressed
LOC_Os02g47410	protein kinase, putative, expressed
LOC_Os01g02320	protein kinase domain containing protein, expressed
LOC_Os12g07800	S-locus-like receptor protein kinase, putative, expressed
LOC_Os01g02690	resistance-related receptor-like kinase, putative, expressed
LOC_Os12g03970	CAMK_CAMK_like.44 - CAMK includes calcium/calmodulin depedent protein kinases, expressed
LOC_Os02g01800	receptor-like protein kinase precursor, putative, expressed
LOC_Os06g47720	serine/threonine-protein kinase BRI1-like 2 precursor, putative, expressed
LOC_Os02g40860	CK1_CaseinKinase_1.5 - CK1 includes the casein kinase 1 kinases, expressed
LOC_Os12g41510	cysteine-rich receptor-like protein kinase 31 precursor, putative, expressed
LOC_Os10g22890	receptor-like kinase, putative, expressed
LOC_Os01g49614	Protein kinase domain containing protein, expressed
LOC_Os08g24310	receptor-like protein kinase precursor, putative, expressed
LOC_Os05g26820	CAMK_KIN1/SNF1/Nim1_like.20 - CAMK includes calcium/calmodulin depedent protein kinases, expressed
LOC_Os10g06580	cyclin-dependent kinase G-1, putative, expressed
LOC_Os01g49920	protein kinase, putative, expressed
LOC_Os05g51070	inactive receptor kinase At2g26730 precursor, putative, expressed
LOC_Os02g55340	WD domain and HEAT domain containing protein, putative, expressed
LOC_Os01g45520	D-mannose binding lectin family protein, expressed
LOC_Os11g01860	pentatricopeptide, putative, expressed
LOC_Os10g32990	receptor-like protein kinase 2 precursor, putative, expressed
LOC_Os06g50920	protein kinase family protein, putative, expressed
LOC_Os02g41480	OsWAK12 - OsWAK receptor-like cytoplasmic kinase OsWAK-RLCK, expressed
LOC_Os05g03450	lectin protein kinase family protein, putative, expressed
LOC_Os03g51020	expressed protein
LOC_Os06g38730	receptor-like protein kinase precursor, putative, expressed
LOC_Os02g26160	receptor lectin kinase like protein, putative, expressed
LOC_Os09g02250	transposon protein, putative, unclassified, expressed
LOC_Os01g06280	TKL_IRAK_CrRLK1L-1.4 - The CrRLK1L-1 subfamily has homology to the CrRLK1L homolog, expressed
LOC_Os07g38800	lectin-like receptor kinase, putative, expressed
LOC_Os04g56110	protein kinase, putative, expressed
LOC_Os04g35080	protein kinase domain containing protein, expressed
LOC_Os06g43170	transposon protein, putative, unclassified, expressed
LOC_Os09g19140	senescence-induced receptor-like serine/threonine-protein kinase precursor, putative, expressed
LOC_Os06g16330	BRASSINOSTEROID INSENSITIVE 1-associated receptor kinase 1 precursor, putative, expressed
LOC_Os05g40200	inactive receptor kinase At2g26730 precursor, putative, expressed
LOC_Os06g06940	S-locus-like receptor protein kinase, putative, expressed
LOC_Os09g29520	OsWAK81 - OsWAK receptor-like cytoplasmic kinase OsWAK-RLCK, expressed
LOC_Os12g08180	receptor-like protein kinase 2 precursor, putative, expressed
LOC_Os10g39420	CAMK_CAMK_like.8 - CAMK includes calcium/calmodulin depedent protein kinases, expressed
LOC_Os02g01730	serine/threonine-protein kinase At1g18390 precursor, putative, expressed
LOC_Os02g34750	leucine-rich repeat receptor-like protein kinase 1, putative, expressed
LOC_Os11g06140	serine/threonine-protein kinase WNK4, putative, expressed
LOC_Os11g26130	receptor protein kinase TMK1 precursor, putative, expressed
LOC_Os04g51370	protein kinase, putative, expressed
LOC_Os11g06780	serine/threonine-protein kinase BRI1-like 1 precursor, putative, expressed
LOC_Os04g52640	SHR5-receptor-like kinase, putative, expressed
LOC_Os02g09740	STRUBBELIG-RECEPTOR FAMILY 7 precursor, putative, expressed
LOC_Os08g34380	receptor-like kinase, putative, expressed
LOC_Os08g17410	BRASSINOSTEROID INSENSITIVE 1 precursor, putative, expressed
LOC_Os08g34640	receptor-like protein kinase precursor, putative, expressed
LOC_Os04g41030	inactive receptor kinase At1g27190 precursor, putative, expressed
LOC_Os03g14840	AGC_PVPK_like_kin82y.8 - ACG kinases include homologs to PKA, PKG and PKC, expressed
LOC_Os03g17980	CAMK_KIN1/SNF1/Nim1_like_AMPKh.2 - CAMK includes calcium/calmodulin depedent protein kinases, expressed
LOC_Os07g37810	STRUBBELIG-RECEPTOR FAMILY 1 precursor, putative, expressed
LOC_Os08g07930	resistance protein, putative, expressed
LOC_Os09g07730	expressed protein
LOC_Os02g57700	protein kinase, putative, expressed
LOC_Os03g12470	OsWAK25 - OsWAK receptor-like protein kinase, expressed
LOC_Os08g10320	SHR5-receptor-like kinase, putative, expressed
LOC_Os07g02350	casein kinase II subunit alpha-2, putative, expressed
LOC_Os02g12670	protein kinase family protein, putative, expressed
LOC_Os10g06740	receptor-like protein kinase precursor, putative, expressed
LOC_Os05g39080	protein kinase family protein, putative, expressed
LOC_Os11g03820	D-mannose binding lectin family protein, expressed
LOC_Os05g51740	receptor protein kinase CLAVATA1 precursor, putative, expressed
LOC_Os07g05620	CAMK_KIN1/SNF1/Nim1_like.28 - CAMK includes calcium/calmodulin depedent protein kinases, expressed
LOC_Os03g50810	receptor protein kinase TMK1 precursor, putative, expressed
LOC_Os07g07230	protein kinase, putative, expressed
LOC_Os03g15570	STE_MEKK_ste11_MAP3K.12 - STE kinases include homologs to sterile 7, sterile 11 and sterile 20 from yeast, expressed
LOC_Os02g05980	phytosulfokine receptor precursor, putative, expressed
LOC_Os11g02305	expressed protein
LOC_Os04g53998	kinase, putative, expressed
LOC_Os11g07100	receptor-like protein kinase precursor, putative, expressed
LOC_Os08g02040	expressed protein
LOC_Os07g42200	tyrosine protein kinase domain containing protein, putative, expressed
LOC_Os05g40050	receptor-like protein kinase 2 precursor, putative, expressed
LOC_Os03g20380	CAMK_KIN1/SNF1/Nim1_like.2 - CAMK includes calcium/calmodulin depedent protein kinases, expressed
LOC_Os01g54480	serine/threonine protein kinase, putative, expressed
LOC_Os09g20880	serine/threonine-protein kinase, putative, expressed
LOC_Os02g18430	AGC_PVPK_like_kin82y.5 - ACG kinases include homologs to PKA, PKG and PKC, expressed
LOC_Os08g39590	inactive receptor kinase At2g26730 precursor, putative, expressed
LOC_Os01g02350	receptor-like kinase ARK1AS, putative, expressed
LOC_Os12g37980	protein kinase domain containing protein, expressed
LOC_Os07g42626	STRUBBELIG-RECEPTOR FAMILY 6 precursor, putative, expressed
LOC_Os04g59320	protein kinase domain containing protein, expressed
LOC_Os11g07120	receptor kinase-like protein, identical, putative, expressed
LOC_Os01g51400	Leucine Rich Repeat family protein, expressed
LOC_Os06g10230	receptor-like protein kinase 5 precursor, putative, expressed
LOC_Os01g74550	transposon protein, putative, unclassified, expressed
LOC_Os06g38670	receptor-like protein kinase precursor, putative, expressed
LOC_Os12g42060	OsWAK128b - OsWAK receptor-like protein kinase, expressed
LOC_Os02g41890	phytosulfokine receptor precursor, putative, expressed
LOC_Os01g49529	OsWAK10d - OsWAK receptor-like cytoplasmic kinase OsWAK-RLCK, expressed
LOC_Os04g24220	OsWAK32 - OsWAK receptor-like protein kinase, expressed
LOC_Os02g05960	phytosulfokine receptor precursor, putative, expressed
LOC_Os03g12250	atypical receptor-like kinase MARK, putative, expressed
LOC_Os06g49810	glycosyl transferase family 8, putative, expressed
LOC_Os06g14260	lectin-like receptor kinase, putative, expressed
LOC_Os03g43670	TKL_IRAK_CR4L.1 - The CR4L subfamily has homology with Crinkly4, expressed
LOC_Os04g35240	CAMK_CAMK_like.25 - CAMK includes calcium/calmodulin depedent protein kinases, expressed
LOC_Os12g08050	nodulation receptor kinase precursor, putative, expressed
LOC_Os01g72700	expressed protein
LOC_Os08g13870	S-locus lectin protein kinase family protein, putative, expressed
LOC_Os01g14860	CGMC_GSK.1 - CGMC includes CDA, MAPK, GSK3, and CLKC kinases, expressed
LOC_Os09g16540	protein kinase, putative, expressed
LOC_Os07g35330	TKL_IRAK_DUF26-lc.13 - DUF26 kinases have homology to DUF26 containing loci, expressed
LOC_Os04g44910	receptor like protein kinase, putative, expressed
LOC_Os01g53840	protein kinase family protein, putative, expressed
LOC_Os07g43350	expressed protein
LOC_Os11g46970	receptor-like protein kinase 5 precursor, putative, expressed
LOC_Os06g18830	AGC_PVPK_like_kin82y.13 - ACG kinases include homologs to PKA, PKG and PKC, expressed
LOC_Os07g38810	lectin receptor-type protein kinase, putative, expressed
LOC_Os01g02570	protein kinase domain containing protein, expressed
LOC_Os03g12150	serine/threonine-protein kinase receptor precursor, putative, expressed
LOC_Os07g35660	TKL_IRAK_DUF26-lc.21 - DUF26 kinases have homology to DUF26 containing loci, expressed
LOC_Os08g39174	retrotransposon protein, putative, Ty1-copia subclass, expressed
LOC_Os09g21520	DEAD-box ATP-dependent RNA helicase, putative, expressed
LOC_Os05g34270	inactive receptor kinase At1g27190 precursor, putative, expressed
LOC_Os09g38910	OsWAK92 - OsWAK receptor-like protein kinase, expressed
LOC_Os02g05940	phytosulfokine receptor precursor, putative, expressed
LOC_Os08g18920	protein kinase domain containing protein, expressed
LOC_Os06g17285	protein kinase, putative, expressed
LOC_Os08g23290	serine/threonine-protein kinase BRI1-like 2 precursor, putative, expressed
LOC_Os03g08550	STRUBBELIG-RECEPTOR FAMILY 6 precursor, putative, expressed
LOC_Os05g39090	CAMK_CAMK_like.29 - CAMK includes calcium/calmodulin depedent protein kinases, expressed
LOC_Os01g09860	retrotransposon protein, putative, unclassified, expressed
LOC_Os10g35450	serine/threonine-protein kinase, putative, expressed
LOC_Os03g51440	LRR receptor-like protein kinase, putative, expressed
LOC_Os11g11890	protein kinase domain containing protein, expressed
LOC_Os03g17550	serine/threonine-protein kinase, putative, expressed
LOC_Os02g40180	receptor-like protein kinase 5 precursor, putative, expressed
LOC_Os09g16950	cysteine-rich receptor-like protein kinase 25 precursor, putative, expressed
LOC_Os10g19160	receptor kinase, putative, expressed
LOC_Os04g39650	receptor protein kinase CLAVATA1 precursor, putative, expressed
LOC_Os11g29790	receptor kinase, putative, expressed
LOC_Os06g08280	protein kinase domain containing protein, expressed
LOC_Os05g44960	expressed protein
LOC_Os06g04370	expressed protein
LOC_Os01g12390	inactive receptor kinase At2g26730 precursor, putative, expressed
LOC_Os01g66680	S-domain receptor-like protein kinase, putative, expressed
LOC_Os01g48000	S-locus-like receptor protein kinase, putative, expressed
LOC_Os08g06060	CGMC_MAPKCMGC_2_ERK.13 - CGMC includes CDA, MAPK, GSK3, and CLKC kinases, expressed
LOC_Os06g38990	receptor-like protein kinase 2 precursor, putative, expressed
LOC_Os03g55210	TKL_IRAK_CrRLK1L-1.1 - The CrRLK1L-1 subfamily has homology to the CrRLK1L homolog, expressed
LOC_Os10g33640	AGC_AGC_other_NDRh_TRCd.3 - ACG kinases include homologs to PKA, PKG and PKC, expressed
LOC_Os01g70260	receptor-like protein kinase 2 precursor, putative, expressed
LOC_Os08g04420	tyrosine protein kinase domain containing protein, putative, expressed
LOC_Os04g01310	serine/threonine-protein kinase receptor precursor, putative, expressed
LOC_Os07g35370	TKL_IRAK_DUF26-lc.15 - DUF26 kinases have homology to DUF26 containing loci, expressed
LOC_Os09g29600	OsWAK85 - OsWAK receptor-like cytoplasmic kinase OsWAK-RLCK, expressed
LOC_Os02g12010	receptor-like protein kinase precursor, putative, expressed
LOC_Os05g06990	TKL_IRAK_CrRLK1L-1.10 - The CrRLK1L-1 subfamily has homology to the CrRLK1L homolog, expressed
LOC_Os01g07630	BRASSINOSTEROID INSENSITIVE 1-associated receptor kinase 1 precursor, putative, expressed
LOC_Os03g07430	protein kinase domain containing protein, expressed
LOC_Os05g30820	protein kinase, putative, expressed
LOC_Os03g43440	CAMK_KIN1/SNF1/Nim1_like.17 - CAMK includes calcium/calmodulin depedent protein kinases, expressed
LOC_Os07g40630	BRASSINOSTEROID INSENSITIVE 1 precursor, putative, expressed
LOC_Os11g36160	receptor-like protein kinase 2 precursor, putative, expressed
LOC_Os07g35340	TKL_IRAK_DUF26-lc.14 - DUF26 kinases have homology to DUF26 containing loci, expressed
LOC_Os07g04190	receptor protein kinase CLAVATA1 precursor, putative, expressed
LOC_Os03g18370	MRH1, putative, expressed
LOC_Os10g41390	protein kinase domain containing protein, expressed
LOC_Os04g24290	wall-associated receptor kinase 3 precursor, putative, expressed
LOC_Os06g38650	receptor-like protein kinase precursor, putative, expressed
LOC_Os07g35300	TKL_IRAK_DUF26-lc.11 - DUF26 kinases have homology to DUF26 containing loci, expressed
LOC_Os01g60060	leucine-rich repeat family protein, putative, expressed
LOC_Os03g27990	STRUBBELIG-RECEPTOR FAMILY 7 precursor, putative, expressed
LOC_Os07g03840	lectin-like receptor kinase, putative, expressed
LOC_Os04g34360	serine/threonine-protein kinase receptor precursor, putative, expressed
LOC_Os08g25380	serine/threonine-protein kinase BRI1-like 1 precursor, putative, expressed
LOC_Os05g25540	STRUBBELIG-RECEPTOR FAMILY 6 precursor, putative, expressed
LOC_Os10g01100	receptor-like protein kinase, putative, expressed
LOC_Os05g36960	protein kinase, putative, expressed
LOC_Os08g10330	SHR5-receptor-like kinase, putative, expressed
LOC_Os02g54900	STE_PAK_Ste20_STLK.2 - STE kinases include homologs to sterile 7, sterile 11 and sterile 20 from yeast, expressed
LOC_Os03g56270	receptor protein kinase CLAVATA1 precursor, putative, expressed
LOC_Os01g10450	protein kinase domain containing protein, expressed
LOC_Os02g05820	protein kinase domain containing protein, expressed
LOC_Os02g05970	phytosulfokine receptor precursor, putative, expressed
LOC_Os08g05290	receptor-like protein kinase 5 precursor, putative, expressed
LOC_Os01g12720	protein kinase domain containing protein, expressed
LOC_Os02g05730	protein kinase domain containing protein, expressed
LOC_Os07g43570	TKL_IRAK_DUF26-lc.25 - DUF26 kinases have homology to DUF26 containing loci, expressed
LOC_Os07g48760	CAMK_KIN1/SNF1/Nim1_like.32 - CAMK includes calcium/calmodulin depedent protein kinases, expressed
LOC_Os02g06210	phytosulfokine receptor precursor, putative, expressed
LOC_Os05g48660	MRH1, putative, expressed
LOC_Os07g35790	TKL_IRAK_DUF26-ld.5 - DUF26 kinases have homology to DUF26 containing loci, expressed
LOC_Os02g49040	CAMK_CAMK_like_unique.1 - CAMK includes calcium/calmodulin depedent protein kinases, expressed
LOC_Os04g46180	AGC_PVPK_like_kin82y.11 - ACG kinases include homologs to PKA, PKG and PKC, expressed
LOC_Os01g02360	resistance-related receptor-like kinase, putative, expressed
LOC_Os01g07560	receptor-like protein kinase 2 precursor, putative, expressed
LOC_Os03g51040	STRUBBELIG-RECEPTOR FAMILY 6 precursor, putative, expressed
LOC_Os04g39930	receptor-like protein kinase, putative, expressed
LOC_Os08g02020	transferase family protein, putative, expressed
LOC_Os01g68870	leucine-rich repeat receptor protein kinase EXS precursor, putative, expressed
LOC_Os04g53994	kinase, putative, expressed
LOC_Os04g41530	serine/threonine-protein kinase GCN2, putative, expressed
LOC_Os02g08530	protein kinase family protein, putative, expressed
LOC_Os06g12120	BRASSINOSTEROID INSENSITIVE 1-associated receptor kinase 1 precursor, putative, expressed
LOC_Os06g38340	receptor-like protein kinase precursor, putative, expressed
LOC_Os07g03860	lectin-like receptor kinase 7, putative, expressed
LOC_Os10g05250	protein kinase domain containing protein, expressed
LOC_Os01g10430	protein kinase family protein, putative, expressed
LOC_Os03g03410	serine/threonine-protein kinase, putative, expressed
LOC_Os04g58700	expressed protein
LOC_Os04g12600	receptor-like protein kinase, putative, expressed
LOC_Os06g03980	expressed protein
LOC_Os02g12420	receptor-like protein kinase precursor, putative, expressed
LOC_Os07g36544	serine/threonine-protein kinase receptor precursor, putative, expressed
LOC_Os04g45920	protein kinase domain containing protein, expressed
LOC_Os02g17710	receptor-like protein kinase 5 precursor, putative, expressed
LOC_Os09g29584	OsWAK84 - OsWAK receptor-like protein OsWAK-RLP, expressed
LOC_Os02g08140	CAMK_KIN1/SNF1/Nim1_like.14 - CAMK includes calcium/calmodulin depedent protein kinases, expressed
LOC_Os12g10740	leucine-rich repeat family protein, putative, expressed
LOC_Os12g01200	senescence-induced receptor-like serine/threonine-protein kinase precursor, putative, expressed
LOC_Os04g45170	leucine-rich repeat family protein, putative, expressed
LOC_Os07g44710	CAMK_CAMK_like.36 - CAMK includes calcium/calmodulin depedent protein kinases, expressed
LOC_Os12g39630	CAMK_CAMK_like.49 - CAMK includes calcium/calmodulin depedent protein kinases, expressed
LOC_Os06g38490	retrotransposon protein, putative, unclassified, expressed
LOC_Os02g34430	serine/threonine-protein kinase, putative, expressed
LOC_Os04g34370	serine/threonine-protein kinase receptor precursor, putative, expressed
LOC_Os01g66640	S-domain receptor-like protein kinase, putative, expressed
LOC_Os12g44090	leucine-rich repeat family protein, putative, expressed
LOC_Os02g10110	Leucine Rich Repeat family protein, expressed
LOC_Os02g09359	BRASSINOSTEROID INSENSITIVE 1-associated receptor kinase 1 precursor, putative, expressed
LOC_Os01g60330	inactive receptor kinase At2g26730 precursor, putative, expressed
LOC_Os01g49910	expressed protein
LOC_Os02g04230	CGMC_MAPKCMGC_2.7 - CGMC includes CDA, MAPK, GSK3, and CLKC kinases, expressed
LOC_Os07g08860	S-domain receptor-like protein kinase, putative, expressed
LOC_Os02g48080	cysteine-rich receptor-like protein kinase 7 precursor, putative, expressed
LOC_Os11g40370	protein kinase family protein, putative, expressed
LOC_Os04g55620	receptor kinase, putative, expressed
LOC_Os03g61310	receptor-like protein kinase, putative, expressed
LOC_Os09g39650	protein kinase family protein, putative, expressed
LOC_Os03g21510	inactive receptor kinase At2g26730 precursor, putative, expressed
LOC_Os08g03020	lectin-like receptor kinase 1, putative, expressed
LOC_Os02g53750	tyrosine protein kinase domain containing protein, putative, expressed
LOC_Os07g05190	leucine-rich repeat family protein, putative, expressed
LOC_Os04g48760	leucine-rich repeat family protein, putative, expressed
LOC_Os06g42800	STRUBBELIG-RECEPTOR FAMILY 8 precursor, putative, expressed
LOC_Os02g42190	OsWAK16 - OsWAK receptor-like protein kinase, expressed
LOC_Os02g12440	receptor kinase, putative, expressed
LOC_Os04g47300	CAMK_CAMK_like.26 - CAMK includes calcium/calmodulin depedent protein kinases, expressed
LOC_Os03g49750	protein kinase family protein, putative, expressed
LOC_Os05g07820	leucine-rich repeat receptor protein kinase EXS precursor, putative, expressed
LOC_Os01g73005	expressed protein
LOC_Os01g70130	protein kinase domain containing protein, expressed
LOC_Os01g73000	copine, putative, expressed
LOC_Os01g60670	receptor-like protein kinase precursor, putative, expressed
LOC_Os01g46030	receptor-like protein kinase, putative, expressed
LOC_Os04g15650	Leucine Rich Repeat family protein, expressed
LOC_Os05g07420	S-domain receptor-like protein kinase, putative, expressed
LOC_Os08g39240	OsWAK76 - OsWAK receptor-like cytoplasmic kinase OsWAK-RLCK, expressed
LOC_Os01g70970	protein kinase, putative, expressed
LOC_Os08g02030	transferase family protein, putative, expressed
LOC_Os02g43870	inactive receptor kinase At2g26730 precursor, putative, expressed
LOC_Os07g35410	TKL_IRAK_DUF26-lc.18 - DUF26 kinases have homology to DUF26 containing loci, expressed
LOC_Os05g51190	protein kinase family protein, putative, expressed
LOC_Os11g35500	receptor-like protein kinase 5 precursor, putative, expressed
LOC_Os01g65650	receptor-like protein kinase HAIKU2 precursor, putative, expressed
LOC_Os11g36090	receptor kinase, putative, expressed
LOC_Os03g21730	receptor-like protein kinase precursor, putative, expressed
LOC_Os11g01200	senescence-induced receptor-like serine/threonine-protein kinase precursor, putative, expressed
LOC_Os12g26940	CHASE domain containing protein, expressed
LOC_Os09g38850	OsWAK91 - OsWAK receptor-like protein kinase, expressed
LOC_Os07g35390	TKL_IRAK_DUF26-lc.17 - DUF26 kinases have homology to DUF26 containing loci, expressed
LOC_Os07g48310	inactive receptor kinase At2g26730 precursor, putative, expressed
LOC_Os12g43660	receptor-like protein kinase HAIKU2 precursor, putative, expressed
LOC_Os03g20450	expressed protein
LOC_Os01g36790	TKL_IRAK_DUF26-lf.2 - DUF26 kinases have homology to DUF26 containing loci, expressed
LOC_Os07g03810	lectin-like receptor kinase 7, putative, expressed
LOC_Os06g17490	expressed protein
LOC_Os01g73390	expressed protein
LOC_Os03g18630	receptor-like kinase RHG1, putative, expressed
LOC_Os07g48730	tyrosine protein kinase domain containing protein, putative, expressed
LOC_Os02g02040	protein kinase, putative, expressed
LOC_Os11g35330	LYK, putative, expressed
LOC_Os05g33080	serine/threonine-protein kinase, putative, expressed
LOC_Os01g42400	STE_MEK_ste7_MAP2K.3 - STE kinases include homologs to sterile 7, sterile 11 and sterile 20 from yeast, expressed
LOC_Os01g57510	receptor protein kinase, putative, expressed
LOC_Os01g04230	inactive receptor kinase At2g26730 precursor, putative, expressed
LOC_Os01g43350	protein kinase family protein, putative, expressed
LOC_Os08g24770	protein kinase, putative, expressed
LOC_Os07g31500	leucine-rich repeat receptor protein kinase EXS precursor, putative, expressed
LOC_Os01g05940	receptor kinase, putative, expressed
LOC_Os12g41490	cysteine-rich receptor-like protein kinase 8 precursor, putative, expressed
LOC_Os10g06950	calcium-dependent protein kinase 12, putative, expressed
LOC_Os10g25550	tyrosine protein kinase domain containing protein, putative, expressed
LOC_Os06g10790	lectin-like receptor kinase, putative, expressed
LOC_Os11g07180	receptor protein kinase CLAVATA1 precursor, putative, expressed
LOC_Os07g35290	TKL_IRAK_DUF26-lc.10 - DUF26 kinases have homology to DUF26 containing loci, expressed
LOC_Os12g24550	expressed protein
LOC_Os08g10290	SHR5-receptor-like kinase, putative, expressed
LOC_Os07g38640	inactive receptor kinase At2g26730 precursor, putative, expressed
LOC_Os04g04330	receptor-like protein kinase 2 precursor, putative, expressed
LOC_Os05g36050	serine/threonine-protein kinase, putative, expressed
LOC_Os07g31190	OsWAK71 - OsWAK receptor-like cytoplasmic kinase OsWAK-RLCK, expressed
LOC_Os08g40170	cyclin-dependent kinase B2-1, putative, expressed
LOC_Os10g18260	TKL_IRAK_DUF26-lc.27 - DUF26 kinases have homology to DUF26 containing loci, expressed
LOC_Os09g12240	serine/threonine-protein kinase BRI1-like 1 precursor, putative, expressed
LOC_Os07g32480	mitotic checkpoint serine/threonine-protein kinase BUB1, putative, expressed
LOC_Os01g02560	Ser/Thr receptor-like kinase, putative, expressed
LOC_Os04g30010	OsWAK45 - OsWAK receptor-like protein kinase, expressed
LOC_Os10g06560	cyclin-dependent kinase G-1, putative, expressed
LOC_Os11g25510	protein kinase domain containing protein, expressed
LOC_Os09g21510	STE_MEKK_ste11_MAP3K.2 - STE kinases include homologs to sterile 7, sterile 11 and sterile 20 from yeast, expressed
LOC_Os02g04240	wee1-like protein kinase, putative, expressed
LOC_Os11g10260	retrotransposon protein, putative, Ty3-gypsy subclass, expressed
LOC_Os01g15480	EMB3013, putative, expressed
LOC_Os11g10280	receptor-like protein kinase, putative, expressed
LOC_Os11g10290	S-domain receptor-like protein kinase, putative, expressed
LOC_Os07g04110	legume lectins beta domain containing protein, expressed
LOC_Os02g02490	phytosulfokine receptor precursor, putative, expressed
LOC_Os12g41260	protein kinase domain containing protein, expressed
LOC_Os01g60280	ATP binding protein, putative, expressed
LOC_Os05g13770	RNA polymerase Rpb7, N-terminal domain containing protein, expressed
LOC_Os02g13780	receptor-like protein kinase 2 precursor, putative, expressed
LOC_Os01g09580	CAMK_CAMK_like_Aur_like.1 - CAMK includes calcium/calmodulin depedent protein kinases, expressed
LOC_Os03g24930	tyrosine protein kinase domain containing protein, putative, expressed
LOC_Os09g23570	inactive receptor kinase At2g26730 precursor, putative, expressed
LOC_Os06g38590	receptor-like protein kinase precursor, putative, expressed
LOC_Os08g03240	lectin-like receptor kinase 1, putative, expressed
LOC_Os12g01700	inactive receptor kinase At2g26730 precursor, putative, expressed
LOC_Os11g01620	inactive receptor kinase At2g26730 precursor, putative, expressed
LOC_Os10g06800	cyclin-dependent kinase G-2, putative, expressed
LOC_Os12g42020	AGC_PVPK_like_kin82y.20 - ACG kinases include homologs to PKA, PKG and PKC, expressed
LOC_Os08g32600	STE_MEKK_ste11_MAP3K.21 - STE kinases include homologs to sterile 7, sterile 11 and sterile 20 from yeast, expressed
LOC_Os04g47570	protein kinase domain containing protein, expressed
LOC_Os10g02360	OsWAK98 - OsWAK receptor-like cytoplasmic kinase OsWAK-RLCK, expressed
LOC_Os11g40970	receptor-like protein kinase precursor, putative, expressed
LOC_Os12g40419	protein kinase domain containing protein, expressed
LOC_Os01g53920	receptor-like protein kinase 5 precursor, putative, expressed
LOC_Os08g02440	expressed protein
LOC_Os05g25390	tyrosine protein kinase domain containing protein, putative, expressed
LOC_Os09g25100	CAMK_KIN1/SNF1/Nim1_like.35 - CAMK includes calcium/calmodulin depedent protein kinases, expressed
LOC_Os04g49460	protein kinase domain containing protein, expressed
LOC_Os10g38920	protein kinase domain containing protein, expressed
LOC_Os08g33090	inactive receptor kinase At2g26730 precursor, putative, expressed
LOC_Os10g38800	leucine-rich repeat transmembrane protein kinase, putative, expressed
LOC_Os04g54130	TKL_IRAK_DUF26-ld.1 - DUF26 kinases have homology to DUF26 containing loci, expressed
LOC_Os04g52780	leucine-rich repeat receptor protein kinase EXS precursor, putative, expressed
LOC_Os06g45630	expressed protein
LOC_Os08g10300	SHR5-receptor-like kinase, putative, expressed
LOC_Os03g02190	protein kinase domain containing protein, expressed
LOC_Os11g41100	expressed protein
LOC_Os01g04580	Ser/Thr protein kinase, putative, expressed
LOC_Os02g56370	OsWAK20 - OsWAK receptor-like protein kinase, expressed
LOC_Os04g28780	serine/threonine-protein kinase receptor precursor, putative, expressed
LOC_Os03g18640	laccase precursor protein, putative, expressed
LOC_Os10g06780	protein kinase domain containing protein, expressed
LOC_Os05g41370	TKL_IRAK_DUF26-la.1 - DUF26 kinases have homology to DUF26 containing loci, expressed
LOC_Os11g36140	receptor-like protein kinase 2 precursor, putative, expressed
LOC_Os12g41410	receptor-like protein kinase homolog RK20-1, putative, expressed
LOC_Os02g14480	receptor-like kinase, putative, expressed
LOC_Os02g41500	OsWAK13 - OsWAK receptor-like protein kinase, expressed
LOC_Os07g35280	TKL_IRAK_DUF26-lc.1 - DUF26 kinases have homology to DUF26 containing loci, expressed
LOC_Os02g42780	lectin receptor-type protein kinase, putative, expressed
LOC_Os12g41530	cysteine-rich receptor-like protein kinase 8 precursor, putative, expressed
LOC_Os03g56160	lectin-like receptor kinase 7, putative, expressed
LOC_Os07g03820	lectin-like receptor kinase, putative, expressed
LOC_Os07g35740	TKL_IRAK_DUF26-ld.2 - DUF26 kinases have homology to DUF26 containing loci, expressed
LOC_Os04g30160	OsWAK46 - OsWAK receptor-like protein kinase, expressed
LOC_Os05g44930	receptor-like protein kinase, putative, expressed
LOC_Os09g38840	OsWAK90 - OsWAK receptor-like protein kinase, expressed
LOC_Os07g04810	protein kinase domain containing protein, expressed
LOC_Os11g07225	expressed protein
LOC_Os06g47700	serine/threonine-protein kinase BRI1-like 2 precursor, putative, expressed
LOC_Os01g02430	TAK14, putative, expressed
LOC_Os01g02460	receptor kinase LRK10, putative, expressed
LOC_Os01g12790	receptor protein kinase, putative, expressed
LOC_Os01g26390	TKL_IRAK_DUF26-lh.1 - DUF26 kinases have homology to DUF26 containing loci, expressed
LOC_Os01g65060	S-domain receptor-like protein kinase, putative, expressed
LOC_Os02g06200	phytosulfokine receptor precursor, putative, expressed
LOC_Os02g06205	phytosulfokine receptor precursor, putative, expressed
LOC_Os02g13430	receptor-like protein kinase 5 precursor, putative, expressed
LOC_Os02g19530	lectin-like receptor kinase, putative, expressed
LOC_Os02g40200	receptor-like protein kinase precursor, putative, expressed
LOC_Os02g44920	protein kinase domain containing protein, expressed
LOC_Os03g56180	legume lectins beta domain containing protein, expressed
LOC_Os04g05560	kinase, putative, expressed
LOC_Os04g12580	receptor-like protein kinase, putative, expressed
LOC_Os04g15580	serine/threonine-protein kinase receptor precursor, putative, expressed
LOC_Os04g20680	wall-associated receptor kinase 3 precursor, putative, expressed
LOC_Os04g22120	protein kinase, putative, expressed
LOC_Os04g29580	OsWAK37 - OsWAK short gene, expressed
LOC_Os04g30260	OsWAK47 - OsWAK receptor-like protein kinase, expressed
LOC_Os04g30370	OsWAK57 - OsWAK receptor-like protein kinase, expressed
LOC_Os04g54070	receptor-like kinase, putative, expressed
LOC_Os04g54180	serine/threonine-protein kinase receptor precursor, putative, expressed
LOC_Os04g58980	pentatricopeptide, putative, expressed
LOC_Os05g07450	S-domain receptor-like protein kinase, putative, expressed
LOC_Os05g07850	receptor-like kinase, putative, expressed
LOC_Os05g25370	TKL_IRAK_CrRLK1L-1.2 - The CrRLK1L-1 subfamily has homology to the CrRLK1L homolog, expressed
LOC_Os05g44940	protein kinase domain containing protein, expressed
LOC_Os05g44990	light repressible receptor protein kinase, putative, expressed
LOC_Os06g41560	receptor-like protein kinase, putative, expressed
LOC_Os06g41960	lysM-domain containing receptor-like kinase, putative, expressed
LOC_Os06g47750	phytosulfokine receptor precursor, putative, expressed
LOC_Os06g49260	OsWAK65 - OsWAK receptor-like protein kinase, expressed
LOC_Os07g03000	receptor-like protein kinase precursor, putative, expressed
LOC_Os07g03780	lectin-like receptor kinase, putative, expressed
LOC_Os07g03790	lectin-like receptor kinase 7, putative, expressed
LOC_Os07g03970	lectin-like receptor kinase 7, putative, expressed
LOC_Os07g18230	lectin-like receptor kinase, putative, expressed
LOC_Os07g18240	lectin-like receptor kinase, putative, expressed
LOC_Os07g31210	OsWAK70 - OsWAK receptor-like cytoplasmic kinase OsWAK-RLCK, expressed
LOC_Os07g35380	TKL_IRAK_DUF26-lc.16 - DUF26 kinases have homology to DUF26 containing loci, expressed
LOC_Os07g38250	expressed protein
LOC_Os07g38820	lectin-like receptor kinase, putative, expressed
LOC_Os08g24630	protein kinase domain containing protein, expressed
LOC_Os08g29040	protein kinase domain containing protein, expressed
LOC_Os09g14580	protein kinase domain containing protein, expressed
LOC_Os09g19350	expressed protein
LOC_Os09g29560	OsWAK83 - OsWAK pseudogene, expressed
LOC_Os09g38800	OsWAK88 - OsWAK pseudogene, expressed
LOC_Os09g38830	OsWAK89a - OsWAK receptor-like protein kinase, expressed
LOC_Os09g38834	OsWAK89b - OsWAK receptor-like protein kinase, expressed
LOC_Os10g02990	leucine-rich repeat receptor-like protein kinase 1, putative, expressed
LOC_Os11g07130	receptor kinase, putative, expressed
LOC_Os11g07200	receptor protein kinase CLAVATA1 precursor, putative, expressed
LOC_Os11g07240	serine/threonine-protein kinase BRI1-like 2 precursor, putative, expressed
LOC_Os11g32060	retrotransposon protein, putative, unclassified, expressed
LOC_Os11g35290	OsWAK119 - OsWAK receptor-like cytoplasmic kinase OsWAK-RLCK, expressed
LOC_Os11g47030	receptor protein kinase, putative, expressed
LOC_Os11g47240	leucine-rich repeat receptor protein kinase EXS precursor, putative, expressed
LOC_Os12g03640	S-locus-like receptor protein kinase, putative, expressed
LOC_Os12g03670	D-mannose binding lectin family protein, expressed
LOC_Os12g16520	wall-associated receptor kinase 3 precursor, putative, expressed
LOC_Os12g41270	cysteine-rich receptor-like protein kinase 20 precursor, putative, expressed
LOC_Os01g02370	receptor-like kinase ARK1AS, putative, expressed
LOC_Os01g02590	receptor-like kinase, putative, expressed
LOC_Os01g26270	OsWAK7 - OsWAK receptor-like protein kinase, expressed
LOC_Os01g26300	OsWAK9 - OsWAK receptor-like cytoplasmic kinase OsWAK-RLCK, expressed
LOC_Os01g33110	receptor-like protein kinase 5 precursor, putative, expressed
LOC_Os01g38850	receptor-like serine-threonine protein kinase, putative, expressed
LOC_Os01g38910	cysteine-rich receptor-like protein kinase 10 precursor, putative, expressed
LOC_Os01g41910	receptor-like protein kinase 5 precursor, putative, expressed
LOC_Os02g06280	receptor-like protein kinase 2 precursor, putative, expressed
LOC_Os02g06600	receptor-like protein kinase 2 precursor, putative, expressed
LOC_Os02g12130	cysteine-rich receptor-like protein kinase 35 precursor, putative, expressed
LOC_Os02g13460	receptor-like protein kinase 2 precursor, putative, expressed
LOC_Os02g34770	receptor-like protein kinase 2 precursor, putative
LOC_Os02g42160	OsWAK15 - OsWAK receptor-like protein kinase, expressed
LOC_Os02g43250	receptor-like protein kinase precursor, putative, expressed
LOC_Os03g03290	receptor-like protein kinase At3g46290 precursor, putative, expressed
LOC_Os03g31260	cysteine-rich receptor-like protein kinase 28 precursor, putative
LOC_Os03g59950	receptor-like kinase, putative, expressed
LOC_Os04g01860	cysteine-rich receptor-like protein kinase 7 precursor, putative, expressed
LOC_Os04g03370	cysteine-rich receptor-like protein kinase 41 precursor, putative, expressed
LOC_Os04g03530	cysteine-rich receptor-like protein kinase 37 precursor, putative, expressed
LOC_Os04g06090	cysteine-rich receptor-like protein kinase 37 precursor, putative, expressed
LOC_Os04g06210	cysteine-rich receptor-like protein kinase 36 precursor, putative, expressed
LOC_Os04g07200	S-domain receptor-like protein kinase, putative, expressed
LOC_Os04g14304	OsWAK30/31 - OsWAK receptor-like protein OsWAK-RLP, expressed
LOC_Os04g21790	OsWAK34 - OsWAK receptor-like protein kinase, expressed
LOC_Os04g25060	cysteine-rich receptor-like protein kinase, putative, expressed
LOC_Os04g25650	cysteine-rich receptor-like protein kinase, putative, expressed
LOC_Os04g29740	OsWAK39 - OsWAK receptor-like protein kinase, expressed
LOC_Os04g29790	OsWAK40 - OsWAK receptor-like protein OsWAK-RLP, expressed
LOC_Os04g29880	OsWAK41 - OsWAK receptor-like protein OsWAK-RLP, expressed
LOC_Os04g30030	cysteine-rich receptor-like protein kinase 12 precursor, putative, expressed
LOC_Os04g30280	OsWAK48 - OsWAK receptor-like protein OsWAK-RLP, expressed
LOC_Os04g30330	OsWAK59 - OsWAK receptor-like cytoplasmic kinase OsWAK-RLCK, expressed
LOC_Os04g30360	OsWAK58 - OsWAK receptor-like protein kinase, expressed
LOC_Os04g35114	receptor-like kinase, putative, expressed
LOC_Os04g42480	receptor-like protein kinase At3g46290 precursor, putative, expressed
LOC_Os04g49690	FERONIA receptor-like kinase, putative, expressed
LOC_Os04g56360	cysteine-rich receptor-like protein kinase 8 precursor, putative, expressed
LOC_Os04g56430	cysteine-rich receptor-like protein kinase, putative, expressed
LOC_Os05g07080	S-domain receptor-like protein kinase, putative, expressed
LOC_Os05g33690	receptor-like protein kinase precursor, putative, expressed
LOC_Os05g44950	senescence-induced receptor-like serine/threonine-protein kinase precursor, putative, expressed
LOC_Os05g45000	senescence-induced receptor-like serine/threonine-protein kinase precursor, putative, expressed
LOC_Os06g05050	OsWAK61 - OsWAK receptor-like protein kinase, expressed
LOC_Os06g08154	receptor-like protein kinase 5 precursor, putative, expressed
LOC_Os06g47710	leucine-rich repeat receptor-like kinase, putative, expressed
LOC_Os07g02450	receptor-like protein kinase 2 precursor, putative, expressed
LOC_Os07g26180	cysteine-rich receptor-like protein kinase 42 precursor, putative, expressed
LOC_Os08g25430	cysteine-rich receptor-like protein kinase 35 precursor, putative, expressed
LOC_Os08g27810	OsWAK115 - OsWAK receptor-like protein OsWAK-RLP, expressed
LOC_Os09g02410	S-domain receptor-like protein kinase, putative, expressed
LOC_Os09g16590	cysteine-rich receptor-like protein kinase 21 precursor, putative, expressed
LOC_Os09g17880	senescence-induced receptor-like serine/threonine-protein kinase precursor, putative, expressed
LOC_Os09g17990	senescence-induced receptor-like serine/threonine-protein kinase precursor, putative, expressed
LOC_Os09g18000	senescence-induced receptor-like serine/threonine-protein kinase precursor, putative, expressed
LOC_Os09g18040	senescence-induced receptor-like serine/threonine-protein kinase precursor, putative
LOC_Os09g19360	senescence-induced receptor-like serine/threonine-protein kinase precursor, putative, expressed
LOC_Os09g19380	receptor-like protein kinase precursor, putative, expressed
LOC_Os09g19390	senescence-induced receptor-like serine/threonine-protein kinase precursor, putative, expressed
LOC_Os09g19400	senescence-induced receptor-like serine/threonine-protein kinase precursor, putative, expressed
LOC_Os09g19500	senescence-induced receptor-like serine/threonine-protein kinase precursor, putative, expressed
LOC_Os09g20740	OsWAK79 - OsWAK receptor-like protein kinase, expressed
LOC_Os09g29540	OsWAK82 - OsWAK receptor-like cytoplasmic kinase OsWAK-RLCK, expressed
LOC_Os10g01390	OsWAK93 - OsWAK receptor-like cytoplasmic kinase OsWAK-RLCK
LOC_Os10g01410	OsWAK94 - OsWAK receptor-like protein OsWAK-RLP, expressed
LOC_Os10g02276	OsWAK96 - OsWAK receptor-like protein kinase, expressed
LOC_Os10g02720	OsWAK99 - OsWAK receptor-like protein kinase, expressed
LOC_Os10g03420	receptor-like protein kinase 2 precursor, putative, expressed
LOC_Os10g05170	OsWAK100 - OsWAK receptor-like cytoplasmic kinase OsWAK-RLCK, expressed
LOC_Os10g09550	OsWAK106 - OsWAK receptor-like protein kinase, expressed
LOC_Os10g09570	OsWAK107 - OsWAK receptor-like protein OsWAK-RLP, expressed
LOC_Os10g09620	OsWAK108 - OsWAK receptor-like protein kinase, expressed
LOC_Os10g09690	OsWAK109 - OsWAK receptor-like protein kinase, expressed
LOC_Os10g17890	OsWAK113 - OsWAK receptor-like protein OsWAK-RLP, expressed
LOC_Os10g38450	receptor-like protein kinase 2 precursor, putative, expressed
LOC_Os11g09110	receptor-like protein kinase 5 precursor, putative, expressed
LOC_Os11g09130	receptor-like protein kinase 5 precursor, putative, expressed
LOC_Os11g11780	cysteine-rich receptor-like protein kinase 21 precursor, putative, expressed
LOC_Os11g29510	cysteine-rich receptor-like protein kinase 35 precursor, putative, expressed
LOC_Os11g35260	OsWAK118 - OsWAK receptor-like cytoplasmic kinase OsWAK-RLCK
LOC_Os11g36000	receptor-like protein kinase 2 precursor, putative, expressed
LOC_Os11g36120	receptor-like protein kinase precursor, putative, expressed
LOC_Os11g39450	cysteine-rich receptor-like protein kinase 7 precursor, putative, expressed
LOC_Os11g44690	cysteine-rich receptor-like protein kinase 19 precursor, putative, expressed
LOC_Os11g44860	cysteine-rich receptor-like protein kinase 28 precursor, putative, expressed
LOC_Os11g46960	receptor-like protein kinase precursor, putative, expressed
LOC_Os11g47110	OsWAK121 - OsWAK receptor-like protein kinase, expressed
LOC_Os11g47170	receptor-like protein kinase precursor, putative, expressed
LOC_Os11g47490	senescence-induced receptor-like serine/threonine-protein kinase precursor, putative, expressed
LOC_Os12g14480	cysteine-rich receptor-like protein kinase 23 precursor, putative, expressed
LOC_Os12g14610	cysteine-rich receptor-like protein kinase 32 precursor, putative, expressed
LOC_Os12g16540	OsWAK124 - OsWAK receptor-like protein OsWAK-RLP, expressed
LOC_Os12g29430	OsWAK125 - OsWAK receptor-like protein OsWAK-RLP, expressed
LOC_Os12g42064	OsWAK129c - OsWAK receptor-like protein kinase, expressed
LOC_Os02g47160	OsWAK17 - OsWAK short gene, expressed
LOC_Os02g56334	OsWAK18b - OsWAK short gene, expressed
LOC_Os02g56350	OsWAK19 - OsWAK short gene, expressed
LOC_Os02g56420	OsWAK23 - OsWAK short gene, expressed
LOC_Os04g24294	OsWAK35d - OsWAK short gene, expressed
LOC_Os04g51009	OsWAK52 - OsWAK short gene, expressed
LOC_Os04g55750	OsWAK54 - OsWAK short gene, expressed
LOC_Os06g07260	OsWAK62 - OsWAK short gene, expressed
LOC_Os07g07390	OsWAK66 - OsWAK pseudogene, expressed
LOC_Os07g14470	OsWAK67 - OsWAK short gene, expressed
LOC_Os09g16980	OsWAK86 - OsWAK pseudogene, expressed
LOC_Os12g42044	OsWAK127b - OsWAK short gene, expressed
LOC_Os02g58390	inactive receptor kinase At2g26730 precursor, putative, expressed
LOC_Os08g45060	protein Kinase-like protein TMKL1 precursor, putative, expressed
LOC_Os09g20970	receptor kinase, putative, expressed
LOC_Os11g19480	receptor protein kinase-like protein At4g34220 precursor, putative, expressed
LOC_Os12g13300	expressed protein
LOC_Os11g20360	expressed protein
LOC_Os03g01410	Leucine Rich Repeat family protein, expressed
LOC_Os07g10630	expressed protein
LOC_Os10g18990	receptor kinase 2, putative, expressed
LOC_Os02g26950	expressed protein
LOC_Os02g34800	leucine-rich repeat receptor protein kinase EXS precursor, putative, expressed
LOC_Os10g03050	leucine-rich repeat receptor protein kinase EXS precursor, putative, expressed
LOC_Os03g52794	phosphatidylinositol kinase, putative, expressed
LOC_Os04g55410	FGGY family of carbohydrate kinases, putative, expressed
LOC_Os04g01874	protein kinase, putative, expressed
LOC_Os07g04130	expressed protein
LOC_Os07g15940	legume lectins beta domain containing protein, expressed
LOC_Os04g30060	wall-associated receptor kinase-like 10 precursor, putative, expressed
LOC_Os06g44430	protein kinase, putative, expressed
LOC_Os07g35770	TKL_IRAK_DUF26-ld.4 - DUF26 kinases have homology to DUF26 containing loci
LOC_Os03g51060	inactive receptor kinase At2g26730 precursor, putative, expressed
LOC_Os10g34220	TKL_IRAK_DUF26-lf.1 - DUF26 kinases have homology to DUF26 containing loci, expressed
LOC_Os04g09770	Ser/Thr protein kinase, putative, expressed
LOC_Os06g34960	TKL_IRAK_DUF26.1 - DUF26 kinases have homology to DUF26 containing loci, expressed
LOC_Os12g30180	protein kinase domain containing protein, expressed
LOC_Os03g29410	tyrosine protein kinase domain containing protein, putative, expressed
LOC_Os02g53030	mitogen-activated protein kinase kinase kinase 1, putative, expressed
LOC_Os04g56060	protein kinase domain containing protein, expressed
LOC_Os11g18980	expressed protein
LOC_Os01g04550	expressed protein
LOC_Os02g57560	tyrosine protein kinase domain containing protein, putative, expressed
LOC_Os12g14699	protein kinase domain containing protein, expressed
LOC_Os01g39820	expressed protein
LOC_Os12g41710	Protein kinase domain containing protein, expressed
LOC_Os03g61010	protein kinase family protein, putative, expressed
LOC_Os01g16230	TKL_IRAK_CR4L.2 - The CR4L subfamily has homology with Crinkly4, expressed
LOC_Os05g41950	protein kinase, putative, expressed
LOC_Os08g10070	protein kinase, putative, expressed
LOC_Os04g32310	serine/threonine-protein kinase NAK, putative, expressed
LOC_Os11g19490	expressed protein
LOC_Os03g62700	protein kinase, putative, expressed
LOC_Os09g15580	expressed protein
LOC_Os11g02830	protein kinase domain containing protein, expressed
LOC_Os12g02810	protein kinase domain containing protein, expressed
LOC_Os04g46320	inactive receptor kinase At2g26730 precursor, putative, expressed
LOC_Os03g03890	protein kinase family protein, putative, expressed
LOC_Os04g56120	protein kinase domain containing protein, expressed
LOC_Os09g03620	wall-associated receptor kinase-like 20 precursor, putative, expressed
LOC_Os05g04520	protein kinase, putative, expressed
LOC_Os04g58750	protein kinase family protein, putative, expressed
LOC_Os06g47530	TKL_IRAK_DUF26-lh.6 - DUF26 kinases have homology to DUF26 containing loci, expressed
LOC_Os11g44660	protein kinase, putative, expressed
LOC_Os01g03690	TKL_IRAK_DUF26-lg.1 - DUF26 kinases have homology to DUF26 containing loci, expressed
LOC_Os04g41310	STRUBBELIG-RECEPTOR FAMILY 8 precursor, putative, expressed
LOC_Os02g57440	LYK8, putative, expressed
LOC_Os03g15770	tyrosine protein kinase domain containing protein, putative, expressed
LOC_Os01g41730	serine/threonine-protein kinase, putative, expressed
LOC_Os01g59560	protein kinase domain containing protein, expressed
LOC_Os01g19160	protein kinase domain containing protein, expressed
LOC_Os11g44560	protein kinase domain containing protein, expressed
LOC_Os01g57540	protein kinase, putative, expressed
LOC_Os09g33630	protein kinase domain containing protein, expressed
LOC_Os02g44610	protein kinase, putative, expressed
LOC_Os06g46330	Protein kinase domain containing protein, expressed
LOC_Os04g47620	protein kinase APK1B, chloroplast precursor, putative, expressed
LOC_Os01g74200	protein kinase domain containing protein, expressed
LOC_Os04g30040	jacalin-like lectin domain containing protein, expressed
LOC_Os09g12300	serine/threonine-protein kinase NAK, putative, expressed
LOC_Os11g40380	expressed protein
LOC_Os07g31290	tyrosine protein kinase domain containing protein, putative, expressed
LOC_Os02g12340	conserved hypothetical protein
LOC_Os01g01110	expressed protein
LOC_Os11g34610	TKL_IRAK_DUF26-lc.28 - DUF26 kinases have homology to DUF26 containing loci, expressed
LOC_Os11g44500	protein kinase domain containing protein, expressed
LOC_Os07g35730	TKL_IRAK_DUF26-lc.23 - DUF26 kinases have homology to DUF26 containing loci, expressed
LOC_Os01g66040	receptor kinase, putative, expressed
LOC_Os01g73370	S-locus lectin protein kinase family protein, putative, expressed
LOC_Os02g16790	inactive receptor kinase At2g26730 precursor, putative, expressed
LOC_Os02g58610	protein kinase, putative, expressed
LOC_Os04g04800	protein kinase domain containing protein, expressed
LOC_Os04g12180	TKL_IRAK_DUF26-lc.8 - DUF26 kinases have homology to DUF26 containing loci, expressed
LOC_Os05g07470	D-mannose binding lectin family protein, expressed
LOC_Os05g14030	receptor kinase, putative, expressed
LOC_Os05g38010	inactive receptor kinase At2g26730 precursor, putative, expressed
LOC_Os05g51400	protein kinase APK1B, chloroplast precursor, putative, expressed
LOC_Os06g18810	expressed protein
LOC_Os06g38100	S-locus-like receptor protein kinase, putative
LOC_Os07g36980	TKL_IRAK_DUF26-ld.7 - DUF26 kinases have homology to DUF26 containing loci, expressed
LOC_Os08g03040	expressed protein
LOC_Os09g17890	expressed protein
LOC_Os10g05160	expressed protein
LOC_Os10g24850	expressed protein
LOC_Os11g07190	expressed protein
LOC_Os11g18670	ubiquitin family protein, putative, expressed
LOC_Os11g34624	TKL_IRAK_DUF26-lc.29 - DUF26 kinases have homology to DUF26 containing loci, expressed
LOC_Os11g35100	conserved hypothetical protein
LOC_Os11g39420	jacalin-like lectin domain containing protein, expressed
LOC_Os11g39490	jacalin-like lectin domain containing protein, expressed
LOC_Os11g39530	jacalin-like lectin domain containing protein, expressed
LOC_Os11g44260	expressed protein
LOC_Os11g44550	protein kinase family protein, putative, expressed
LOC_Os12g29434	wall-associated receptor kinase 3 precursor, putative, expressed
LOC_Os12g31560	protein kinase, putative, expressed
LOC_Os12g31610	lectin-like protein kinase, putative, expressed
LOC_Os12g33600	expressed protein
