# Supplementary material for: Identification and Analysis of Genes Involved in Double Fertilization in Rice
Source: Int J Mol Sci. 2021 Nov 27;22(23):12850. doi: 10.3390/ijms222312850 (PMC8657449; doi:10.3390/ijms222312850)
Supplement: Supplementary file 1 [file ijms-22-12850-s001.zip › Table S19. The 332 genes related to the fusion of the male-female gametes..xlsx]

## Sheet: Sheet1
Table S19. The 332 genes related to the fusion of the male-female gametes.
Gene ID	Gene product	The average FPKM values of genes in each sample						FC(N2/N3)	FC(M2/M3)	The expression values from RGAP											Gene type
		N1	N2	N3	M1	M2	M3			Leaves-20 days	Shoots	Seedling at four-leaf stage	Pre-emergence inflorescence	Post-emergence inflorescence	Anther	Pistil	Seed-5 DAP	Seed-10 DAP	Embryo-25 DAP	Endosperm-25 DAP
LOC_Os07g49360	peroxidase precursor, putative, expressed	5.33333	3.25667	1.01333	3.90667	2.17333	1.82333	3.21382	1.19196	8.48699	2.2493	5.46122	24.0029	48.4529	0	18.0457	1.07797	0	3.86836	0	peroxidase
LOC_Os04g51300	peroxidase precursor, putative, expressed	11.9933	8.94667	4.19	11.9933	11.1967	9.74667	2.13524	1.14877	98.5383	77.6124	183.041	9.30798	22.5906	0.132679	9.31077	7.53181	0.752891	1.47795	0.195432
LOC_Os06g46799	peroxidase precursor, putative, expressed	120.537	116.39	53.3767	145.863	130.477	104.98	2.18054	1.24287	10.2839	28.3168	35.6925	7.11586	189.045	0.445919	40.9781	6.75096	0	0	0
LOC_Os11g10460	peroxidase precursor, putative, expressed	27.2633	19.7867	7.61667	21.9433	19.58	14.1667	2.59781	1.38212	0	48.9203	10.802	38.8844	13.6553	15.6919	56.7745	79.6319	2.09032	0.455651	0.573577
LOC_Os01g73170	peroxidase precursor, putative, expressed	40.38	178.727	75.49	51.18	202.317	202.483	2.36755	0.999177	11.0936	27.7653	123.821	6.16627	56.3495	103.667	24.0469	5.7698	0.787941	0.612273	3.19414
LOC_Os06g27850	peroxidase precursor, putative, expressed	29.8367	16.94	5.12	62.01	28.6167	20.5833	3.30859	1.39028	0	0	0.788737	0	1.85626	397.469	2.87103	0	0	0	0
LOC_Os03g13080	LYK, putative, expressed	1	3.70333	1.18333	1.38333	5.00333	7.12333	3.12958	0.702387	0	0	0	0	0	0	0.596255	0.534552	0	0	0	RLKs
LOC_Os08g38560	receptor-like protein kinase 2 precursor, putative, expressed	5.50667	3.83667	1.36333	3.45333	1.95	1.45	2.81418	1.34483	0	0	0.613492	0.686931	0.227247	0	1.53926	0.460333	0	2.55752	0
LOC_Os10g38960	lectin-like receptor kinase, putative, expressed	19.5533	26.7033	9.13333	20.0167	27.4833	42.1	2.92372	0.652811	0	0	0.505331	0	0.975815	0	17.4781	0	0	0	0
LOC_Os07g05740	receptor-like protein kinase 2 precursor, putative, expressed	36.5167	26.52	9.63	39.3567	21.0867	15.41	2.75389	1.36838	0.524366	2.04813	2.22978	12.8816	9.22676	0.191465	25.8874	4.29795	0.424242	6.7264	0
LOC_Os11g47310	receptor kinase-like protein, identical, putative, expressed	5.42667	9.37	2.99333	4.50667	7.95	8.67	3.13029	0.916955	0.704687	0	0.171008	0	0.699414	0.450749	1.5689	0	0	0	0
LOC_Os06g37670	S-locus-like receptor protein kinase, putative, expressed	5.62333	4.99333	2.44	6.26667	4.75333	4.82667	2.04645	0.984807	0.875306	0	0.710318	1.34798	1.27575	0.487522	4.57567	0.543852	0.419833	1.25291	0.552821
LOC_Os05g40180	serine/threonine-protein kinase stt7, chloroplast precursor, putative, expressed	8.80667	5.62667	1.12333	9.08	5.88333	5.71667	5.0089	1.02915	34.6748	16.6388	15.6812	2.29375	6.0091	0.50111	4.82307	2.88297	0	0	0.0907154
LOC_Os04g23890	AGC_PVPK_like_kin82y.10 - ACG kinases include homologs to PKA, PKG and PKC, expressed	6.85	6.61333	2.68333	8.22	7.61667	5.50333	2.4646	1.38401	89.6591	30.4762	59.9419	1.61252	7.34156	1.02216	5.18849	0.29428	0	0.287755	0
LOC_Os09g27010	tyrosine protein kinase domain containing protein, putative, expressed	7.21	20.31	9.65	7.43333	22.9133	17.2333	2.10466	1.32959	4.75382	57.8496	15.4588	0.681095	26.7742	2.95204	2.70509	1.4555	1.01789	0.358764	0.704368
LOC_Os02g13510	receptor-like protein kinase 5 precursor, putative, expressed	1.18333	6.47667	1.29667	0.583333	7.77	7.91	4.99486	0.982301	33.2931	7.05471	6.73478	0.40007	8.3579	4.88085	0.868007	0.392535	0.0720805	0.0812544	0
LOC_Os03g10500	adenylyl-sulfate kinase, putative, expressed	21.9533	111.697	35.4333	29.8233	114.21	83.51	3.1523	1.36762	10.6069	7.4617	11.1315	9.49593	8.56297	5.22339	8.03591	6.88813	0.341675	2.18091	0
LOC_Os05g41270	CAMK_CAMK_like.4 - CAMK includes calcium/calmodulin depedent protein kinases, expressed	9.61333	14.2367	5.69667	15.0467	25.0167	21.36	2.49912	1.17119	0	0	0.123595	3.91012	8.93941	111.121	0.350436	0	0	0	0
LOC_Os01g63220	kinase, pfkB family, putative, expressed	19.54	12.98	6.32667	21.68	14.4867	14.51	2.05163	0.998392	7.50509	8.14599	13.6917	5.08653	4.58624	0.30826	17.2003	2.77482	1.16136	8.73394	1.02676
LOC_Os01g73450	amino acid kinase, putative, expressed	74.4167	83.6833	33.6067	66.1267	72.0467	54.8367	2.49008	1.31384	162.933	36.6031	148.034	33.1801	72.988	20.0873	26.887	8.08283	0.774015	12.1261	0.388161
LOC_Os07g08750	STE_PAK_Ste20_Slob_Wnk.1 - STE kinases include homologs to sterile 7, sterile 11 and sterile 20 from yeast, expressed	89.88	11.55	3.65	86.0667	11.0467	11.12	3.16438	0.993405	8.58398	11.5855	4.47908	1.95752	16.0778	57.0683	85.2693	2.11026	0.826465	0.573127	0.766311
LOC_Os03g14654	LTPL108 - Protease inhibitor/seed storage/LTP family protein precursor, expressed	0.02	16.4533	3.41667	0.133333	5.36333	3.76333	4.81561	1.42516	80.8752	330.793	303.197	0	9.34703	0	0	0	0	0	0
LOC_Os06g45920	ZmEBE-1 protein, putative, expressed	0.933333	4.75	1.8	1.26	2.57	4.76333	2.63889	0.539538	0	0	0	0	0	0	0	2.65441	0	0	0
LOC_Os02g49555	expressed protein	7.61333	5.24333	1.87	6.57667	5.34	3.60333	2.80392	1.48196	0.306903	0	0.545534	0	0.167774	0	0.381509	0	0	0.425198	0
LOC_Os12g04320	sulfotransferase domain containing protein, expressed	2.96	7.68333	1.72	11.0167	10.07	7.19	4.46705	1.40056	0	0	0	1.12566	1.25769	0	0.495482	0	0	0	0
LOC_Os02g09290	cytochrome P450 71D10, putative, expressed	0.603333	4.86333	0.643333	0.286667	4.97667	3.82667	7.55959	1.30052	0	0	0.0426419	0	0	0	0.935439	4.99297	9.28884	0	2.24533
LOC_Os02g08470	expressed protein	5.83	11.1633	2.56333	5.53	9.11667	6.27	4.35501	1.45401	0	0	0.142393	0	0	0	0.943831	0	0	0	0
LOC_Os10g38110	cytochrome P450, putative, expressed	14.5067	9.35333	4.71	18.9567	22.6467	15.9867	1.98585	1.4166	200.799	37.2191	88.6999	0.277344	16.9458	0	1.23356	0.96182	0.811543	0	1.1928
LOC_Os06g29700	OsFBD11 - F-box and FBD domain containing protein, expressed	1.09667	5.65667	2.37	1.27333	4.26	3.01333	2.38678	1.41372	0.270838	0	0.493292	2.05023	2.53108	0	1.51538	1.77152	0	0.659941	0
LOC_Os01g21990	CRS2-associated factor 2, chloroplast precursor, putative, expressed	3.66333	5.57667	1.96667	4.03333	4.66667	3.64333	2.83559	1.28088	16.1941	1.85812	13.7105	1.95058	5.75403	0	1.65421	0.479002	0	2.01036	0
LOC_Os01g65150	proton-dependent oligopeptide transport, putative, expressed	3.01667	13.7167	6.02333	1.98333	12.24	8.83333	2.27726	1.38566	0.205714	0	0.430119	0.384745	3.84618	0	1.71791	0	0	0	0
LOC_Os03g31630	OsSub29 - Putative Subtilisin homologue, expressed	9.85	54.0967	21.1933	21.67	70.5333	61.85	2.55253	1.14039	0	0	0.276579	0	0	0	1.75016	13.4247	0	0	0
LOC_Os06g40070	NADP-dependent oxidoreductase, putative, expressed	4.15667	8.26667	3.26	3.10667	7.81667	5.21667	2.53579	1.4984	0	0	0.153013	0	0	0	1.82296	0.905543	0	0	1.58181
LOC_Os06g02210	bark storage protein A precursor, putative, expressed	6.54667	3.21	0.86	3.80667	1.85	1.25667	3.73256	1.47215	3.23712	59.9465	13.8837	6.10668	2.9508	0	2.01226	0.673497	0	0	0
LOC_Os01g12220	uncharacterized protein family UPF0016 domain containing protein, expressed	7.30333	6.75	2.19333	8.78667	8.21	7.98667	3.07751	1.02796	13.1339	23.9686	42.8031	1.45612	2.49882	0	2.03213	0	0	0	0
LOC_Os02g27070	PPR repeat domain containing protein, putative, expressed	2.05333	3.99	1.56333	2.60667	3.59333	3.42667	2.55224	1.04864	3.90996	4.1699	6.55201	1.94003	3.38623	0	2.12251	0.808237	0	0.721069	0
LOC_Os02g21009	sodium/calcium exchanger protein, putative, expressed	10.5933	3.74667	1.72667	9.39667	2.44333	3.74	2.16988	0.653298	23.2757	0	4.99929	0.246688	0.643891	0	2.12566	0	0	0	0
LOC_Os05g45920	S1 RNA binding domain containing protein, expressed	6.43333	7.41333	3.01667	5.99667	9.17	7.43667	2.45746	1.23308	8.1404	8.99442	16.5	2.85906	4.15388	0	2.18492	1.74387	0	1.68853	0
LOC_Os07g48330	cytochrome P450, putative, expressed	1.34	30.0567	6.23	2.43	33.6433	26.09	4.82451	1.28951	0.728878	0	1.76523	1.5011	15.5712	0	2.39078	1.72758	0	0	0
LOC_Os02g51570	peptidyl-prolyl cis-trans isomerase, FKBP-type, putative, expressed	10.72	10.13	2.98667	11.82	12.2033	11.6633	3.39174	1.0463	38.9059	45.0116	65.3899	2.28033	16.4004	0	3.22466	2.45439	0	0	0
LOC_Os09g30270	transposon protein, putative, Mutator sub-class, expressed	8.36333	7.49	3.97333	7.81333	10.5367	7.65	1.88507	1.37734	0.773358	2.99951	0.903515	3.371	1.66583	0	3.53616	0	0.193873	1.97105	0
LOC_Os03g61030	transcription termination factor nusG family protein, expressed	13.0667	16.25	7.25333	12.2067	11.7033	11.87	2.24035	0.985959	10.9338	8.61721	23.8214	3.4443	2.67528	0	3.69952	2.63065	0	2.56141	0
LOC_Os05g42100	expressed protein	4.75333	6.22	1.75333	4.76333	4.32	4.92667	3.54753	0.876861	5.65524	5.63388	5.16649	1.61788	6.33298	0	3.78916	1.43726	0	0	0
LOC_Os05g49920	pentatricopeptide, putative, expressed	4.45	7.31667	3.18333	5.74667	7.58	8.03	2.29843	0.94396	2.42242	3.27312	4.75142	2.28434	4.2394	0	4.17138	0.648952	0.187746	1.93405	0
LOC_Os05g25630	inhibitor I family protein, putative, expressed	31.4033	130.313	41.4667	30.76	117.807	121.577	3.1426	0.968991	0	0	0	0	0	0	4.5617	13.0681	0	0	0
LOC_Os03g21780	pentatricopeptide repeat domain containing protein, putative, expressed	2.36667	2.33333	0.936667	2.82	2.20667	2.33	2.4911	0.947067	5.79627	3.06783	8.77247	2.08429	4.00556	0	4.67066	3.80356	11.5543	34.0048	6.51188
LOC_Os03g31150	expressed protein	10.4967	9.98	3.29333	11.57	9.37333	9.69	3.03036	0.96732	20.448	12.123	23.1715	3.61035	7.95568	0	4.75538	1.7227	0.151117	2.97178	0
LOC_Os03g09060	prenyltransferase, putative, expressed	7.08	8.42667	3.45	8.03667	10.09	10.0167	2.44251	1.00732	12.9182	59.0249	24.9288	5.41348	5.36444	0	4.96713	2.45321	0.943588	11.8141	0.548971
LOC_Os07g29410	thioredoxin, putative, expressed	9.87667	11.44	3.56	8.54667	8.97333	6.83667	3.21348	1.31253	439.624	33.0186	573.924	11.1742	78.4165	0	5.06269	4.4085	0	3.10012	0
LOC_Os10g27120	expressed protein	10.1067	15.2667	4.50667	8.69	20.1433	13.6467	3.38757	1.47606	0	2.16305	1.00255	10.1587	4.20702	0	5.46903	1.11879	0	0	0
LOC_Os04g22300	expressed protein	27.9933	18.4333	8.08667	26.62	34.5367	28.0633	2.27947	1.23067	2.17061	1.92773	3.72485	1.42432	2.89409	0	5.55519	5.31527	0	0	0
LOC_Os05g03750	expressed protein	11.0533	5.99333	1.85667	10.7867	8.29	8.02333	3.22801	1.03324	23.35	25.7833	11.4544	1.61069	22.8065	0	6.41873	2.85949	0	0	0
LOC_Os02g03570	hsp20/alpha crystallin family protein, putative, expressed	2.81333	5.01	0.863333	1.97667	3.21	2.51	5.80309	1.27888	8.80154	1.08061	4.25233	6.21592	48.7134	0	7.08051	1.56649	0	1.0665	0
LOC_Os07g48650	OsSub54 - Putative Subtilisin homologue, expressed	4.90333	3.72667	1.49	6.01333	4.38667	5.32333	2.50112	0.824045	0	0	0.387042	0	0.276406	0	7.35891	0	0	0	0
LOC_Os04g54320	expressed protein	12.5567	8.90667	2.88	15.7367	18.68	16.73	3.09259	1.11656	25.9164	22.5708	10.2804	1.87481	11.2805	0	8.0068	1.99785	0	0.508279	0.46448
LOC_Os04g32850	basic proline-rich protein, putative, expressed	10.8567	9.91	3.04667	15.2167	12.5433	13.5433	3.25274	0.926163	90.8221	130.193	202.138	0.764431	202.342	0	8.67872	33.2741	0	0	0
LOC_Os08g03410	glutelin, putative, expressed	31.14	241.823	97.5267	144.42	458.047	507.083	2.47956	0.903297	0	0	0.292847	0	0	0	8.95617	332.301	687.211	36316.4	978.163
LOC_Os01g71330	expressed protein	14.61	12.6767	2.74333	14.4267	18.81	13.2133	4.6209	1.42356	20.0855	15.4768	22.7573	2.20144	7.32471	0	9.1357	3.97787	0	0	0
LOC_Os02g57010	RNA recognition motif containing protein, putative, expressed	16.1933	18.1267	7.81333	17.3	21.3133	21.2133	2.31997	1.00471	27.1043	17.6611	50.7279	7.05938	13.1925	0	10.9885	5.13837	0	0.787212	0
LOC_Os01g18744	transferase family protein, putative, expressed	55.09	104.18	25.08	101.09	132.633	141.907	4.15391	0.934652	3.09965	14.2051	15.5122	5.4449	179.784	0	12.1521	10.7227	0	0	0
LOC_Os10g42850	WRKY2, expressed	10.3133	3.79	0.766667	4.41667	3.71	3.44667	4.94348	1.0764	0.300665	0	0.149006	9.18819	10.2716	0	12.2767	0	0	0	0
LOC_Os03g22510	expressed protein	20.93	13.1367	2.80667	18.8667	13.17	10.8367	4.68052	1.21532	0.84437	6.50999	2.28298	5.43906	3.61716	0	12.5432	4.58283	0	1.76502	0
LOC_Os01g73540	YGGT family protein, putative, expressed	9.72667	6.13	1.61667	10.6733	12.59	10.8267	3.79175	1.16287	40.3428	27.3728	25.4283	2.29008	18.2968	0	17.2861	4.07914	0	0	0
LOC_Os06g04150	magnesium-protoporphyrin O-methyltransferase, putative, expressed	17.24	21.3033	9.57333	19.1367	21.1967	18.4833	2.22528	1.1468	106.463	24.1617	99.101	31.7231	36.5171	0	20.5063	18.0361	0	0	0
LOC_Os11g34110	heparan-alpha-glucosaminide N-acetyltransferase, putative, expressed	187.32	141.14	24.9033	231.19	139.91	104.753	5.66751	1.33561	26.5243	1.66263	16.2653	0	1.76177	0	23.7388	0	0	0	0
LOC_Os06g49830	SHI, putative, expressed	17.18	16.7267	6.12333	19.7367	12.44	13.7233	2.73163	0.906485	0	0	0.147503	11.8272	6.39362	0	30.2954	0.693273	0	2.21598	0
LOC_Os08g04560	decarboxylase, putative, expressed	15.42	2.28667	0.48	15.1233	1.63333	1.22667	4.76389	1.33152	2.16275	1.50609	1.04062	1.82587	10.9527	0	39.2504	0	0	0.673019	0
LOC_Os01g72470	expressed protein	175.603	78.5467	35.7933	136.813	97.67	68.5733	2.19445	1.42431	0	0	0	0.633914	3.50985	0	66.8633	38.6477	0	3.03927	0
LOC_Os08g12410	pectinesterase, putative, expressed	164.067	68.61	25.5367	134.91	30.22	20.8067	2.68672	1.45242	0	0	0	19.6562	38.6738	0	140.935	1.59634	0	0	0
LOC_Os01g66000	NADH dehydrogenase I subunit N, putative, expressed	3.11333	4.08	0.77	3.75333	8.72667	7.01333	5.2987	1.2443	49.2221	45.0552	55.6218	1.07713	9.90082	0.0826954	5.39632	2.42114	0	0	0.0390279
LOC_Os04g43420	PTAC5, putative, expressed	6.42333	9.31	2.27	7.77	10.3033	6.95	4.10132	1.48249	28.566	2.85286	43.0271	1.95042	7.0532	0.113285	3.46779	1.25613	0	0.954845	0
LOC_Os12g08550	expressed protein	2.21	3.12667	1.27	2.07333	3.23	2.21333	2.46194	1.45934	0.0604927	0.166233	0.0478394	0.0577725	0.0352233	0.115947	0.220334	0.21749	0.157611	0.00409027	0.148871
LOC_Os03g08290	expressed protein	5.61333	4.37	0.836667	5.93	7.71	5.31667	5.22311	1.45016	0.0190158	0.015751	0.161846	0.147352	0.0144436	0.123489	0.90888	0.670159	0.0131876	0.00221631	0
LOC_Os11g34130	expressed protein	2.99	11.7133	5.1	3.67667	8.37333	11.75	2.29673	0.712624	1.84412	26.7932	11.1325	3.80411	6.25216	0.139123	3.99733	1.34147	0.00405411	0.139193	0.127924
LOC_Os08g25250	retrotransposon protein, putative, unclassified, expressed	17.8033	14.41	7.23333	14.5467	18.6033	13.2367	1.99217	1.40544	2.26853	1.2379	0.450952	0.798805	0.77407	0.15226	1.81673	0.484997	0.786605	1.5415	0
LOC_Os07g07620	pentatricopeptide, putative, expressed	2.93	2.82333	1.15	2.53667	2.77333	2.81	2.45507	0.986951	5.39154	1.25815	5.72656	2.4623	3.09193	0.153174	2.77083	1.83633	0.686489	3.50146	0.336589
LOC_Os01g70460	expressed protein	12.7467	11.1033	4.59667	14.12	17.32	16.2667	2.41552	1.06475	9.52594	26.9645	14.6409	5.08092	5.75379	0.171782	5.80566	4.20515	0	4.41088	0
LOC_Os10g04050	transposon protein, putative, CACTA, En/Spm sub-class, expressed	19.5367	9.21	4.79333	18.7867	20.79	21.9267	1.92142	0.948161	7.43688	20.1369	2.69604	1.76594	2.31255	0.195833	2.64785	0.945515	0.596301	4.48287	0.115505
LOC_Os06g01850	ferredoxin--NADP reductase, chloroplast precursor, putative, expressed	25.7567	36.66	14.6633	29.2067	33.0233	47.4167	2.50011	0.69645	355.378	192.338	592.087	9.04175	84.1952	0.201118	18.9662	4.71237	0	0	0
LOC_Os01g65169	proton-dependent oligopeptide transport, putative, expressed	1.47	11.8	3.25333	0.716667	9.28667	6.70333	3.62705	1.38538	0.653115	0	1.62078	0.196744	21.8027	0.207025	0.936662	2.5326	0	0.546134	0
LOC_Os07g40690	NAD dependent epimerase/dehydratase family protein, putative, expressed	0.57	2.61667	0.4	1.54	12.0733	8.80333	6.54167	1.37145	4.1702	28.783	39.958	12.3844	29.7762	0.245073	1.5245	0	0	0	0
LOC_Os05g30700	expressed protein	9.54	4.06333	1.21333	13.0233	7.5	6.31	3.3489	1.18859	2.00129	3.89349	3.32449	2.6343	4.28606	0.253456	8.64478	2.00736	0	0.328189	0
LOC_Os04g49250	UDP-glucose/GDP-mannose dehydrogenase family, central domain containing protein, expressed	9.45333	19.65	3.44667	10.1233	13.6667	16.6467	5.70116	0.820985	0.120636	0	0.378239	1.85353	1.72648	0.259424	3.40024	0.575873	0.323543	0.849396	0.857108
LOC_Os04g44340	expressed protein	9.77667	5.34	1.36	9.33667	9.96667	7.02333	3.92647	1.41908	36.2915	17.2641	58.8645	0.492475	5.87433	0.28032	3.64549	1.90987	0	0	0
LOC_Os09g31502	dehydrogenase, putative, expressed	7.97333	8.82333	3.63	7.34667	9.83333	10.3967	2.43067	0.945816	76.9557	5.39398	24.1102	5.80246	9.8477	0.298665	9.01766	4.9745	0	0.360803	0
LOC_Os04g38400	ethylene-insensitive 3, putative, expressed	15.9067	3.68333	0.84	3.32667	0.743333	0.543333	4.38492	1.3681	0	0	0.303758	3.25897	0.917716	0.311504	1.84987	0.898755	0.702769	2.1758	0
LOC_Os03g03990	signal recognition particle 43 kDa protein, chloroplast precursor, putative, expressed	8.74667	11.09	3.60333	10.8133	12.35	10.45	3.07771	1.18182	43.344	12.4812	31.0667	13.7078	18.58	0.333723	11.5846	4.92761	0	0	0
LOC_Os07g06450	RNA recognition motif containing protein, putative, expressed	15.8733	21.9067	7.69667	18.3967	19.98	23.1633	2.84625	0.86257	52.2758	39.2492	30.8219	4.5313	19.8324	0.335342	10.1497	8.27885	0.449485	0.984439	0
LOC_Os04g49230	B3 DNA binding domain containing protein, expressed	13.07	8.64333	2.7	14.9567	8.20333	7.03333	3.20123	1.16635	1.02588	2.0078	1.26401	3.58984	3.25824	0.33626	12.2943	2.54058	0.862097	1.34662	0.492549
LOC_Os05g01120	cytochrome P450, putative, expressed	19.33	4.47333	2.05333	12.97	4.99	4.07	2.17857	1.22604	1.866	4.93035	4.01483	12.6194	12.6444	0.344444	13.8296	1.83099	0	1.42089	0
LOC_Os01g14550	pathogen-related protein, putative, expressed	14.35	9.81667	4.07667	13.8767	9.20667	6.42667	2.40801	1.43257	0.859063	4.38988	1.1921	0.700021	2.26017	0.365315	11.624	4.51892	0	0	0
LOC_Os03g39650	cytochrome P450, putative, expressed	3.88333	9.85	3.78	4.89	15.18	11.5867	2.60582	1.31013	0.221514	0	2.87993	0	0.939802	0.371306	0.512648	6.11904	0	0	0
LOC_Os11g44380	expressed protein	0.863333	10.54	3.34	0.903333	8.35667	6.05333	3.15569	1.38051	3.56583	1.64116	2.47476	0	0.413272	0.386542	0	0.538582	0	0	0
LOC_Os04g34460	PAP fibrillin family domain containing protein, expressed	14.54	9.32667	3.45	14.9367	14.65	11.3233	2.70338	1.29379	30.9505	30.4436	16.0794	4.72907	13.0766	0.405388	8.07482	3.39511	0	0.851631	0
LOC_Os12g26850	retrotransposon protein, putative, unclassified, expressed	2.96667	3.05667	1.36333	2.98333	3.26333	3.26	2.24205	1.00102	3.76547	6.8058	4.83195	1.401	0.982964	0.4063	1.11122	0.57011	0.0657456	1.91977	0.0279608
LOC_Os07g48690	DUF630/DUF632 domains containing protein, putative, expressed	12.84	25.95	12.25	12.48	34.7567	25.3033	2.11837	1.3736	5.96461	11.1195	5.14749	4.31016	4.85427	0.412829	4.92458	2.26192	0.559244	4.0572	0.095224
LOC_Os08g37700	RNA recognition motif containing protein, putative, expressed	26.9833	22.13	10.6133	25.98	28.8533	23.4867	2.08511	1.2285	35.6061	15.0408	15.4063	7.1099	12.8307	0.429638	6.72471	1.14049	0.393309	3.27723	0
LOC_Os05g50950	pentatricopeptide repeat protein PPR986-12, putative, expressed	8.47	5.71667	2.65333	8.6	7.77333	8.05333	2.15452	0.965232	7.57435	5.09691	5.81286	2.85823	4.52511	0.43292	8.06177	2.27888	0.726388	3.7278	0.119677
LOC_Os05g04070	expressed protein	10.6533	11.5267	5.50333	11.01	15.02	11.73	2.09449	1.28048	18.3776	16.9851	4.82507	3.43743	5.65752	0.436524	7.0508	3.58767	0.324945	3.28143	0
LOC_Os04g46010	PPR repeat domain containing protein, putative, expressed	7.22	10.2733	4.60667	10.0033	9.93	7.92333	2.2301	1.25326	32.4588	18.763	40.7754	5.72832	12.2396	0.44482	7.40975	6.86891	2.63452	1.68914	0.701642
LOC_Os04g54640	peptidase, cysteine peptidase active site, putative, expressed	16.07	5.1	1.77333	15.49	7.95667	8.84333	2.87594	0.899736	42.2396	23.5505	45.344	1.49764	7.80279	0.463866	5.66649	2.87958	0	0.970633	0
LOC_Os10g34083	expressed protein	21.41	17.7467	6.21	20.1	22.7333	19.5333	2.85776	1.16382	13.2762	9.52807	5.70004	4.13692	4.74486	0.471493	7.67085	2.83847	1.58219	3.74872	0.293737
LOC_Os05g04820	MYB family transcription factor, putative, expressed	4.40667	4.86	3.14	3.41667	4.84	3.92667	1.54777	1.2326	0.76037	25.6974	9.41347	24.6649	7.38655	0.480807	8.35818	3.90949	0.310014	0.609909	0.281884
LOC_Os12g17320	polyprenyl synthetase, putative, expressed	9.95	5.20333	2.05667	11.63	7.92	5.61333	2.52998	1.41093	77.8415	22.8054	57.5265	3.89617	6.54879	0.485685	6.78023	5.03894	0.428842	0.690909	0
LOC_Os06g45340	peptidyl-prolyl cis-trans isomerase, FKBP-type, putative, expressed	30.1133	18.4167	5.13333	30.29	31.5267	31.7467	3.58766	0.99307	50.3278	33.3669	44.8629	6.91176	31.0986	0.525419	23.2545	16.1292	0	0	0
LOC_Os06g02500	superoxide dismutase, chloroplast, putative, expressed	48.6067	47.63	22.0433	50.0767	45.5067	49.1933	2.16074	0.925058	23.6487	60.2815	18.7811	14.4465	11.3237	0.528364	31.3227	13.6477	3.23633	14.4448	1.06929
LOC_Os08g04450	DAG protein, chloroplast precursor, putative, expressed	34.78	56.53	22.9433	37.5233	48.1267	44.82	2.4639	1.07378	61.6138	39.7758	62.4265	19.9441	34.78	0.534215	27.1762	12.5171	1.61088	5.41161	0
LOC_Os05g40212	expressed protein	16.8367	12.63	5.36333	13.6033	19.38	15.4433	2.35488	1.25491	4.50699	4.3257	5.03508	3.01516	3.80444	0.576633	9.3095	3.42192	0	1.61405	0
LOC_Os03g18020	rhodanese-like family protein, putative, expressed	10.0467	12.8367	4.18	12.68	14.2267	14.0467	3.07097	1.01281	22.8895	21.609	22.0955	6.10791	13.4447	0.589646	8.96846	4.62974	0	0	0
LOC_Os11g31190	nodulin MtN3 family protein, putative, expressed	36.5733	63.4533	23.7667	38.2533	54.5367	42.8533	2.66985	1.27264	0.717668	4.33501	3.02121	0.425835	5.01897	0.611933	27.9852	39.4217	13.4468	5.98169	9.47473
LOC_Os07g12640	glycerol-3-phosphate dehydrogenase, putative, expressed	5.85333	6.61667	2.64333	5.96333	8.44333	6.29667	2.50315	1.34092	4.96434	7.57865	4.92961	1.42679	2.68064	0.615167	3.74671	1.08738	0.726938	2.75776	0.192715
LOC_Os10g10170	PPR repeat domain containing protein, putative, expressed	13.0333	11.46	4.69333	15.32	16.3267	14.58	2.44176	1.1198	66.7318	95.1499	63.8753	4.70709	15.8987	0.619336	5.14337	4.01818	0.278439	7.66082	0.073778
LOC_Os11g32500	rubredoxin family protein, putative, expressed	29.0933	24.46	9.99	33.9	30.77	30.21	2.44845	1.01854	26.2411	126.347	70.344	11.4098	19.1692	0.622714	25.0198	15.5144	0.864968	3.43319	0
LOC_Os03g53640	expressed protein	18.4833	13.55	3.96	20.6133	24.93	17.0133	3.42172	1.46532	18.2431	25.5779	15.9011	3.97263	16.4325	0.627862	10.153	4.22081	0.656193	0	1.80893
LOC_Os12g30040	transmembrane amino acid transporter protein, putative, expressed	7.04667	14.83	6.12333	5.82667	7.9	10.36	2.42188	0.762548	0	1.40929	1.43844	15.771	8.28617	0.633376	13.2544	13.3823	0.69475	11.2232	0.520832
LOC_Os07g17184	expressed protein	27.2133	12.9167	4.95333	15.8733	20.6633	13.85	2.60767	1.49194	20.5695	11.1219	5.13905	3.63808	11.6507	0.633826	15.3605	2.58455	0.668415	3.11619	0
LOC_Os02g15660	tetratricopeptide repeat, putative, expressed	5.65333	6.00667	2.50667	8.05667	9.37333	8.97667	2.39628	1.04419	81.712	73.0209	89.3329	8.89266	14.1923	0.655104	4.80339	5.17821	0.449219	2.55638	0.188638
LOC_Os07g33660	expressed protein	63.1667	60.8067	29.06	56.5367	76.6467	67.2867	2.09245	1.13911	46.9347	61.5781	65.187	16.4173	44.1687	0.672397	40.5267	11.7534	0	5.40678	0
LOC_Os02g56940	expressed protein	24.6167	20.4733	7.52	24.3433	27.8567	24.7933	2.72252	1.12355	32.7091	24.1089	12.5818	8.72498	17.8286	0.675434	23.2916	8.29766	1.34957	4.63729	0.254757
LOC_Os06g02580	high-affinity nickel-transport family protein, putative, expressed	6.28	13.0767	4.92	7.84333	11.3633	9.88667	2.65786	1.14936	35.4544	7.39231	27.2723	6.26461	11.1868	0.677982	10.0822	8.4281	1.22326	5.64896	0.55489
LOC_Os02g45850	B3 DNA binding domain containing protein, expressed	4.16333	4.15667	1.48	3.79	4.35	3.82	2.80856	1.13874	0.3071	0.511401	0.659506	2.34074	2.2634	0.682534	12.3832	0	0	1.0332	0
LOC_Os05g33280	thylakoid lumen protein, putative, expressed	20.9433	14.0367	3.38	19.3267	29.49	21.07	4.15286	1.39962	232.031	49.9821	169.918	14.3467	70.7395	0.706027	30.2139	17.9963	0	0	0
LOC_Os01g25600	tetratricopeptide repeat domain containing protein, expressed	8.93667	9.45667	4.04667	9.14	9.79	9.95333	2.3369	0.98359	27.0623	16.1176	16.8386	2.95323	7.88154	0.718915	4.0033	2.42198	0	0.651852	0.32573
LOC_Os08g29370	peptidyl-prolyl cis-trans isomerase, chloroplast precursor, putative, expressed	18.6267	13.87	5.09	18.53	14.9033	11.2467	2.72495	1.32513	103.627	71.7292	92.8374	19.5673	32.453	0.720809	14.6307	9.39761	1.05722	0.683875	0
LOC_Os03g50080	peptidyl-prolyl cis-trans isomerase, FKBP-type, putative, expressed	24.5567	16.67	7.40333	25.3233	24.2333	26.5367	2.25169	0.913202	24.9045	37.9097	41.0301	5.57242	45.6277	0.763351	23.676	16.279	0	0.67452	0
LOC_Os03g45194	oxidoreductase, short chain dehydrogenase/reductase family domain containing protein, expressed	91.04	24.2767	6.33667	108.62	25.9867	20.5533	3.83114	1.26435	6.93809	11.0711	11.8612	2.26451	3.73535	0.767361	39.2144	2.12422	0.645287	2.59769	1.00189
LOC_Os09g10760	RNA recognition motif containing protein, putative, expressed	54.5233	43.1033	18.9367	57.3167	54.8667	53.2133	2.27618	1.03107	58.9381	87.1227	88.0237	28.6358	65.7213	0.771605	40.9769	24.176	0.956355	8.96187	0.283658
LOC_Os10g36530	mutS domain V family protein, expressed	7.09333	8.50667	4.01	7.69	8.85333	8.11333	2.12136	1.09121	8.62532	11.7879	6.58744	2.37352	1.7208	0.785255	2.97068	1.52477	0.925863	2.97733	0.396566
LOC_Os06g45310	OsSPL11 - SBP-box gene family member, expressed	14.78	17.7333	8.66667	13.0667	14.6533	9.91667	2.04615	1.47765	2.25316	4.95868	2.04145	10.5899	6.97725	0.790726	8.99949	3.06534	0.744746	3.31188	0.724
LOC_Os02g45225	expressed protein	7.56333	37.0667	15.89	8.68333	64.0233	44.9	2.3327	1.42591	0.56342	0	0	2.81251	54.4552	0.792377	1.4617	0	0	0	0
LOC_Os08g43410	LRP1, putative, expressed	4.20667	5.21667	2.25	4.82667	5.92667	5.32	2.31852	1.11404	0.165649	0.910142	1.80042	38.4887	10.5095	0.914543	6.33659	1.73334	0	4.633	0
LOC_Os07g10070	retrotransposon protein, putative, unclassified, expressed	2.74333	2.9	1.19333	2.49667	2.99333	2.41	2.43017	1.24205	11.0026	3.21196	9.17084	1.81043	6.13282	0.918598	3.09202	2.17081	0.435828	0.902087	0
LOC_Os04g50110	RNA recognition motif containing protein, putative, expressed	14.18	10.0167	3.10333	16.1233	10.5033	8.66333	3.22771	1.21239	54.321	20.0261	16.5195	4.2738	15.6646	0.935092	5.56204	3.88576	0	1.21081	0
LOC_Os03g62630	ribosomal protein S6, putative, expressed	36.31	35.64	16.68	37.8433	38.84	44.92	2.13669	0.864648	121.57	100.397	174.289	28.8414	79.3688	0.957667	40.7963	29.5427	0.641077	4.91451	0
LOC_Os03g61260	ribosomal L18p/L5e family protein, putative, expressed	99.44	80.2633	39.01	100.86	88.1367	103	2.05751	0.855696	62.5671	256.584	285.729	38.5703	90.4806	0.97001	49.1027	34.7358	0.760021	6.32911	0
LOC_Os07g48640	short-chain dehydrogenase/reductase, putative, expressed	48.6367	20.37	11.9533	50.2533	21.85	15.89	1.70413	1.37508	1.65747	17.1872	2.17927	6.50654	5.87572	0.98477	10.5824	3.9142	0.826946	6.41	0.202807
LOC_Os08g02909	expressed protein	133.117	81.62	22.41	213.243	77.1767	71.6767	3.64212	1.07673	0	0	1.85187	0.552508	21.5119	0.997919	320.676	1.26223	0	0	0.412873
LOC_Os01g28540	stress regulated protein, putative, expressed	21.8067	8.22333	3.29	21.0467	16.0233	14.6867	2.49949	1.09101	23.5155	18.213	8.24854	1.97507	6.48562	1.00252	8.23485	2.03346	0	2.44668	0
LOC_Os05g27590	wound-induced protein WI12, putative, expressed	41.82	66.0767	18.4767	42.5733	79.62	61.7033	3.57622	1.29037	0.425303	1.29953	0.523492	0	5.48496	1.0233	7.46557	0	0	0	0
LOC_Os01g65400	DNA polymerase I, putative, expressed	24.38	19.9433	8.89	27.5367	22.8233	25.2767	2.24334	0.902941	15.1576	11.5954	8.09409	6.9469	8.70117	1.03041	15.8821	4.89925	0.271803	9.28312	0.0895215
LOC_Os07g04230	mTERF domain containing protein, expressed	5.47667	5.58333	2.60333	5.50333	7.74667	6.36	2.14469	1.21803	10.6511	11.8074	16.7289	5.91501	8.7788	1.06855	7.81831	7.3481	1.37893	2.86077	0.943555
LOC_Os08g02939	expressed protein	2485.08	1524.74	434.21	2434.35	1144.44	783.14	3.51153	1.46135	0	0	1.91492	0.588304	22.5132	1.07046	336.001	1.33463	0	0	0.437123
LOC_Os06g15170	3-ketoacyl-CoA synthase, putative, expressed	9.71667	10.79	3.62	11.8233	12.9567	9.12	2.98066	1.42069	7.53325	5.77107	14.5755	2.13277	5.72596	1.08877	8.27517	0.72021	0.354787	0.309367	0.727465
LOC_Os03g19550	retrotransposon protein, putative, unclassified, expressed	44.2033	32.6567	14.4367	34.04	57.7533	43.6633	2.26206	1.3227	0	0.946791	0.325075	5.23308	3.00103	1.11636	84.7918	5.71446	0	2.86473	0
LOC_Os07g23990	tetratricopeptide repeat domain containing protein, putative, expressed	14.7433	16.5333	5.27667	18.4367	16.7567	14.07	3.13329	1.19095	47.0023	25.3009	38.9156	8.36956	9.02176	1.15854	6.4164	2.44907	0.477988	2.57523	0.130574
LOC_Os04g01140	cytochrome P450 93A2, putative, expressed	2.02333	5.27667	1.68667	1.53	4.68333	3.89333	3.12846	1.20291	7.8137	25.5646	62.9147	15.9529	161.711	1.16996	14.4517	1.57879	0	3.4625	0
LOC_Os01g03020	tRNA synthetase class I, putative, expressed	14.5267	11.7933	5.46	15.73	14.2733	12.1867	2.15995	1.17123	15.8149	35.9074	25.079	5.51499	4.52356	1.17438	4.45083	2.70785	0.337088	3.68076	0
LOC_Os10g01044	isoflavone reductase, putative, expressed	20.4433	11.66	2.86333	21.4133	15.52	16.78	4.07218	0.924911	145.093	119.771	68.9584	13.0557	45.0466	1.23561	15.1625	8.46808	0	0	0
LOC_Os01g12340	retrotransposon protein, putative, unclassified, expressed	43.7533	26.5067	11.2533	36.09	33.2667	31.0133	2.35545	1.07266	7.14517	7.97295	2.18234	3.60471	2.75024	1.24204	2.29592	1.03361	0.836111	4.94726	0.270021
LOC_Os03g30300	6-phosphogluconolactonase, putative, expressed	60.8467	16.4933	7.51333	57.62	28.2333	20.7533	2.19521	1.36042	0.69718	1.32925	0.656042	8.81716	7.40363	1.25959	37.8015	6.30136	0.585288	11.3861	0
LOC_Os06g28950	expressed protein	20.9367	8.59333	2.17	28.63	18.9433	15.19	3.96006	1.24709	54.7285	26.4256	20.0491	4.33879	14.5944	1.28655	36.2112	9.04105	1.22344	8.05997	0
LOC_Os02g22600	retrotransposon protein, putative, unclassified, expressed	13.0233	14.58	4.4	11.3133	10.7233	8.57333	3.31364	1.25078	2.25151	0.507557	0.689076	2.3213	0	1.29179	2.81928	1.54236	0.921311	2.93355	0
LOC_Os09g16510	WRKY74, expressed	32.4833	29.1267	12.22	27.4133	25.71	26.2933	2.38352	0.977814	65.962	18.781	12.6483	0.802683	3.81008	1.30882	2.66092	1.63872	0	0	0
LOC_Os09g29760	expressed protein	7.01667	12.4733	5.89333	6.87333	11.7733	10.19	2.11652	1.15538	2.94028	0	1.27536	5.28119	6.36642	1.33903	12.6227	6.16153	1.22924	3.64568	0
LOC_Os02g36570	ABC1 family domain containing protein, putative, expressed	24.8367	9.22	4.34667	26.8567	14.56	13.2633	2.12117	1.09776	118.425	54.7381	69.9201	11.4393	6.16915	1.41209	17.8626	8.11207	0.473493	18.9383	0.369947
LOC_Os04g01540	expressed protein	27.4233	20.49	9.25667	32.92	25.9067	22.36	2.21354	1.15862	64.3436	77.8722	70.2998	8.08311	43.1259	1.43056	15.3323	23.9831	2.82164	2.19572	0.409436
LOC_Os08g06530	rubredoxin family protein, putative, expressed	28.2467	22.1767	7.88667	32.3267	24.8367	23.9533	2.81192	1.03688	192.654	84.5079	191.354	3.67192	32.2402	1.58971	14.7157	7.89132	0	0	0
LOC_Os03g17580	ribosomal protein L10, putative, expressed	67.45	29.6233	14.71	62.7333	39.6733	44.8667	2.01382	0.88425	87.549	89.6506	164.076	22.1808	67.5241	1.59654	45.1894	30.2506	0	7.30996	0
LOC_Os02g53350	expressed protein	15.8767	12.81	2.48	18.75	17.3333	13.98	5.16532	1.23987	10.9764	19.3972	33.4215	3.01045	23.8158	1.60917	12.4677	3.29594	0	0	0
LOC_Os01g10950	peptide-N4-asparagine amidase A, putative, expressed	14.2533	24.32	11.2433	17.12	38.0533	29.8567	2.16306	1.27453	22.1677	43.9233	24.7557	35.8406	14.9007	1.66405	28.2109	3.99968	2.30109	2.27223	1.36675
LOC_Os07g43040	heavy metal-associated domain containing protein, expressed	25.5233	20.8233	5.96	27.6267	32.6733	23.67	3.49385	1.38037	14.6908	14.3645	10.147	3.27448	10.3709	1.67726	12.6018	6.25696	0.916338	2.79846	0
LOC_Os07g15430	expressed protein	6.43333	8.20667	3.55333	8.13667	9.92	6.86	2.30957	1.44606	5.9208	4.03167	6.37589	2.13558	5.00201	1.70352	6.06846	2.82906	0.435168	1.09619	0
LOC_Os09g29239	purine permease, putative, expressed	12.2633	9.00333	3.57	12.4333	10.1133	10.0133	2.52194	1.00999	29.8889	11.1681	17.9685	1.97092	10.4653	1.72222	8.72616	15.7978	2.89629	17.3447	5.26714
LOC_Os03g30950	acyl-desaturase, chloroplast precursor, putative, expressed	549.457	309.983	136.64	603.553	314.487	218.54	2.26861	1.43903	0.843263	0	0.418177	29.8876	21.3349	1.72723	665.035	6.24312	0	0	0
LOC_Os07g01480	oxygen evolving enhancer protein 3 domain containing protein, expressed	10.0367	16.75	4.85667	10.74	22.8367	25.89	3.44887	0.882065	18.2661	13.3421	14.2981	18.6515	39.1302	1.73659	13.7743	4.66397	1.239	5.20461	0
LOC_Os01g14770	retrotransposon protein, putative, unclassified, expressed	11.52	7.29667	2.05	7.72667	7.87	5.68333	3.55935	1.38475	10.3191	17.1705	3.90981	4.23278	3.38039	1.78588	2.55569	1.09893	0.96534	5.64606	0.344163
LOC_Os05g18524	expressed protein	9.43667	9.74	4.71667	6.83667	9.37	7.41	2.06502	1.26451	1.55946	4.00127	1.5052	2.55066	3.6511	1.81159	3.10056	2.98461	0.711976	3.83382	0.874688
LOC_Os06g09880	EMB1270, putative, expressed	1.85667	4.62	1.99	2.05667	4.14	4.2	2.32161	0.985714	5.34615	3.57243	11.7071	1.99579	3.66159	1.82023	0.624869	0.303649	0.157162	2.80115	0.058729
LOC_Os08g42850	peptidyl-prolyl cis-trans isomerase, FKBP-type, putative, expressed	18.28	8.28667	2.61333	18.1233	12.3167	10.12	3.17092	1.21706	64.478	64.3316	33.1951	2.93558	9.86924	1.83893	8.33027	4.24935	0	0	0
LOC_Os05g30140	RNA recognition motif containing protein, expressed	18.4533	22.89	10.3533	14.66	13.58	10.3033	2.21088	1.31802	7.63176	9.65232	3.53518	11.3682	5.02712	1.87802	7.4618	10.423	5.01107	14.1733	3.04744
LOC_Os01g05080	thylakoid lumenal protein, putative, expressed	63.04	56.43	12.8533	55.5	49.7	40.3667	4.3903	1.23121	60.0558	52.9051	47.2855	7.5262	20.0414	1.91376	22.3453	6.27467	0	0.823545	0
LOC_Os12g39380	BTBN24 - Bric-a-Brac, Tramtrack, Broad Complex BTB domain with non-phototropic hypocotyl 3 NPH3 domain, expressed	28.2133	17.8467	7.37667	32.39	20.03	19.5133	2.41934	1.02648	26.6048	20.4312	12.5788	23.7433	12.3303	1.9249	29.2991	2.05924	0.159867	8.83233	0.111419
LOC_Os08g07550	hAT dimerisation domain-containing protein, putative, expressed	7.67	17.7533	8.95	7.97	19.7533	15.7967	1.98361	1.25047	2.45951	2.66497	1.26877	4.25518	4.05984	1.94258	8.20541	3.19005	1.28846	4.48785	0.57785
LOC_Os11g36440	amine oxidase, flavin-containing, domain containing protein, expressed	8.05333	10.0167	4.83667	8.88	13.96	9.33	2.07099	1.49625	16.7595	23.374	9.34227	4.57193	5.80809	2.0431	7.34917	3.64188	1.37816	3.81228	0.794416
LOC_Os11g37960	WIP4 - Wound-induced protein precursor, expressed	25.65	453.13	205.693	32.9733	345.703	286.793	2.20294	1.20541	12.4793	8.48436	1.72096	0	3.66157	2.08977	13.3126	4.00493	0	0	0
LOC_Os01g07780	embryo-specific 3, putative, expressed	7.53667	10.23	4.32667	6.38	12.1033	8.57	2.36441	1.41229	32.3505	13.191	40.4911	5.88994	38.4175	2.09069	7.03078	5.54351	0	3.66834	0
LOC_Os09g26190	CBS domain containing protein, expressed	9.90333	7.44667	3.58667	12.09	14.58	11.1567	2.07621	1.30684	19.0307	22.2375	13.1099	4.43808	6.82899	2.13227	8.41254	3.12152	0.429428	11.9155	0.521023
LOC_Os05g10910	expressed protein	489.483	347.65	125.053	534.403	319.04	249.487	2.78001	1.27879	0	0	0	0	0.970685	2.19296	102.886	0	0	0	1.40545
LOC_Os04g59520	anthranilate phosphoribosyltransferase, putative, expressed	44.5533	19.2567	5.71667	33.3267	16.28	11.86	3.36851	1.37268	26.7168	23.6815	22.8581	18.4808	42.5307	2.20306	22.8019	20.6013	4.11947	8.96123	1.84274
LOC_Os02g02550	peptidyl-prolyl cis-trans isomerase, FKBP-type, putative, expressed	4.40667	6.82333	2.13667	5.29	6.57	5.75667	3.19345	1.14129	20.6236	21.8534	20.8392	1.29096	5.47261	2.20355	2.08947	2.2542	0	0.529004	0
LOC_Os08g36630	bifunctional monodehydroascorbate reductase and carbonic anhydrasenectarin-3 precursor, putative, expressed	143.337	96.6867	34.1667	138.773	82.4167	62.1933	2.82985	1.32517	3.78531	40.0977	8.2931	30.4689	9.94593	2.27331	38.8332	9.89701	0.482178	12.76	0.927613
LOC_Os03g16050	fructose-1,6-bisphosphatase, putative, expressed	7.57667	6.22333	2.44	8.2	8.59667	8.56333	2.55055	1.00389	456.063	150.301	420.558	10.1632	92.4594	2.38554	9.27006	19.2698	0	0	0
LOC_Os04g55230	tetratricopeptide repeat domain containing protein, putative, expressed	42.65	29.8967	13.89	42.8467	33.4933	29.1233	2.15239	1.15005	108.025	57.2974	103.412	28.0025	31.5043	2.46189	25.6904	38.8771	155	18.5728	201.631
LOC_Os11g39190	NB-ARC domain containing protein, putative, expressed	11.8767	2.84667	1.16333	14.0167	8.85	8.08	2.44699	1.0953	15.467	23.0609	4.67368	1.4205	8.57994	2.50663	10.3352	0.998693	0.154371	0.929536	0.157
LOC_Os04g55190	SPOC domain containing protein, putative, expressed	9.26333	8.54	4.17333	8.79667	9.57333	7.38	2.04633	1.2972	4.20875	5.88065	1.70925	7.70774	7.12304	2.51883	4.51472	6.69008	5.51229	5.2955	1.6
LOC_Os08g43270	BAG domain-containing protein, putative, expressed	8.18667	22.9567	11.05	11.1033	25.1967	20.5567	2.07753	1.22572	1.6262	44.4638	46.2763	33.0842	126.815	2.58496	4.54191	3.95155	16.007	1.92845	33.1401
LOC_Os09g26370	DUF581 domain containing protein, expressed	62.78	30.5267	10.89	58.05	26.2667	26.62	2.80318	0.986727	24.9378	4.46973	61.2648	5.5755	116.397	2.68197	58.237	5.96449	3.31733	17.8611	3.03877
LOC_Os06g47930	expressed protein	19.82	15.3833	6.73333	16.3767	12.5767	10.61	2.28465	1.18536	9.21579	4.50659	1.78649	1.74647	4.07239	2.76403	4.75319	0	0.248561	1.34702	0
LOC_Os04g48870	nitrilase-associated protein, putative, expressed	22.9	97.37	28.69	33.81	92.1	74.7333	3.39387	1.23238	0	0	4.87948	6.71992	23.37	2.77275	6.19686	31.9064	0	0	0
LOC_Os03g38940	expressed protein	3.65333	8.97667	3.71	3.26333	9.97667	7.17667	2.41959	1.39015	0.777735	6.24276	7.24517	1.32804	3.89182	2.801	1.41709	1.00565	0.33539	0.310402	0
LOC_Os11g05190	phytosulfokines precursor, putative, expressed	47.41	93.31	35.4067	42.17	107.47	84.73	2.63538	1.26838	1.09038	2.81567	3.39171	59.292	29.218	2.82308	39.0374	2.14175	0.482049	9.43432	0.343438
LOC_Os08g02630	photosystem II core complex proteins psbY, chloroplast precursor, putative, expressed	46.2667	44.08	13.3967	48.8433	63.2433	57.1933	3.29037	1.10578	527.532	149.013	633.408	60.1428	169.263	2.8335	39.0629	45.0767	0	0	0
LOC_Os05g45030	calcium homeostasis regulator CHoR1, putative, expressed	40.43	33.8467	7.84667	40.8167	44.56	34.0267	4.31351	1.30956	86.4938	51.4108	46.1285	16.9466	51.2978	2.91543	40.5938	10.2954	4.01798	13.3614	1.95641
LOC_Os03g45710	2Fe-2S iron-sulfur cluster binding domain containing protein, expressed	22.0533	13.3533	5.41333	18.4233	21.2667	22.9267	2.46675	0.927595	43.2969	23.3183	19.3484	15.7528	50.1897	2.98895	35.0074	9.40796	0	4.74456	0
LOC_Os02g18880	calcineurin B, putative, expressed	74.4933	22.34	4.36	76.4067	25.65	21.8167	5.12385	1.17571	0	0	0.921447	1.05421	6.10249	3.18723	31.0681	0	0	3.01538	0
LOC_Os04g59420	expressed protein	14.52	10.2467	2.16	13.4267	9.67667	6.48	4.74383	1.49331	0	14.2614	2.21194	33.1286	8.89443	3.27451	23.3275	2.89056	0	1.29581	0
LOC_Os07g25690	subtilisin N-terminal Region family protein, expressed	425.377	73.72	16.18	479.44	83.0067	80.1967	4.55624	1.03504	0	0	0.610441	0.797101	1.71552	3.30682	178.809	14.2482	60.8482	0	38.828
LOC_Os06g02120	PPR repeat domain containing protein, putative, expressed	11.69	11.1367	4.49	13.02	13.78	12.7167	2.48033	1.08362	17.9094	4.79048	7.09704	4.79921	8.10786	3.32425	6.99978	2.89324	1.00348	1.72752	0.224609
LOC_Os04g16680	fructose-1,6-bisphosphatase, putative, expressed	44.64	16.2533	3.83333	50.4433	30.2867	21.2133	4.24	1.42772	1156.45	339.969	516.254	15.0662	149.469	3.36961	57.8112	58.0066	3.41482	3.2642	0.920344
LOC_Os01g37130	protein phosphatase 2C, putative, expressed	14.8333	14.1567	6.8	14.6133	19.4233	13.2067	2.08186	1.47072	66.4292	17.1031	30.3546	8.12112	18.051	3.36979	12.2487	7.3234	2.54217	16.5262	2.38399
LOC_Os02g13060	expressed protein	51.8133	33.59	12.9933	54.7067	39.74	37.44	2.58517	1.06143	90.7019	34.4333	42.3713	21.1603	423.452	3.45389	72.3822	23.3754	0	0.978429	0
LOC_Os06g22690	bundle sheath defective protein 2, putative, expressed	31.3	42.5867	20.4833	36.68	45.85	45.7267	2.07909	1.0027	67.4316	180.35	133.792	22.2422	58.3325	3.47388	24.251	20.9996	1.13031	5.13086	0
LOC_Os07g05010	helix-loop-helix DNA-binding domain containing protein, expressed	16.6233	10.5433	5.11333	15.9833	13.5133	11.8733	2.06193	1.13812	19.3954	14.2714	4.74411	1.13215	11.0616	3.49033	9.86405	2.11881	0.981262	1.11145	0.563851
LOC_Os09g36990	expressed protein	56.2133	40.6867	18.84	52.62	49.7433	49.2033	2.15959	1.01097	15.4827	45.7518	58.9971	23.5454	31.6627	3.50585	33.7986	38.2204	12.6339	25.9099	6.31189
LOC_Os12g37530	expressed protein	12.4667	10.35	4.62333	14.04	9.56	8.28333	2.23864	1.15412	27.0386	29.8368	44.1481	5.68547	9.21614	3.57086	7.89179	10.2085	4.17628	7.49932	0.581792
LOC_Os12g32750	flavin monooxygenase, putative, expressed	7.77333	3.58333	0.886667	8.39	4.45333	3.25333	4.04135	1.36885	0.278574	0	0.961746	2.4436	5.01812	3.64043	9.53144	0	0	0	0
LOC_Os10g36260	expressed protein	64.86	38.36	15.8367	62.0567	94.4	77.81	2.42223	1.21321	53.4012	54.3784	54.3147	11.8605	32.2097	3.67714	47.2484	11.2342	4.33002	17.5015	1.7239
LOC_Os03g29540	ATP-dependent protease, putative, expressed	13.9933	6.24	2.42667	13.2833	18.41	15.87	2.57143	1.16005	8.47557	6.24363	3.40825	11.8461	31.0691	3.73537	25.7191	12.4122	1.97033	3.88597	1.63196
LOC_Os09g03190	expressed protein	1.07333	26.7567	11.5833	1.76667	13.31	10.2567	2.30993	1.29769	0.178816	4.4939	0.153626	0.155014	4.92131	3.74668	0	1.43338	1.30072	0	10.3563
LOC_Os09g24530	ribulose-1,5 bisphosphate carboxylase/oxygenase large subunit N-methyltransferase, chloroplast precursor, putative, expressed	8.29667	8.34667	3.43	10.4833	10.5267	11.4667	2.43343	0.918023	15.8531	17.8264	48.4064	3.53149	8.64851	3.78658	7.26076	4.10525	0	1.0009	0
LOC_Os10g35460	COBRA, putative, expressed	3.87667	11	3.62333	5.46	16.46	11.08	3.03588	1.48556	5.26996	148.123	7.14137	0	1.72693	3.87594	3.69362	3.56234	1.76742	0.656827	0.896795
LOC_Os10g25570	expressed protein	35.88	30.3733	13.8033	33.5433	47.1	43.7333	2.20043	1.07698	49.7437	88.8715	64.1508	8.55646	41.4583	3.91694	21.0461	13.3674	1.84637	2.53802	5.49665
LOC_Os08g05910	peptide transporter PTR2, putative, expressed	131.417	83.46	33.63	135.917	110.26	104.993	2.48171	1.05016	37.1172	60.3447	41.3073	74.1109	144.533	4.33641	211.619	42.8389	1.73319	18.0801	2.00104
LOC_Os07g42420	3-oxoacyl-synthase, putative, expressed	165.07	157.66	62.1567	241.21	177.337	136.97	2.53649	1.29471	2.96292	8.65005	19.9252	69.5128	67.5232	4.42308	115.81	24.6207	1.76794	17.6111	0.55944
LOC_Os02g22820	expressed protein	24.74	11.24	4.83667	23.31	20.7067	15.2833	2.32391	1.35485	21.3989	2.65824	1.07061	5.74287	5.47346	4.43936	35.6178	7.12782	0.781005	3.53753	0.952063
LOC_Os03g04060	CHIT16 - Chitinase family protein precursor, expressed	33.4467	29.2533	11.3933	27.4133	44.57	48.67	2.56758	0.915759	28.2926	40.0668	3.49213	0	9.58557	4.4785	26.9459	2.4958	0	0	0
LOC_Os08g01120	sulfate transporter, putative, expressed	7.11	15.8	6.74667	8.31333	18.8967	18.62	2.3419	1.01486	1.931	1.35349	3.30917	3.0828	10.6738	4.49542	7.73589	15.3001	0.73131	1.15882	0.376796
LOC_Os01g11460	zinc finger, C3HC4 type domain containing protein, expressed	8.74	38.1267	14.38	8.20333	22.2267	16.83	2.65137	1.32066	0.285591	0	2.00748	3.61853	11.8657	4.64351	107.404	13.1807	0	1.59405	0.814191
LOC_Os07g49330	phospholipase C, putative, expressed	33.7133	34.4733	16.7967	32.1567	35.9433	26.64	2.05239	1.34922	50.2199	136.043	57.3739	62.3027	48.6711	4.74515	28.635	21.5555	17.872	28.6414	41.7535
LOC_Os08g44810	lactate/malate dehydrogenase, putative, expressed	23.3933	18.7267	8.37	26.8333	21.2667	18.18	2.23736	1.16978	42.6485	38.44	34.773	8.36958	21.4964	4.78677	14.1007	8.24624	0.332093	3.70527	0.575137
LOC_Os03g08940	expressed protein	107.347	159.603	54.0067	97.6367	116.89	83.2567	2.95525	1.40397	2.73467	3.32153	1.13739	5.56105	0	4.80271	16.1369	11.3734	2.04428	1.14825	25.4587
LOC_Os01g09620	zinc finger/CCCH transcription factor, putative, expressed	125.043	96.18	45.8933	122.17	199.82	159.34	2.09573	1.25405	15.1868	19.1388	16.4212	26.4844	55.2983	4.84712	227.805	36.7884	6.94851	214.797	5.76767
LOC_Os04g12920	expressed protein	32.41	21.7467	8.45	33.0867	34.4767	28.4867	2.57357	1.21027	60.324	37.7941	71.8922	9.34989	21.2267	4.95295	31.0361	12.1714	11.1975	41.0724	5.25153
LOC_Os08g29780	expressed protein	8.31667	6.17	2.90667	9.23667	6.36	4.88333	2.12271	1.30239	20.0574	13.4383	16.0892	1.95162	6.42294	4.96606	5.59293	3.6364	1.14593	2.93957	0.475743
LOC_Os08g41460	expressed protein	35.45	29.5367	13.3133	36.8333	38.5933	30.3167	2.21858	1.27301	121.832	146.255	91.1946	13.7497	28.1058	5.1379	13.7511	11.7349	1.42086	8.70231	0.596136
LOC_Os03g21040	stress responsive protein, putative, expressed	2395.04	1126.95	225.82	1709.17	933.277	733.797	4.99048	1.27185	14.8981	60.9151	36.8271	762.307	181.724	5.16117	799.632	292.232	60.8515	925.761	67.0314
LOC_Os06g51290	phytoene synthase, chloroplast precursor, putative, expressed	34.4767	15.46	5.81667	34.2433	18.1767	14.8	2.65788	1.22815	159.654	61.7356	151.285	18.5534	36.4893	5.24366	23.5614	10.322	0.456052	2.55682	0
LOC_Os09g23550	dehydrogenase, putative, expressed	39.7033	39.69	11.2567	35.1567	57.9233	44.38	3.52591	1.30517	100.103	13.4557	45.5513	14.4319	58.5779	5.27314	37.8444	9.27233	0	0.295303	0
LOC_Os05g33620	expressed protein	16.4333	8.72333	3.26667	18.4433	12.1733	9.96667	2.67041	1.2214	84.4701	38.6809	35.3143	2.35284	18.5778	5.31152	6.23555	0.33643	0.387489	7.85698	0.681947
LOC_Os08g31980	trehalose-6-phosphate synthase, putative, expressed	37.9	13.57	4.98333	46.9767	26.9667	22.68	2.72308	1.18901	1.07668	9.09109	0.222264	1.98084	4.84206	5.56598	37.1032	1.72301	1.0281	6.47311	0.07168
LOC_Os03g13600	ZOS3-07 - C2H2 zinc finger protein, expressed	17.7267	8.35	3.11333	17.9467	14.4033	12.8767	2.68201	1.11856	9.22092	14.1861	16.983	29.9541	4.62225	5.76053	20.1445	8.91668	1.01497	1.551	0
LOC_Os07g11280	pentatricopeptide containing protein, putative, expressed	4.59	4.36333	1.98	4.62333	5.71	4.25333	2.2037	1.34248	8.63293	5.37035	3.51108	2.67556	3.23647	5.9313	2.25909	1.32768	0.575624	2.82617	0.566323
LOC_Os02g42810	oxidoreductase, short chain dehydrogenase/reductase family domain containing protein, expressed	67.05	20.4933	7.57333	60.9233	45.2767	37.02	2.70599	1.22303	30.6349	64.9942	21.8756	18.7461	11.9348	5.97928	27.8953	7.78555	0.461646	15.7938	0.218149
LOC_Os07g13969	expressed protein	12.1533	4.46333	0.483333	11.6267	8.27333	8.14	9.23448	1.01638	72.8351	70.7466	277.598	3.23616	8.66618	6.24836	8.58959	10.1688	0.93067	2.42602	0
LOC_Os03g63950	plastid-specific 30S ribosomal protein 1, chloroplast precursor, putative, expressed	60.1433	18.1833	6.97	52.2167	34.1733	36.4033	2.6088	0.938742	243.658	181.346	64.0262	23.5599	172.419	6.32955	42.6508	7.64088	0.682122	11.9613	1.34668
LOC_Os11g29140	expressed protein	38.4733	13.4133	4.46667	31.7033	33.29	24.12	3.00299	1.38018	24.98	11.7797	4.62199	15.2705	11.8734	6.49258	59.7537	11.0157	4.45278	7.91919	3.17827
LOC_Os03g17070	ATP synthase B chain, chloroplast precursor, putative, expressed	67.2333	46.06	17.81	61.9967	72.74	55.5833	2.58619	1.30867	981.992	152.574	569.538	25.4764	244.205	6.49347	67.5195	60.135	0	6.52972	0
LOC_Os02g04810	auxin response factor 5, putative, expressed	31.49	42.6067	17.73	39.4233	47.0967	40.09	2.40308	1.17477	2.9501	9.72286	3.54215	3.5615	13.7989	6.5198	18.0447	2.55189	0	1.15388	0
LOC_Os01g09280	myb-related transcription activator, putative, expressed	14.8867	14.2367	5.50667	10.8867	10.4333	7.01	2.58535	1.48835	10.8236	7.86452	3.87035	2.12228	19.0362	6.56771	4.69575	17.9615	6.11559	11.6891	5.44534
LOC_Os04g26550	expressed protein	1274.49	957.173	420.203	1654.38	1086.93	881.883	2.27788	1.23251	0.236209	0	0	3.49033	1.40327	6.92821	162.802	2.01175	0	0	0
LOC_Os07g46852	sex determination protein tasselseed-2, putative, expressed	41.2367	6.08333	1.78	33.3567	5.14	3.9	3.4176	1.31795	45.8881	503.664	3.18015	0.797603	41.8927	7.31667	26.1315	12.4905	0	0	0
LOC_Os03g31026	retrotransposon protein, putative, unclassified, expressed	26.55	20.94	6.39	24.94	30.93	25.6633	3.277	1.20522	49.5748	89.6408	22.0814	18.2442	15.857	7.60095	23.5537	9.60314	5.42088	34.9404	2.82825
LOC_Os05g32474	expressed protein	13.64	5.50667	1.78	13.0667	18.3967	12.4267	3.09363	1.48042	9.08283	17.0085	3.53957	1.33154	2.61645	7.70173	27.9791	5.99327	0.789565	3.5454	0
LOC_Os03g08960	homeobox associated leucine zipper, putative, expressed	163.283	92.15	39.39	157.26	97.75	73.51	2.33943	1.32975	5.49839	18.8597	18.7838	8.51739	18.2929	7.81519	46.6538	12.5526	0.579839	2.23909	0
LOC_Os07g28400	CDGSH iron sulfur domain-containing protein 1, putative, expressed	44.02	42.36	18.4033	48.41	49.11	38.7833	2.30176	1.26627	14.3432	155.766	60.4667	14.4831	20.9331	7.84705	14.4068	11.5823	1.742	1.00106	0
LOC_Os12g42300	potasium efflux antiporter protein, putative, expressed	19.78	7.66	3.77333	23.1567	11.3467	8.48	2.03004	1.33805	40.447	19.9863	24.9385	2.09658	4.4246	7.86303	6.28767	4.71934	0.533525	2.21334	0.218414
LOC_Os03g02900	B3 DNA binding domain containing protein, expressed	7.91	4.67333	1.97333	8.53333	5.63	5.28	2.36824	1.06629	2.10723	3.83829	2.09703	2.27866	2.4521	8.03531	13.3674	0	0	0.905318	0
LOC_Os04g36800	3-oxoacyl-synthase, putative, expressed	17.0733	10.9967	4.14667	19.5633	7.19	9.09333	2.65193	0.790689	8.61	14.5478	38.222	11.0619	28.8377	8.36747	8.6426	7.65596	12.6567	2.52352	21.0993
LOC_Os07g37030	cytochrome b6-f complex iron-sulfur subunit, chloroplast precursor, putative, expressed	75.5667	37.25	13.2167	84.7633	64.42	47.6533	2.81841	1.35185	746.464	171.788	711.736	40.876	189.818	8.41444	62.4061	57.992	0.400102	4.70898	0.821816
LOC_Os06g03930	cytochrome P450 86A1, putative, expressed	66.4233	40.2567	12.92	55.1133	34.9533	29.45	3.11584	1.18687	29.7083	11.9974	12.8124	10.8197	72.5767	9.42434	54.4523	37.5458	0.875308	7.90229	0.595345
LOC_Os03g54170	OsMADS34 - MADS-box family gene with MIKCc type-box, expressed	28.0833	19.8533	8.3	32.55	20.1933	22.2933	2.39197	0.905801	0	0	0.23498	39.2361	23.5234	9.45012	30.016	0.495131	0	0	0
LOC_Os03g55720	cytochrome b6f complex subunit, putative, expressed	146.1	74.22	35.23	155.03	138.397	117.7	2.10673	1.17584	438.404	398.514	806.082	55.7974	263.671	9.65649	134.063	83.75	0	1.31187	0
LOC_Os07g02800	MYB family transcription factor, putative, expressed	40.5567	23.0267	8.99333	44.4533	38.5433	27.8633	2.56042	1.3833	69.126	14.6451	42.2477	13.1873	18.7398	10.0882	64.0721	21.4597	13.5246	44.6424	28.8277
LOC_Os01g19820	universal stress protein domain containing protein, putative, expressed	8.18667	10.53	3.54333	7.72333	9.68333	8.23333	2.97178	1.17611	3.6391	8.74989	0.857329	5.05589	17.3014	10.4291	36.5079	25.7114	6.38064	12.6676	0.620015
LOC_Os10g33990	DUF584 domain containing protein, putative, expressed	47.2233	37.2833	13.3767	45.58	47.1167	38.3033	2.78719	1.23009	9.62875	17.1744	3.79282	11.6424	15.9728	10.7304	40.7348	9.72947	1.84852	1.69	5.21633
LOC_Os01g66890	BTBZ1 - Bric-a-Brac, Tramtrack, and Broad Complex BTB domain with TAZ zinc finger and Calmodulin-binding domains, expressed	5.71	8.53667	3.36667	5.90667	13.6567	12.03	2.53564	1.13522	21.2541	34.5789	17.9235	1.48957	10.7434	10.8268	5.89923	11.9893	8.59123	8.30965	3.38573
LOC_Os01g61680	expressed protein	19.3267	15.2967	7.09	18.3367	20.9133	17.3833	2.1575	1.20307	10.1404	75.039	6.19648	2.21191	7.86183	11.2379	8.54221	5.23308	0	7.73407	0
LOC_Os06g14324	caleosin related protein, putative, expressed	66.4567	41.5767	16.9867	62.5733	68.2933	56.6233	2.44761	1.2061	258.066	88.1524	190.523	19.1713	36.6145	11.3139	21.8584	7.49477	0	2.01972	0
LOC_Os04g31040	violaxanthin de-epoxidase, putative, expressed	6.39667	6.02333	2.80333	7.36333	9.65	8.16667	2.14863	1.18163	33.8839	33.665	18.3759	2.50331	9.59092	11.4482	5.18569	1.96764	0	0.710204	0
LOC_Os11g32320	CCB1, putative, expressed	41.3367	18.7133	8.00667	43.7833	30.7033	20.5533	2.33722	1.49384	99.7971	45.2787	128.381	18.5823	27.5235	11.6568	44.3948	23.5697	2.35818	12.5455	1.24706
LOC_Os03g55970	uncharacterized protein ycf44, putative, expressed	13.4567	11.5467	5.45	17.68	14.49	12.0433	2.11865	1.20316	18.9811	17.4973	10.4105	6.50948	12.2022	12.1635	9.88349	6.39889	6.53577	9.70557	7.10119
LOC_Os02g51470	ATP synthase F1, delta subunit family protein, putative, expressed	80.39	38.91	15.41	83.88	67.8133	51.77	2.52498	1.3099	586.63	164.804	352.775	33.8883	175.662	12.3116	74.7314	57.25	0	1.66681	0
LOC_Os04g41970	endoglucanase, putative, expressed	17.2967	12.8733	6.12	15.9433	16.84	16.3333	2.10349	1.03102	6.24357	13.8468	3.81058	2.18265	4.096	12.4953	8.22376	13.3304	0.98438	9.23628	0
LOC_Os06g46900	phosphosulfolactate synthase-related protein, putative, expressed	49.9567	17.3667	4.17667	39.1833	14.8533	10.6933	4.15802	1.38903	6.27001	2.26184	2.28018	13.7585	18.7166	12.5594	33.6091	43.6354	23.5305	97.846	10.2759
LOC_Os03g29770	EF hand family protein, expressed	103.013	95.9667	33.52	92.79	139.577	95.6167	2.86297	1.45975	59.9305	36.9692	205.354	36.1701	271.798	12.7973	202.052	64.3005	0.869533	7.43685	0
LOC_Os05g46470	expressed protein	2.55667	9.66333	2.55667	2.56333	9.53	13.9267	3.77966	0.684299	6.21289	13.521	3.10976	31.5938	25.6138	12.9816	13.5544	3.01309	1.00602	0.785736	0
LOC_Os04g58570	C2 domain containing protein, putative, expressed	21.5433	15.4567	5.53333	21.09	21.07	18.2567	2.79337	1.1541	9.08376	35.9264	39.2014	11.0856	41.8342	13.0453	38.3802	4.42238	0	0	0.814815
LOC_Os02g18390	expressed protein	18.48	44.15	16.41	17.15	17.5	14.2467	2.69043	1.22836	2.04185	0	2.52131	8.61549	12.7988	13.0517	6.99271	10.9251	1.00269	2.09357	0.481739
LOC_Os05g01950	expressed protein	98.44	41.1867	13.3	97.02	58.8867	62.0933	3.09674	0.948357	323.384	77.1289	159.439	25.9245	146.296	13.7161	68.0084	42.4683	3.43878	21.5513	0.634
LOC_Os12g07110	acyl-CoA synthetase protein, putative, expressed	15.5533	14.9433	7.06667	15.6267	13.8733	11.5367	2.11462	1.20254	68.8995	78.7752	83.1157	9.72285	28.1456	15.3993	13.368	7.69589	1.24958	14.2365	0.685677
LOC_Os08g45070	expressed protein	41.8633	76.9033	37.5533	38.69	53.0467	59.5033	2.04784	0.891491	50.9123	55.8629	64.096	21.6437	66.7391	16.4461	15.9543	13.7903	2.52049	12.9778	2.07616
LOC_Os04g15840	expansin precursor, putative, expressed	68.62	13.1267	4.41333	55.7433	12.8467	8.64333	2.97432	1.48631	1.64389	1.21548	2.06806	0	6.60532	17.2474	161.328	8.61493	0	0	0
LOC_Os05g51590	N-rich protein, putative, expressed	36.2867	48.7467	22.5567	32.25	48.0733	42.8	2.16108	1.12321	54.3511	43.8598	72.516	15.2446	57.1606	17.9953	27.027	41.8138	3.76526	3.80704	3.25451
LOC_Os05g10930	OsGrx_C15 - glutaredoxin subgroup III, expressed	17.91	87.5833	48.2067	11.58	77.5167	55.2967	1.81683	1.40183	6.61035	21.617	35.3966	9.95902	11.1278	18.0042	15.716	20.3394	6.00654	8.47145	19.5458
LOC_Os11g07020	fructose-bisphospate aldolase isozyme, putative, expressed	202.733	72.74	27.2167	209.977	117.083	103.277	2.67263	1.13369	10070.8	1354.17	4002.92	105.542	817.417	18.727	251.976	248.627	4.14689	4.72619	1.48188
LOC_Os07g28610	expressed protein	44.0467	29.0333	12.5467	47.4167	51.12	46.8867	2.31403	1.09029	410.158	188.794	376.575	25.765	60.4318	19.0835	39.4317	31.4061	0	0	0
LOC_Os08g38400	oligopeptide transporter, putative, expressed	214.203	88.33	28.4733	222.21	115.86	95.16	3.1022	1.21753	1.28341	6.03585	3.27181	38.3597	21.3041	19.283	120.782	2.04212	0.121839	0.364542	0.0212873
LOC_Os11g47970	AAA-type ATPase family protein, putative, expressed	160.863	51.2233	14.44	171.193	74.4467	56.6533	3.54732	1.31407	13502.4	1062.15	2163.32	33.687	262.827	19.7521	188.317	146.079	1.26739	2.13647	1.08265
LOC_Os03g62600	ras-related protein, putative, expressed	21.2033	17.85	8.64	20.0433	21.6367	17.4433	2.06597	1.2404	25.7852	21.3428	16.0064	5.43556	28.0557	20.2202	19.3049	15.324	1.26836	1.91556	0
LOC_Os11g06020	homeobox domain containing protein, expressed	53.21	69.07	32.44	57.7167	96.8633	67.7533	2.12916	1.42965	67.4611	15.5003	55.3559	7.14833	87.9457	20.6497	71.2638	36.6118	1.94915	0	0.948263
LOC_Os07g43810	RNA recognition motif containing protein, putative, expressed	121.1	145.857	55.7667	145.607	151.25	143.047	2.61548	1.05735	83.2969	445.715	236.041	41.6359	143.923	20.7995	126.872	44.689	4.72939	5.93479	2.94258
LOC_Os03g36080	expressed protein	8.88	19.9367	8.44667	9.11667	17.82	20.0067	2.3603	0.890703	18.2143	11.496	58.0516	5.96998	54.9806	21.4317	12.4774	10.2815	0	0	1.28683
LOC_Os01g67320	expressed protein	22.25	21.95	7.43667	26.88	25.2567	17.7467	2.95159	1.42318	80.3461	8.23618	10.1064	7.33582	4.92555	22.0042	25.9615	8.04877	0	1.99917	0
LOC_Os01g09800	BTBA1 - Bric-a-Brac,Tramtrack, Broad Complex BTB domain with Ankyrin repeat region, expressed	58.4633	36.5633	12.87	72.93	45.0667	44.9167	2.84097	1.00334	3.12811	19.6794	1.39581	2.5505	18.9322	22.499	86.8431	1.52698	0	3.61493	0
LOC_Os06g04169	hydrolase, alpha/beta fold family domain containing protein, expressed	136.327	110.883	51.0633	148.627	117.923	81.4	2.17149	1.44869	0	13.1123	10.8789	20.1352	23.7595	22.753	76.3751	110.102	3.36669	3.82904	2.94096
LOC_Os02g34710	expressed protein	0.75	17.93	5.68	0.653333	1.91667	3	3.15669	0.638889	0.707605	1.51708	1.79755	1.83649	20.1733	23.2128	7.02061	2.99395	0.686103	0	1.13159
LOC_Os10g22520	cellulase, putative, expressed	46.76	26.82	10.7867	46.3667	36.2033	25.5867	2.4864	1.41493	3.66766	113.575	9.13778	11.9271	5.49223	23.433	30.7092	4.70075	0	0.487752	0
LOC_Os10g41400	peptide methionine sulfoxide reductase, putative, expressed	117.6	61.9033	29.4967	109.447	65.4567	47.4767	2.09866	1.37871	242.29	60.3802	109.578	16.2759	72.2527	25.0462	71.5573	65.1897	6.09815	26.0738	4.91389
LOC_Os12g06260	harpin-induced protein 1 domain containing protein, expressed	59.9133	37.6633	17.0233	68.2133	40.86	34.0733	2.21245	1.19918	18.3941	29.9653	52.3989	51.5961	131.171	26.655	79.217	38.7576	6.66393	11.9094	4.13183
LOC_Os02g19924	aminotransferase, classes I and II, domain containing protein, expressed	17.6267	21.57	10.0033	18.4867	23.75	24.28	2.15628	0.978171	12.8508	12.307	15.7283	5.25036	18.4588	27.0209	10.5391	8.17111	0.605275	4.05539	0
LOC_Os11g29500	expressed protein	74.3633	51.2333	23.1167	46.8867	50.3767	38.0667	2.21629	1.32338	51.7447	53.1449	64.8657	39.2493	34.8021	27.887	65.157	18.7626	1.42456	11.3377	1.97857
LOC_Os03g02960	nascent polypeptide-associated complex subunit alpha, putative, expressed	42.7233	48.8867	19.7267	48.8067	53.8267	53.6267	2.4782	1.00373	33.868	76.0865	67.6994	20.5615	44.3201	29.4938	29.1616	15.8648	1.37275	3.70708	2.29059
LOC_Os05g24650	DUF567 domain containing protein, putative, expressed	54.6067	71.55	24.85	59.8133	80.1767	57.01	2.87928	1.40636	183.995	36.3196	87.9802	2.61843	19.4105	29.5501	49.1609	14.2246	2.84673	0.615223	2.77528
LOC_Os06g01210	plastocyanin, chloroplast precursor, putative, expressed	278.433	231.863	49.1533	289.193	222.703	155.477	4.71714	1.43239	6848.97	813.046	3485.99	211.03	1921.58	30.9206	379.042	333.224	0	1.75219	0.606295
LOC_Os05g09580	expressed protein	365.763	213.84	89.4367	336.42	470.08	431.463	2.39097	1.0895	116.458	64.0309	34.9629	186.236	151.036	31.2168	414.265	93.8955	7.75569	28.9376	4.62751
LOC_Os06g38294	peptide transporter PTR2, putative, expressed	21.9367	18.0333	4.22667	17.86	21.1133	20.6967	4.26656	1.02013	13.007	4.40105	9.43759	2.40062	33.0357	32.0477	32.3258	38.9172	11.4636	13.2643	7.90273
LOC_Os01g04950	peptide transporter PTR2, putative, expressed	85.4133	106.07	48.6667	63.62	110.767	88.18	2.17952	1.25614	16.1886	59.2896	10.3003	28.9013	30.9533	33.8629	47.4395	18.3559	1.75237	16.9996	2.28226
LOC_Os01g64520	uricase, putative, expressed	72.3333	52.5167	21.9533	62.11	39.3633	40.0833	2.3922	0.982037	10.7029	37.4603	5.10085	21.3501	24.7487	34.4522	75.96	55.5992	49.8309	51.9502	30.5386
LOC_Os05g08554	expressed protein	69.8867	93.96	23.77	90.34	81.3667	78.7	3.95288	1.03388	78.2863	274.956	238.928	5.55566	334.943	35.3202	31.6204	14.3693	0	0	0
LOC_Os10g33250	WAX2, putative, expressed	224.207	210.223	48.5833	310.303	221.853	176.693	4.32707	1.25558	0	0	0.192803	119.405	209.7	36.6616	132.129	1.92578	0	0	0
LOC_Os04g23040	expressed protein	35.78	28.8367	12.6	33.35	39.0267	26.7633	2.28862	1.45821	54.4151	60.0639	52.2299	17.3655	19.6104	38.856	27.4439	10.7757	1.73715	20.8487	1.51867
LOC_Os06g50070	expressed protein	10.98	6.34333	1.31333	12.58	8.27	5.54	4.82995	1.49278	54.7209	16.9183	197.328	9.23022	9.73635	39.1647	4.23612	8.89019	0	1.28225	0
LOC_Os04g33110	expressed protein	180.403	231.693	89.7367	167.083	221.74	162.77	2.58192	1.36229	175.046	40.4665	61.7538	86.2452	181.115	39.9093	251.905	411.423	16.7704	11.4344	36.2595
LOC_Os01g45090	MYB family transcription factor, putative, expressed	302.983	14.3767	4.1	363.29	26.2	19.3467	3.5065	1.35424	0	0	4.03999	0	1.48064	40.9252	76.8544	0.945921	0	0	0
LOC_Os03g10620	hydrolase, alpha/beta fold family domain containing protein, expressed	91.5233	32.0233	10.6767	80.44	43.9767	35.2867	2.99938	1.24627	193.48	141.089	39.6111	22.9939	77.574	42.0163	168.385	67.9991	13.3372	3.76048	5.40895
LOC_Os02g44590	OsSub20 - Putative Subtilisin homologue, expressed	123.137	92.07	38.04	142.85	93.93	73.7367	2.42035	1.27386	0	0	0.137731	0.192143	4.13518	42.6038	53.4761	0	0	0	0
LOC_Os10g28200	NAD dependent epimerase/dehydratase family protein, putative, expressed	214.963	91.6967	39.84	231.46	154.49	110.377	2.30162	1.39966	49.13	326.184	32.7514	26.8547	30.3634	42.7904	134.383	27.2163	1.01467	18.4831	1.03738
LOC_Os02g09630	GA20292-PA, putative, expressed	35.4467	16.2433	6.21	38.7367	15.9933	14.7033	2.61567	1.08774	0.816302	5.00997	2.65239	10.8287	16.4959	46.0087	37.0662	8.16562	1.39914	0	8.71081
LOC_Os03g38540	folic acid binding protein, putative, expressed	260.7	36.3167	14.9	271.337	89.4233	63.4767	2.43736	1.40876	8.16836	31.997	7.99557	39.8246	75.4457	49.8315	106.177	34.1142	10.8448	5.89693	4.24043
LOC_Os07g09150	expressed protein	59.8733	46.61	20.4567	63.6233	71.81	52.8867	2.27847	1.35781	68.3506	35.4977	33.8073	14.9693	27.935	50.5852	56.9604	30.3838	6.22561	21.3741	2.9847
LOC_Os08g31090	expressed protein	20.7833	41.29	17.9733	14.06	37.8133	34.19	2.29729	1.10598	3.14925	2.64366	0.781301	1.62364	0.760865	52.1379	6.27166	8.39424	1.04926	2.37355	4.01638
LOC_Os03g18600	cyclase/dehydrase family protein, putative, expressed	9.76333	20.72	8.96667	7.95667	21.3167	14.97	2.31078	1.42396	12.5981	9.81043	24.9376	11.807	40.7356	56.0134	51.0166	19.255	4.36191	0	2.21708
LOC_Os01g58620	expressed protein	98.51	64.6967	31.2733	110.593	70.6033	62.7533	2.06875	1.12509	10.9736	20.2008	11.1588	24.6639	26.0206	64.5326	129.222	57.0918	20.949	70.2118	28.7068
LOC_Os07g46670	early response to dehydration 15, putative, expressed	433.823	157.033	70.68	437.387	213.047	145.7	2.22175	1.46223	39.7095	253.668	24.5894	36.685	67.7472	73.7741	150.695	77.1497	10.7664	9.3819	6.05169
LOC_Os08g04180	tryptophan synthase beta chain 1, putative, expressed	217.783	142.383	63.9833	227.057	163.813	153.96	2.22532	1.064	105.637	85.0189	104.606	25.4644	71.9485	74.9601	101.739	87.202	62.4081	34.4748	73.278
LOC_Os12g08090	amino acid transporter, putative, expressed	110.78	25.13	8.72667	93.7333	31.9067	27.7167	2.87968	1.15117	29.7881	22.0922	15.8885	7.45638	18.9141	75.5658	39.8523	8.61859	0.668781	0.534229	0.466709
LOC_Os05g39990	expansin precursor, putative, expressed	230.28	256.713	104.91	244.847	180.93	141.91	2.44699	1.27496	11.9691	31.3006	28.559	76.5866	53.0534	82.3723	425.341	96.2501	19.7943	20.3294	12.26
LOC_Os07g46990	copper/zinc superoxide dismutase, putative, expressed	339.407	313.217	146.927	313.337	314.57	252.053	2.13179	1.24803	97.9351	71.9964	107.575	103.948	240.76	85.4601	208.129	173.784	54.6869	176.455	38.3042
LOC_Os03g08470	AP2 domain containing protein, expressed	179.883	440.893	158.04	187.427	395.603	348.457	2.78976	1.1353	2.06193	66.7054	5.38036	7.85479	35.3966	96.2189	90.8277	220.076	19.5988	5.31728	10.1282
LOC_Os03g03034	flavonol synthase/flavanone 3-hydroxylase, putative, expressed	50.0433	104.31	33.2033	36.52	101.743	87.06	3.14155	1.16866	8.33741	686.691	2.65477	2.071	41.9484	103.635	28.1448	3.37404	0.48384	2.11047	1.0575
LOC_Os01g72100	OsCML10 - Calmodulin-related calcium sensor protein, expressed	121.253	203.55	98.9767	99.2667	106.817	86.1767	2.05655	1.23951	34.9015	28.6675	52.1863	70.0933	47.0105	121.476	115.602	72.4003	11.0541	5.22589	52.3609
LOC_Os03g22270	auxin-repressed protein, putative, expressed	548.243	167.117	70.2433	500.96	347.763	278.113	2.37911	1.25044	204.825	168.104	80.8463	110.031	225.07	156.004	828.52	91.7856	4.11775	103.489	14.7593
LOC_Os11g02389	protease inhibitor/seed storage/LTP family, putative, expressed	140.133	174.61	67.9667	83.3033	132.267	118.147	2.56905	1.11951	547.946	263.863	490.249	2.3523	186.735	225.171	501.691	219.649	165.678	916.683	354.512
LOC_Os11g08760	pectinesterase family protein, expressed	80.16	32.3667	8.43	67.63	24.16	25.8933	3.83946	0.933059	0	0	0	0	18.294	226.574	4.56637	0	0	0	0
LOC_Os03g17790	OsRCI2-5 - Putative low temperature and salt responsive protein, expressed	61.14	25.95	6.57333	43.39	18.89	16.1333	3.94777	1.17087	18.1674	26.8503	6.52175	1.37412	21.7698	252.926	28.9288	129.78	77.9904	107.236	119.177
LOC_Os01g66030	OsMADS2 - MADS-box family gene with MIKCc type-box, expressed	66.4367	49.7267	20.0833	79.8467	69.86	57.84	2.47602	1.20781	1.08919	0	0.753366	45.0902	151.221	274.877	129.899	17.3629	1.7808	0.506656	1.64576
LOC_Os06g22960	aquaporin protein, putative, expressed	256.83	231.81	87.6467	215.88	309.18	247.387	2.64482	1.24978	235.791	266.53	780.21	579.644	157.227	351.687	454.918	351.634	9.30443	265.298	6.65903
LOC_Os11g44810	auxin-repressed protein, putative, expressed	1040.32	705.76	302.183	972.6	2077.09	1916.95	2.33554	1.08354	427.895	633.086	80.1574	79.6246	1502.34	359.174	3027.73	239.883	25.451	563.062	39.3623
LOC_Os11g02400	LTPL8 - Protease inhibitor/seed storage/LTP family protein precursor, expressed	510.21	636.573	274.14	583.997	727.277	627.52	2.32207	1.15897	297.359	113.738	1057.96	23.3714	486.633	397.837	170.701	81.5325	2.04621	42.5027	1.47846
LOC_Os12g43600	RNA recognition motif containing protein, expressed	2398.21	6016.95	2475.63	1967.88	6315.01	5067.66	2.43047	1.24614	955.104	1693.67	1431.49	853.292	2582.47	691.982	1770.86	3166.83	416.422	254.73	395.141
LOC_Os02g01310	invertase/pectin methylesterase inhibitor family protein, putative, expressed	22.0133	11.5233	3.96	30.05	13.88	12.12	2.90993	1.14521	0	0	0.238346	0	144.101	885.029	2.28971	0	0	0	0
LOC_Os10g36170	LTPL160 - Protease inhibitor/seed storage/LTP family protein precursor, expressed	60.91	82.4167	37.9633	51.4367	88.0933	59.1867	2.17095	1.4884	12.241	121.64	222.408	47.2352	457.322	1149.19	377.575	51.2805	0	0	0
