# Supplementary material for: Identification and Analysis of Genes Involved in Double Fertilization in Rice
Source: Int J Mol Sci. 2021 Nov 27;22(23):12850. doi: 10.3390/ijms222312850 (PMC8657449; doi:10.3390/ijms222312850)
Supplement: Supplementary file 1 [file ijms-22-12850-s001.zip › Table S20. GO enrichment analysis of the 332 genes involved in the recognition and fusion of the male-female gametes..xls]

## Sheet: GO富集分析统计表
Table S20. GO enrichment analysis of the 332 genes involved in the recognition and fusion of the male-female gametes.
GO ID	Term Type	Description	p-adjust	Gene Number	Type
GO:0055114	BP	oxidation-reduction process	0.00256888	39	Oxidation-reduction
GO:0009535	CC	chloroplast thylakoid membrane	0.000421238	18	Membrane
GO:0055035	CC	plastid thylakoid membrane	0.000421238	18
GO:0042651	CC	thylakoid membrane	0.000421238	19
GO:0034357	CC	photosynthetic membrane	0.000421238	19
GO:0009526	CC	plastid envelope	0.000644605	11
GO:0031975	CC	envelope	0.00181165	11
GO:0031967	CC	organelle envelope	0.00181165	11
GO:0044434	CC	chloroplast part	0.000421238	44	Chloroplast
GO:0009570	CC	chloroplast stroma	0.000421238	14
GO:0009507	CC	chloroplast	0.000468625	29
GO:0009941	CC	chloroplast envelope	0.000548019	11
GO:0009534	CC	chloroplast thylakoid	0.00121571	6
GO:0044444	CC	cytoplasmic part	0.00138789	117
GO:0009543	CC	chloroplast thylakoid lumen	0.0172578	3
GO:0031977	CC	thylakoid lumen	0.000421238	6
GO:0009579	CC	thylakoid	0.000421238	9
GO:0044436	CC	thylakoid part	0.000421238	23
GO:0031976	CC	plastid thylakoid	0.00121571	6
GO:0031978	CC	plastid thylakoid lumen	0.0172578	3
GO:0009532	CC	plastid stroma	0.000421238	14
GO:0044435	CC	plastid part	0.000421238	44
GO:0009536	CC	plastid	0.00106247	79
GO:0044446	CC	intracellular organelle part	0.0485493	53
GO:0044422	CC	organelle part	0.0485493	53
