# Supplementary material for: Identification and Analysis of Genes Involved in Double Fertilization in Rice
Source: Int J Mol Sci. 2021 Nov 27;22(23):12850. doi: 10.3390/ijms222312850 (PMC8657449; doi:10.3390/ijms222312850)
Supplement: Supplementary file 1 [file ijms-22-12850-s001.zip › Table S21. KEGG enrichment analysis of the 332 genes involved in the recognition and fusion of the male-female gametes..xls]

## Sheet: Sheet1
Table S21. KEGG enrichment analysis of the 332 genes involved in the recognition and fusion of the male-female gametes.
Pathway ID	Description	First Category	Second Category	p-adjust	Gene number
map00195	Photosynthesis	Metabolism	Energy metabolism	0.00143973	8
map00061	Fatty acid biosynthesis	Metabolism	Lipid metabolism	0.0239253	4
