# Supplementary material for: Identification and Analysis of Genes Involved in Double Fertilization in Rice
Source: Int J Mol Sci. 2021 Nov 27;22(23):12850. doi: 10.3390/ijms222312850 (PMC8657449; doi:10.3390/ijms222312850)
Supplement: Supplementary file 1 [file ijms-22-12850-s001.zip › Table S22. The 430 genes related to the zygote formation and endosperm nuclear division..xlsx]

## Sheet: Sheet1
Table S22. The 430 genes related to the zygote formation and endosperm nuclear division.
Gene ID	Gene product	The average FPKM values of genes in each sample						FC(N2/N3)	FC(N3/M3)
		N1	N2	N3	M1	M2	M3
LOC_Os09g25620	CPuORF8 - conserved peptide uORF-containing transcript, expressed	8.46333	59.5633	179.573	11.5533	22.68	36.77	0.331694	4.88369
LOC_Os02g57250	OsIAA10 - Auxin-responsive Aux/IAA gene family member, expressed	5.34	142.613	188.443	4.85	14.08	57.2533	0.756797	3.29139
LOC_Os06g08080	inorganic H+ pyrophosphatase, putative, expressed	13.0833	148.977	219.627	15.5233	95.1067	109.957	0.678318	1.99739
LOC_Os03g02874	retrotransposon protein, putative, Ty3-gypsy subclass, expressed	0.16	14.1567	79.1467	0.0866667	3.93	30.6867	0.178866	2.57919
LOC_Os04g32540	OsSCP24 - Putative Serine Carboxypeptidase homologue, expressed	6.56	32.2533	89.7233	6.14	14.3933	36.8667	0.359475	2.43373
LOC_Os01g10850	peroxidase precursor, putative, expressed	6.88667	71.25	165.36	4.47	12.46	37.05	0.430878	4.46316
LOC_Os07g39020	OsSub53 - Putative Subtilisin homologue, expressed	48.48	66.46	446.91	28.33	55.3967	109.303	0.14871	4.08871
LOC_Os08g38700	C3-BTB2 - Bric-a-Brac, Tramtrack, Broad Complex BTB domain with C3 subfamily conserved sequence, expressed	3.65	29.99	69.3567	3.32667	15.89	30.0533	0.432403	2.30779
LOC_Os09g35800	UDP-glucose 4-epimerase, putative, expressed	2.96	7.47	73.1167	1.92	3.76667	26.1433	0.102165	2.79676
LOC_Os04g40510	glycosyl hydrolase family 5 protein, putative, expressed	2.62667	28.05	53.7133	1.87333	7.49333	17.4833	0.522217	3.07226
LOC_Os09g32988	POEI18 - Pollen Ole e I allergen and extensin family protein precursor, expressed	2.21333	31.0267	43.9767	1.41333	7.41	16.8867	0.705526	2.60422
LOC_Os04g55710	transposon protein, putative, unclassified, expressed	32.34	86.08	399.097	23.2767	12.7633	69.85	0.215687	5.71362
LOC_Os02g50860	ras-related protein, putative, expressed	15.49	100.153	130.9	14.1133	35.8767	54.7833	0.765113	2.38941
LOC_Os04g39980	gibberellin 20 oxidase 2, putative, expressed	1.59667	57.12	59.2367	2.02	4.6	10.5967	0.964268	5.59012
LOC_Os08g43730	DUF630/DUF632 domains containing protein, putative, expressed	2.47	17.6567	26.1567	1.64	6.22333	13.62	0.675035	1.92046
LOC_Os03g58600	PAZ domain containing protein, putative, expressed	0.586667	11.25	13.3333	0.483333	2.62333	2.67	0.84375	4.99376
LOC_Os04g38570	multidrug resistance protein, putative, expressed	19.31	82.6833	105.36	15.9967	37.8067	53.99	0.78477	1.95147
LOC_Os04g44230	cytokinin dehydrogenase precursor, putative, expressed	0.33	5.26	33.0867	0.19	1.71333	5.11	0.158976	6.47489
LOC_Os01g07500	alliin lyase precursor, putative, expressed	0.35	7.65333	22.2467	0.376667	0.376667	2.49	0.344022	8.9344
LOC_Os05g04530	IF, putative, expressed	3.48667	4.79333	44.4367	2.02	3.7	20.78	0.107869	2.13843
LOC_Os02g42310	OsSCP8 - Putative Serine Carboxypeptidase homologue, expressed	2.53333	10.3567	33.6	1.70667	9.75667	16.2367	0.308234	2.06939
LOC_Os03g58350	OsIAA14 - Auxin-responsive Aux/IAA gene family member, expressed	6.98667	29.8733	89.7667	3.59667	10.5333	22.8767	0.332789	3.92394
LOC_Os11g23080	retrotransposon protein, putative, unclassified, expressed	0.41	21.67	42.8333	0.23	3.95667	21.59	0.505914	1.98394
LOC_Os01g60770	expansin precursor, putative, expressed	5.95	74.3067	81.5433	7.90667	14.9233	23.05	0.911254	3.53767
LOC_Os10g07290	glycosyl hydrolases family 17, putative, expressed	9.57	52.6767	71.3767	7.5	21.76	33.7067	0.73801	2.11758
LOC_Os02g45310	dehydration response related protein, putative, expressed	1.71333	25.1667	24.5833	1.7	3.8	9.65	1.02373	2.5475
LOC_Os01g24030	AMP-binding enzyme, putative, expressed	0.286667	6.95667	17.4667	0.0766667	0.53	1.59333	0.398282	10.9623
LOC_Os03g29190	PDI, putative, expressed	3.47	16.7133	32.33	2.64333	12.3567	9.30667	0.516961	3.47385
LOC_Os02g49420	fasciclin-like arabinogalactan precursor protein, putative, expressed	20.3567	237.03	500.28	9.15333	50.6733	159.167	0.473795	3.14312
LOC_Os03g01590	PAIR1, putative, expressed	0.63	0.98	15.2367	0.64	1.18	6.88	0.0643185	2.21463
LOC_Os10g01570	C-5 cytosine-specific DNA methylase, putative, expressed	8.05667	29.3867	172.367	5.43333	8.46333	89.9133	0.170489	1.91703
LOC_Os02g54520	MYB family transcription factor, putative, expressed	0.516667	9.34667	15.5967	0.546667	3.55667	4.78667	0.599273	3.25836
LOC_Os03g45760	expressed protein	6.46667	9.47	77.3967	3.82667	4.90333	38.7233	0.122357	1.99871
LOC_Os11g05290	stress responsive A/B Barrel domain containing protein, expressed	4.05667	11.24	75.3567	3.41333	7.47	24.3667	0.149157	3.09261
LOC_Os03g17760	RNA recognition motif containing protein, putative, expressed	11.2467	31.46	69.7067	9.3	9.68	27.62	0.45132	2.52378
LOC_Os01g63190	laccase precursor protein, putative, expressed	0.213333	9.69333	18.7267	0.266667	4.52	8.44667	0.517622	2.21705
LOC_Os06g44310	tetraspanin family protein, putative, expressed	9.13667	11.9	69.74	8.16333	11.2867	29.2	0.170634	2.38836
LOC_Os02g40784	WAX2, putative, expressed	2.51	10.31	22.16	2.39667	5.23667	7.21	0.465253	3.07351
LOC_Os10g35950	transferase family protein, putative, expressed	0.163333	33	21.7667	0.413333	7.52	5.36333	1.51608	4.05842
LOC_Os01g07200	staphylococcal nuclease homologue, putative, expressed	4.74667	9.72667	32.2	4.53	8.34333	14.8867	0.30207	2.16301
LOC_Os12g41890	amino acid permease family protein, putative, expressed	0.773333	0.893333	19.78	0.563333	0.473333	2.04	0.0451635	9.69608
LOC_Os02g36500	expressed protein	7.34333	6.19	51.3467	6.07667	4.65	23.8533	0.120553	2.1526
LOC_Os04g15920	dehydrogenase, putative, expressed	2.22667	25.5767	27.0133	0.853333	7.18333	6.76	0.946816	3.99606
LOC_Os08g03560	chloroplast unusual positioning protein, putative, expressed	1.34333	1.67	20.36	0.806667	1.03667	10.1267	0.0820236	2.01053
LOC_Os05g42240	expressed protein	0.74	21.3433	30.53	0.656667	6.17	8.66	0.699094	3.5254
LOC_Os03g12890	aminotransferase domain containing protein, putative, expressed	0.29	0.69	13.7367	0.343333	0.833333	3.84667	0.0502305	3.57106
LOC_Os07g48310	inactive receptor kinase At2g26730 precursor, putative, expressed	8.48667	21.3067	39.36	7.83667	12.6333	19.5867	0.541328	2.00953
LOC_Os05g44070	ras-related protein, putative, expressed	21.3167	43.9767	98.2133	19.6333	18.07	40.8667	0.447767	2.40326
LOC_Os12g13570	MYB family transcription factor, putative, expressed	1.47333	2.31	18.53	0.883333	1.11667	8.36	0.124663	2.21651
LOC_Os02g28850	Kinesin motor domain domain containing protein, expressed	1.82333	1.82	20.2733	1.21333	1.00333	7.33	0.0897731	2.7658
LOC_Os08g44420	kinesin-related protein, putative, expressed	9.09667	14.0367	116.377	5.70667	6.79	60.68	0.120614	1.91788
LOC_Os03g53970	expressed protein	2.22333	2.33333	28.1767	1.45667	2.14333	13.6133	0.0828108	2.06978
LOC_Os11g01200	senescence-induced receptor-like serine/threonine-protein kinase precursor, putative, expressed	10.4333	42.3567	47.6867	10.9333	14.3567	24.0833	0.888229	1.98007
LOC_Os07g07410	oxidoreductase, 2OG-Fe oxygenase family protein, putative, expressed	24.0067	41.5	102.287	16.5567	27.1033	41.7433	0.405722	2.45037
LOC_Os08g10510	aminotransferase, putative, expressed	46.8667	85.4667	196.587	41.75	53.38	84.09	0.434753	2.33781
LOC_Os12g02710	expressed protein	2.19	2.57333	25.27	1.28	1.87	11.9267	0.101834	2.11878
LOC_Os01g59150	tubulin/FtsZ domain containing protein, putative, expressed	55.23	75.2433	227.747	51.68	60.6733	105.33	0.330382	2.16222
LOC_Os04g52320	QRT3, putative, expressed	4.33667	11.81	30.1033	4.07667	7.59	10.1733	0.392315	2.95904
LOC_Os03g20450	expressed protein	5.55667	14.0767	26.33	5.14667	6.29667	10.4067	0.534625	2.53011
LOC_Os03g12140	glucan endo-1,3-beta-glucosidase precursor, putative, expressed	16.8667	45.93	133.88	12.7567	32.6067	53.35	0.343068	2.50947
LOC_Os09g34250	UDP-glucoronosyl and UDP-glucosyl transferase domain containing protein, expressed	7.00667	11.4433	92.2733	4.21	14.5867	18.61	0.124016	4.95827
LOC_Os03g18640	laccase precursor protein, putative, expressed	0.48	0.456667	10.41	0.296667	0.223333	2.86333	0.0438681	3.63562
LOC_Os03g53920	kinesin motor domain containing protein, putative, expressed	5.26	8.87333	63.6367	3.32667	4.63667	31.86	0.139437	1.99738
LOC_Os04g53760	kinesin motor domain containing protein, putative, expressed	3.81333	4.34667	51.9667	2.69333	3.06333	21.8533	0.0836434	2.37797
LOC_Os01g09580	CAMK_CAMK_like_Aur_like.1 - CAMK includes calcium/calmodulin depedent protein kinases, expressed	9.40333	8.94667	75.62	6.37	5.28333	25.7133	0.118311	2.94089
LOC_Os02g50910	expressed protein	10.4633	11.7733	92.3433	8.30667	9.37	44.16	0.127495	2.09111
LOC_Os06g36450	ferroportin1 domain containing protein, expressed	10.3133	25.2133	41.8233	6.91	17.54	19.2033	0.602853	2.17792
LOC_Os05g34854	gibberellin 20 oxidase 2, putative, expressed	0.21	11.37	13.72	0.32	6.31333	5.60333	0.828717	2.44854
LOC_Os03g18980	kinesin motor domain containing protein, expressed	1.55667	2.93333	11.6433	1.37	1.82333	4.65333	0.251932	2.50215
LOC_Os01g62190	ZOS1-15 - C2H2 zinc finger protein, expressed	0.296667	7.26	37.3233	0.106667	2.74667	14.5567	0.194516	2.564
LOC_Os04g39280	ATPOT1, putative, expressed	8.22	9.49	29.1267	7.42667	12.2467	17.4633	0.325818	1.66788
LOC_Os02g03710	UP-9A, putative, expressed	1.70333	24.1233	44.04	3.31	11.16	16.7567	0.54776	2.62821
LOC_Os01g18050	tubulin/FtsZ domain containing protein, putative, expressed	73.79	137.683	443.967	62.2767	50.3533	206.14	0.310121	2.15371
LOC_Os10g35580	ATEB1A-like microtubule associated protein, putative, expressed	14.2233	17.6367	175.53	8.63333	10.3533	60.9533	0.100477	2.87974
LOC_Os06g10750	integral membrane protein DUF6 containing protein, expressed	0.316667	1.59333	9.99667	0.313333	0.66	1.98	0.159386	5.04882
LOC_Os10g17790	remorin C-terminal domain containing protein, putative, expressed	1.86	5.09333	29.5533	1.23	2.59667	14.85	0.172344	1.99012
LOC_Os01g49200	microtubule associated protein, putative, expressed	9.32	10.1167	138.913	6.52667	4.91333	53.1467	0.0728272	2.61377
LOC_Os08g10300	SHR5-receptor-like kinase, putative, expressed	0.32	1.59	4.91333	0.403333	1.37333	2.05	0.323609	2.39675
LOC_Os11g32110	auxin response factor, putative, expressed	42.8967	132.67	221.903	45.69	58.9333	110.56	0.597873	2.00709
LOC_Os03g17960	expressed protein	5.55333	4.56667	49.9333	3.90333	4.01333	23.08	0.0914553	2.16349
LOC_Os05g33080	serine/threonine-protein kinase, putative, expressed	2.88667	11.07	16.2767	2.41333	3.54333	7.55333	0.680115	2.1549
LOC_Os06g38960	expressed protein	8.78667	12.1833	85.5867	6.66667	5.46	37.6233	0.142351	2.27483
LOC_Os06g04870	homeobox associated leucine zipper, putative, expressed	10.3233	57.4933	58.5233	11.1467	8.8	16.99	0.9824	3.44458
LOC_Os07g40480	zinc finger family protein, putative, expressed	5.39	8.41333	26.22	6.12667	10.9267	13.0033	0.320875	2.01641
LOC_Os12g34840	rhoGAP domain containing protein, expressed	2.90667	3.55667	25.1133	2.18	2.1	12.6367	0.141625	1.98734
LOC_Os05g34170	tubulin/FtsZ domain containing protein, putative, expressed	32.54	50.39	183.253	26.8067	31.6567	92.72	0.274975	1.97642
LOC_Os01g13260	cyclin-A1, putative, expressed	5.14	7.85333	59.29	3.67667	5.81	24.2567	0.132456	2.44428
LOC_Os05g23350	glycosyl hydrolase family 10 protein, putative, expressed	2.73667	154.087	299.057	2.30667	62.8	152.57	0.515242	1.96013
LOC_Os07g44400	POK1, putative, expressed	4.84	3.14667	43.4733	2.99333	3.91333	20.84	0.0723815	2.08605
LOC_Os10g19919	retrotransposon protein, putative, Ty3-gypsy subclass, expressed	0.0266667	25.6067	95.24	0.0733333	9.11333	46.72	0.268865	2.03853
LOC_Os08g01400	expressed protein	0.11	18.4033	29.11	0.06	0.916667	3.37333	0.6322	8.62945
LOC_Os04g53950	glycosyl hydrolases family 16 protein, protein, expressed	60.2067	162.34	355.873	38.98	32.28	172.267	0.456174	2.06583
LOC_Os03g39020	Kinesin motor domain domain containing protein, expressed	8.64333	9.03667	96.6633	5.56667	5.00333	31.38	0.093486	3.08041
LOC_Os01g54420	dynamin family protein, putative, expressed	2.54	2.75667	22.0367	1.82333	2.73333	11	0.125095	2.00333
LOC_Os05g49770	CTP synthase, putative, expressed	5.39667	16.3667	33.9333	6.76333	14.6167	15.72	0.482318	2.15861
LOC_Os11g37100	expressed protein	4.87333	11.4033	56.4033	3.44	4.95333	28.91	0.202175	1.951
LOC_Os03g09940	sulfate transporter, putative, expressed	0.793333	9.02667	15.2767	0.436667	3.44333	6.5	0.590879	2.35026
LOC_Os09g38710	HEAT repeat family protein, putative, expressed	3.91333	3.20667	47.7433	2.50667	3.93333	21.7967	0.0671647	2.1904
LOC_Os11g31980	OsSCP63 - Putative Serine Carboxypeptidase homologue, expressed	1.68	3.56667	17.1967	1.52667	5.79333	8.96333	0.207405	1.91856
LOC_Os04g28260	Kinesin motor domain domain containing protein, expressed	4.07	4.83667	35.1933	3.36333	3.95667	17.67	0.137431	1.9917
LOC_Os03g10800	BTBN4 - Bric-a-Brac, Tramtrack, Broad Complex BTB domain with non-phototropic hypocotyl 3 NPH3 domain, expressed	3.93333	12.4933	26.28	3.51	3.48667	6.64667	0.475393	3.95386
LOC_Os03g53580	expressed protein	1.73333	2.06333	19.9367	1.06667	1.57	7.25667	0.103494	2.74736
LOC_Os01g52880	leucine-rich repeat family protein, putative, expressed	2.22	24.3267	27.0767	1.70333	1.92667	7.73333	0.898437	3.50129
LOC_Os08g32600	STE_MEKK_ste11_MAP3K.21 - STE kinases include homologs to sterile 7, sterile 11 and sterile 20 from yeast, expressed	4.67333	4.47	42.19	2.83333	3.69667	17.7133	0.105949	2.38182
LOC_Os05g38480	kinesin motor domain containing protein, putative, expressed	5.56333	6.81333	60.8333	4.18667	4.27333	23.1567	0.112	2.62703
LOC_Os02g19990	reticulon domain containing protein, putative, expressed	11.1533	14.0733	59.1367	9.23	14.0233	24.1667	0.23798	2.44703
LOC_Os09g21510	STE_MEKK_ste11_MAP3K.2 - STE kinases include homologs to sterile 7, sterile 11 and sterile 20 from yeast, expressed	6.10333	6.30667	42.73	4.04333	5.00667	17.63	0.147593	2.42371
LOC_Os04g30720	kinesin motor domain containing protein, putative, expressed	3.11667	3.80667	34.21	2.29667	2.07333	13.1433	0.111274	2.60284
LOC_Os03g21510	inactive receptor kinase At2g26730 precursor, putative, expressed	9.25333	18.49	33.4067	10.23	9.02333	16.9833	0.553482	1.96703
LOC_Os01g67160	cyclin-dependent kinase B1-1, putative, expressed	22.5067	30.14	111.807	18.84	18.0067	54.3833	0.269572	2.0559
LOC_Os01g13229	cyclin-A1, putative, expressed	3.36667	2.73333	24.4867	1.8	2.5	10.11	0.111625	2.42202
LOC_Os04g36740	potassium channel SKOR, putative, expressed	2.28333	4.59333	10.8733	2.66	2.96333	7.30667	0.42244	1.48814
LOC_Os03g21730	receptor-like protein kinase precursor, putative, expressed	13.3733	23.0233	58.26	12.5867	16.14	28.7967	0.395183	2.02315
LOC_Os05g33030	kinesin motor domain containing protein, putative, expressed	6.89333	6.26667	68.9	4.04333	3.91	25.47	0.0909531	2.70514
LOC_Os01g64860	OsSub11 - Putative Subtilisin homologue, expressed	0.25	2.24667	8.43333	0.0866667	0.976667	2.41333	0.266403	3.49448
LOC_Os02g35140	auxin response factor 7, putative, expressed	12.23	32.2367	52.5467	12.2033	13.7967	25.87	0.613486	2.03118
LOC_Os03g43990	BTBN8 - Bric-a-Brac, Tramtrack, Broad Complex BTB domain with non-phototropic hypocotyl 3 NPH3 and coiled-coil domains, expressed	2.97667	6.37	15.96	2.49667	5.02	7.65667	0.399123	2.08446
LOC_Os03g02290	kinesin motor domain containing protein, putative, expressed	9.00333	7.88333	69.69	5.91667	5.67333	30.85	0.11312	2.259
LOC_Os01g12860	MYB family transcription factor, putative, expressed	4.28333	3.87	26.6767	3.13	2.94333	10.2133	0.145071	2.61195
LOC_Os02g10020	Mad3/BUB1 homology region 1 domain containing protein, expressed	3.96333	4.99333	40.61	2.60333	3.20333	14.32	0.122958	2.83589
LOC_Os01g47300	retrotransposon protein, putative, unclassified, expressed	0.0933333	9.92	21.1933	0.19	3.28667	10.4	0.468072	2.03782
LOC_Os02g15560	transposon protein, putative, Mutator sub-class, expressed	0.216667	1.4	4.29667	0.08	0.426667	1.02333	0.325834	4.1987
LOC_Os04g44640	ulp1 protease family, C-terminal catalytic domain containing protein, expressed	0.9	0.883333	8.38333	0.406667	0.52	3.02	0.105368	2.77594
LOC_Os08g41400	expressed protein	4.10667	21.2733	43.1567	4.79667	9.85	19.6167	0.492933	2.2
LOC_Os07g32480	mitotic checkpoint serine/threonine-protein kinase BUB1, putative, expressed	6.72667	8.02667	45.32	5.48333	8.96	23.0833	0.177111	1.96332
LOC_Os07g47090	KIP1, putative, expressed	4.08	4.61	42.3567	2.79	3.67	15.2033	0.108838	2.78601
LOC_Os12g36890	CSLD4 - cellulose synthase-like family D, expressed	6.23	5.98333	68.0133	3.59667	3.54	20.61	0.0879729	3.30002
LOC_Os09g31230	expressed protein	1.51667	3.47	9.42667	1.66	3.50333	4.37667	0.368105	2.15385
LOC_Os11g04190	auxin efflux carrier component, putative, expressed	0.246667	2.57333	5.75667	0.306667	1.28667	2.66667	0.447018	2.15875
LOC_Os11g08200	eukaryotic aspartyl protease domain containing protein, expressed	69.3567	81.3833	278.08	50.38	72.58	114.487	0.292662	2.42893
LOC_Os04g37960	synaptonemal complex protein 2, putative, expressed	0.553333	1.42667	5.35333	0.33	1.32667	2.6	0.266501	2.05897
LOC_Os04g56995	expressed protein	0.356667	11.07	25.35	0.53	6.10333	6.40667	0.436686	3.95682
LOC_Os03g56260	kinesin motor domain containing protein, putative, expressed	3.20333	7.27	21.6667	2.98667	3.76	7.39333	0.335538	2.93057
LOC_Os02g07730	haloacid dehalogenase-like hydrolase domain-containing protein 3, putative, expressed	0.776667	8.94667	23.3	0.61	5.09	11.8367	0.383977	1.96846
LOC_Os12g43940	ankyrin repeat domain-containing protein, putative, expressed	5.82333	9.36	35.9833	4.31	6.39	17.7733	0.26012	2.02457
LOC_Os10g05690	transmembrane amino acid transporter protein, putative, expressed	0.4	1.76667	6.41	0.363333	0.96	2.43333	0.275611	2.63425
LOC_Os02g06340	EH domain-containing protein 1, putative, expressed	11.8333	9.91	83.2833	9.27667	7.49	40.67	0.118991	2.04778
LOC_Os03g10478	glycosyl hydrolase family 10 protein, putative, expressed	0.763333	2.35667	11.21	0.51	1.4	4.23333	0.210229	2.64803
LOC_Os10g25220	SAP domain containing protein, expressed	2.23667	2.12667	15.1067	1.53	1.77	6.21333	0.140777	2.43133
LOC_Os12g17530	expressed protein	3.72667	3.10333	31.8067	2.39	2.42	11.49	0.0975686	2.7682
LOC_Os11g02740	expressed protein	2.78667	2.94333	27.2067	1.71333	1.67333	11.61	0.108184	2.34338
LOC_Os02g52370	armadillo/beta-catenin repeat family protein, putative, expressed	9.02667	19.3567	36.0167	9.24333	15.2867	18.38	0.537436	1.95956
LOC_Os03g08790	aspartic proteinase nepenthesin precursor, putative, expressed	9.76667	16.3733	89.3633	6.20667	6.26667	45.2967	0.183222	1.97285
LOC_Os02g43300	expressed protein	4.98667	15.5767	32.42	3.15333	9.31667	17.1567	0.480465	1.88964
LOC_Os07g08460	OsIAA24 - Auxin-responsive Aux/IAA gene family member, expressed	15.51	39.9867	62.7733	16.5833	11.3033	20.3467	0.637001	3.08519
LOC_Os09g31130	citrate transporter, putative, expressed	8.69667	8.95333	40.6233	6.27333	8.28667	18.2867	0.220399	2.22147
LOC_Os03g24100	expressed protein	1.90333	6.73333	26.2367	2.11667	5.05	13.4967	0.256638	1.94394
LOC_Os01g39136	retrotransposon protein, putative, unclassified, expressed	0.0533333	4.17	7.83	0.0666667	1.43333	2.93333	0.532567	2.66932
LOC_Os09g20240	DUF581 domain containing protein, expressed	2.54667	11.3167	16.8333	2.25	3.80667	5.48333	0.672277	3.06991
LOC_Os05g13970	phosphorylase domain containing protein, putative, expressed	0.103333	0.523333	9.24667	0.186667	1.31	3.72333	0.056597	2.48344
LOC_Os08g16830	retrotransposon protein, putative, SINE subclass, expressed	5.95333	23.5933	45.8933	4.69667	9.81	23.24	0.514091	1.97476
LOC_Os03g54130	cysteine protease 1 precursor, putative, expressed	0.32	5.02333	10.11	0.16	2.75	4.56333	0.496868	2.21549
LOC_Os12g42160	kinesin motor domain containing protein, putative, expressed	3.50333	4.32667	33.81	2.36333	2.71667	11.93	0.12797	2.83403
LOC_Os12g39980	kinesin motor domain containing protein, putative, expressed	3.53333	3.28	28.9133	2.32667	2.11667	10.7067	0.113442	2.7005
LOC_Os02g42560	expressed protein	4.38333	4.01667	31.9633	2.86667	2.82	12.9167	0.125665	2.47458
LOC_Os04g35100	phospholipase C, putative, expressed	1.61333	5.19667	15.9167	2.03333	4.35333	5.85	0.326492	2.7208
LOC_Os11g30360	expressed protein	37.9233	51.1667	156.477	31.6933	47.7267	61.0533	0.326992	2.56295
LOC_Os02g43130	kinesin motor domain containing protein, expressed	15.18	25.4967	87.9067	12.9367	17.2967	39.1767	0.290042	2.24385
LOC_Os04g39110	GASR4 - Gibberellin-regulated GASA/GAST/Snakin family protein precursor, expressed	29.12	56.18	148.273	19.7233	23.63	69.8533	0.378895	2.12264
LOC_Os01g01660	isoflavone reductase, putative, expressed	6.10667	18.17	36.9767	4.46333	4.20667	8.88	0.491391	4.16404
LOC_Os10g20450	MATE efflux family protein, putative, expressed	1.76	8.95	12.0267	0.86	3.06667	4.12667	0.74418	2.91438
LOC_Os01g42030	mitochondrial chaperone BCS1, putative, expressed	0.586667	11.28	6.66	0.38	3.26333	3.39667	1.69369	1.96075
LOC_Os07g29190	expressed protein	4.07	5.13667	31.92	2.14333	2.49667	10.6933	0.160923	2.98504
LOC_Os01g51230	IQ calmodulin-binding motif domain containing protein, expressed	1.82667	1.52	15.98	1.26	1.51667	7.09667	0.0951189	2.25176
LOC_Os07g45060	uncharacterized GPI-anchored protein At5g19240 precursor, putative, expressed	28.2933	35.5467	86.89	22.71	25.35	43.67	0.4091	1.9897
LOC_Os02g10490	expressed protein	2.53333	1.99	22.5133	1.39667	1.41333	6.80333	0.0883921	3.30916
LOC_Os03g19080	expressed protein	5.92333	6.18333	34.28	4.53	4.23667	13.5133	0.180377	2.53675
LOC_Os09g21450	cyclin, putative, expressed	3.81667	19.3033	27.0467	3.44333	8.26	14.85	0.713705	1.82132
LOC_Os07g31430	phosphate-induced protein 1 conserved region domain containing protein, expressed	0.593333	2.70667	8.63	0.7	1.38667	3.47333	0.313635	2.48464
LOC_Os02g40440	GDSL-like lipase/acylhydrolase, putative, expressed	11.96	30.4067	41.0433	9.91333	26.5667	19.22	0.740843	2.13545
LOC_Os07g39920	formin, putative, expressed	0.833333	4.08333	7.04667	0.573333	1.67	2.65333	0.57947	2.65578
LOC_Os04g45890	retrotransposon protein, putative, unclassified, expressed	0.0266667	6.32333	8.42333	0.0166667	2.37667	3.33667	0.750693	2.52448
LOC_Os06g36560	inositol oxygenase, putative, expressed	11.7467	16.3867	37.42	10.57	22.49	15.6067	0.437912	2.39769
LOC_Os02g47130	expressed protein	13.9533	19.99	114.893	8.87667	9.93667	42.46	0.173987	2.70592
LOC_Os09g36110	OsSub59 - Putative Subtilisin homologue, expressed	1.20333	1.18	7.58667	1.11667	1.23667	3.37	0.155536	2.25124
LOC_Os05g30570	heavy metal-associated domain containing protein, expressed	0.146667	4.46	7.43	0.17	1.2	2.64	0.600269	2.81439
LOC_Os06g33200	expressed protein	2.25667	24.7667	25.1467	0.346667	0.916667	2.73	0.984889	9.21123
LOC_Os03g20580	expressed protein	1.19	1.07333	6.53	0.95	1.16333	2.84	0.16437	2.2993
LOC_Os04g49680	DUF581 domain containing protein, expressed	5.61667	18.82	29.58	6.14667	9.24	9.80667	0.636241	3.01632
LOC_Os09g12240	serine/threonine-protein kinase BRI1-like 1 precursor, putative, expressed	1.25667	3.82667	8.42333	1.32	2.04333	3.35333	0.454294	2.51193
LOC_Os01g53260	WRKY23, expressed	0.0866667	2.33333	16.7233	0.04	0.433333	1.99	0.139526	8.40369
LOC_Os03g47650	ankyrin, putative, expressed	8.37333	17.2833	38.7067	3.89667	6.39	14.7267	0.446521	2.62834
LOC_Os03g64030	receptor protein kinase, putative, expressed	11.1733	15.1	47.44	10.2633	13.4	24.8633	0.318297	1.90803
LOC_Os10g38920	protein kinase domain containing protein, expressed	0.516667	0.923333	6.62333	0.34	0.706667	2.81667	0.139406	2.35148
LOC_Os09g16520	cytochrome b5-like Heme/Steroid binding domain containing protein, expressed	0.586667	5.58	13.74	0.393333	2.51333	4.08	0.406114	3.36765
LOC_Os03g37810	expressed protein	24.3233	41.0333	114.633	16.99	13.77	48.4233	0.357953	2.36732
LOC_Os02g10990	FAD binding domain of DNA photolyase domain containing protein, expressed	0.54	0.743333	5.01	1.27667	1.27667	2.14	0.14837	2.34112
LOC_Os04g46740	pectinesterase, putative, expressed	8.35333	5.65333	59.14	4.17333	6.63	23.8033	0.0955924	2.48453
LOC_Os08g16820	retrotransposon protein, putative, SINE subclass, expressed	1.07667	9.38667	29.7533	1.30667	4.79667	9.02333	0.315483	3.29738
LOC_Os04g19114	retrotransposon protein, putative, Ty3-gypsy subclass, expressed	0.0633333	2.19333	2.27333	0.0566667	0.66	1.04333	0.964809	2.17891
LOC_Os05g11570	NLI interacting factor-like phosphatase, putative, expressed	5.70333	7.1	56.8567	2.58667	4.2	19.7867	0.124875	2.87348
LOC_Os05g45580	expressed protein	2.61	2.25333	15.2333	1.83333	1.49667	5.51667	0.147921	2.76133
LOC_Os06g43044	GDSL-like lipase/acylhydrolase, putative, expressed	11.74	21.6133	65.9033	10.7067	17.05	32.6367	0.327955	2.0193
LOC_Os02g17350	VHS and GAT domain containing protein, expressed	4.14333	7.45667	13.5733	3.05333	6.28	6.92667	0.549361	1.95958
LOC_Os10g23060	expressed protein	5.74	15.56	49.4633	3.42333	8.34333	18.4467	0.314576	2.68142
LOC_Os02g06830	expressed protein	2.03333	2.93	12.1067	1.68667	2.22667	6.21333	0.242015	1.9485
LOC_Os12g02540	BTBN23 - Bric-a-Brac, Tramtrack, Broad Complex BTB domain with non-phototropic hypocotyl 3 NPH3 and coiled-coil domains, expressed	1.3	4.85333	8.54	1.26333	2.17667	4.41	0.568306	1.93651
LOC_Os03g14080	transmembrane amino acid transporter protein, putative, expressed	0.25	1.26667	4.47667	0.176667	0.603333	1.08333	0.282949	4.13231
LOC_Os06g44050	methyladenine glycosylase, putative, expressed	8.18333	13.0467	26.5367	8.95333	9.37	13.39	0.491647	1.98183
LOC_Os03g11400	targeting protein-related, putative, expressed	6.30333	5.29333	43.6	4.67667	3.9	13.7967	0.121407	3.16018
LOC_Os02g51890	RNA recognition motif containing protein, putative, expressed	4.42	18.1733	20.33	4.6	9.34333	10.4067	0.893917	1.95356
LOC_Os08g39270	fasciclin domain containing protein, expressed	28.6933	72.6733	125.853	23.3733	32.1367	62.9867	0.577445	1.99809
LOC_Os04g33680	glutaredoxin, putative, expressed	3.03	2.53333	23.0133	1.73	1.44	7.97	0.110081	2.88749
LOC_Os08g17160	plastocyanin-like domain containing protein, putative, expressed	16.66	24.1367	141.85	10.54	9.06667	41.8033	0.170156	3.39327
LOC_Os03g18630	receptor-like kinase RHG1, putative, expressed	3.60333	1.82333	18.5033	2.32333	1.89667	5.41333	0.0985408	3.4181
LOC_Os01g08320	OsIAA1 - Auxin-responsive Aux/IAA gene family member, expressed	4.42333	21.3233	17.7933	5.15667	7.37	7.98	1.19839	2.22974
LOC_Os04g41810	expressed protein	7.16	10.2567	22.42	6.93	5.66667	9.28	0.457478	2.41595
LOC_Os05g49760	dehydrogenase, putative, expressed	1.06667	1.80667	8.26333	0.956667	2.05333	3.66	0.218637	2.25774
LOC_Os05g32270	AP2 domain containing protein, expressed	17.3967	37.4167	63.9933	14.01	23.8133	32.6967	0.584696	1.95718
LOC_Os07g47590	expressed protein	1.48667	4.14667	13.67	0.846667	2.46667	6.17	0.303341	2.21556
LOC_Os03g18350	importin subunit beta, putative, expressed	1.68333	2.00667	12.3867	1.35667	1.53333	6.11667	0.162002	2.02507
LOC_Os11g14240	expressed protein	1.44667	1.35333	9.21667	0.85	0.923333	3.86333	0.146835	2.38568
LOC_Os12g04150	alpha/beta hydrolase fold, putative, expressed	0.34	43.5533	148.36	0.25	19.12	45.08	0.293565	3.29104
LOC_Os02g07180	expressed protein	2.34333	2.09	20.8133	1.74667	2.08667	10.17	0.100416	2.04654
LOC_Os01g50200	UDP-glucoronosyl and UDP-glucosyl transferase domain containing protein, expressed	0.496667	5.31333	5.93333	0.526667	2.93667	2.65333	0.895506	2.23618
LOC_Os04g49210	naringenin,2-oxoglutarate 3-dioxygenase, putative, expressed	3.55667	4.20333	30.4067	1.43	1.42	4.91667	0.138237	6.18441
LOC_Os08g25310	phosphatidylinositol transfer, putative, expressed	10.3467	23.8667	28.01	13.87	6.95	10.22	0.852077	2.7407
LOC_Os07g17970	AMP-binding domain containing protein, expressed	0.18	0.49	5.06667	0.0966667	0.33	0.81	0.0967105	6.25514
LOC_Os02g47180	WD repeat-containing protein, putative, expressed	28.83	25.4233	145.733	17.9133	25.6833	59.1033	0.174451	2.46574
LOC_Os02g09220	cytochrome P450, putative, expressed	0.526667	1.55667	6.63	0.356667	0.57	1.97667	0.234791	3.35413
LOC_Os08g06100	O-methyltransferase, putative, expressed	27.0067	99.6467	135.933	33.2433	54.7467	71.2267	0.733055	1.90846
LOC_Os02g35940	gibberellin receptor GID1L2, putative, expressed	2.20667	10.63	11.9	1.49333	4.4	4.25667	0.893277	2.79561
LOC_Os03g22040	expressed protein	7.88667	7.49333	31.7067	6.21333	7.01	14.71	0.236333	2.15545
LOC_Os02g30850	OsGrx_C8 - glutaredoxin subgroup III, expressed	0.19	22.12	8.67667	0.353333	0.7	2.29333	2.54937	3.78343
LOC_Os12g41680	No apical meristem protein, putative, expressed	1.62	7.68667	15.5967	1.48667	3.87	7.15667	0.49284	2.17932
LOC_Os01g09260	cytokinin dehydrogenase precursor, putative, expressed	0	1.87667	43.0767	0	0.553333	9.04333	0.0435657	4.76336
LOC_Os01g56360	wax synthase, putative, expressed	0.496667	2.22	4.45	0.43	2.03667	2.05667	0.498876	2.1637
LOC_Os11g02540	WRKY50, expressed	0.173333	4.44	8.64333	0.116667	4.89333	3.52	0.513691	2.45549
LOC_Os06g03540	oligopeptide transporter, putative, expressed	2.45	6.81667	11.9733	2.57	3.13	4.57	0.569321	2.61999
LOC_Os04g43230	expressed protein	5.64	5.29667	34.4867	4.63333	4.74333	15.4933	0.153586	2.2259
LOC_Os01g09790	IQ calmodulin-binding motif domain containing protein, expressed	2.12	3.01333	19.87	1.52	4.04333	10.42	0.151652	1.90691
LOC_Os11g02730	harpin-induced protein 1 domain containing protein, expressed	2.35	12.5167	16.1367	2.31	8.05333	8.23333	0.775666	1.95992
LOC_Os01g70560	expressed protein	11.62	8.99	91.68	6.00333	7.28	33.78	0.0980585	2.71403
LOC_Os07g40130	retrotransposon protein, putative, Ty3-gypsy subclass, expressed	70.2167	145.46	273.347	80.1267	60.28	126.967	0.532145	2.1529
LOC_Os03g58320	indole-3-glycerol phosphate lyase, chloroplast precursor, putative, expressed	0.216667	0.05	7.21333	0.08	0.186667	0.233333	0.00693161	30.9143
LOC_Os05g36090	zinc finger DHHC domain-containing protein, putative, expressed	6.25	8.13333	18.9433	4.41	3.98667	8.15667	0.429351	2.32244
LOC_Os02g44730	tetracycline transporter protein, putative, expressed	0.383333	3.81667	3.79333	0.43	2.11667	1.66667	1.00615	2.276
LOC_Os01g55560	ABIL3, putative, expressed	15.0933	26.1567	46.6567	12.8833	15.7567	23.4567	0.56062	1.98906
LOC_Os04g50770	MYB family transcription factor, putative, expressed	0.0866667	1.71	4.60667	0.15	0.503333	1.59	0.371201	2.89727
LOC_Os04g27810	retrotransposon protein, putative, Ty3-gypsy subclass, expressed	0.116667	24.1733	42.68	0.21	6.78667	17.81	0.566386	2.39641
LOC_Os03g60480	heavy metal-associated domain containing protein, expressed	17.8633	21.08	54.7667	14.28	13.69	20.7	0.384906	2.64573
LOC_Os05g35240	expressed protein	0.936667	4.08333	12.2467	0.62	0.913333	4.46667	0.333424	2.74179
LOC_Os12g39130	fibroin heavy chain precursor, putative, expressed	6.43	11.92	47.07	5.06667	9.01333	22.3233	0.25324	2.10856
LOC_Os03g62270	MATE efflux family protein, putative, expressed	0.756667	2.01333	8.26667	0.496667	0.54	3.19	0.243548	2.59143
LOC_Os01g74146	WD repeat-containing protein, putative, expressed	4.05	2.77	23.8533	2.41	2.31	7.28333	0.116126	3.27506
LOC_Os02g09200	cytochrome P450 71D10, putative, expressed	0.106667	0.773333	4.33333	0.0466667	0.03	0.303333	0.178462	14.2857
LOC_Os01g01890	expressed protein	7.43	6.29667	44.0933	4.78333	4.77333	15.37	0.142803	2.86879
LOC_Os01g56020	expressed protein	2.56	1.95	16.6467	1.93667	1.30333	6.06333	0.117141	2.74546
LOC_Os09g36740	tetratricopeptide repeat domain containing protein, expressed	7.98667	7.45	56.0067	4.06	5.17	20.7867	0.13302	2.69436
LOC_Os07g38730	tubulin/FtsZ domain containing protein, putative, expressed	140.153	262.433	493.373	132.64	165.633	258.607	0.531916	1.90781
LOC_Os03g26910	uncharacterized glycosyl hydrolase Rv2006/MT2062, putative, expressed	26.1767	79.9967	87.7633	16.7533	61.3367	39.0233	0.911504	2.249
LOC_Os02g45040	retrotransposon protein, putative, unclassified, expressed	1.76333	2.38	6.62667	1.20333	1.28	2.82	0.359155	2.34988
LOC_Os02g49260	transporter-related, putative, expressed	0.846667	1.83667	7.21667	1.79	0.503333	2.46667	0.254503	2.92568
LOC_Os05g30510	expressed protein	0.596667	4.86	19.3067	0.153333	3.52667	3.14333	0.251727	6.1421
LOC_Os11g27264	OsSCP60 - Putative Serine Carboxypeptidase homologue, expressed	0.23	0.513333	4.59667	0.22	0.67	2.13333	0.111675	2.15469
LOC_Os02g44130	ZOS2-14 - C2H2 zinc finger protein, expressed	4.13	15.6533	14.62	2.57	5.55	6.88	1.07068	2.125
LOC_Os06g13210	peptide transporter PTR2, putative, expressed	0.74	1.11	5.80667	0.506667	2.87333	2.14667	0.19116	2.70497
LOC_Os03g03320	expressed protein	0.48	2.32	7.06667	0.353333	0.286667	1.96	0.328302	3.60544
LOC_Os03g17680	expressed protein	12.6233	21.3167	75.2967	11.2	13.0167	29.69	0.283102	2.5361
LOC_Os06g28480	polygalacturonase inhibitor 1 precursor, putative, expressed	2.99	4.56	15.1	2.44333	2.59667	6.44667	0.301987	2.3423
LOC_Os03g20440	VQ domain containing protein, putative, expressed	1.49	5.69667	10.3667	0.87	3.13667	3.64	0.549518	2.84799
LOC_Os03g03630	expressed protein	9.36	6.19333	49.9333	5.35	5.59	17.62	0.124032	2.8339
LOC_Os12g14220	expressed protein	15.4233	7.18333	67.6167	9.66333	4.09333	29.7167	0.106236	2.27538
LOC_Os06g43770	expressed protein	1.74	4.69667	12.28	1.56667	3.84333	6.23333	0.382465	1.97005
LOC_Os11g11890	protein kinase domain containing protein, expressed	11.0133	28.5233	23.4067	0.696667	3.50333	3.78	1.2186	6.19224
LOC_Os05g46350	IQ calmodulin-binding motif domain containing protein, expressed	4.01	3.34	22.98	3.66667	5.38333	9.52333	0.145344	2.41302
LOC_Os10g25310	SPX domain containing protein, putative, expressed	2.17	5.05667	12.5	1.30333	2.96	4.95	0.404533	2.52525
LOC_Os01g11990	expressed protein	0.693333	1.19	5.71667	0.48	1.14	2.17333	0.208163	2.63037
LOC_Os07g37850	expressed protein	4.05667	32.3233	24.1433	2.96667	10.48	9.80333	1.33881	2.46277
LOC_Os06g45184	retrotransposon protein, putative, Ty3-gypsy subclass, expressed	0.22	1.27333	3.13667	0.426667	0.39	1.37333	0.405951	2.28398
LOC_Os02g26140	microtubule-binding protein TANGLED1, putative, expressed	2.36667	1.58667	15.5133	1.27	1.86667	6.26667	0.102278	2.47553
LOC_Os07g07930	LTPL78 - Protease inhibitor/seed storage/LTP family protein precursor, expressed	16.1567	39.0233	75.38	10.2467	13.46	36.38	0.517688	2.07202
LOC_Os05g13320	C4-dicarboxylate transporter/malic acid transport protein, expressed	3.74333	3.58667	14.5333	4.47	2.65	7.48667	0.246789	1.94123
LOC_Os02g43050	kinesin motor domain containing protein, expressed	11.2767	11.76	46.6867	8.67667	22.3	22.1533	0.251892	2.10743
LOC_Os05g39170	expressed protein	1.26667	1.91	8.15667	0.576667	1.3	3.38333	0.234164	2.41084
LOC_Os02g45170	helix-loop-helix DNA-binding protein, putative, expressed	1.71	3.29667	7.06667	1.52667	2.81	3.43667	0.466509	2.05626
LOC_Os03g07260	tetratricopeptide repeat domain containing protein, expressed	0.883333	1.14	8.63333	0.586667	0.713333	3.03333	0.132046	2.84615
LOC_Os02g37850	expressed protein	1.59667	1.62	8.86333	1.05	1.75	4.66667	0.182775	1.89929
LOC_Os08g44210	dihydroneopterin aldolase, putative, expressed	9.05	21.6867	34.2267	7.96333	19.6367	16.81	0.633619	2.03609
LOC_Os05g43690	glucan endo-1,3-beta-glucosidase-like protein 3 precursor, putative, expressed	107.003	201.893	247.377	95.85	96.91	126.19	0.816137	1.96035
LOC_Os02g58470	expressed protein	4.34667	3.40333	20.8067	2.69333	2.72667	9.55667	0.163569	2.17719
LOC_Os10g33370	3-ketoacyl-CoA synthase precursor, putative, expressed	2.78	4.45667	7.84667	2.13333	2.58333	3.74	0.567969	2.09804
LOC_Os06g01960	retrotransposon protein, putative, unclassified, expressed	0.156667	6.96667	9.20667	0.22	0.3	2.32667	0.756698	3.95702
LOC_Os01g68570	expressed protein	18.4967	38.3267	54.6833	15.1967	16.6167	26.61	0.700884	2.05499
LOC_Os05g41990	peroxidase precursor, putative, expressed	0.796667	1.34667	7.73333	0.51	0.7	2.14333	0.174138	3.60809
LOC_Os03g56700	expressed protein	4.45333	3.67333	29.9733	1.98333	2.79	9.48667	0.122553	3.15952
LOC_Os05g48330	aspartyl protease family protein, putative, expressed	22.5567	24.8367	66.7233	19.9767	14.1433	19.3833	0.372234	3.4423
LOC_Os12g05360	ligA, putative, expressed	0.876667	3.88333	8.15667	0.98	2.28667	2.53	0.476093	3.22398
LOC_Os02g15820	extra-large G-protein-related, putative, expressed	1.50667	8.81	7.64333	1.60333	2.87333	3.84333	1.15264	1.98873
LOC_Os08g01190	ATOFP18/OFP18, putative, expressed	0.186667	1.36	5.75667	0.136667	0.443333	2.07	0.236248	2.781
LOC_Os03g25330	peroxidase precursor, putative, expressed	0.03	1.36333	8.77333	0	0.636667	2.44333	0.155395	3.59072
LOC_Os01g14090	kinesin motor domain containing protein, putative, expressed	5.60333	4.29667	28.7033	3.51	4.95667	15.4733	0.149692	1.85502
LOC_Os01g32460	expressed protein	0.293333	7.26333	10.3767	0.173333	2.18	1.35667	0.699968	7.64865
LOC_Os07g30250	RFT1, putative, expressed	21.6567	34.4367	46.4633	20.3133	20.33	22.03	0.741158	2.10909
LOC_Os06g29340	retrotransposon protein, putative, unclassified, expressed	0.17	1.08	2.72	0.11	0.136667	0.7	0.397059	3.88571
LOC_Os06g35520	peroxidase precursor, putative, expressed	2.20667	6.40333	97.47	1.14	6.44	26.63	0.0656954	3.66016
LOC_Os04g42540	expressed protein	7.21667	4.23	43.0067	4.08333	3.83333	14.4933	0.0983568	2.96734
LOC_Os05g25620	caltractin, putative, expressed	1.94667	1.20667	17.4267	1.10333	0.723333	6.92667	0.0692425	2.51588
LOC_Os12g28750	TPD1, putative, expressed	0.893333	4.34333	8.98667	0.916667	1.44	2.58667	0.483309	3.47423
LOC_Os11g26710	MEGL5 - Maternally expressed gene MEG family protein precursor, putative, expressed	2.49	6.72	25.5833	0.646667	1.34667	2.64333	0.262671	9.67844
LOC_Os04g56060	protein kinase domain containing protein, expressed	1.95667	3.94333	8.44667	1.43333	1.96	4.2	0.466851	2.01111
LOC_Os05g48270	auxin-responsive protein, putative, expressed	2.87333	4.26333	10.1467	1.84	2.91	4.71	0.420171	2.15428
LOC_Os01g54810	lipase, putative, expressed	6.57667	5.56333	24.3	4.55333	4.35667	9.32667	0.228944	2.60543
LOC_Os05g49820	chloroplast unusual positioning protein, putative, expressed	4.12	2.05	14.0333	2.83	2.38	6.10333	0.146081	2.29929
LOC_Os01g70970	protein kinase, putative, expressed	2.91333	2.3	11.7133	2.06333	2.52	5.71	0.196357	2.05137
LOC_Os05g43820	ras-related protein, putative, expressed	2.08333	2.35667	9.46	1.62333	3.04333	4.18	0.249119	2.26316
LOC_Os05g49830	lipase class 3 family protein, putative, expressed	0.0233333	5.03	12.5467	0	1.71333	1.50667	0.400903	8.32743
LOC_Os03g50420	expressed protein	3.79667	3.07667	26.7433	1.96333	2.73	9.80333	0.115044	2.72798
LOC_Os07g33370	IQ calmodulin-binding motif family protein, expressed	1.10333	1.11	5.43667	0.773333	0.696667	2.33667	0.204169	2.32668
LOC_Os04g51110	WD repeat-containing protein, putative, expressed	31.3067	28.17	105.523	20.86	31.6	50.3	0.266955	2.09788
LOC_Os01g52320	NB-ARC domain containing protein, expressed	0.0366667	0.636667	5.99333	0	0.303333	1.62333	0.106229	3.69199
LOC_Os09g11440	expressed protein	1.92333	1.81	11.6167	1.42	1.77667	3.76667	0.155811	3.08407
LOC_Os04g42720	TMS membrane protein/tumour differentially expressed protein, putative, expressed	1.09333	1.05	11.32	0.676667	0.733333	2.99667	0.0927562	3.77753
LOC_Os01g08810	cytochrome P450, putative, expressed	1.64333	3.91	10.16	0.956667	1.50333	3.14667	0.384843	3.22881
LOC_Os01g13690	ligA, putative, expressed	0.783333	1.16333	6.86667	0.28	1.14	2.08333	0.169417	3.296
LOC_Os03g02190	protein kinase domain containing protein, expressed	0.163333	0.593333	2.53667	0.156667	0.223333	0.47	0.233903	5.39716
LOC_Os11g31940	GDSL-like lipase/acylhydrolase, putative, expressed	0	0.376667	7.15	0.0133333	0.263333	2.75333	0.0526807	2.59685
LOC_Os02g42660	sphingolipid delta desaturase, putative, expressed	3.83333	5.9	11.7467	4.41333	3.15	5.63333	0.50227	2.08521
LOC_Os01g32380	expressed protein	4.1	32.7933	30.96	3.59	26.9333	9.06	1.05922	3.41722
LOC_Os06g12610	auxin efflux carrier component, putative, expressed	1.86667	9.83667	11.08	1.24667	4.08333	5.02	0.887786	2.20717
LOC_Os02g35180	OsRR2 type-A response regulator, expressed	10.3467	17.3433	26.8067	11.4167	28.3233	13.1133	0.646978	2.04423
LOC_Os07g46480	eukaryotic aspartyl protease domain containing protein, expressed	14.53	30.31	51.65	11.18	13.8033	23.01	0.586834	2.24468
LOC_Os01g53430	anthocyanidin 5,3-O-glucosyltransferase, putative, expressed	0.123333	0.963333	2.66	0.473333	0.0466667	0.543333	0.362155	4.89571
LOC_Os02g33705	expressed protein	1.38	4.19667	6	1.90667	2.07667	2.43333	0.699444	2.46575
LOC_Os01g01840	helix-loop-helix DNA-binding domain containing protein, expressed	0.0566667	2.46	17.6867	0.0166667	0.903333	3.01333	0.139088	5.86947
LOC_Os10g05660	thaumatin, putative, expressed	14.9233	28.1033	37	13.15	16.0067	15.82	0.75955	2.33881
LOC_Os10g36360	expressed protein	2.55	9.54	16.8633	2.67667	3.28667	3.43333	0.565724	4.91165
LOC_Os05g29750	cytochrome P450 71E1, putative, expressed	0.983333	4.71	4.83667	0.576667	2.51	2.13333	0.973811	2.26719
LOC_Os03g61670	calreticulin precursor, putative, expressed	11.1433	13.5633	46.0233	8.99333	5.19	16.23	0.294706	2.8357
LOC_Os01g56570	xylosyltransferase, putative, expressed	0.0933333	0.753333	2.66667	0.03	0.523333	0.413333	0.2825	6.45161
LOC_Os01g12720	protein kinase domain containing protein, expressed	7.41333	8.48333	19.5667	6.54333	7.15667	9.77667	0.43356	2.00136
LOC_Os02g43470	glutamate dehydrogenase protein, putative, expressed	0.0733333	0.706667	2.62333	0.136667	0.38	0.556667	0.269377	4.71257
LOC_Os06g03120	aspartic proteinase nepenthesin-2 precursor, putative, expressed	0.02	0.64	5.55333	0.03	0.18	1.20667	0.115246	4.60221
LOC_Os03g18110	proteins of unknown function domain containing protein, putative, expressed	1.55333	2.43	6.83333	0.846667	0.756667	3.22333	0.35561	2.11996
LOC_Os11g04360	alpha/beta hydrolase fold, putative, expressed	0.0233333	2.72667	7.51667	0	0.806667	1.53	0.362749	4.91285
LOC_Os08g05720	integral membrane protein, putative, expressed	0.17	1.91	7.71	0	0.06	1.07667	0.24773	7.16099
LOC_Os01g24560	fruit bromelain precursor, putative, expressed	0	0.143333	5.03	0	0.05	1.19333	0.0284957	4.21508
LOC_Os02g42650	expansin precursor, putative, expressed	0.483333	0.21	3.74667	0.27	0.21	0.576667	0.0560498	6.49711
LOC_Os04g54130	TKL_IRAK_DUF26-ld.1 - DUF26 kinases have homology to DUF26 containing loci, expressed	0.12	0.826667	1.65333	0.136667	0.21	0.146667	0.5	11.2727
LOC_Os01g53030	expressed protein	1.99333	2.42	10.4967	1.55333	1.32333	3.04333	0.230549	3.44907
LOC_Os02g30280	expressed protein	3.92667	3.6	12.4833	4.45667	1.84667	5.67667	0.288385	2.19906
LOC_Os03g30830	X8 domain containing protein, expressed	5.72667	5.06667	17.5367	5.86667	7.83	7.52	0.288918	2.332
LOC_Os04g35890	TKL_IRAK_CR4L.3 - The CR4L subfamily has homology with Crinkly4, expressed	1.64	3.76	5.36	2.01	2.68	2.12	0.701493	2.5283
LOC_Os03g58900	galactosyltransferase family protein, putative, expressed	4.78333	3.88	21.4567	3.54667	3.48	7.55	0.18083	2.84194
LOC_Os06g39330	UDP-glucoronosyl and UDP-glucosyl transferase domain containing protein, expressed	6.85667	8.88	17.43	5.20333	2.96667	4.52667	0.509466	3.85052
LOC_Os11g42450	leucine-rich repeat family protein, putative, expressed	1.1	7.21667	8.33333	1.50667	3.22667	2.89	0.866	2.88351
LOC_Os01g71780	WD domain, G-beta repeat domain containing protein, expressed	3.04	1.54	11.5067	3.71333	1.34667	4.64333	0.133835	2.4781
LOC_Os11g31715	expressed protein	0.04	0.303333	3.83667	0.0833333	0.363333	1.14667	0.0790617	3.34593
LOC_Os11g27400	glycosyl hydrolase, putative, expressed	0.11	0.46	2.13333	0.06	0.146667	0.326667	0.215625	6.53061
LOC_Os09g37310	retrotransposon protein, putative, unclassified, expressed	1.85	5.60333	10.4767	1.03333	2.56333	3.78	0.534839	2.7716
LOC_Os03g48220	expressed protein	16.27	33.3533	44.0333	12.4167	21.0533	21.7733	0.757456	2.02235
LOC_Os02g43280	aldehyde dehydrogenase, putative, expressed	4.67	4.82333	15.0067	3.96667	3.43667	5.98	0.321413	2.50948
LOC_Os01g61160	laccase precursor protein, putative, expressed	0.0966667	0.136667	1.79	0.0966667	0.0766667	0.51	0.0763501	3.5098
LOC_Os05g42190	NADPH-dependent FMN reductase domain containing protein, expressed	1.8	1.19333	8.2	2.21333	1.52	3.06333	0.145528	2.67682
LOC_Os03g43650	uncharacterized protein At4g06744 precursor, putative, expressed	0.05	0.213333	1.75	0	0.0333333	0.366667	0.121905	4.77273
LOC_Os01g65660	amino acid transporter, putative, expressed	2.51333	2.45333	6.59667	2.5	3.55	2.45667	0.371905	2.68521
LOC_Os02g11960	ABC transporter, ATP-binding protein, putative, expressed	3.23	9.57333	9.00333	1.44333	6.39	4.18	1.06331	2.15391
LOC_Os01g42380	pleiotropic drug resistance protein, putative, expressed	24.4167	17.9667	84.6267	19.5233	13.9233	41.6667	0.212305	2.03104
LOC_Os01g17402	cyclin, putative, expressed	1.29	1.31667	5.95333	0.813333	0.946667	2.14	0.221165	2.78193
LOC_Os07g09610	CAMK_KIN1/SNF1/Nim1_like_AMPKh.1 - CAMK includes calcium/calmodulin depedent protein kinases, expressed	1.94667	4.06	6.74667	1.94667	3.65	3.32333	0.601779	2.03009
LOC_Os03g25120	HSF-type DNA-binding domain containing protein, expressed	1.70667	3.17	7.21	0.833333	2.58	3.46	0.439667	2.08382
LOC_Os03g30620	expressed protein	0.39	1.78667	5.42	0.0566667	1.3	1.00333	0.329643	5.40199
LOC_Os01g36220	bZIP transcription factor domain containing protein, expressed	0.23	0.526667	2.58	0.253333	0.296667	0.353333	0.204134	7.30189
LOC_Os06g11010	eukaryotic aspartyl protease domain containing protein, expressed	0.116667	0.43	2.4	0.03	0.14	0.226667	0.179167	10.5882
LOC_Os01g38180	peptidyl-prolyl isomerase, putative, expressed	1.98333	7.01333	6.09	1.62667	4.81	3.02333	1.15161	2.01433
LOC_Os07g49140	expressed protein	0.0266667	0.01	0.943333	0.01	0.0233333	0.15	0.0106007	6.28889
LOC_Os11g43750	polygalacturonase, putative, expressed	4.81667	6.08667	13.86	4.11667	5.92	7.26333	0.439153	1.90821
LOC_Os04g42240	expressed protein	0.01	1.49667	2.93333	0.05	0.79	1.03667	0.510227	2.82958
LOC_Os10g38160	glutathione S-transferase, putative, expressed	0.02	0.35	8.92667	0	0.0833333	1.43333	0.0392084	6.22791
LOC_Os08g22604	expressed protein	24.3367	32.2567	73	15.0667	37.07	31.46	0.441872	2.32041
LOC_Os03g13200	peroxidase precursor, putative, expressed	3.90333	1.73333	11.2933	3.32333	0.893333	4.64	0.153483	2.43391
LOC_Os04g36070	OsRR1 type-A response regulator, expressed	5.67	8.12667	15.1733	3.47	8.56333	4.78333	0.535589	3.17213
LOC_Os11g07050	FHA domain containing protein, putative, expressed	4.76	3.29667	14.4233	3.72	3.35667	6.37333	0.228565	2.26308
LOC_Os02g56570	TBC domain containing protein, expressed	2.21	1.68667	6.54	2.24667	1.57	2.68333	0.2579	2.43727
LOC_Os08g02094	GDSL-like lipase/acylhydrolase, putative, expressed	6.87	5.04333	21.18	3.70667	5.09	7.57667	0.238118	2.79542
LOC_Os01g53240	BURP domain containing protein, expressed	8.45333	12.2033	24.5067	11.8333	18.6133	11.3467	0.49796	2.15981
LOC_Os07g34260	chalcone and stilbene synthases, putative, expressed	6.72667	11.0833	63.4633	7.98333	5.31333	13.76	0.174642	4.61216
LOC_Os04g49700	zinc finger, C3HC4 type domain containing protein, expressed	0.123333	0.22	1.67	0.106667	0.166667	0.463333	0.131737	3.60432
LOC_Os12g16210	zinc finger family protein, putative, expressed	2.94667	2.92667	32.2733	1.80333	2.2	11.8833	0.0906837	2.71585
LOC_Os01g67290	cyclin-related protein, putative, expressed	10.1933	13.1667	23.44	9.91667	8.24333	11.42	0.561718	2.05254
LOC_Os12g02450	WRKY64, expressed	0	0.276667	2.27667	0.0166667	0.113333	0.396667	0.121523	5.7395
LOC_Os01g71970	GRAS family transcription factor containing protein, expressed	4.57667	6.78333	11.5067	6.02333	5.93333	6.01	0.589513	1.91459
LOC_Os01g16146	phenazine biosynthesis protein, putative, expressed	8.84333	10.4667	31.1733	7.59333	7.89667	11.9	0.335757	2.61961
LOC_Os07g12710	GIY-YIG catalytic domain containing protein, putative, expressed	1.25333	0.953333	8.87	0.556667	1.15667	3.44	0.107478	2.57849
LOC_Os11g13570	gibberellin receptor GID1L2, putative, expressed	0.62	0.68	3.44667	0.633333	0.803333	1.22	0.197292	2.82514
LOC_Os05g32460	VQ domain containing protein, putative, expressed	10.3867	23.9	35.8333	2.72667	28.03	14.03	0.666977	2.55405
LOC_Os03g39170	frigida, putative, expressed	0	0.223333	0.806667	0	0.0766667	0.0866667	0.27686	9.30769
LOC_Os04g58760	membrane associated DUF588 domain containing protein, putative, expressed	0	0.15	2.5	0	0.0866667	0.333333	0.06	7.5
LOC_Os11g06550	hypothetical protein	0	1.23333	6.57333	0.04	0.0466667	0.606667	0.187627	10.8352
LOC_Os08g38790	expressed protein	1.10333	1.03667	5.74	0.546667	0.853333	2.08667	0.180604	2.7508
LOC_Os04g32120	expressed protein	0	2.49	7.95333	0	0.376667	0.6	0.313076	13.2556
LOC_Os02g50730	metalloendoproteinase 1 precursor, putative, expressed	6.01333	5.22667	15.95	4.14667	4.52	6.05	0.327691	2.63636
LOC_Os02g50040	endoglucanase, putative, expressed	7.94	2.82667	23.1	4.56	3.13333	8.52667	0.122367	2.70915
LOC_Os08g44620	zinc-binding protein, putative, expressed	3.02667	4.25	8.98	3.19	3.03	3.92667	0.473274	2.28693
LOC_Os01g43350	protein kinase family protein, putative, expressed	0.203333	0.563333	1.16	0.226667	0.196667	0.306667	0.485632	3.78261
LOC_Os01g62480	laccase precursor protein, putative, expressed	2.53	3.3	6.87333	1.35	1.49667	2.2	0.480116	3.12424
LOC_Os01g15830	peroxidase precursor, putative, expressed	5.01667	1.75	12.5133	4.25333	1.32667	3.38	0.139851	3.70217
LOC_Os05g49930	GRAS family transcription factor domain containing protein, expressed	0.26	0.85	2.06	0.0866667	0.306667	0.383333	0.412621	5.37391
LOC_Os12g38051	metallothionein, putative, expressed	0.193333	1.55	11.4433	0.186667	0.106667	0	0.13545	#DIV/0!
LOC_Os01g55510	dynein light chain type 1 domain containing protein, expressed	15.1533	48.5967	37.5467	9.51667	20.4133	8.97	1.2943	4.1858
LOC_Os10g41430	cyclin, putative, expressed	8.93	12.1033	24.0867	6.94	5.78	8.74667	0.502491	2.75381
LOC_Os02g32850	expressed protein	2.30667	1.9	7.93667	0.703333	0.726667	1.57	0.239395	5.0552
LOC_Os04g04330	receptor-like protein kinase 2 precursor, putative, expressed	0.103333	0.15	0.68	0.0433333	0.0833333	0.153333	0.220588	4.43478
LOC_Os03g12910	squalene monooxygenase, putative, expressed	35.2867	57.0533	78.4367	39.6833	31.54	33.6733	0.727381	2.32934
LOC_Os09g25784	auxin-induced protein 5NG4, putative, expressed	2.94667	4.07333	8.58333	2.56333	3.00333	3.37333	0.474563	2.54447
LOC_Os01g62970	expressed protein	1.97333	3.88	8.95667	1.12333	2.73333	3.03667	0.433197	2.94951
LOC_Os07g07790	LTPL75 - Protease inhibitor/seed storage/LTP family protein precursor, expressed	0	0.0533333	2.08	0	0	0.23	0.025641	9.04348
LOC_Os01g03840	ZOS1-02 - C2H2 zinc finger protein, expressed	0.883333	5.56667	6.49667	0.163333	0.57	1.60333	0.85685	4.05198
LOC_Os06g23600	expressed protein	0.483333	0.573333	2.12333	0.196667	0.5	0.596667	0.270016	3.55866
LOC_Os11g07600	ABC-2 type transporter domain containing protein, expressed	4.02	1.84333	9	3.48667	1.52	3.97	0.204815	2.267
LOC_Os07g48460	stress responsive protein, putative, expressed	1.46667	0.706667	4.67667	1.24	0.573333	1.69667	0.151105	2.75639
LOC_Os03g08620	B3 DNA binding domain containing protein, expressed	13.66	8.80333	34.1167	8.72667	14.6333	17.0833	0.258036	1.99707
LOC_Os02g09240	cytochrome P450 71D8, putative, expressed	11.6033	20.1733	26.7133	10.17	12.0867	11.8733	0.755178	2.24986
LOC_Os03g57970	LTPL73 - Protease inhibitor/seed storage/LTP family protein precursor, expressed	0.04	0.0966667	3.55667	0	0	0.276667	0.027179	12.8554
LOC_Os01g45990	potassium channel AKT1, putative, expressed	5.94667	8.03	17.5133	4.6	5.76	7.30667	0.458508	2.3969
LOC_Os03g02280	DUF584 domain containing protein, putative, expressed	11.36	17.0467	34.3267	6.37667	5.93333	9.95333	0.496601	3.44876
LOC_Os02g56700	dehydrogenase, putative, expressed	0.746667	1.72	3.59333	0.37	0.13	0.696667	0.478664	5.15789
LOC_Os03g44650	glutaredoxin, putative, expressed	3.66333	2.96333	9.18667	2.29333	2.04	3.71	0.322569	2.47619
LOC_Os04g20330	UDP-glucoronosyl/UDP-glucosyl transferase, putative, expressed	0.28	0.946667	1.48667	0.333333	0.306667	0.4	0.636771	3.71667
LOC_Os10g07229	dehydrogenase, putative, expressed	1.36333	6.84333	7.18	1.03667	2.88333	3.74667	0.95311	1.91637
LOC_Os09g25070	WRKY62, expressed	1.06333	26.4433	38.9767	0.87	32.7233	13.3	0.67844	2.93058
LOC_Os06g07040	OsIAA20 - Auxin-responsive Aux/IAA gene family member, expressed	0.0333333	0.136667	2.07	0	0.0766667	0.1	0.0660225	20.7
LOC_Os07g43700	lactate/malate dehydrogenase, putative, expressed	5.85	4.12333	17.5967	4.26333	7.78	6.33333	0.234325	2.77842
LOC_Os07g48030	peroxidase precursor, putative, expressed	0.59	4.67667	15.39	0.266667	2	5.98667	0.303877	2.57071
LOC_Os12g38290	metallothionein, putative, expressed	0	0	14.78	0	0	0.0433333	0	341.077
LOC_Os08g41410	glucan endo-1,3-beta-glucosidase precursor, putative, expressed	0.67	1.37333	2.69667	0.603333	0.673333	0.95	0.509271	2.8386
LOC_Os01g61440	expressed protein	3.3	6.74	7.28	2.14333	3.44333	3.28333	0.925824	2.21726
LOC_Os08g21561	PPR repeat domain containing protein, putative, expressed	0	0	0.553333	0	0.17	0	0	#DIV/0!
LOC_Os06g11490	plastocyanin-like domain containing protein, putative, expressed	2.28333	1.6	7.37667	0.863333	0.236667	1.73333	0.2169	4.25577
LOC_Os01g57004	adhesive/proline-rich protein, putative, expressed	1.51667	2.34	7.23333	1.42667	0.953333	1.55667	0.323502	4.64668
