# Supplementary material for: Identification and Analysis of Genes Involved in Double Fertilization in Rice
Source: Int J Mol Sci. 2021 Nov 27;22(23):12850. doi: 10.3390/ijms222312850 (PMC8657449; doi:10.3390/ijms222312850)
Supplement: Supplementary file 1 [file ijms-22-12850-s001.zip › Table S23. GO enrichment analysis of the 430 genes related to the zygote formation and the endosperm nuclear division..xls]

## Sheet: Sheet1
Table S23. GO enrichment analysis of the 430 genes related to the zygote formation and the endosperm nuclear division.
GO ID	Term Type	Description	p-adjust	Gene number	Type
GO:0007018	BP	microtubule-based movement	0.000241615	23	Microtubule
GO:0007017	BP	microtubule-based process	0.000241615	26
GO:0048236	BP	plant-type sporogenesis	0.0458969	3	Sporulation
GO:0043934	BP	sporulation	0.0458969	3
GO:0034293	BP	sexual sporulation	0.0458969	3
GO:0007049	BP	cell cycle	0.0136859	8	Cell cycle
GO:0022402	BP	cell cycle process	0.0303394	10
GO:0006928	BP	movement of cell or subcellular component	0.000241615	23
GO:0009734	BP	auxin-activated signaling pathway	0.0087284	9
GO:0005875	CC	microtubule associated complex	0.000241615	16	Microtubule
GO:0005874	CC	microtubule	0.000241615	17
GO:0005871	CC	kinesin complex	0.000241615	14
GO:0099513	CC	polymeric cytoskeletal fiber	0.000241615	17
GO:0099512	CC	supramolecular fiber	0.000241615	17
GO:0099080	CC	supramolecular complex	0.000241615	17
GO:0099081	CC	supramolecular polymer	0.000241615	17
GO:0044430	CC	cytoskeletal part	0.000241615	24
GO:0008017	MF	microtubule binding	0.000261129	21	Microtubule
GO:0003777	MF	microtubule motor activity	0.000308003	19
GO:0008574	MF	ATP-dependent microtubule motor activity, plus-end-directed	0.00375892	4
GO:1990939	MF	ATP-dependent microtubule motor activity	0.00375892	4
GO:0008092	MF	cytoskeletal protein binding	0.000280236	22
GO:0017111	MF	nucleoside-triphosphatase activity	0.000280236	26
GO:0016818	MF	hydrolase activity, acting on acid anhydrides, in phosphorus-containing anhydrides	0.000280236	27
GO:0003774	MF	motor activity	0.000280236	19
GO:0015631	MF	tubulin binding	0.000280236	21
GO:0016817	MF	hydrolase activity, acting on acid anhydrides	0.000301408	27
GO:0016462	MF	pyrophosphatase activity	0.000521479	27
GO:0016787	MF	hydrolase activity	0.00118748	78
GO:0097027	MF	ubiquitin-protein transferase activator activity	0.00579945	3
GO:0055106	MF	ubiquitin-protein transferase regulator activity	0.00579945	3
GO:0005515	MF	protein binding	0.0092939	38
GO:0010997	MF	anaphase-promoting complex binding	0.0100045	3
GO:0003824	MF	catalytic activity	0.0109708	183
GO:0005200	MF	structural constituent of cytoskeleton	0.0347997	4
