# Supplementary material for: Identification and Analysis of Genes Involved in Double Fertilization in Rice
Source: Int J Mol Sci. 2021 Nov 27;22(23):12850. doi: 10.3390/ijms222312850 (PMC8657449; doi:10.3390/ijms222312850)
Supplement: Supplementary file 1 [file ijms-22-12850-s001.zip › Table S24. Primers used for qRT-PCR..xlsx]

## Sheet: Sheet1
Table S24. Primers used for qRT-PCR.
Gene ID	Gene name	Forward Primer (5’→3’)	Reverse Primer (5’→3’)	Amplicon size (bp)
LOC_Os02g12300	Pectate lyase	CAGATCACCGTGGCGTTCA	CAGTGCGTGTAGTCGTTGTTG	104
LOC_Os02g22820	Expressed protein	GGCGGTGGGGGAAGGAGAAA	GTGCCCCGGCCCTCTTCCTT	158
LOC_Os02g41910	OsFBO12	GCTTGCTGCTCTTCGGAATT	GCCTGCGGTGTACGGATAA	146
LOC_Os10g34730	GEM	AGATTGCCTTCCACAGTGATAG	AAGCCGTCAACAGTAACTACAT	172
LOC_Os02g26320	Fasciclin-like arabinogalactan protein	CGACGGCATCATGGTGTTC	CGGTGTTGCTGTTGCTGAC	158
LOC_Os11g09840	Expressed protein	CAGCGAACACAGCCTTACAC	CTGAGAGCGACGGTTGACT	229
LOC_Os04g48870	Nitrilase	GTTCTTGGGGACAAGATGGC	TCCGTGATAAGAAGGCCAGA	161
LOC_Os06g01210	Plastocyanin	TCACGTTCAAGAACAACGCC	CGCAGTAGAAGCCGTATGTG	168
LOC_Os04g49250	UDP-glucose/GDP-mannose dehydrogenase	TGAAGGACATGTACGCGCAA	TCACCGATGACACCCTCTG	120
LOC_Os01g07500	Alliin lyase	GCGGCCGGAGCAGACGAAAGA	CGCGGCGGTCTCCTTGGTGAA	175
LOC_Os06g10750	Integral membrane protein	CGCGTGGGCCGGTGTTCGT	CGCCGCCCTTGCCCCAGAT	162
LOC_Os10g38160	Glutathione S-transferase	GGCGGAGGGGGTGAAGCAAAC	CGCGACGAAGCCTCCGAGCAC	136
LOC_Os03g50885	Actin	CCCCAAGGCCAATCGTGAG	ACGCCCAGCAAGGTCGAGA	217
